# Supplementary material for: Novel Protein-Protein Interactions Highlighting the Crosstalk between Hypoplastic Left-Heart Syndrome, Ciliopathies and Neurodevelopmental Delays
Source: Preprints.org preprint supplement (doi:10.20944/preprints202202.0017.v1), 2022-02-01
Supplement: Supplementary file 1 [file Supplementary-Data.xlsx]

## Sheet: Data File S1
Data File S1. List of genes from the HLHS interactome, with their labels (HLHS candidate genes, known interactors and novel interactors), and the list of interactions, with their labels (known and novel interactions)
Genes		Protein-Protein Interactions
Gene	Label	Gene 1	Gene 2	Label
AGAP1	HLHS candidate gene	TSC22D1	TSC22D4	Known interaction
AMT	HLHS candidate gene	CTNNA3	CTNNB1	Known interaction
AP3B2	HLHS candidate gene	PSEN1	YME1L1	Known interaction
BICC1	HLHS candidate gene	PSEN1	UBQLN1	Known interaction
CCDC65	HLHS candidate gene	PSEN1	PSENEN	Known interaction
CCR1	HLHS candidate gene	PSEN1	RAB11A	Known interaction
CDH16	HLHS candidate gene	PSEN1	TCF7L2	Known interaction
CEP192	HLHS candidate gene	EP300	YY1	Known interaction
CKAP4	HLHS candidate gene	EP300	PROX1	Known interaction
COL15A1	HLHS candidate gene	EP300	SP3	Known interaction
CRACDL	HLHS candidate gene	EP300	TACC2	Known interaction
CTNNA3	HLHS candidate gene	EP300	TCF3	Known interaction
CTNNBL1	HLHS candidate gene	EP300	MEF2D	Known interaction
CYGB	HLHS candidate gene	EP300	PTMA	Known interaction
DCP2	HLHS candidate gene	EP300	NCOA3	Known interaction
DNAH1	HLHS candidate gene	EP300	SOX9	Known interaction
DSC2	HLHS candidate gene	EP300	TP53	Known interaction
DYRK4	HLHS candidate gene	EP300	MDC1	Known interaction
EP300	HLHS candidate gene	EP300	MITF	Known interaction
FDX1	HLHS candidate gene	EP300	NUP98	Known interaction
FER	HLHS candidate gene	EP300	ZNF76	Known interaction
FKBP11	HLHS candidate gene	EP300	SUB1	Known interaction
GALE	HLHS candidate gene	EP300	ZEB1	Known interaction
GLIPR1L2	HLHS candidate gene	EP300	SMAD2	Known interaction
GPR158	HLHS candidate gene	EP300	PML	Known interaction
GPR45	HLHS candidate gene	EP300	PPARA	Known interaction
HNRNPAB	HLHS candidate gene	EP300	SMAD7	Known interaction
HNRNPLL	HLHS candidate gene	EP300	RORA	Known interaction
KAT8	HLHS candidate gene	EP300	TCF7L2	Known interaction
KCNQ3	HLHS candidate gene	EP300	HOXB9	Known interaction
KDM3B	HLHS candidate gene	EP300	PCNA	Known interaction
KIAA0408	HLHS candidate gene	EP300	RAD23A	Known interaction
KIAA0586	HLHS candidate gene	EP300	RUNX3	Known interaction
KLHDC2	HLHS candidate gene	EP300	HMGN2	Known interaction
KRT6A	HLHS candidate gene	EP300	HAND2	Known interaction
LRRC8B	HLHS candidate gene	EP300	SNIP1	Known interaction
LVRN	HLHS candidate gene	EP300	STAT3	Known interaction
MAP3K8	HLHS candidate gene	EP300	SMAD3	Known interaction
MFSD6	HLHS candidate gene	EP300	PAX6	Known interaction
NAP1L1	HLHS candidate gene	EP300	RBM14	Known interaction
NCOA1	HLHS candidate gene	EP300	MDM2	Known interaction
NEUROD4	HLHS candidate gene	EP300	MAP2K1	Known interaction
NFRKB	HLHS candidate gene	EP300	SIRT1	Known interaction
NIF3L1	HLHS candidate gene	EP300	ZNF148	Known interaction
NOMO1	HLHS candidate gene	EP300	UBE2I	Known interaction
NPTX1	HLHS candidate gene	EP300	GATA6	Known interaction
NRDC	HLHS candidate gene	EP300	NR4A1	Known interaction
OIT3	HLHS candidate gene	EP300	ESR1	Known interaction
OXNAD1	HLHS candidate gene	EP300	TGFB1I1	Known interaction
PAN3	HLHS candidate gene	EP300	SMAD1	Known interaction
PCDHA9	HLHS candidate gene	EP300	NEUROD1	Known interaction
PLS3	HLHS candidate gene	EP300	TDG	Known interaction
PSEN1	HLHS candidate gene	EP300	EPAS1	Known interaction
RNASE13	HLHS candidate gene	EP300	FOXO3	Known interaction
RPS6KA1	HLHS candidate gene	EP300	ING4	Known interaction
RPTOR	HLHS candidate gene	EP300	SMAD4	Known interaction
SAP130	HLHS candidate gene	EP300	SREBF2	Known interaction
SERPINB7	HLHS candidate gene	EP300	STAT6	Known interaction
SLC12A5	HLHS candidate gene	EP300	KLF5	Known interaction
STT3B	HLHS candidate gene	EP300	ING1	Known interaction
TARS3	HLHS candidate gene	EP300	MEF2A	Known interaction
TMC6	HLHS candidate gene	EP300	MYC	Known interaction
TMPRSS15	HLHS candidate gene	EP300	ETV1	Known interaction
TRAPPC2L	HLHS candidate gene	EP300	IRF3	Known interaction
TSC1	HLHS candidate gene	EP300	TSG101	Known interaction
TSC22D1	HLHS candidate gene	EP300	POU3F2	Known interaction
TSPAN14	HLHS candidate gene	EP300	N4BP2	Known interaction
TSPAN15	HLHS candidate gene	EP300	HNRNPU	Known interaction
USP16	HLHS candidate gene	EP300	RAD50	Known interaction
UTP18	HLHS candidate gene	EP300	NCOA1	Known interaction
WFDC11	HLHS candidate gene	EP300	NOTCH1	Known interaction
WNT5A	HLHS candidate gene	EP300	HIF1A	Known interaction
XKR9	HLHS candidate gene	EP300	RELA	Known interaction
ZAN	HLHS candidate gene	EP300	MYBL2	Known interaction
A2M	Known interactor	EP300	RB1	Known interaction
ABI1	Known interactor	EP300	STAT5A	Known interaction
ABI3	Known interactor	EP300	TP63	Known interaction
ABL1	Known interactor	EP300	NR2F2	Known interaction
ACSM5	Known interactor	EP300	ING2	Known interaction
ACTA2	Known interactor	EP300	TFAP2A	Known interaction
ACTB	Known interactor	EP300	ZBTB17	Known interaction
ACTN1	Known interactor	EP300	TADA3	Known interaction
ACY3	Known interactor	EP300	NAP1L1	Known interaction
ADAMTSL4	Known interactor	RPS6KA1	SRF	Known interaction
ADAP1	Known interactor	CYCS	FDX1	Known interaction
ADIPOQ	Known interactor	HNRNPLL	PCBP1	Known interaction
ADRB2	Known interactor	MAPK1	RPS6KA1	Known interaction
AGO1	Known interactor	MAPK1	NCOA1	Known interaction
AGO2	Known interactor	ESR1	RPS6KA1	Known interaction
AHR	Known interactor	GRB2	RPS6KA1	Known interaction
AKAP9	Known interactor	ESR2	NCOA1	Known interaction
AKT1	Known interactor	NCOA1	VDR	Known interaction
ALG8	Known interactor	NCOA1	NKX2-1	Known interaction
ALKBH4	Known interactor	NCOA1	RXRA	Known interaction
ALX1	Known interactor	NCOA1	NR1I2	Known interaction
ANKRD11	Known interactor	NCOA1	RARB	Known interaction
ANKRD23	Known interactor	NCOA1	SUMO1	Known interaction
AP1M2	Known interactor	NCOA1	SMARCE1	Known interaction
AP2B1	Known interactor	NCOA1	TEAD2	Known interaction
AP3S1	Known interactor	NCOA1	TBP	Known interaction
AP5B1	Known interactor	NCOA1	STAT6	Known interaction
APBA1	Known interactor	NCOA1	THRB	Known interaction
APEX1	Known interactor	NCOA1	NFKB1	Known interaction
APH1A	Known interactor	NCOA1	PGR	Known interaction
APH1B	Known interactor	NCOA1	PPARA	Known interaction
APIP	Known interactor	NCOA1	NR2F6	Known interaction
APLP1	Known interactor	NCOA1	NR4A1	Known interaction
APOE	Known interactor	NCOA1	NR1I3	Known interaction
APOL3	Known interactor	NCOA1	NR3C1	Known interaction
APP	Known interactor	NCOA1	THRA	Known interaction
APPL2	Known interactor	NCOA1	RXRB	Known interaction
AQP1	Known interactor	GTF2B	NCOA1	Known interaction
AQP7	Known interactor	MAPT	PSEN1	Known interaction
AR	Known interactor	DDX5	NCOA1	Known interaction
ARAF	Known interactor	CCNB1	TSC1	Known interaction
ARF1	Known interactor	TSC1	YWHAQ	Known interaction
ARF6	Known interactor	TSC1	YWHAG	Known interaction
ARHGAP8	Known interactor	TSC1	YWHAB	Known interaction
ARHGDIA	Known interactor	TSC1	YWHAZ	Known interaction
ARHGEF11	Known interactor	HNRNPAB	YWHAG	Known interaction
ARHGEF12	Known interactor	CTNNBL1	STAMBP	Known interaction
ARID1A	Known interactor	MSN	TSC1	Known interaction
ARID4B	Known interactor	NR4A2	RPS6KA1	Known interaction
ARID5A	Known interactor	FER	IRS1	Known interaction
ARNT	Known interactor	NIF3L1	TRAF2	Known interaction
ARNTL	Known interactor	NIF3L1	TRIP13	Known interaction
ARPC3	Known interactor	NIF3L1	RPIA	Known interaction
ARPIN	Known interactor	NIF3L1	ZBED1	Known interaction
ARSF	Known interactor	NIF3L1	SNF8	Known interaction
ASAH1	Known interactor	KCNIP3	PSEN1	Known interaction
ASCC2	Known interactor	BRCA1	EP300	Known interaction
ASCL1	Known interactor	NRDC	POMC	Known interaction
ASH2L	Known interactor	SAP130	SMAD3	Known interaction
ATF4	Known interactor	DCP2	UPF1	Known interaction
ATF5	Known interactor	NOMO1	SHBG	Known interaction
ATF7IP	Known interactor	NOMO1	TOM1L1	Known interaction
ATM	Known interactor	KAT8	RNF2	Known interaction
ATP13A2	Known interactor	KAT8	KMT2A	Known interaction
ATP23	Known interactor	ALX1	EP300	Known interaction
ATR	Known interactor	ROR2	WNT5A	Known interaction
ATXN1	Known interactor	ARNT	EP300	Known interaction
ATXN2	Known interactor	HBEGF	NRDC	Known interaction
ATXN3	Known interactor	CDK1	USP16	Known interaction
AURKA	Known interactor	BCL2	PSEN1	Known interaction
AUTS2	Known interactor	MAP3K14	MAP3K8	Known interaction
BACE1	Known interactor	MAP3K8	TRAF2	Known interaction
BAD	Known interactor	MAP3K8	RELA	Known interaction
BAG3	Known interactor	MAP3K8	TRAF6	Known interaction
BAG6	Known interactor	ESRRA	NCOA1	Known interaction
BANP	Known interactor	CASP8	PSEN1	Known interaction
BARD1	Known interactor	CYP11B2	FDX1	Known interaction
BAZ2A	Known interactor	EXOSC10	USP16	Known interaction
BCAS2	Known interactor	EXOSC10	NOMO1	Known interaction
BCL2	Known interactor	CDX2	EP300	Known interaction
BCL2L1	Known interactor	DSC2	DSG1	Known interaction
BCL3	Known interactor	DSC2	DSG2	Known interaction
BCL6	Known interactor	DSC2	JUP	Known interaction
BDKRB2	Known interactor	CORO2B	TSC22D1	Known interaction
BECN1	Known interactor	CIITA	NCOA1	Known interaction
BEGAIN	Known interactor	CCL7	CCR1	Known interaction
BEND7	Known interactor	CALCA	NRDC	Known interaction
BEX2	Known interactor	DLL1	PSEN1	Known interaction
BEX3	Known interactor	DTX1	EP300	Known interaction
BHLHE40	Known interactor	GMFB	RPS6KA1	Known interaction
BLOC1S2	Known interactor	KRT15	KRT6A	Known interaction
BLZF1	Known interactor	AHR	NCOA1	Known interaction
BMPR2	Known interactor	AHR	EP300	Known interaction
BOLL	Known interactor	NFKB1	NFRKB	Known interaction
BRCA1	Known interactor	CREBBP	NCOA1	Known interaction
BRMS1	Known interactor	CREBBP	EP300	Known interaction
BSDC1	Known interactor	CCL14	CCR1	Known interaction
BTRC	Known interactor	CHUK	MAP3K8	Known interaction
BUD31	Known interactor	KCNQ3	KCNQ4	Known interaction
C11orf68	Known interactor	PDPK1	RPS6KA1	Known interaction
C14orf119	Known interactor	CASP1	PSEN1	Known interaction
C17orf50	Known interactor	CTBP1	EP300	Known interaction
C19orf18	Known interactor	CKAP4	PLAT	Known interaction
C1orf94	Known interactor	NEFL	TSC1	Known interaction
C1QTNF9	Known interactor	CTNNB1	EP300	Known interaction
C1R	Known interactor	NCSTN	PSEN1	Known interaction
CACNA1A	Known interactor	BAD	RPS6KA1	Known interaction
CALCA	Known interactor	CCND1	NCOA1	Known interaction
CALCOCO1	Known interactor	ATXN2	PLS3	Known interaction
CALCOCO2	Known interactor	CCDC85B	NIF3L1	Known interaction
CALM1	Known interactor	CCDC85B	KRT6A	Known interaction
CALM2	Known interactor	E2F5	EP300	Known interaction
CALM3	Known interactor	BCL6	EP300	Known interaction
CAPNS2	Known interactor	APEX1	EP300	Known interaction
CARD9	Known interactor	MAGI1	RPS6KA1	Known interaction
CARHSP1	Known interactor	AP3B2	ATM	Known interaction
CARM1	Known interactor	GSK3B	PSEN1	Known interaction
CASP1	Known interactor	CCL2	CCR1	Known interaction
CASP3	Known interactor	CASP3	PSEN1	Known interaction
CASP4	Known interactor	BAG6	EP300	Known interaction
CASP6	Known interactor	AGO1	DCP2	Known interaction
CASP7	Known interactor	RGS2	TSPAN15	Known interaction
CASP8	Known interactor	CITED2	EP300	Known interaction
CATIP	Known interactor	EMB	EP300	Known interaction
CBY2	Known interactor	MAGEA11	NIF3L1	Known interaction
CCDC102B	Known interactor	CRX	EP300	Known interaction
CCDC120	Known interactor	COPS5	NCOA1	Known interaction
CCDC183	Known interactor	HERPUD1	PSEN1	Known interaction
CCDC33	Known interactor	CTNNA1	PSEN1	Known interaction
CCDC57	Known interactor	BMPR2	MAP3K8	Known interaction
CCDC85B	Known interactor	FZD5	WNT5A	Known interaction
CCDC90B	Known interactor	FOS	NCOA1	Known interaction
CCL14	Known interactor	CCL8	CCR1	Known interaction
CCL15	Known interactor	APH1A	PSEN1	Known interaction
CCL16	Known interactor	CCL16	CCR1	Known interaction
CCL2	Known interactor	MAPK3	RPS6KA1	Known interaction
CCL23	Known interactor	MAP3K12	TSC22D1	Known interaction
CCL26	Known interactor	MAPRE2	NIF3L1	Known interaction
CCL28	Known interactor	NOTCH4	PSEN1	Known interaction
CCL3	Known interactor	GFAP	PSEN1	Known interaction
CCL3L1	Known interactor	ACTB	HNRNPAB	Known interaction
CCL4	Known interactor	CCL5	CCR1	Known interaction
CCL5	Known interactor	EID2	EP300	Known interaction
CCL7	Known interactor	CDK5	PSEN1	Known interaction
CCL8	Known interactor	APH1B	PSEN1	Known interaction
CCNB1	Known interactor	CTNND1	FER	Known interaction
CCND1	Known interactor	AKT1	EP300	Known interaction
CCND2	Known interactor	BCL3	NCOA1	Known interaction
CCNE1	Known interactor	DDX39B	HNRNPLL	Known interaction
CCR4	Known interactor	NFKBIA	RPS6KA1	Known interaction
CCR9	Known interactor	APP	PSEN1	Known interaction
CCT4	Known interactor	CASP4	PSEN1	Known interaction
CD40	Known interactor	CEBPB	EP300	Known interaction
CD74	Known interactor	ERN1	PSEN1	Known interaction
CD79A	Known interactor	AR	NCOA1	Known interaction
CDC42	Known interactor	AR	EP300	Known interaction
CDC5L	Known interactor	CALCOCO1	EP300	Known interaction
CDCA7L	Known interactor	FLNA	PSEN1	Known interaction
CDH1	Known interactor	CTTN	FER	Known interaction
CDK1	Known interactor	ICAM5	PSEN1	Known interaction
CDK2	Known interactor	NCLN	NOMO1	Known interaction
CDK4	Known interactor	METTL1	RPS6KA1	Known interaction
CDK5	Known interactor	RPTOR	WIPI2	Known interaction
CDK6	Known interactor	RPTOR	RRAGB	Known interaction
CDKN1B	Known interactor	RPTOR	RRAGA	Known interaction
CDKN2A	Known interactor	CCR1	MBP	Known interaction
CDKN2B	Known interactor	CCR1	PLP2	Known interaction
CDKN2C	Known interactor	CCR1	QSOX1	Known interaction
CDKN2D	Known interactor	CCR1	TPST1	Known interaction
CDSN	Known interactor	CCR1	CREB3	Known interaction
CDT1	Known interactor	CCR1	LETMD1	Known interaction
CDX2	Known interactor	CCR1	STAT3	Known interaction
CEBPA	Known interactor	CCR1	TMEFF1	Known interaction
CEBPB	Known interactor	CCR1	FAN1	Known interaction
CEBPD	Known interactor	CCR1	PRNP	Known interaction
CENPS-CORT	Known interactor	CCR1	TMX1	Known interaction
CEP57L1	Known interactor	CCR1	STAT1	Known interaction
CEP72	Known interactor	CCR1	GNA14	Known interaction
CFH	Known interactor	CCR1	JAK1	Known interaction
CFL1	Known interactor	CCR1	GRAMD1A	Known interaction
CHCHD2	Known interactor	CCR1	TPST2	Known interaction
CHD3	Known interactor	CCR1	CD74	Known interaction
CHD4	Known interactor	TSC22D1	ZC3HC1	Known interaction
CHORDC1	Known interactor	TSC22D1	WNK1	Known interaction
CHUK	Known interactor	TSC22D1	WIZ	Known interaction
CIB1	Known interactor	TSC22D1	UBE2D1	Known interaction
CIITA	Known interactor	TSC22D1	VIM	Known interaction
CILK1	Known interactor	TSC22D1	WDR73	Known interaction
CITED1	Known interactor	TSC22D1	UNC119	Known interaction
CITED2	Known interactor	POLR2G	TRAPPC2L	Known interaction
CITED4	Known interactor	TRAPPC2L	TRIP6	Known interaction
CKMT1A	Known interactor	TRAPPC2L	YPEL3	Known interaction
CKMT1B	Known interactor	TRAPPC2L	TRAPPC6B	Known interaction
CLK1	Known interactor	TRAPPC2L	TRAPPC3	Known interaction
CLOCK	Known interactor	TRAPPC2L	ZBTB42	Known interaction
CLTC	Known interactor	TRAPPC2L	TRAPPC4	Known interaction
CMC2	Known interactor	TRAPPC2L	TRAPPC3L	Known interaction
CNOT4	Known interactor	TRAPPC2L	TRAPPC6A	Known interaction
COG4	Known interactor	PTN	TSC22D1	Known interaction
COIL	Known interactor	SPINK1	TMPRSS15	Known interaction
COPS2	Known interactor	CCDC183	CTNNA3	Known interaction
COPS5	Known interactor	CTNNA3	NAB2	Known interaction
COPS6	Known interactor	CTNNA3	PNMA1	Known interaction
CORO2B	Known interactor	CTNNA3	ECSIT	Known interaction
CRCT1	Known interactor	CTNNA3	MSRA	Known interaction
CREB1	Known interactor	CTNNA3	HDX	Known interaction
CREB3	Known interactor	CTNNA3	SPATS1	Known interaction
CREBBP	Known interactor	CTNNA3	TNNI2	Known interaction
CREBZF	Known interactor	CTNNA3	TNNI1	Known interaction
CRK	Known interactor	CTNNA3	DISC1	Known interaction
CRMP1	Known interactor	CTNNA3	NDUFB7	Known interaction
CRX	Known interactor	CTNNA3	LASP1	Known interaction
CSNK1A1	Known interactor	CTNNA3	ZNF662	Known interaction
CSNK2A1	Known interactor	CTNNA3	FAM110A	Known interaction
CSNK2B	Known interactor	CTNNA3	TLX3	Known interaction
CSTF2	Known interactor	CTNNA3	POU6F2	Known interaction
CTBP1	Known interactor	CTNNA3	TASOR2	Known interaction
CTBP2	Known interactor	CTNNA3	MARCHF7	Known interaction
CTF1	Known interactor	CTNNA3	HOMEZ	Known interaction
CTNNA1	Known interactor	CTNNA3	ORC2	Known interaction
CTNNB1	Known interactor	CTNNA3	PNMA5	Known interaction
CTNND1	Known interactor	CTNNA3	REL	Known interaction
CTNND2	Known interactor	CTNNA3	TXNRD3	Known interaction
CTTN	Known interactor	CTNNA3	JUP	Known interaction
CUL2	Known interactor	CTNNA3	PAX6	Known interaction
CUL3	Known interactor	CTNNA3	PRR5	Known interaction
CUTC	Known interactor	CTNNA3	ZNF620	Known interaction
CWC15	Known interactor	CTNNA3	ZG16	Known interaction
CXADR	Known interactor	CTNNA3	EID2B	Known interaction
CXCL8	Known interactor	CTNNA3	MBD3L1	Known interaction
CXXC1	Known interactor	CTNNA3	USHBP1	Known interaction
CYB5R3	Known interactor	CTNNA3	ZNF426	Known interaction
CYCS	Known interactor	CTNNA3	FBXO28	Known interaction
CYP11A1	Known interactor	CTNNA3	KATNAL1	Known interaction
CYP11B2	Known interactor	CTNNA3	RIPPLY1	Known interaction
CYP2C18	Known interactor	CTNNA3	TRIM54	Known interaction
CYP2C8	Known interactor	CTNNA3	FERD3L	Known interaction
CYRIB	Known interactor	CTNNA3	STMN2	Known interaction
DAB1	Known interactor	CTNNA3	GNB1	Known interaction
DAO	Known interactor	CTNNA3	PPARA	Known interaction
DBP	Known interactor	CTNNA3	ZNF474	Known interaction
DCDC2	Known interactor	CTNNA3	FAM9A	Known interaction
DCP1A	Known interactor	CTNNA3	ZNF19	Known interaction
DCP1B	Known interactor	CTNNA3	OIP5	Known interaction
DCTD	Known interactor	CTNNA3	SERTAD2	Known interaction
DCTN1	Known interactor	CTNNA3	FAM161A	Known interaction
DCTPP1	Known interactor	CTNNA3	VIP	Known interaction
DDAH2	Known interactor	CTNNA3	PLAGL2	Known interaction
DDI1	Known interactor	CTNNA3	GINS3	Known interaction
DDIT3	Known interactor	CTNNA3	ZNF552	Known interaction
DDX17	Known interactor	CTNNA3	RPS6KA5	Known interaction
DDX24	Known interactor	CTNNA3	MYOG	Known interaction
DDX39A	Known interactor	CTNNA3	FAM161B	Known interaction
DDX39B	Known interactor	CTNNA3	EPS8	Known interaction
DDX5	Known interactor	EIF4EBP2	RPTOR	Known interaction
DECR2	Known interactor	HSPB1	NAP1L1	Known interaction
DEDD2	Known interactor	NAP1L1	TERF1	Known interaction
DEK	Known interactor	NAP1L1	SP1	Known interaction
DEPTOR	Known interactor	NAP1L1	SUMO2	Known interaction
DHPS	Known interactor	NAP1L1	RPL23A	Known interaction
DISC1	Known interactor	NAP1L1	NR2F6	Known interaction
DKK1	Known interactor	NAP1L1	TP53	Known interaction
DLC1	Known interactor	NAP1L1	NAP1L2	Known interaction
DLG4	Known interactor	NAP1L1	TPX2	Known interaction
DLL1	Known interactor	NAP1L1	POT1	Known interaction
DLST	Known interactor	NAP1L1	RPS15	Known interaction
DMC1	Known interactor	CYP11A1	FDX1	Known interaction
DMRT3	Known interactor	FDX1	PRKAB2	Known interaction
DMRTB1	Known interactor	FDX1	FDXR	Known interaction
DNMT3B	Known interactor	TAF5L	TSC22D1	Known interaction
DOCK3	Known interactor	LINC00839	RPTOR	Known interaction
DOK5	Known interactor	OIT3	VAC14	Known interaction
DSG1	Known interactor	NEUROD4	PIN1	Known interaction
DSG2	Known interactor	NEUROD4	TCF4	Known interaction
DSP	Known interactor	FBXL12	PSEN1	Known interaction
DTNBP1	Known interactor	PSEN1	RAD23A	Known interaction
DTX1	Known interactor	PSEN1	PSMB1	Known interaction
DTX2	Known interactor	PSEN1	TDP2	Known interaction
DUSP23	Known interactor	PSEN1	STAMBPL1	Known interaction
DUSP29	Known interactor	PSEN1	PSMA5	Known interaction
DUX4	Known interactor	PSEN1	RYR2	Known interaction
DUXAP9	Known interactor	PSEN1	RNF32	Known interaction
DYNLT3	Known interactor	PSEN1	RHEB	Known interaction
DYRK2	Known interactor	PSEN1	RAB3A	Known interaction
E2F1	Known interactor	PSEN1	UMPS	Known interaction
E2F5	Known interactor	PSEN1	RMDN3	Known interaction
EBP	Known interactor	PSEN1	ST13	Known interaction
ECSIT	Known interactor	PSEN1	SLC10A6	Known interaction
ECT2	Known interactor	PSEN1	TUBA1B	Known interaction
EED	Known interactor	PSEN1	SCAF11	Known interaction
EEF1A1	Known interactor	PSEN1	SCN1A	Known interaction
EEF1D	Known interactor	CTNND2	PSEN1	Known interaction
EEF2	Known interactor	ARSF	EP300	Known interaction
EEF2K	Known interactor	EP300	PPARD	Known interaction
EFHC2	Known interactor	EP300	TRAF2	Known interaction
EFHD1	Known interactor	EP300	PAXIP1	Known interaction
EFNB2	Known interactor	EP300	H1-3	Known interaction
EGFR	Known interactor	EP300	MTOR	Known interaction
EGR1	Known interactor	EP300	H4C9	Known interaction
EID1	Known interactor	EP300	H4C14	Known interaction
EID2	Known interactor	EP300	HERC1	Known interaction
EID2B	Known interactor	EP300	POLD2	Known interaction
EIF4A3	Known interactor	EP300	NPAS2	Known interaction
EIF4EBP1	Known interactor	EP300	MCM3	Known interaction
EIF4EBP2	Known interactor	EP300	SPIB	Known interaction
EIF5A2	Known interactor	EP300	PLG	Known interaction
ELAVL2	Known interactor	EP300	HOXB1	Known interaction
ELF3	Known interactor	EP300	NBN	Known interaction
ELK1	Known interactor	EP300	UBQLN1	Known interaction
ELL	Known interactor	EP300	SNAI1	Known interaction
EMB	Known interactor	EP300	LEF1	Known interaction
ENKD1	Known interactor	EP300	KLF1	Known interaction
ENOX1	Known interactor	EP300	H3-3A	Known interaction
ENSA	Known interactor	EP300	ZFPM2	Known interaction
EPAS1	Known interactor	EP300	STAT2	Known interaction
EPB41L3	Known interactor	EP300	FOSL2	Known interaction
EPHB3	Known interactor	EP300	REL	Known interaction
EPHB6	Known interactor	EP300	H2AC21	Known interaction
EPO	Known interactor	EP300	HNF1A	Known interaction
EPS8	Known interactor	EP300	JUND	Known interaction
ERBB2	Known interactor	EP300	NOXA1	Known interaction
ERBB3	Known interactor	EP300	ZC3H12A	Known interaction
ERBIN	Known interactor	EP300	SIRT2	Known interaction
ERCC6	Known interactor	EP300	GRIP1	Known interaction
ERG	Known interactor	EP300	SETD1A	Known interaction
ERG28	Known interactor	EP300	NEIL2	Known interaction
ERGIC3	Known interactor	EP300	SS18	Known interaction
ERN1	Known interactor	EP300	POLI	Known interaction
ESR1	Known interactor	EP300	USF2	Known interaction
ESR2	Known interactor	EP300	IRF1	Known interaction
ESRRA	Known interactor	EP300	PELP1	Known interaction
ESRRG	Known interactor	EP300	MAX	Known interaction
ETFA	Known interactor	EP300	RACK1	Known interaction
ETS1	Known interactor	EP300	MCM3AP	Known interaction
ETS2	Known interactor	EP300	MN1	Known interaction
ETV1	Known interactor	EP300	KLF2	Known interaction
ETV4	Known interactor	EP300	FHL2	Known interaction
EXOSC10	Known interactor	EP300	ZBTB16	Known interaction
EZH2	Known interactor	EP300	HMGN1	Known interaction
EZR	Known interactor	EP300	RPS6KA5	Known interaction
F2RL1	Known interactor	EP300	IRF7	Known interaction
FAF1	Known interactor	EP300	HOXA10	Known interaction
FAM110A	Known interactor	EP300	SET	Known interaction
FAM161A	Known interactor	EP300	ILF2	Known interaction
FAM161B	Known interactor	EP300	NCOA2	Known interaction
FAM20C	Known interactor	EP300	THPO	Known interaction
FAM222B	Known interactor	EP300	GATA2	Known interaction
FAM9A	Known interactor	EP300	PRKCB	Known interaction
FAM9B	Known interactor	EP300	HEMGN	Known interaction
FAN1	Known interactor	EP300	MAP3K5	Known interaction
FBN3	Known interactor	EP300	SERTAD1	Known interaction
FBXL12	Known interactor	EP300	MAF	Known interaction
FBXL5	Known interactor	EP300	TERF2	Known interaction
FBXO11	Known interactor	EP300	ETV4	Known interaction
FBXO25	Known interactor	EP300	PPP2R5C	Known interaction
FBXO28	Known interactor	EP300	MAPK1	Known interaction
FBXO34	Known interactor	EP300	SUMO2	Known interaction
FBXW7	Known interactor	EP300	SPHK1	Known interaction
FDXR	Known interactor	EP300	HBP1	Known interaction
FEN1	Known interactor	EP300	NFYB	Known interaction
FERD3L	Known interactor	EP300	NFATC1	Known interaction
FGF13	Known interactor	EP300	KPNA2	Known interaction
FGFR1	Known interactor	EP300	HPS6	Known interaction
FGFR4	Known interactor	EP300	ORC2	Known interaction
FHL2	Known interactor	EP300	SUV39H1	Known interaction
FKBP7	Known interactor	EP300	FOXP3	Known interaction
FLAD1	Known interactor	EP300	HDAC1	Known interaction
FLNA	Known interactor	EP300	HOXB4	Known interaction
FLNB	Known interactor	EP300	NAP1L4	Known interaction
FOS	Known interactor	EP300	SS18L1	Known interaction
FOSB	Known interactor	EP300	MAML1	Known interaction
FOSL1	Known interactor	EP300	FOSB	Known interaction
FOSL2	Known interactor	EP300	HSP90AA2P	Known interaction
FOXA2	Known interactor	EP300	SP1	Known interaction
FOXH1	Known interactor	EP300	WDR59	Known interaction
FOXO1	Known interactor	EP300	HOXD10	Known interaction
FOXO3	Known interactor	EP300	ZBTB48	Known interaction
FOXP3	Known interactor	EP300	TAF1B	Known interaction
FRS3	Known interactor	EP300	PRKDC	Known interaction
FSD1	Known interactor	EP300	JMY	Known interaction
FSD2	Known interactor	EP300	PIAS3	Known interaction
FXR2	Known interactor	EP300	MSH6	Known interaction
FZD1	Known interactor	EP300	H2BC21	Known interaction
FZD5	Known interactor	EP300	ING5	Known interaction
G6PC1	Known interactor	EP300	GRB2	Known interaction
GAA	Known interactor	EP300	HNRNPUL1	Known interaction
GABPA	Known interactor	EP300	PIN1	Known interaction
GABRB1	Known interactor	EP300	ZBTB7B	Known interaction
GAPDH	Known interactor	EP300	PRMT1	Known interaction
GAS2L2	Known interactor	EP300	ITIH3	Known interaction
GATA2	Known interactor	EP300	KLF13	Known interaction
GATA4	Known interactor	EP300	PLSCR2	Known interaction
GATA5	Known interactor	EP300	JUNB	Known interaction
GATA6	Known interactor	EP300	MCM5	Known interaction
GBP2	Known interactor	EP300	SREBF1	Known interaction
GCDH	Known interactor	EP300	H1-1	Known interaction
GCKR	Known interactor	EP300	H3-4	Known interaction
GDI1	Known interactor	EP300	NR1I2	Known interaction
GEM	Known interactor	EP300	SKP2	Known interaction
GFAP	Known interactor	EP300	UBTF	Known interaction
GINS3	Known interactor	EP300	FBXL5	Known interaction
GJA8	Known interactor	EP300	STAT5B	Known interaction
GJB2	Known interactor	EP300	IRF5	Known interaction
GLIS2	Known interactor	EP300	JDP2	Known interaction
GLUL	Known interactor	EP300	MORF4L1	Known interaction
GMFB	Known interactor	EP300	KAT5	Known interaction
GNA14	Known interactor	EP300	GLUL	Known interaction
GNB1	Known interactor	EP300	XRCC6	Known interaction
GNB2	Known interactor	EP300	NPM1	Known interaction
GNB5	Known interactor	EP300	PCK2	Known interaction
GNMT	Known interactor	EP300	PLSCR1	Known interaction
GOLGA2	Known interactor	EP300	MRE11	Known interaction
GOPC	Known interactor	EP300	TRERF1	Known interaction
GORASP1	Known interactor	EP300	H3C14	Known interaction
GORASP2	Known interactor	EP300	TINAGL1	Known interaction
GPANK1	Known interactor	EP300	VPS18	Known interaction
GPBP1	Known interactor	EP300	MAPK8	Known interaction
GPR152	Known interactor	EP300	TP53BP1	Known interaction
GPR42	Known interactor	EP300	SENP3	Known interaction
GPS1	Known interactor	EP300	H4-16	Known interaction
GPS2	Known interactor	EP300	RECQL4	Known interaction
GPX8	Known interactor	EP300	FEN1	Known interaction
GRAMD1A	Known interactor	EP300	NEDD1	Known interaction
GRB2	Known interactor	EP300	MAGED1	Known interaction
GRB7	Known interactor	EP300	GOLGA2	Known interaction
GRID2IP	Known interactor	EP300	HOXB7	Known interaction
GRIP1	Known interactor	EP300	JUN	Known interaction
GSK3B	Known interactor	EP300	TAL1	Known interaction
GTF2B	Known interactor	EP300	HOXB3	Known interaction
GUCY1A1	Known interactor	EP300	ILF3	Known interaction
GUCY1B1	Known interactor	EP300	RUVBL2	Known interaction
GYPC	Known interactor	EP300	KAT2A	Known interaction
H1-1	Known interactor	EP300	ZBTB49	Known interaction
H1-3	Known interactor	EP300	ETS2	Known interaction
H2AC18	Known interactor	EP300	KDM2A	Known interaction
H2AC20	Known interactor	EP300	HOXB2	Known interaction
H2AC21	Known interactor	EP300	H2BC3	Known interaction
H2AC4	Known interactor	EP300	RPS6KB2	Known interaction
H2AZ1	Known interactor	EP300	MGMT	Known interaction
H2BC21	Known interactor	EP300	MPG	Known interaction
H2BC3	Known interactor	EP300	RPL27	Known interaction
H3-3A	Known interactor	EP300	ESR2	Known interaction
H3-4	Known interactor	EP300	OLIG2	Known interaction
H3C1	Known interactor	EP300	ETS1	Known interaction
H3C14	Known interactor	EP300	TCF12	Known interaction
H4-16	Known interactor	EP300	GATA5	Known interaction
H4C1	Known interactor	EP300	TWIST1	Known interaction
H4C14	Known interactor	EP300	GCKR	Known interaction
H4C9	Known interactor	EP300	EPO	Known interaction
HAMP	Known interactor	EP300	PAX5	Known interaction
HAND2	Known interactor	EP300	GTF2B	Known interaction
HBA1	Known interactor	EP300	TNIP2	Known interaction
HBEGF	Known interactor	EP300	HOXB6	Known interaction
HBP1	Known interactor	EP300	PPARG	Known interaction
HDAC1	Known interactor	EP300	GPS2	Known interaction
HDAC3	Known interactor	EP300	MSTO1	Known interaction
HDAC6	Known interactor	EP300	H4C1	Known interaction
HDX	Known interactor	EP300	MCL1	Known interaction
HEMGN	Known interactor	EP300	NUPR1	Known interaction
HERC1	Known interactor	EP300	MCM2	Known interaction
HERPUD1	Known interactor	EP300	PAX8	Known interaction
HGS	Known interactor	EP300	WDR82	Known interaction
HIF1A	Known interactor	EP300	KRT18	Known interaction
HMGA1	Known interactor	EP300	FOSL1	Known interaction
HMGB1	Known interactor	EP300	H2AC20	Known interaction
HMGB2	Known interactor	EP300	PRKCA	Known interaction
HMGN1	Known interactor	EP300	PRKCD	Known interaction
HMGN2	Known interactor	EP300	TP73	Known interaction
HMGXB4	Known interactor	EP300	TGS1	Known interaction
HNF1A	Known interactor	EP300	PIAS1	Known interaction
HNF4A	Known interactor	EP300	IMMT	Known interaction
HNF4G	Known interactor	EP300	ZRANB2	Known interaction
HNRNPK	Known interactor	EP300	MCM4	Known interaction
HNRNPU	Known interactor	EP300	SELENOP	Known interaction
HNRNPUL1	Known interactor	EP300	NCOA6	Known interaction
HOMEZ	Known interactor	EP300	STAT1	Known interaction
HOOK2	Known interactor	EP300	ZBTB8A	Known interaction
HOXA1	Known interactor	EP300	GABPA	Known interaction
HOXA10	Known interactor	EP300	MAPT	Known interaction
HOXB1	Known interactor	EP300	RUNX1	Known interaction
HOXB2	Known interactor	EP300	HOXD4	Known interaction
HOXB3	Known interactor	EP300	TCF4	Known interaction
HOXB4	Known interactor	EP300	TRIP4	Known interaction
HOXB6	Known interactor	EP300	SATB1	Known interaction
HOXB7	Known interactor	EP300	POLB	Known interaction
HOXB9	Known interactor	EP300	SNW1	Known interaction
HOXC13	Known interactor	EP300	KAT2B	Known interaction
HOXC8	Known interactor	EP300	PAK2	Known interaction
HOXD10	Known interactor	EP300	RAN	Known interaction
HOXD4	Known interactor	EP300	H2AC4	Known interaction
HPS6	Known interactor	EP300	GATA4	Known interaction
HR	Known interactor	EP300	SAV1	Known interaction
HSF2BP	Known interactor	EP300	KCTD5	Known interaction
HSH2D	Known interactor	EP300	NFATC2	Known interaction
HSP90AA2P	Known interactor	EP300	SMAD5	Known interaction
HSPB1	Known interactor	EP300	PDHX	Known interaction
HTRA1	Known interactor	EP300	MDM4	Known interaction
ICAM5	Known interactor	EP300	HDAC6	Known interaction
IFIT3	Known interactor	EP300	IRF2	Known interaction
IFT20	Known interactor	EP300	GPBP1	Known interaction
IGFN1	Known interactor	EP300	RUNX2	Known interaction
IK	Known interactor	EP300	UBE2D1	Known interaction
IKBKB	Known interactor	EP300	UBC	Known interaction
IKZF3	Known interactor	EP300	NR1H4	Known interaction
IL7R	Known interactor	EP300	PLAGL1	Known interaction
ILF2	Known interactor	EP300	HMGB1	Known interaction
ILF3	Known interactor	EP300	MEF2C	Known interaction
IMMT	Known interactor	EP300	RPS6KB1	Known interaction
INCA1	Known interactor	EP300	KLF4	Known interaction
ING1	Known interactor	EP300	YWHAZ	Known interaction
ING2	Known interactor	EP300	H3C1	Known interaction
ING4	Known interactor	EP300	SRY	Known interaction
ING5	Known interactor	EP300	GAA	Known interaction
IP6K3	Known interactor	EP300	MYOD1	Known interaction
IRF1	Known interactor	EP300	MYB	Known interaction
IRF2	Known interactor	EP300	HDAC3	Known interaction
IRF3	Known interactor	MAST2	RPS6KA1	Known interaction
IRF5	Known interactor	RPS6KA1	SYK	Known interaction
IRF7	Known interactor	RPS6KA1	RPTOR	Known interaction
IRS1	Known interactor	RPS6KA1	YBX1	Known interaction
IRS2	Known interactor	RPS6KA1	VCP	Known interaction
ITIH3	Known interactor	RPS6KA1	WHRN	Known interaction
ITSN2	Known interactor	RPS6KA1	SHROOM2	Known interaction
JAK1	Known interactor	RPS6KA1	SNX27	Known interaction
JDP2	Known interactor	RPS6KA1	TP53	Known interaction
JMY	Known interactor	RPS6KA1	SNTG2	Known interaction
JUN	Known interactor	RPS6KA1	SRSF5	Known interaction
JUNB	Known interactor	RPS6KA1	UBE2T	Known interaction
JUND	Known interactor	RPS6KA1	SNTA1	Known interaction
JUP	Known interactor	RPS6KA1	SHANK3	Known interaction
KANK2	Known interactor	RPS6KA1	TOB2	Known interaction
KANSL1	Known interactor	RPS6KA1	TTK	Known interaction
KAT2A	Known interactor	RPS6KA1	YWHAB	Known interaction
KAT2B	Known interactor	RPS6KA1	SLC9A3R2	Known interaction
KAT5	Known interactor	RPS6KA1	TAMALIN	Known interaction
KATNAL1	Known interactor	RPS6KA1	TSC2	Known interaction
KCNIP1	Known interactor	RPS6KA1	SYNJ2BP	Known interaction
KCNIP3	Known interactor	RPS6KA1	SNTB1	Known interaction
KCNIP4	Known interactor	C1R	EP300	Known interaction
KCNQ2	Known interactor	CYGB	LRATD1	Known interaction
KCNQ4	Known interactor	CYGB	PRR5-ARHGAP8	Known interaction
KCNQ5	Known interactor	CYGB	DDI1	Known interaction
KCTD17	Known interactor	CYGB	MZT1	Known interaction
KCTD4	Known interactor	HNRNPLL	KHDRBS2	Known interaction
KCTD5	Known interactor	HNRNPLL	PNMA1	Known interaction
KCTD7	Known interactor	HNRNPLL	SSX2IP	Known interaction
KCTD9	Known interactor	HNRNPLL	PAXIP1	Known interaction
KDM1A	Known interactor	HNRNPLL	TMCC2	Known interaction
KDM2A	Known interactor	HNRNPLL	RBM10	Known interaction
KHDRBS2	Known interactor	HNRNPLL	TRIM27	Known interaction
KIFC3	Known interactor	HNRNPLL	KRTAP10-3	Known interaction
KLF1	Known interactor	HNRNPLL	MID2	Known interaction
KLF13	Known interactor	HNRNPLL	MDFI	Known interaction
KLF2	Known interactor	HNRNPLL	TADA2A	Known interaction
KLF4	Known interactor	HNRNPLL	UBE2I	Known interaction
KLF5	Known interactor	HNRNPLL	MAGED1	Known interaction
KMT2A	Known interactor	HNRNPLL	TRIM23	Known interaction
KMT2B	Known interactor	HNRNPLL	SUMO2	Known interaction
KMT2C	Known interactor	HNRNPLL	SRSF11	Known interaction
KPNA2	Known interactor	HNRNPLL	KRT31	Known interaction
KRT13	Known interactor	HNRNPLL	RBPMS	Known interaction
KRT15	Known interactor	HNRNPLL	KRT40	Known interaction
KRT16	Known interactor	HNRNPLL	VAC14	Known interaction
KRT17	Known interactor	HNRNPLL	THAP1	Known interaction
KRT18	Known interactor	HNRNPLL	REL	Known interaction
KRT19	Known interactor	HNRNPLL	RHOXF2	Known interaction
KRT25	Known interactor	HNRNPLL	TLE5	Known interaction
KRT26	Known interactor	HNRNPLL	SPRY2	Known interaction
KRT27	Known interactor	HNRNPLL	SKIL	Known interaction
KRT28	Known interactor	HNRNPLL	IKZF3	Known interaction
KRT31	Known interactor	MTOR	RPS6KA1	Known interaction
KRT34	Known interactor	MTOR	RPTOR	Known interaction
KRT35	Known interactor	TP53	TSC22D1	Known interaction
KRT36	Known interactor	REL	TRAPPC2L	Known interaction
KRT38	Known interactor	MITF	RPS6KA1	Known interaction
KRT40	Known interactor	HNF1A	NCOA1	Known interaction
KRTAP10-3	Known interactor	MCM3AP	TSC22D1	Known interaction
KRTAP11-1	Known interactor	TCF7L2	TSC1	Known interaction
KXD1	Known interactor	MAPK1	RPTOR	Known interaction
L1CAM	Known interactor	FOXP3	KAT8	Known interaction
LAMTOR3	Known interactor	MAP2K1	MAP3K8	Known interaction
LASP1	Known interactor	NR4A1	RPS6KA1	Known interaction
LATS2	Known interactor	ESR1	NCOA1	Known interaction
LCE1C	Known interactor	GRB2	NIF3L1	Known interaction
LCE1F	Known interactor	GRB2	KIAA0408	Known interaction
LCE3A	Known interactor	H1-1	NAP1L1	Known interaction
LCN2	Known interactor	H3-4	KDM3B	Known interaction
LDOC1	Known interactor	H3-4	HNRNPAB	Known interaction
LEF1	Known interactor	H3C14	NRDC	Known interaction
LENG1	Known interactor	H4-16	USP16	Known interaction
LETMD1	Known interactor	GOLGA2	KRT6A	Known interaction
LGALS14	Known interactor	MYC	TSC1	Known interaction
LHX2	Known interactor	MYC	SAP130	Known interaction
LIMK2	Known interactor	ETV1	RPS6KA1	Known interaction
LINC00839	Known interactor	JUN	NCOA1	Known interaction
LINC01554	Known interactor	KAT2A	TSC1	Known interaction
LMNA	Known interactor	H2BC3	USP16	Known interaction
LMO2	Known interactor	NCOA1	PPARD	Known interaction
LMO3	Known interactor	NCOA1	PRMT1	Known interaction
LNX1	Known interactor	NCOA1	NR3C2	Known interaction
LRATD1	Known interactor	NCOA1	PPARG	Known interaction
LRIF1	Known interactor	NCOA1	PPARGC1A	Known interaction
LRRN2	Known interactor	NCOA1	NR1H2	Known interaction
LUC7L	Known interactor	NCOA1	YWHAQ	Known interaction
LY6E	Known interactor	NCOA1	STAT3	Known interaction
MAF	Known interactor	NCOA1	NR1H3	Known interaction
MAGEA11	Known interactor	NCOA1	PAGR1	Known interaction
MAGEB4	Known interactor	NCOA1	RARG	Known interaction
MAGED1	Known interactor	NCOA1	RORB	Known interaction
MAGI1	Known interactor	NCOA1	TP53	Known interaction
MAGI2	Known interactor	NCOA1	YWHAH	Known interaction
MAGI3	Known interactor	NCOA1	SRF	Known interaction
MAML1	Known interactor	NCOA1	TRIP4	Known interaction
MAP2K1	Known interactor	NCOA1	SNW1	Known interaction
MAP2K4	Known interactor	NCOA1	RARA	Known interaction
MAP2K5	Known interactor	NCOA1	TRIM27	Known interaction
MAP3K12	Known interactor	NCOA1	NR5A2	Known interaction
MAP3K14	Known interactor	NCOA1	SMARCC1	Known interaction
MAP3K5	Known interactor	NCOA1	PSMB9	Known interaction
MAPK1	Known interactor	NCOA1	NR1H4	Known interaction
MAPK14	Known interactor	NCOA1	NCOR1	Known interaction
MAPK3	Known interactor	NCOA1	RORA	Known interaction
MAPK8	Known interactor	NCOA1	TEAD1	Known interaction
MAPK8IP2	Known interactor	NCOA1	NR2F1	Known interaction
MAPK9	Known interactor	NCOA1	NR5A1	Known interaction
MAPRE2	Known interactor	NCOA1	PRMT2	Known interaction
MAPT	Known interactor	NCOA1	NR6A1	Known interaction
MARCHF7	Known interactor	NOTCH1	PSEN1	Known interaction
MARK4	Known interactor	H4C1	NAP1L1	Known interaction
MAST1	Known interactor	H4C1	KAT8	Known interaction
MAST2	Known interactor	KRT18	KRT6A	Known interaction
MAX	Known interactor	HIF1A	NCOA1	Known interaction
MBD3L1	Known interactor	H2AC20	USP16	Known interaction
MBP	Known interactor	MAPT	RPS6KA1	Known interaction
MCL1	Known interactor	TCF4	TRAPPC2L	Known interaction
MCM2	Known interactor	KAT2B	NCOA1	Known interaction
MCM3	Known interactor	H2AC4	USP16	Known interaction
MCM3AP	Known interactor	UBC	USP16	Known interaction
MCM4	Known interactor	HMGB1	PSEN1	Known interaction
MCM5	Known interactor	RPS6KB1	RPTOR	Known interaction
MDC1	Known interactor	H3C1	HNRNPAB	Known interaction
MDFI	Known interactor	H3C1	NAP1L1	Known interaction
MDM2	Known interactor	CHORDC1	NAP1L1	Known interaction
MDM4	Known interactor	DTNBP1	KIAA0408	Known interaction
MED10	Known interactor	KIAA0408	TEX11	Known interaction
MED4	Known interactor	KIAA0408	TRIM63	Known interaction
MEF2A	Known interactor	KIAA0408	TRAF2	Known interaction
MEF2C	Known interactor	KIAA0408	PHF1	Known interaction
MEF2D	Known interactor	KIAA0408	MDFI	Known interaction
MEI4	Known interactor	KIAA0408	SORBS3	Known interaction
MEOX1	Known interactor	KIAA0408	YWHAG	Known interaction
MEOX2	Known interactor	KIAA0408	TRIM37	Known interaction
METTL1	Known interactor	KIAA0408	KRT15	Known interaction
METTL2B	Known interactor	KIAA0408	SFN	Known interaction
MFSD4B	Known interactor	KIAA0408	TLE1	Known interaction
MGMT	Known interactor	KIAA0408	NCK2	Known interaction
MID1	Known interactor	KIAA0408	NDOR1	Known interaction
MID2	Known interactor	KIAA0408	RUNX1T1	Known interaction
MIR15B	Known interactor	KIAA0408	PFDN1	Known interaction
MITF	Known interactor	KIAA0408	MYO15B	Known interaction
MLH1	Known interactor	KIAA0408	UBASH3A	Known interaction
MLST8	Known interactor	KIAA0408	POLR3C	Known interaction
MLXIPL	Known interactor	KIAA0408	PRMT6	Known interaction
MN1	Known interactor	KIAA0408	PIK3R3	Known interaction
MORF4L1	Known interactor	KIAA0408	VIM	Known interaction
MPG	Known interactor	KIAA0408	MAGEA11	Known interaction
MPP1	Known interactor	KIAA0408	TRIM55	Known interaction
MRE11	Known interactor	KIAA0408	ZDHHC17	Known interaction
MSH6	Known interactor	KIAA0408	XRCC6	Known interaction
MSL3	Known interactor	DDX5	EP300	Known interaction
MSN	Known interactor	CCNB1	EP300	Known interaction
MSRA	Known interactor	TSC1	TSHZ3	Known interaction
MSTO1	Known interactor	TSC1	ZNF587	Known interaction
MTCH1	Known interactor	TSC1	VEZF1	Known interaction
MTNR1A	Known interactor	TSC1	YWHAH	Known interaction
MTOR	Known interactor	TSC1	VGLL3	Known interaction
MTUS2	Known interactor	TSC1	ZNF765	Known interaction
MVP	Known interactor	TSC1	YPEL3	Known interaction
MXD1	Known interactor	TSC1	ZNF417	Known interaction
MYB	Known interactor	TSC1	VENTX	Known interaction
MYBL2	Known interactor	TSC1	ZIC1	Known interaction
MYC	Known interactor	TSC1	VPS37C	Known interaction
MYLIP	Known interactor	TSC1	TSGA10IP	Known interaction
MYO15B	Known interactor	TSC1	TSC2	Known interaction
MYOD1	Known interactor	TSC1	YWHAE	Known interaction
MYOG	Known interactor	ERG	HNRNPAB	Known interaction
MYOZ3	Known interactor	HNRNPAB	PTBP1	Known interaction
MZT1	Known interactor	HNRNPAB	IL7R	Known interaction
N4BP2	Known interactor	HNRNPAB	POLR3D	Known interaction
NAB2	Known interactor	HNRNPAB	TP63	Known interaction
NAGK	Known interactor	HNRNPAB	HOXC13	Known interaction
NAP1L2	Known interactor	HNRNPAB	PTBP2	Known interaction
NAP1L4	Known interactor	HNRNPAB	PTEN	Known interaction
NATD1	Known interactor	HNRNPAB	USP19	Known interaction
NBN	Known interactor	HNRNPAB	HOXD4	Known interaction
NCALD	Known interactor	HNRNPAB	RBFOX2	Known interaction
NCK2	Known interactor	CTNNBL1	SUMO2	Known interaction
NCLN	Known interactor	CTNNBL1	LUC7L	Known interaction
NCOA2	Known interactor	CTNNBL1	WBP11	Known interaction
NCOA3	Known interactor	CTNNBL1	LDOC1	Known interaction
NCOA5	Known interactor	CTNNBL1	SPP1	Known interaction
NCOA6	Known interactor	CTNNBL1	PRPF3	Known interaction
NCOR1	Known interactor	CTNNBL1	MED4	Known interaction
NCSTN	Known interactor	CTNNBL1	PPP1R8	Known interaction
NDOR1	Known interactor	CTNNBL1	MEOX2	Known interaction
NDUFB7	Known interactor	CTNNBL1	HMGB1	Known interaction
NEDD1	Known interactor	CTNNBL1	ZCCHC10	Known interaction
NEDD4	Known interactor	CTNNBL1	NSRP1	Known interaction
NEFL	Known interactor	CTNNBL1	HNRNPK	Known interaction
NEIL2	Known interactor	CTNNBL1	MAPK8IP2	Known interaction
NEK6	Known interactor	CTNNBL1	CWC15	Known interaction
NEUROD1	Known interactor	CTNNBL1	IK	Known interaction
NF2	Known interactor	CTNNBL1	PRDM4	Known interaction
NFATC1	Known interactor	CTNNBL1	SRPK2	Known interaction
NFATC2	Known interactor	CTNNBL1	U2SURP	Known interaction
NFKB1	Known interactor	MEOX2	TRAPPC2L	Known interaction
NFKB2	Known interactor	MEOX2	OIT3	Known interaction
NFKBIA	Known interactor	HNRNPK	HNRNPLL	Known interaction
NFYB	Known interactor	CAPNS2	OXNAD1	Known interaction
NGB	Known interactor	C17orf50	CTNNA3	Known interaction
NKG7	Known interactor	FGFR1	RPS6KA1	Known interaction
NKX2-1	Known interactor	DSP	KRT6A	Known interaction
NKX3-1	Known interactor	KRT6A	TSGA10	Known interaction
NLGN3	Known interactor	KRT6A	WASHC3	Known interaction
NME1	Known interactor	KRT6A	TFIP11	Known interaction
NME7	Known interactor	KRT6A	NCALD	Known interaction
NOL3	Known interactor	KRT6A	MTUS2	Known interaction
NOS3	Known interactor	KRT6A	TCHP	Known interaction
NOTCH1	Known interactor	KRT6A	SMARCB1	Known interaction
NOTCH2	Known interactor	KRT6A	TRIM23	Known interaction
NOTCH3	Known interactor	KRT6A	TRIM54	Known interaction
NOTCH4	Known interactor	KRT6A	LMNA	Known interaction
NOXA1	Known interactor	KRT6A	TXLNB	Known interaction
NPAS2	Known interactor	KRT6A	SGTA	Known interaction
NPM1	Known interactor	KRT6A	UBQLN2	Known interaction
NPTXR	Known interactor	KRT6A	NUP62	Known interaction
NR1H2	Known interactor	KIAA0586	UBC	Known interaction
NR1H3	Known interactor	KIAA0586	TSC22D2	Known interaction
NR1H4	Known interactor	CASP6	PSEN1	Known interaction
NR1I2	Known interactor	SOX4	TSC1	Known interaction
NR1I3	Known interactor	HOXA1	OIT3	Known interaction
NR2F1	Known interactor	PRAM1	PSEN1	Known interaction
NR2F2	Known interactor	MFSD6	SLC18A1	Known interaction
NR2F6	Known interactor	MFSD6	TSPO2	Known interaction
NR3C1	Known interactor	MFSD6	TMEM237	Known interaction
NR3C2	Known interactor	MFSD6	SLC10A6	Known interaction
NR4A1	Known interactor	MFSD6	TMEM258	Known interaction
NR4A2	Known interactor	MFSD6	SHISAL1	Known interaction
NR4A3	Known interactor	MFSD6	SLC39A2	Known interaction
NR5A1	Known interactor	MFSD6	SMIM1	Known interaction
NR5A2	Known interactor	MFSD6	SLC16A2	Known interaction
NR6A1	Known interactor	MFSD6	SELENOK	Known interaction
NRBF2	Known interactor	MFSD6	SLC10A1	Known interaction
NSRP1	Known interactor	MFSD6	PDCD1LG2	Known interaction
NTAQ1	Known interactor	MFSD6	TMEM179B	Known interaction
NUDT14	Known interactor	MFSD6	TMEM242	Known interaction
NUDT21	Known interactor	MFSD6	SYNDIG1	Known interaction
NUP62	Known interactor	MFSD6	SSMEM1	Known interaction
NUP98	Known interactor	MFSD6	SGPL1	Known interaction
NUPR1	Known interactor	MFSD6	STX12	Known interaction
OIP5	Known interactor	MFSD6	NKG7	Known interaction
OLIG2	Known interactor	LRRN2	NEUROD4	Known interaction
ORC2	Known interactor	FER	PPP1R7	Known interaction
ORC5	Known interactor	FER	YWHAB	Known interaction
OTUB1	Known interactor	FER	PIK3R3	Known interaction
OTX2	Known interactor	FER	PIK3R1	Known interaction
OXCT1	Known interactor	FER	KCTD4	Known interaction
PABPC1	Known interactor	FER	JAK1	Known interaction
PAF1	Known interactor	FER	TMF1	Known interaction
PAFAH1B3	Known interactor	FER	STAT3	Known interaction
PAGR1	Known interactor	FER	JUP	Known interaction
PAICS	Known interactor	FKBP7	OXNAD1	Known interaction
PAK2	Known interactor	DMC1	NIF3L1	Known interaction
PAN2	Known interactor	NIF3L1	NME1	Known interaction
PARD3B	Known interactor	NIF3L1	PNMA1	Known interaction
PATL1	Known interactor	NIF3L1	YES1	Known interaction
PATZ1	Known interactor	NIF3L1	SPG21	Known interaction
PAX5	Known interactor	NIF3L1	PRTFDC1	Known interaction
PAX6	Known interactor	NIF3L1	TXN	Known interaction
PAX8	Known interactor	NIF3L1	PCBD1	Known interaction
PAXIP1	Known interactor	NIF3L1	TIFA	Known interaction
PCBD1	Known interactor	NIF3L1	YWHAQ	Known interaction
PCBP1	Known interactor	NIF3L1	SYT17	Known interaction
PCK2	Known interactor	NIF3L1	STAT3	Known interaction
PCNA	Known interactor	NIF3L1	RAD54B	Known interaction
PDCD1LG2	Known interactor	NIF3L1	RABAC1	Known interaction
PDCD4	Known interactor	NIF3L1	NUDT21	Known interaction
PDHB	Known interactor	NIF3L1	PAFAH1B3	Known interaction
PDHX	Known interactor	NIF3L1	THOC7	Known interaction
PDLIM4	Known interactor	NIF3L1	TRIM21	Known interaction
PDPK1	Known interactor	NIF3L1	POLR1C	Known interaction
PDYN	Known interactor	NIF3L1	SEPTIN1	Known interaction
PDZD7	Known interactor	NIF3L1	NUDT14	Known interaction
PDZK1	Known interactor	NIF3L1	SSX2IP	Known interaction
PDZRN3	Known interactor	NIF3L1	SULT2A1	Known interaction
PDZRN4	Known interactor	NIF3L1	TRIM27	Known interaction
PELP1	Known interactor	NIF3L1	SAT1	Known interaction
PFDN1	Known interactor	NIF3L1	SULT1A3	Known interaction
PGR	Known interactor	NIF3L1	S100A1	Known interaction
PHAX	Known interactor	NIF3L1	NME7	Known interaction
PHF1	Known interactor	NIF3L1	STK16	Known interaction
PIAS1	Known interactor	NIF3L1	PTPA	Known interaction
PIAS3	Known interactor	NIF3L1	PPIH	Known interaction
PIK3R1	Known interactor	NIF3L1	TCL1A	Known interaction
PIK3R3	Known interactor	NIF3L1	PAICS	Known interaction
PIN1	Known interactor	NIF3L1	TSC22D4	Known interaction
PITX1	Known interactor	NIF3L1	ORC5	Known interaction
PKP2	Known interactor	NIF3L1	VIM	Known interaction
PKP3	Known interactor	NIF3L1	SULT1A2	Known interaction
PKP4	Known interactor	NIF3L1	NOL3	Known interaction
PLAGL1	Known interactor	CXADR	NCOA1	Known interaction
PLAGL2	Known interactor	NFRKB	TRDMT1	Known interaction
PLAT	Known interactor	NFRKB	UCHL5	Known interaction
PLAU	Known interactor	BLOC1S2	CTNNA3	Known interaction
PLD2	Known interactor	NRDC	PDYN	Known interaction
PLG	Known interactor	FKBP11	RELA	Known interaction
PLK1	Known interactor	A2M	TSC22D1	Known interaction
PLK2	Known interactor	EED	TSC22D1	Known interaction
PLP2	Known interactor	CCR9	SAP130	Known interaction
PLSCR1	Known interactor	CCR9	TMC6	Known interaction
PLSCR2	Known interactor	TMC6	ZBTB2	Known interaction
PML	Known interactor	TMC6	ZDHHC17	Known interaction
PNMA1	Known interactor	ARHGEF12	RPS6KA1	Known interaction
PNMA5	Known interactor	SSX2	TRAPPC2L	Known interaction
POGZ	Known interactor	MEOX1	TRAPPC2L	Known interaction
POLA2	Known interactor	PTOV1	USP16	Known interaction
POLB	Known interactor	DCP1A	DCP2	Known interaction
POLD2	Known interactor	DCP2	POLA2	Known interaction
POLDIP3	Known interactor	DCP2	NAGK	Known interaction
POLI	Known interactor	DCP2	PSMB1	Known interaction
POLR1C	Known interactor	DCP2	MTOR	Known interaction
POLR2G	Known interactor	DCP2	UPF2	Known interaction
POLR3C	Known interactor	DCP2	MIR15B	Known interaction
POLR3D	Known interactor	DCP2	TRIM21	Known interaction
POMC	Known interactor	PDCD4	RPS6KA1	Known interaction
POT1	Known interactor	PDCD4	PSEN1	Known interaction
POU3F2	Known interactor	NOMO1	TRIM63	Known interaction
POU6F2	Known interactor	NOMO1	UBQLN4	Known interaction
PPARA	Known interactor	NOMO1	STAT1	Known interaction
PPARD	Known interactor	NOMO1	UPF2	Known interaction
PPARG	Known interactor	NOMO1	TRIM55	Known interaction
PPARGC1A	Known interactor	KAT8	PLAU	Known interaction
PPIH	Known interactor	KAT8	TP53	Known interaction
PPM1G	Known interactor	KAT8	TP53BP1	Known interaction
PPP1CA	Known interactor	KAT8	PAF1	Known interaction
PPP1CC	Known interactor	KAT8	MSL3	Known interaction
PPP1R18	Known interactor	PLK1	TSC1	Known interaction
PPP1R32	Known interactor	PLK1	USP16	Known interaction
PPP1R3A	Known interactor	DAB1	HNRNPLL	Known interaction
PPP1R7	Known interactor	KRT28	KRT6A	Known interaction
PPP1R8	Known interactor	DUX4	EP300	Known interaction
PPP1R9A	Known interactor	KRT13	KRT6A	Known interaction
PPP2R5C	Known interactor	KDM3B	UBC	Known interaction
PRAM1	Known interactor	KDM3B	RNF41	Known interaction
PRDM4	Known interactor	KDM3B	ZNF512B	Known interaction
PRDX2	Known interactor	KDM3B	SPAG8	Known interaction
PRKAA1	Known interactor	CNOT4	EP300	Known interaction
PRKAA2	Known interactor	H2AC18	USP16	Known interaction
PRKAB2	Known interactor	CCNE1	TSC1	Known interaction
PRKACA	Known interactor	CCDC57	KIAA0408	Known interaction
PRKCA	Known interactor	BRMS1	EP300	Known interaction
PRKCB	Known interactor	METTL2B	PSEN1	Known interaction
PRKCD	Known interactor	BUD31	CTNNBL1	Known interaction
PRKCI	Known interactor	NPTX1	RCN2	Known interaction
PRKCZ	Known interactor	NPTX1	NPTXR	Known interaction
PRKDC	Known interactor	EZH2	KLHDC2	Known interaction
PRMT1	Known interactor	KLHDC2	SELENOK	Known interaction
PRMT2	Known interactor	KLHDC2	SELENOS	Known interaction
PRMT6	Known interactor	KLHDC2	USP1	Known interaction
PRNP	Known interactor	KLHDC2	STRN4	Known interaction
PROX1	Known interactor	APOE	PSEN1	Known interaction
PRPF3	Known interactor	FBXO11	USP16	Known interaction
PRR5	Known interactor	GYPC	TSPAN15	Known interaction
PRR5-ARHGAP8	Known interactor	CYRIB	NIF3L1	Known interaction
PRTFDC1	Known interactor	FOXA2	NCOA1	Known interaction
PSENEN	Known interactor	ARNT	NCOA1	Known interaction
PSMA5	Known interactor	F2RL1	SLC12A5	Known interaction
PSMB1	Known interactor	PRKCI	TSC22D1	Known interaction
PSMB9	Known interactor	CDKN1B	RPS6KA1	Known interaction
PTBP1	Known interactor	CDK1	TSC1	Known interaction
PTBP2	Known interactor	CDK1	EP300	Known interaction
PTEN	Known interactor	BTRC	TSPAN15	Known interaction
PTMA	Known interactor	DMRT3	TSC1	Known interaction
PTN	Known interactor	KRT26	KRT6A	Known interaction
PTOV1	Known interactor	KRTAP11-1	OIT3	Known interaction
PTPA	Known interactor	SETDB1	TSC22D1	Known interaction
PTPN3	Known interactor	MAP3K8	NFKB2	Known interaction
QARS1	Known interactor	MAP3K8	NFKB1	Known interaction
QSOX1	Known interactor	MAP3K8	REL	Known interaction
RAB11A	Known interactor	MAP3K8	RIPK1	Known interaction
RAB3A	Known interactor	MAP3K8	TNIP2	Known interaction
RABAC1	Known interactor	MAP3K8	STIP1	Known interaction
RABEP1	Known interactor	RHEB	TSC1	Known interaction
RAC1	Known interactor	RHEB	RPTOR	Known interaction
RACK1	Known interactor	PPP1R9A	RPS6KA1	Known interaction
RAD23A	Known interactor	PDZRN3	RPS6KA1	Known interaction
RAD50	Known interactor	BDKRB2	NIF3L1	Known interaction
RAD54B	Known interactor	EFHD1	PSEN1	Known interaction
RAN	Known interactor	ELF3	EP300	Known interaction
RAP1B	Known interactor	QARS1	TSC22D1	Known interaction
RARA	Known interactor	DNMT3B	TSC22D1	Known interaction
RARB	Known interactor	DAO	EP300	Known interaction
RARG	Known interactor	MAGI3	RPS6KA1	Known interaction
RASSF1	Known interactor	POGZ	TSC1	Known interaction
RB1	Known interactor	IRS1	RPTOR	Known interaction
RBFOX2	Known interactor	CHD3	TSC22D1	Known interaction
RBM10	Known interactor	CXXC1	EP300	Known interaction
RBM14	Known interactor	ATR	EP300	Known interaction
RBPMS	Known interactor	CD40	MAP3K8	Known interaction
RCN2	Known interactor	E2F1	EP300	Known interaction
RDX	Known interactor	GDI1	PSEN1	Known interaction
RECQL4	Known interactor	COIL	NIF3L1	Known interaction
REL	Known interactor	CFH	EP300	Known interaction
RELA	Known interactor	MED10	NAP1L1	Known interaction
REPS1	Known interactor	GJA8	MFSD6	Known interaction
RGS1	Known interactor	EZR	TSC1	Known interaction
RGS2	Known interactor	GLIS2	TSC1	Known interaction
RHEB	Known interactor	POLDIP3	RPS6KA1	Known interaction
RHOA	Known interactor	ITSN2	PSEN1	Known interaction
RHOXF2	Known interactor	TARS1	TARS3	Known interaction
RIN1	Known interactor	DSC2	PKP3	Known interaction
RIN3	Known interactor	DSC2	PKP2	Known interaction
RIPK1	Known interactor	CITED1	EP300	Known interaction
RIPPLY1	Known interactor	PAN2	PAN3	Known interaction
RMDN3	Known interactor	PAN3	TNRC6B	Known interaction
RNF2	Known interactor	PAN3	SVIL	Known interaction
RNF32	Known interactor	JUP	PSEN1	Known interaction
RNF41	Known interactor	ARPC3	TARS3	Known interaction
ROR2	Known interactor	PRKAA1	RPTOR	Known interaction
RORA	Known interactor	SYNE4	TSPAN15	Known interaction
RORB	Known interactor	DUSP29	NIF3L1	Known interaction
RPIA	Known interactor	AURKA	TSC1	Known interaction
RPL23A	Known interactor	CXCL8	EP300	Known interaction
RPL27	Known interactor	MAPK9	PSEN1	Known interaction
RPL5	Known interactor	ASAH1	TSC22D1	Known interaction
RPS15	Known interactor	EGR1	EP300	Known interaction
RPS6KA5	Known interactor	ESRRG	NCOA1	Known interaction
RPS6KB1	Known interactor	CATIP	CTNNBL1	Known interaction
RPS6KB2	Known interactor	C11orf68	TRAPPC2L	Known interaction
RRAGA	Known interactor	APLP1	TSC22D1	Known interaction
RRAGB	Known interactor	KRT15	NIF3L1	Known interaction
RSPH14	Known interactor	KRT17	KRT6A	Known interaction
RUFY1	Known interactor	EIF4A3	NIF3L1	Known interaction
RUNX1	Known interactor	RBPMS	TSC1	Known interaction
RUNX1T1	Known interactor	DDX24	EP300	Known interaction
RUNX2	Known interactor	ARID5A	TSC1	Known interaction
RUNX3	Known interactor	CTF1	EP300	Known interaction
RUVBL2	Known interactor	DYRK2	DYRK4	Known interaction
RXRA	Known interactor	DYRK4	FBXO25	Known interaction
RXRB	Known interactor	DYRK4	MID1	Known interaction
RYR2	Known interactor	DYRK4	PPP1CC	Known interaction
S100A1	Known interactor	DYRK4	NEDD4	Known interaction
SAMD11	Known interactor	IP6K3	NIF3L1	Known interaction
SAMD7	Known interactor	SH2D2A	TSC1	Known interaction
SAT1	Known interactor	NEK6	NIF3L1	Known interaction
SATB1	Known interactor	SAMD7	TSC1	Known interaction
SAV1	Known interactor	CDCA7L	CTNNBL1	Known interaction
SCAF11	Known interactor	OXCT1	PSEN1	Known interaction
SCN1A	Known interactor	FAM222B	TSC1	Known interaction
SELENOK	Known interactor	CDSN	CTNNA3	Known interaction
SELENOP	Known interactor	CDKN2D	NIF3L1	Known interaction
SELENOS	Known interactor	FAM110A	TSC1	Known interaction
SENP3	Known interactor	CCT4	RPS6KA1	Known interaction
SEPTIN1	Known interactor	CCL26	CCR1	Known interaction
SERTAD1	Known interactor	ETFA	PSEN1	Known interaction
SERTAD2	Known interactor	KDM1A	TSC1	Known interaction
SET	Known interactor	KDM1A	KRT6A	Known interaction
SETD1A	Known interactor	KDM1A	KIAA0408	Known interaction
SETDB1	Known interactor	ATP23	CTNNA3	Known interaction
SFN	Known interactor	MAPK14	TSC1	Known interaction
SGPL1	Known interactor	CCDC120	TSC1	Known interaction
SGTA	Known interactor	FAF1	TSC22D1	Known interaction
SH2D2A	Known interactor	CDK6	TSC1	Known interaction
SHANK3	Known interactor	PITX1	TSC1	Known interaction
SHBG	Known interactor	CEBPD	EP300	Known interaction
SHC3	Known interactor	RDX	TSC1	Known interaction
SHISAL1	Known interactor	CARD9	KIAA0408	Known interaction
SHROOM2	Known interactor	GABRB1	NEUROD4	Known interaction
SIRT1	Known interactor	DCTN1	KIAA0408	Known interaction
SIRT2	Known interactor	COG4	CTNNA3	Known interaction
SKIL	Known interactor	DDX39A	HNRNPLL	Known interaction
SKP2	Known interactor	HSF2BP	KIAA0408	Known interaction
SLC10A1	Known interactor	DLG4	RPS6KA1	Known interaction
SLC10A6	Known interactor	DLST	NAP1L1	Known interaction
SLC16A2	Known interactor	BEX2	KRT6A	Known interaction
SLC18A1	Known interactor	AGO2	DCP2	Known interaction
SLC39A2	Known interactor	CREBBP	RPS6KA1	Known interaction
SLC9A3R2	Known interactor	CREBBP	KDM3B	Known interaction
SMAD1	Known interactor	CREBBP	NAP1L1	Known interaction
SMAD2	Known interactor	COPS2	NIF3L1	Known interaction
SMAD3	Known interactor	COPS2	EP300	Known interaction
SMAD4	Known interactor	ELAVL2	HNRNPAB	Known interaction
SMAD5	Known interactor	FAM9B	HNRNPLL	Known interaction
SMAD7	Known interactor	NGB	NIF3L1	Known interaction
SMARCB1	Known interactor	LMO2	TSC1	Known interaction
SMARCC1	Known interactor	LMO2	NIF3L1	Known interaction
SMARCE1	Known interactor	LAMTOR3	NIF3L1	Known interaction
SMG9	Known interactor	HR	TSC1	Known interaction
SMIM1	Known interactor	KCNQ3	KCNQ5	Known interaction
SMN1	Known interactor	MPP1	RPS6KA1	Known interaction
SNAI1	Known interactor	TFAP2D	TSC1	Known interaction
SNF8	Known interactor	FBN3	TSC22D1	Known interaction
SNIP1	Known interactor	BARD1	HNRNPLL	Known interaction
SNTA1	Known interactor	KRT36	KRT6A	Known interaction
SNTB1	Known interactor	BEND7	NIF3L1	Known interaction
SNTG2	Known interactor	GPS1	SAP130	Known interaction
SNW1	Known interactor	KXD1	NIF3L1	Known interaction
SNX27	Known interactor	ANKRD11	NCOA1	Known interaction
SORBS3	Known interactor	CSNK2B	NAP1L1	Known interaction
SOX4	Known interactor	EIF5A2	NIF3L1	Known interaction
SOX9	Known interactor	CCDC90B	TSC22D1	Known interaction
SP1	Known interactor	ASCC2	CKAP4	Known interaction
SP110	Known interactor	CKAP4	MLH1	Known interaction
SP3	Known interactor	CKAP4	DKK1	Known interaction
SPACA9	Known interactor	CKAP4	WASHC3	Known interaction
SPAG8	Known interactor	CKAP4	NKX3-1	Known interaction
SPATS1	Known interactor	CKAP4	NDUFB7	Known interaction
SPG21	Known interactor	CKAP4	TSNAX	Known interaction
SPHK1	Known interactor	CKAP4	LINC01554	Known interaction
SPIB	Known interactor	CKAP4	MVP	Known interaction
SPINK1	Known interactor	CKAP4	THOC7	Known interaction
SPP1	Known interactor	CKAP4	HAMP	Known interaction
SPRED1	Known interactor	PKP4	PSEN1	Known interaction
SPRY2	Known interactor	ADAMTSL4	HNRNPLL	Known interaction
SRC	Known interactor	DDAH2	RPS6KA1	Known interaction
SREBF1	Known interactor	DDAH2	TSC22D1	Known interaction
SREBF2	Known interactor	SPRED1	TSC22D1	Known interaction
SRF	Known interactor	GPR45	OTX2	Known interaction
SRPK2	Known interactor	ATXN3	RPS6KA1	Known interaction
SRSF11	Known interactor	CTNNB1	PSEN1	Known interaction
SRSF5	Known interactor	CTNNB1	FER	Known interaction
SRY	Known interactor	TGFBR1	TSC22D1	Known interaction
SS18	Known interactor	GBP2	RPS6KA1	Known interaction
SS18L1	Known interactor	MTCH1	PSEN1	Known interaction
SSMEM1	Known interactor	CBY2	KIAA0408	Known interaction
SSX2	Known interactor	KANSL1	KAT8	Known interaction
SSX2B	Known interactor	CDC42	HNRNPAB	Known interaction
SSX2IP	Known interactor	INCA1	STT3B	Known interaction
ST13	Known interactor	BEGAIN	KIAA0408	Known interaction
STAMBP	Known interactor	BAG3	TSC1	Known interaction
STAMBPL1	Known interactor	CCND1	EP300	Known interaction
STAT1	Known interactor	NOTCH2	PSEN1	Known interaction
STAT2	Known interactor	FLNB	PSEN1	Known interaction
STAT3	Known interactor	HNF4G	NCOA1	Known interaction
STAT5A	Known interactor	CCL4	CCR1	Known interaction
STAT5B	Known interactor	ATF5	EP300	Known interaction
STAT6	Known interactor	AP2B1	KIAA0408	Known interaction
STIP1	Known interactor	PPP1R32	TSC1	Known interaction
STK16	Known interactor	MEI4	TRAPPC2L	Known interaction
STMN2	Known interactor	ATM	KAT8	Known interaction
STRIT1	Known interactor	BCAS2	EP300	Known interaction
STRN4	Known interactor	ECSIT	PSEN1	Known interaction
STX12	Known interactor	ECSIT	TARS3	Known interaction
SUB1	Known interactor	CDK4	TSC1	Known interaction
SULT1A2	Known interactor	KCTD17	NIF3L1	Known interaction
SULT1A3	Known interactor	CCDC85B	KIAA0408	Known interaction
SULT2A1	Known interactor	STRIT1	TSPAN15	Known interaction
SUMO1	Known interactor	IRS2	RPTOR	Known interaction
SUMO2	Known interactor	IGFN1	TSC1	Known interaction
SUOX	Known interactor	CUL3	DYRK4	Known interaction
SUV39H1	Known interactor	CALCOCO2	HNRNPLL	Known interaction
SVIL	Known interactor	EPHB3	NFRKB	Known interaction
SYK	Known interactor	KMT2B	TSC22D1	Known interaction
SYNDIG1	Known interactor	CASP7	PSEN1	Known interaction
SYNE4	Known interactor	CASP7	NIF3L1	Known interaction
SYNJ2BP	Known interactor	BSDC1	TRAPPC2L	Known interaction
SYT17	Known interactor	PRMT6	TSC1	Known interaction
TACC2	Known interactor	FRS3	TSC1	Known interaction
TADA2A	Known interactor	FRS3	KIAA0408	Known interaction
TADA3	Known interactor	MAP2K4	MAP3K8	Known interaction
TAF1B	Known interactor	ADRB2	NPTX1	Known interaction
TAF5L	Known interactor	EPB41L3	PSEN1	Known interaction
TAL1	Known interactor	CDKN2B	TSC1	Known interaction
TAMALIN	Known interactor	CDKN2B	NIF3L1	Known interaction
TARS1	Known interactor	FGFR4	TSC1	Known interaction
TARS2	Known interactor	PDZD7	RPS6KA1	Known interaction
TASOR2	Known interactor	ELL	EP300	Known interaction
TBC1D7	Known interactor	CREBZF	CTNNBL1	Known interaction
TBP	Known interactor	UBD	USP16	Known interaction
TBX6	Known interactor	EEF2K	RPS6KA1	Known interaction
TCF12	Known interactor	LCE1C	OIT3	Known interaction
TCF3	Known interactor	CEP72	KIAA0408	Known interaction
TCF4	Known interactor	NATD1	NIF3L1	Known interaction
TCF7L2	Known interactor	KRT34	KRT6A	Known interaction
TCHP	Known interactor	NR4A3	RPS6KA1	Known interaction
TCL1A	Known interactor	DECR2	EP300	Known interaction
TDG	Known interactor	KRT31	KRT6A	Known interaction
TDP2	Known interactor	C1QTNF9	NAP1L1	Known interaction
TEAD1	Known interactor	GOPC	RPS6KA1	Known interaction
TEAD2	Known interactor	GOPC	HNRNPLL	Known interaction
TERF1	Known interactor	NLGN3	NRDC	Known interaction
TERF2	Known interactor	GNB2	TSC22D1	Known interaction
TEX11	Known interactor	DCDC2	NIF3L1	Known interaction
TFAP2A	Known interactor	SHC3	TSC1	Known interaction
TFAP2D	Known interactor	LGALS14	TARS3	Known interaction
TFIP11	Known interactor	KCNIP1	NIF3L1	Known interaction
TGFB1I1	Known interactor	POU6F2	TSC1	Known interaction
TGFBR1	Known interactor	AP3B2	AP3S1	Known interaction
TGS1	Known interactor	AP3B2	CLTC	Known interaction
THAP1	Known interactor	AP3B2	ERBB2	Known interaction
THOC7	Known interactor	AP3B2	RUFY1	Known interaction
THPO	Known interactor	AP3B2	CSNK1A1	Known interaction
THRA	Known interactor	ERBB2	UTP18	Known interaction
THRB	Known interactor	ERBB2	FER	Known interaction
TIFA	Known interactor	CALM2	KCNQ3	Known interaction
TINAGL1	Known interactor	GSK3B	RPS6KA1	Known interaction
TK1	Known interactor	LMNA	LVRN	Known interaction
TLE1	Known interactor	ATF4	CKAP4	Known interaction
TLE5	Known interactor	ATF4	EP300	Known interaction
TLX3	Known interactor	ATF4	TARS3	Known interaction
TMCC2	Known interactor	ARNTL	EP300	Known interaction
TMEFF1	Known interactor	KCTD9	NIF3L1	Known interaction
TMEM179B	Known interactor	FOXO1	NCOA1	Known interaction
TMEM237	Known interactor	MTNR1A	NAP1L1	Known interaction
TMEM242	Known interactor	PPP1R3A	RPS6KA1	Known interaction
TMEM258	Known interactor	FSD1	NAP1L1	Known interaction
TMF1	Known interactor	EFHC2	HNRNPLL	Known interaction
TMX1	Known interactor	ERG28	TSC22D1	Known interaction
TNIP2	Known interactor	HMGXB4	TSC22D1	Known interaction
TNNI1	Known interactor	ABI3	KIAA0408	Known interaction
TNNI2	Known interactor	TLE5	TSC1	Known interaction
TNRC6B	Known interactor	ALKBH4	NIF3L1	Known interaction
TNS2	Known interactor	ALKBH4	EP300	Known interaction
TOB2	Known interactor	ENKD1	TSC1	Known interaction
TOM1L1	Known interactor	HMGB2	NAP1L1	Known interaction
TP53	Known interactor	ERGIC3	MFSD6	Known interaction
TP53BP1	Known interactor	ATF7IP	NOMO1	Known interaction
TP63	Known interactor	CDH16	G6PC1	Known interaction
TP73	Known interactor	CDH16	CTNNB1	Known interaction
TPST1	Known interactor	EEF1A1	EP300	Known interaction
TPST2	Known interactor	SPAG8	TSC1	Known interaction
TPX2	Known interactor	MAST1	RPS6KA1	Known interaction
TRAF2	Known interactor	LIMK2	RPS6KA1	Known interaction
TRAF6	Known interactor	GCDH	PSEN1	Known interaction
TRAPPC3	Known interactor	RGS1	TSC22D1	Known interaction
TRAPPC3L	Known interactor	EBP	MFSD6	Known interaction
TRAPPC4	Known interactor	ARHGAP8	CYGB	Known interaction
TRAPPC6A	Known interactor	ECT2	NOMO1	Known interaction
TRAPPC6B	Known interactor	ACSM5	EP300	Known interaction
TRDMT1	Known interactor	CCR4	SLC12A5	Known interaction
TRERF1	Known interactor	BAG6	NOMO1	Known interaction
TRIM21	Known interactor	CLK1	DSC2	Known interaction
TRIM23	Known interactor	DUSP23	NIF3L1	Known interaction
TRIM27	Known interactor	RIN1	TSC1	Known interaction
TRIM37	Known interactor	CLOCK	EP300	Known interaction
TRIM54	Known interactor	PHAX	RPS6KA1	Known interaction
TRIM55	Known interactor	CEP57L1	TRAPPC2L	Known interaction
TRIM63	Known interactor	CARHSP1	RPS6KA1	Known interaction
TRIP13	Known interactor	CARHSP1	TSC22D1	Known interaction
TRIP4	Known interactor	KIFC3	KRT6A	Known interaction
TRIP6	Known interactor	L1CAM	RPS6KA1	Known interaction
TSC2	Known interactor	CCDC102B	NIF3L1	Known interaction
TSC22D2	Known interactor	NCOA5	TSC22D1	Known interaction
TSC22D4	Known interactor	COPS6	EP300	Known interaction
TSG101	Known interactor	PRKAA2	RPTOR	Known interaction
TSGA10	Known interactor	ARHGEF11	RPS6KA1	Known interaction
TSGA10IP	Known interactor	CILK1	RPTOR	Known interaction
TSHZ3	Known interactor	DBP	EP300	Known interaction
TSNAX	Known interactor	CCL23	CCR1	Known interaction
TSPO2	Known interactor	APIP	NIF3L1	Known interaction
TTK	Known interactor	LINC01554	NAP1L1	Known interaction
TUBA1B	Known interactor	DTX2	NIF3L1	Known interaction
TWIST1	Known interactor	EEF2	EP300	Known interaction
TXLNB	Known interactor	MYLIP	TSC1	Known interaction
TXN	Known interactor	LRIF1	TSC22D1	Known interaction
TXNRD3	Known interactor	FBXO34	OIT3	Known interaction
U2SURP	Known interactor	FSD2	OXNAD1	Known interaction
UBASH3A	Known interactor	CARM1	NCOA1	Known interaction
UBC	Known interactor	CARM1	EP300	Known interaction
UBD	Known interactor	LATS2	TSC1	Known interaction
UBE2D1	Known interactor	H2AZ1	USP16	Known interaction
UBE2I	Known interactor	PRKCZ	PSEN1	Known interaction
UBE2T	Known interactor	CKMT1B	CTNNA3	Known interaction
UBQLN1	Known interactor	TLE1	TSC22D1	Known interaction
UBQLN2	Known interactor	PLD2	RPTOR	Known interaction
UBQLN4	Known interactor	KRT27	KRT6A	Known interaction
UBTF	Known interactor	CRX	CTNNA3	Known interaction
UCHL5	Known interactor	PLK2	TSC1	Known interaction
UMPS	Known interactor	BACE1	PSEN1	Known interaction
UNC119	Known interactor	CSTF2	TSC1	Known interaction
UPF1	Known interactor	ELK1	EP300	Known interaction
UPF2	Known interactor	SP110	TSC22D1	Known interaction
USF2	Known interactor	MAP2K5	TSC1	Known interaction
USHBP1	Known interactor	RAP1B	RPTOR	Known interaction
USP1	Known interactor	C19orf18	MFSD6	Known interaction
USP19	Known interactor	RIN3	TSC1	Known interaction
VAC14	Known interactor	GRID2IP	RPS6KA1	Known interaction
VCP	Known interactor	ATP13A2	CYGB	Known interaction
VDR	Known interactor	ATP13A2	TSPAN14	Known interaction
VENTX	Known interactor	EID1	EP300	Known interaction
VEZF1	Known interactor	GPR42	MFSD6	Known interaction
VGLL3	Known interactor	EGFR	FER	Known interaction
VIM	Known interactor	IKBKB	TSC1	Known interaction
VIP	Known interactor	FXR2	NIF3L1	Known interaction
VPS18	Known interactor	RPL5	TSC22D1	Known interaction
VPS37C	Known interactor	DHPS	NIF3L1	Known interaction
WASHC3	Known interactor	APPL2	TSC1	Known interaction
WBP11	Known interactor	ENOX1	NIF3L1	Known interaction
WDR59	Known interactor	CMC2	CTNNA3	Known interaction
WDR73	Known interactor	EEF1D	RPS6KA1	Known interaction
WDR82	Known interactor	CD79A	MFSD6	Known interaction
WHRN	Known interactor	BOLL	HNRNPLL	Known interaction
WIPI2	Known interactor	MAGI2	RPS6KA1	Known interaction
WIZ	Known interactor	ERBB3	FER	Known interaction
WNK1	Known interactor	CREB1	RPS6KA1	Known interaction
XRCC6	Known interactor	CYP2C18	PSEN1	Known interaction
YBX1	Known interactor	SAMD11	TSC1	Known interaction
YES1	Known interactor	CACNA1A	TSC22D1	Known interaction
YME1L1	Known interactor	ABI1	KIAA0408	Known interaction
YPEL3	Known interactor	DDIT3	EP300	Known interaction
YWHAB	Known interactor	GPR152	MFSD6	Known interaction
YWHAE	Known interactor	AP5B1	NIF3L1	Known interaction
YWHAG	Known interactor	CDH1	PSEN1	Known interaction
YWHAH	Known interactor	CDH1	FER	Known interaction
YWHAQ	Known interactor	FOS	RPS6KA1	Known interaction
YWHAZ	Known interactor	TARS2	TARS3	Known interaction
YY1	Known interactor	CDT1	EP300	Known interaction
ZBED1	Known interactor	APH1A	MFSD6	Known interaction
ZBTB16	Known interactor	CFL1	RPS6KA1	Known interaction
ZBTB17	Known interactor	CFL1	PSEN1	Known interaction
ZBTB2	Known interactor	DCTPP1	NIF3L1	Known interaction
ZBTB42	Known interactor	ENSA	PSEN1	Known interaction
ZBTB48	Known interactor	BAZ2A	KAT8	Known interaction
ZBTB49	Known interactor	KCNQ2	KCNQ3	Known interaction
ZBTB7B	Known interactor	CENPS-CORT	CTNNA3	Known interaction
ZBTB8A	Known interactor	NTAQ1	TSC22D1	Known interaction
ZC3H12A	Known interactor	HOOK2	KIAA0408	Known interaction
ZC3HC1	Known interactor	CCL3L1	CCR1	Known interaction
ZCCHC10	Known interactor	KRT38	KRT6A	Known interaction
ZDHHC17	Known interactor	CCDC33	CTNNA3	Known interaction
ZEB1	Known interactor	GNMT	NIF3L1	Known interaction
ZFPM2	Known interactor	KRT16	KRT6A	Known interaction
ZG16	Known interactor	AKAP9	CTNNA3	Known interaction
ZIC1	Known interactor	GJB2	MFSD6	Known interaction
ZNF148	Known interactor	DUXAP9	RPTOR	Known interaction
ZNF19	Known interactor	EFNB2	PSEN1	Known interaction
ZNF417	Known interactor	CKMT1A	CTNNA3	Known interaction
ZNF426	Known interactor	BCL2L1	PSEN1	Known interaction
ZNF474	Known interactor	ABL1	EP300	Known interaction
ZNF512B	Known interactor	MAPK3	RPTOR	Known interaction
ZNF534	Known interactor	PATZ1	TSC1	Known interaction
ZNF552	Known interactor	CCL28	TSC1	Known interaction
ZNF587	Known interactor	ERBIN	RPS6KA1	Known interaction
ZNF620	Known interactor	MLST8	RPTOR	Known interaction
ZNF662	Known interactor	EIF4EBP1	RPTOR	Known interaction
ZNF76	Known interactor	PIK3R1	PSEN1	Known interaction
ZNF765	Known interactor	PDZRN4	RPS6KA1	Known interaction
ZRANB2	Known interactor	HNF4A	NCOA1	Known interaction
-	Novel interactor	RABEP1	TRAPPC2L	Known interaction
A4GNT	Novel interactor	GAS2L2	NAP1L1	Known interaction
AADAT	Novel interactor	CHD4	EP300	Known interaction
ABHD14A	Novel interactor	HSH2D	TSC1	Known interaction
ABI2	Novel interactor	ADAP1	AP3B2	Known interaction
ACBD5	Novel interactor	BANP	HNRNPLL	Known interaction
ACKR2	Novel interactor	SSX2B	TRAPPC2L	Known interaction
ACP6	Novel interactor	HTRA1	RPS6KA1	Known interaction
ACRV1	Novel interactor	BHLHE40	HNRNPLL	Known interaction
ACSBG2	Novel interactor	CEP192	SHBG	Known interaction
ACVR2B	Novel interactor	CEP192	UBC	Known interaction
ADAM10	Novel interactor	CEP192	LINC00839	Known interaction
ADAMDEC1	Novel interactor	NOS3	PSEN1	Known interaction
ALPI	Novel interactor	KCNIP4	PSEN1	Known interaction
ANAPC16	Novel interactor	GPX8	MFSD6	Known interaction
ANAPC2	Novel interactor	FLAD1	NIF3L1	Known interaction
ANKAR	Novel interactor	REPS1	TRAPPC2L	Known interaction
ANKRD36C	Novel interactor	ALG8	MFSD6	Known interaction
APBB1IP	Novel interactor	FBXW7	PSEN1	Known interaction
ARRDC4	Novel interactor	CYB5R3	MFSD6	Known interaction
ASCC3	Novel interactor	CEBPA	EP300	Known interaction
ASGR1	Novel interactor	CDK2	EP300	Known interaction
ATL1	Novel interactor	CRMP1	TSC22D1	Known interaction
ATP2A3	Novel interactor	MYOZ3	TSC1	Known interaction
BAHCC1	Novel interactor	ERCC6	NAP1L1	Known interaction
BAIAP3	Novel interactor	PRDX2	PSEN1	Known interaction
BIRC2	Novel interactor	GLIPR1L2	PPP1CA	Known interaction
BIRC3	Novel interactor	AQP1	TSC1	Known interaction
BRD3	Novel interactor	DDX17	NCOA1	Known interaction
BTF3	Novel interactor	GFAP	KIAA0408	Known interaction
C2orf88	Novel interactor	ACTB	EP300	Known interaction
CAMLG	Novel interactor	CALM3	KCNQ3	Known interaction
CAPZA2	Novel interactor	KRT19	KRT6A	Known interaction
CASP10	Novel interactor	LCE3A	OIT3	Known interaction
CBX8	Novel interactor	GNB5	TSC22D1	Known interaction
CCDC189	Novel interactor	DEPTOR	RPS6KA1	Known interaction
CCDC40	Novel interactor	LMO3	TRAPPC2L	Known interaction
CCDC88C	Novel interactor	LMO3	NIF3L1	Known interaction
CCL13	Novel interactor	TBC1D7	TSC1	Known interaction
CCT8	Novel interactor	CYP2C8	PSEN1	Known interaction
CD300C	Novel interactor	ASH2L	EP300	Known interaction
CDC25A	Novel interactor	KANK2	PSEN1	Known interaction
CDC6	Novel interactor	KANK2	NCOA1	Known interaction
CDH5	Novel interactor	LENG1	TSC1	Known interaction
CDK3	Novel interactor	C14orf119	NIF3L1	Known interaction
CDKL3	Novel interactor	OTUB1	TSC22D1	Known interaction
CELF4	Novel interactor	CTBP2	EP300	Known interaction
CES2	Novel interactor	FGF13	PSEN1	Known interaction
CFB	Novel interactor	MARK4	RPTOR	Known interaction
CHAT	Novel interactor	CIB1	PSEN1	Known interaction
CHD1	Novel interactor	KCTD7	NIF3L1	Known interaction
CHEK1	Novel interactor	TTK	USP16	Known interaction
CHI3L1	Novel interactor	CUL2	SAP130	Known interaction
CHMP2A	Novel interactor	CRK	FER	Known interaction
CISD1	Novel interactor	ATXN1	TSC1	Known interaction
CKAP2	Novel interactor	ATXN1	HNRNPLL	Known interaction
CKB	Novel interactor	GORASP2	RPS6KA1	Known interaction
CLEC4A	Novel interactor	GORASP2	TSC22D1	Known interaction
CLIC2	Novel interactor	CTNND1	PSEN1	Known interaction
CNTN5	Novel interactor	LY6E	MFSD6	Known interaction
COMMD10	Novel interactor	ARHGDIA	EP300	Known interaction
CORO2A	Novel interactor	AP1M2	PSEN1	Known interaction
CPS1	Novel interactor	MFSD4B	MFSD6	Known interaction
CTAGE1	Novel interactor	KRT40	KRT6A	Known interaction
CUL4B	Novel interactor	GPANK1	TSC1	Known interaction
CXCL12	Novel interactor	GPANK1	TRAPPC2L	Known interaction
CXCR5	Novel interactor	CCND2	TSC1	Known interaction
CYB561	Novel interactor	PDZK1	RPS6KA1	Known interaction
CYP27A1	Novel interactor	AKT1	TSC1	Known interaction
CYP51A1	Novel interactor	AKT1	MAP3K8	Known interaction
DAAM1	Novel interactor	PTPN3	RPS6KA1	Known interaction
DACT1	Novel interactor	CDKN2C	NIF3L1	Known interaction
DAG1	Novel interactor	DOK5	TSC1	Known interaction
DBN1	Novel interactor	CUTC	NIF3L1	Known interaction
DBNDD2	Novel interactor	PABPC1	PAN3	Known interaction
DCT	Novel interactor	DMRTB1	NIF3L1	Known interaction
DCXR	Novel interactor	EPHB6	NIF3L1	Known interaction
DDN	Novel interactor	KRT25	KRT6A	Known interaction
DDR2	Novel interactor	DLC1	RPS6KA1	Known interaction
DDX3Y	Novel interactor	FOXH1	TSC1	Known interaction
DHX57	Novel interactor	PRKACA	PSEN1	Known interaction
DIP2B	Novel interactor	PPM1G	RPS6KA1	Known interaction
DNAJB12	Novel interactor	SPACA9	TSC22D1	Known interaction
DNAJB3	Novel interactor	MXD1	RPS6KA1	Known interaction
DNAJC22	Novel interactor	CITED4	EP300	Known interaction
DNAJC9	Novel interactor	MLXIPL	NIF3L1	Known interaction
DNASE1	Novel interactor	BLZF1	TRAPPC2L	Known interaction
DNM1P46	Novel interactor	BLZF1	CTNNA3	Known interaction
DSC3	Novel interactor	BCL3	EP300	Known interaction
DTWD2	Novel interactor	KRT35	KRT6A	Known interaction
DUSP7	Novel interactor	CCL15	CCR1	Known interaction
DUXAP10	Novel interactor	ARPIN	NIF3L1	Known interaction
EIF4H	Novel interactor	HOXC8	TSC1	Known interaction
EML2	Novel interactor	BEX3	CTNNBL1	Known interaction
ENKUR	Novel interactor	AMT	VAC14	Known interaction
EPB41L4A	Novel interactor	AMT	PDLIM4	Known interaction
ERO1A	Novel interactor	DEDD2	HNRNPAB	Known interaction
ESYT1	Novel interactor	LCN2	TRAPPC2L	Known interaction
EXOC5	Novel interactor	ARID4B	SAP130	Known interaction
F2RL2	Novel interactor	MAGEB4	NEUROD4	Known interaction
FAAP100	Novel interactor	DEK	EP300	Known interaction
FAM13B	Novel interactor	ACTA2	EP300	Known interaction
FAM13C	Novel interactor	FZD1	WNT5A	Known interaction
FAM170A	Novel interactor	BECN1	TSC1	Known interaction
FAM186B	Novel interactor	AGAP1	SMN1	Known interaction
FAM53C	Novel interactor	AGAP1	ZNF534	Known interaction
FBP2	Novel interactor	AGAP1	RHOA	Known interaction
FBXO22	Novel interactor	AGAP1	GUCY1A1	Known interaction
FCN1	Novel interactor	AGAP1	ARF1	Known interaction
FEM1C	Novel interactor	AGAP1	APP	Known interaction
FGF11	Novel interactor	AGAP1	RSPH14	Known interaction
FHOD3	Novel interactor	AGAP1	RAC1	Known interaction
FN1	Novel interactor	AGAP1	ARF6	Known interaction
FOLR2	Novel interactor	AGAP1	GRB7	Known interaction
FRYL	Novel interactor	AGAP1	GUCY1B1	Known interaction
FUS	Novel interactor	AGAP1	SRC	Known interaction
G3BP1	Novel interactor	AGAP1	TK1	Known interaction
GAD2	Novel interactor	AGAP1	CDC42	Known interaction
GADD45G	Novel interactor	APP	TRAPPC2L	Known interaction
GART	Novel interactor	APP	GALE	Known interaction
GAS1	Novel interactor	APP	PLS3	Known interaction
GBP3	Novel interactor	C1orf94	TSC1	Known interaction
GCM1	Novel interactor	DCTD	NIF3L1	Known interaction
GNAI2	Novel interactor	DOCK3	PSEN1	Known interaction
GNL1	Novel interactor	CDC5L	CTNNBL1	Known interaction
GNL3	Novel interactor	ACTN1	PSEN1	Known interaction
GOLGA5	Novel interactor	NRBF2	RPTOR	Known interaction
GPR15	Novel interactor	ARAF	TSC1	Known interaction
GPR27	Novel interactor	ASCL1	EP300	Known interaction
GSTZ1	Novel interactor	PPP1R18	TSC1	Known interaction
GSX1	Novel interactor	GAPDH	PSEN1	Known interaction
GTF2A1	Novel interactor	IFT20	OXNAD1	Known interaction
GTF2F2	Novel interactor	PARD3B	RPS6KA1	Known interaction
GTF2IRD1	Novel interactor	CDKN2A	TSC1	Known interaction
HADHA	Novel interactor	FAM20C	TSC22D1	Known interaction
HAS3	Novel interactor	CEBPB	RPS6KA1	Known interaction
HCFC2	Novel interactor	TBX6	TSC1	Known interaction
HDAC5	Novel interactor	HMGA1	HNRNPAB	Known interaction
HIBCH	Novel interactor	GEM	KRT6A	Known interaction
HRH4	Novel interactor	CCL3	CCR1	Known interaction
HSD17B4	Novel interactor	PDHB	TSC22D1	Known interaction
HUNK	Novel interactor	LHX2	TRAPPC2L	Known interaction
ICOS	Novel interactor	DCP1B	DCP2	Known interaction
IGFBP2	Novel interactor	NOTCH3	PSEN1	Known interaction
IL23A	Novel interactor	NF2	TSC1	Known interaction
IMPDH2	Novel interactor	AUTS2	EP300	Known interaction
IMPG1	Novel interactor	CALM1	USP16	Known interaction
ITM2C	Novel interactor	CALM1	KCNQ3	Known interaction
ITSN1	Novel interactor	CALM1	FER	Known interaction
IWS1	Novel interactor	CHCHD2	TSC1	Known interaction
JCAD	Novel interactor	DYNLT3	NIF3L1	Known interaction
JPH2	Novel interactor	CSNK2A1	UTP18	Known interaction
KCNA1	Novel interactor	CSNK2A1	NAP1L1	Known interaction
KCNJ2	Novel interactor	CALCOCO1	CTNNBL1	Known interaction
KCNMB3	Novel interactor	SMG9	TSC1	Known interaction
KCNN2	Novel interactor	APOL3	MFSD6	Known interaction
KIF20A	Novel interactor	SUOX	TSC1	Known interaction
KLRC2	Novel interactor	GORASP1	RPS6KA1	Known interaction
KLRC3	Novel interactor	HGS	KRT6A	Known interaction
KRT1	Novel interactor	KMT2C	TSC22D1	Known interaction
KRT3	Novel interactor	LNX1	RPS6KA1	Known interaction
KRT4	Novel interactor	TNS2	TSC1	Known interaction
KRT5	Novel interactor	RASSF1	TSC1	Known interaction
KRT6B	Novel interactor	ARID1A	NCOA1	Known interaction
KRT7	Novel interactor	ANKRD23	NAP1L1	Known interaction
L3MBTL1	Novel interactor	PATL1	TSC1	Known interaction
LBP	Novel interactor	IFIT3	LVRN	Known interaction
LHFPL6	Novel interactor	ACY3	MAP3K8	Known interaction
LILRB2	Novel interactor	HBA1	NAP1L1	Known interaction
LIMS1	Novel interactor	CRCT1	OIT3	Known interaction
LIN7B	Novel interactor	LCE1F	OIT3	Known interaction
LNX2	Novel interactor	AQP7	MFSD6	Known interaction
LPAR6	Novel interactor	APBA1	PSEN1	Known interaction
LRCH2	Novel interactor	ADIPOQ	MFSD6	Known interaction
LRRC28	Novel interactor	RPTOR	WDR45B	Novel interaction
LRRC74A	Novel interactor	RPTOR	TNRC6C	Novel interaction
LRRC8D	Novel interactor	RPTOR	USP36	Novel interaction
LTN1	Novel interactor	KCNJ2	UTP18	Novel interaction
LYG2	Novel interactor	A4GNT	CCR1	Novel interaction
LYZL2	Novel interactor	CCR1	DDX3Y	Novel interaction
M6PR	Novel interactor	CCR1	CTNNB1	Novel interaction
MAP4K3	Novel interactor	CCR1	PRSS50	Novel interaction
MARCO	Novel interactor	CCR1	KRT6A	Novel interaction
MASTL	Novel interactor	CCR1	PXMP2	Novel interaction
MBTD1	Novel interactor	CCR1	DNAJB12	Novel interaction
MCHR1	Novel interactor	CCR1	HAS3	Novel interaction
MECOM	Novel interactor	CCR1	DUSP7	Novel interaction
MELTF	Novel interactor	CCR1	DAG1	Novel interaction
MIS12	Novel interactor	CCR1	CDC25A	Novel interaction
MKX	Novel interactor	CCR1	GNAI2	Novel interaction
MPV17L	Novel interactor	CCR1	NPM1	Novel interaction
MRPL52	Novel interactor	DNASE1	TSC22D1	Novel interaction
MSTN	Novel interactor	TRAPPC2L	TUBB3	Novel interaction
MTIF2	Novel interactor	CTNNA3	PPP2R5E	Novel interaction
MTIF3	Novel interactor	CTNNA3	DNAJC9	Novel interaction
MTMR14	Novel interactor	CTNNA3	PCF11	Novel interaction
MTPAP	Novel interactor	NAP1L1	UBQLN2	Novel interaction
MUC1	Novel interactor	NAP1L1	ZDHHC17	Novel interaction
MX1	Novel interactor	FDX1	PBRM1	Novel interaction
MXRA7	Novel interactor	FDX1	LILRB2	Novel interaction
MYL9	Novel interactor	FDX1	RDH5	Novel interaction
MYO9A	Novel interactor	ESYT1	OIT3	Novel interaction
NDE1	Novel interactor	ESYT1	NEUROD4	Novel interaction
NDUFA9	Novel interactor	OIT3	UNC5B	Novel interaction
NDUFS8	Novel interactor	OIT3	TBATA	Novel interaction
NFATC2IP	Novel interactor	OIT3	PLA2G12B	Novel interaction
NIFK	Novel interactor	OIT3	TYSND1	Novel interaction
NPTX2	Novel interactor	NEUROD4	RNF41	Novel interaction
NQO1	Novel interactor	NEUROD4	PYM1	Novel interaction
NRG2	Novel interactor	NEUROD4	SARNP	Novel interaction
NRSN1	Novel interactor	PSEN1	SNUPN	Novel interaction
NTAN1	Novel interactor	PSEN1	RBSN	Novel interaction
NUCB2	Novel interactor	EP300	SDC4	Novel interaction
OGDH	Novel interactor	EP300	PRG4	Novel interaction
OPCML	Novel interactor	EP300	MCHR1	Novel interaction
OR11H12	Novel interactor	EP300	RBX1	Novel interaction
OR8G1	Novel interactor	EP300	MELTF	Novel interaction
ORAI3	Novel interactor	EP300	SNRPA	Novel interaction
OSGEPL1	Novel interactor	CD300C	CYGB	Novel interaction
OTOF	Novel interactor	CYGB	PRRG4	Novel interaction
OXSR1	Novel interactor	CYGB	WBP11	Novel interaction
P2RX4	Novel interactor	CYGB	FAAP100	Novel interaction
PAEP	Novel interactor	CYGB	TBC1D16	Novel interaction
PARD3	Novel interactor	GTF2A1	HNRNPLL	Novel interaction
PBRM1	Novel interactor	HNRNPLL	TMEM178A	Novel interaction
PCDH12	Novel interactor	HNRNPLL	MAP4K3	Novel interaction
PCDHGB7	Novel interactor	HNRNPLL	NRG2	Novel interaction
PCDHGC4	Novel interactor	HNRNPLL	TRIM29	Novel interaction
PCDHGC5	Novel interactor	HNRNPLL	ZNF311	Novel interaction
PCF11	Novel interactor	HNRNPLL	OTOF	Novel interaction
PCSK1	Novel interactor	HNRNPLL	SRSF7	Novel interaction
PDGFB	Novel interactor	HNRNPLL	PRSS8	Novel interaction
PDK2	Novel interactor	RPL19	TMPRSS15	Novel interaction
PDZD3	Novel interactor	TRAF2	TSC1	Novel interaction
PHLPP1	Novel interactor	NCOA1	PPP1CB	Novel interaction
PIGN	Novel interactor	NCOA1	SLC28A2	Novel interaction
PIGO	Novel interactor	NCOA1	PPM1B	Novel interaction
PLA2G12B	Novel interactor	NCOA1	SRD5A2	Novel interaction
PLA2G5	Novel interactor	NCOA1	ZNF512	Novel interaction
PLEKHB2	Novel interactor	GABPA	TMPRSS15	Novel interaction
PLXNC1	Novel interactor	SATB1	STT3B	Novel interaction
POC1A	Novel interactor	KIAA0408	MAP3K5	Novel interaction
POLR3B	Novel interactor	TSC1	ZNF79	Novel interaction
POTEG	Novel interactor	TSC1	TUBB4B	Novel interaction
PPIE	Novel interactor	HNRNPAB	PROP1	Novel interaction
PPM1B	Novel interactor	HNRNPAB	SYNCRIP	Novel interaction
PPP1CB	Novel interactor	CTNNBL1	LBP	Novel interaction
PPP2R5E	Novel interactor	CRACDL	RNF149	Novel interaction
PRDM1	Novel interactor	CRACDL	LYG2	Novel interaction
PRG4	Novel interactor	SMARCC1	STT3B	Novel interaction
PROP1	Novel interactor	STT3B	XYLB	Novel interaction
PRPH	Novel interactor	OXNAD1	SLC6A1	Novel interaction
PRR16	Novel interactor	OXNAD1	SLC6A6	Novel interaction
PRRG4	Novel interactor	OXNAD1	SEC13	Novel interaction
PRRT2	Novel interactor	KRT6A	RND1	Novel interaction
PRSS50	Novel interactor	KRT6A	KRT6B	Novel interaction
PRSS8	Novel interactor	KRT6A	TARBP2	Novel interaction
PTPN5	Novel interactor	KRT6A	PRPH	Novel interaction
PTPRG	Novel interactor	KRT6A	KRT7	Novel interaction
PWP1	Novel interactor	KRT6A	TMBIM6	Novel interaction
PXMP2	Novel interactor	EXOC5	KIAA0586	Novel interaction
PYM1	Novel interactor	KIAA0586	RTN1	Novel interaction
RABEP2	Novel interactor	MFSD6	MSTN	Novel interaction
RABGGTB	Novel interactor	MFSD6	WDR75	Novel interaction
RANGAP1	Novel interactor	MFSD6	STAT1	Novel interaction
RAPH1	Novel interactor	MFSD6	OSGEPL1	Novel interaction
RASA4	Novel interactor	CHD1	FER	Novel interaction
RBM15B	Novel interactor	FER	PCSK1	Novel interaction
RBSN	Novel interactor	FER	GPR15	Novel interaction
RBX1	Novel interactor	FER	HSD17B4	Novel interaction
RDH5	Novel interactor	NIF3L1	TRAK2	Novel interaction
RECK	Novel interactor	NIF3L1	RGMB	Novel interaction
REEP2	Novel interactor	NIF3L1	RAPH1	Novel interaction
RELCH	Novel interactor	FBP2	NFRKB	Novel interaction
REV1	Novel interactor	NFRKB	ST14	Novel interaction
RFXAP	Novel interactor	NFRKB	NUCB2	Novel interaction
RGMB	Novel interactor	NFRKB	OPCML	Novel interaction
RHEBL1	Novel interactor	NFRKB	THYN1	Novel interaction
RIC8B	Novel interactor	FGF11	NRDC	Novel interaction
RNASE12	Novel interactor	NRDC	RPS26P15	Novel interaction
RND1	Novel interactor	NRDC	TTC39A	Novel interaction
RNF149	Novel interactor	NRDC	ZFYVE9	Novel interaction
RNF152	Novel interactor	ASCC3	RPS6KA1	Novel interaction
RNF213	Novel interactor	BAHCC1	RPTOR	Novel interaction
RO60	Novel interactor	DNAJC22	FKBP11	Novel interaction
RPL19	Novel interactor	ACSBG2	RPS6KA1	Novel interaction
RPP30	Novel interactor	KRT1	KRT6A	Novel interaction
RPS24	Novel interactor	SAP130	SFT2D3	Novel interaction
RPS26P15	Novel interactor	SAP130	SGK2	Novel interaction
RPS4Y1	Novel interactor	OGDH	SERPINB7	Novel interaction
RSAD1	Novel interactor	SERPINB7	ZCCHC2	Novel interaction
RTN1	Novel interactor	SERPINB7	SLC5A2	Novel interaction
RUFY2	Novel interactor	SERPINB7	TAX1BP1	Novel interaction
SARNP	Novel interactor	DCP2	KCNN2	Novel interaction
SDC4	Novel interactor	DCP2	MAPK3	Novel interaction
SEC13	Novel interactor	DCP2	EPB41L4A	Novel interaction
SELENBP1	Novel interactor	DCP2	TMED7	Novel interaction
SEMA6A	Novel interactor	DCP2	MX1	Novel interaction
SEPSECS	Novel interactor	DCP2	FEM1C	Novel interaction
SERBP1	Novel interactor	ADAMDEC1	TSPAN15	Novel interaction
SFT2D3	Novel interactor	TSPAN15	TSPO	Novel interaction
SGIP1	Novel interactor	KCNA1	NOMO1	Novel interaction
SGK2	Novel interactor	NOMO1	PPIE	Novel interaction
SH3BP4	Novel interactor	NOMO1	ZNF75A	Novel interaction
SLC16A6	Novel interactor	NOMO1	NTAN1	Novel interaction
SLC19A3	Novel interactor	NOMO1	PDZD3	Novel interaction
SLC25A16	Novel interactor	NOMO1	VWF	Novel interaction
SLC28A2	Novel interactor	FBXO22	SERPINB7	Novel interaction
SLC34A3	Novel interactor	KAT8	LIMS1	Novel interaction
SLC35C2	Novel interactor	KAT8	ORAI3	Novel interaction
SLC3A1	Novel interactor	KAT8	PRRT2	Novel interaction
SLC41A2	Novel interactor	KAT8	NFATC2IP	Novel interaction
SLC5A2	Novel interactor	KAT8	RABEP2	Novel interaction
SLC6A1	Novel interactor	KAT8	ZNF764	Novel interaction
SLC6A6	Novel interactor	KAT8	SLC7A5P1	Novel interaction
SLC7A5P1	Novel interactor	KAT8	SRY	Novel interaction
SLMAP	Novel interactor	KAT8	SSTR5	Novel interaction
SNRPA	Novel interactor	DBNDD2	SLC12A5	Novel interaction
SNUPN	Novel interactor	SLC12A5	TTPAL	Novel interaction
SPIRE1	Novel interactor	SLC12A5	SLC35C2	Novel interaction
SRD5A2	Novel interactor	CES2	NAP1L1	Novel interaction
SRFBP1	Novel interactor	CDKL3	KDM3B	Novel interaction
SRSF7	Novel interactor	KDM3B	PCDHGC4	Novel interaction
SSTR5	Novel interactor	KDM3B	PCDHGC5	Novel interaction
ST14	Novel interactor	KDM3B	REEP2	Novel interaction
STX1B	Novel interactor	KDM3B	PCDH12	Novel interaction
SULT1C4	Novel interactor	KDM3B	PCDHGB7	Novel interaction
SYNCRIP	Novel interactor	CAPZA2	TSC1	Novel interaction
TARBP2	Novel interactor	HRH4	SERPINB7	Novel interaction
TAX1BP1	Novel interactor	CASP10	NPTX1	Novel interaction
TBATA	Novel interactor	NPTX1	SLC3A1	Novel interaction
TBC1D16	Novel interactor	NPTX1	STX1B	Novel interaction
TFPI2	Novel interactor	NPTX1	ZNF92	Novel interaction
TGIF2	Novel interactor	NPTX1	NPTX2	Novel interaction
THBS1	Novel interactor	CORO2A	FDX1	Novel interaction
THYN1	Novel interactor	COL15A1	PDGFB	Novel interaction
TICAM2	Novel interactor	COL15A1	MYO9A	Novel interaction
TLR8	Novel interactor	COL15A1	GTF2IRD1	Novel interaction
TM2D3	Novel interactor	COL15A1	PIGO	Novel interaction
TMBIM6	Novel interactor	COL15A1	GAS1	Novel interaction
TMED7	Novel interactor	COL15A1	GOLGA5	Novel interaction
TMEM178A	Novel interactor	KLHDC2	MIS12	Novel interaction
TNFAIP8	Novel interactor	HDAC5	UTP18	Novel interaction
TNFRSF10B	Novel interactor	RFXAP	TSC22D1	Novel interaction
TNRC6C	Novel interactor	SLC25A16	TSPAN15	Novel interaction
TRAK2	Novel interactor	ACBD5	GPR158	Novel interaction
TRIM29	Novel interactor	GPR158	MASTL	Novel interaction
TRPC5	Novel interactor	GPR158	PRTFDC1	Novel interaction
TSPAN32	Novel interactor	GPR158	MKX	Novel interaction
TSPO	Novel interactor	CHEK1	NFRKB	Novel interaction
TTC39A	Novel interactor	SETDB1	TSPAN15	Novel interaction
TTPAL	Novel interactor	CKB	PSEN1	Novel interaction
TUBB	Novel interactor	MAP3K8	PARD3	Novel interaction
TUBB3	Novel interactor	MAP3K8	RANGAP1	Novel interaction
TUBB4B	Novel interactor	MAP3K8	MTPAP	Novel interaction
TXK	Novel interactor	MAP3K8	PDK2	Novel interaction
TYSND1	Novel interactor	FCN1	TSC1	Novel interaction
UGT1A1	Novel interactor	ANKAR	MFSD6	Novel interaction
UGT1A3	Novel interactor	FUS	PCDHA9	Novel interaction
UNC5B	Novel interactor	PCDHA9	RPS24	Novel interaction
USP36	Novel interactor	MTMR14	OXNAD1	Novel interaction
VWF	Novel interactor	CCT8	USP16	Novel interaction
WDR45B	Novel interactor	POTEG	RNASE13	Novel interaction
WDR75	Novel interactor	IRS1	NRDC	Novel interaction
WFDC2	Novel interactor	BTF3	USP16	Novel interaction
WSCD2	Novel interactor	ABI2	NIF3L1	Novel interaction
XYLB	Novel interactor	KRT3	KRT6A	Novel interaction
ZBTB33	Novel interactor	SGIP1	USP16	Novel interaction
ZCCHC2	Novel interactor	TARS3	TM2D3	Novel interaction
ZFYVE9	Novel interactor	CDC6	DSC2	Novel interaction
ZNF195	Novel interactor	DSC2	RO60	Novel interaction
ZNF311	Novel interactor	DSC2	ITSN1	Novel interaction
ZNF512	Novel interactor	DSC2	FHOD3	Novel interaction
ZNF75A	Novel interactor	DSC2	DSC3	Novel interaction
ZNF764	Novel interactor	CHI3L1	TSPAN15	Novel interaction
ZNF79	Novel interactor	MPV17L	NOMO1	Novel interaction
ZNF92	Novel interactor	FRYL	PLS3	Novel interaction
		PLS3	ZNF195	Novel interaction
		PLS3	TSPAN32	Novel interaction
		PLS3	WFDC2	Novel interaction
		PLS3	TRPC5	Novel interaction
		PLS3	TGIF2	Novel interaction
		PLS3	ZBTB33	Novel interaction
		PLS3	PTPN5	Novel interaction
		PAEP	TSC1	Novel interaction
		DNAH1	SEPSECS	Novel interaction
		DNAH1	LIN7B	Novel interaction
		DNAH1	POC1A	Novel interaction
		DNAH1	RPP30	Novel interaction
		DNAH1	GNL3	Novel interaction
		DNAH1	G3BP1	Novel interaction
		FN1	NPTX1	Novel interaction
		KLRC2	NIF3L1	Novel interaction
		RASA4	ZAN	Novel interaction
		GTF2F2	TSC22D1	Novel interaction
		CUL4B	PLS3	Novel interaction
		SLC34A3	USP16	Novel interaction
		IL23A	NEUROD4	Novel interaction
		JPH2	SLC12A5	Novel interaction
		TLR8	UTP18	Novel interaction
		DCT	PSEN1	Novel interaction
		CYB561	NCOA1	Novel interaction
		CHAT	KCNQ3	Novel interaction
		KCNQ3	TNFRSF10B	Novel interaction
		KCNQ3	THBS1	Novel interaction
		ENKUR	GPR158	Novel interaction
		CKAP4	HCFC2	Novel interaction
		CKAP4	PWP1	Novel interaction
		CKAP4	RIC8B	Novel interaction
		CKAP4	SLC41A2	Novel interaction
		CKAP4	POLR3B	Novel interaction
		CKAP4	WSCD2	Novel interaction
		CKAP4	PLXNC1	Novel interaction
		LHFPL6	WNT5A	Novel interaction
		GPR45	PLEKHB2	Novel interaction
		GPR45	REV1	Novel interaction
		GPR45	SULT1C4	Novel interaction
		ADAM10	MAP3K8	Novel interaction
		CAMLG	STT3B	Novel interaction
		RSAD1	UTP18	Novel interaction
		GBP2	LRRC8B	Novel interaction
		LRRC8B	LRRC8D	Novel interaction
		FAM53C	KDM3B	Novel interaction
		GAD2	MAP3K8	Novel interaction
		IGFBP2	RPS6KA1	Novel interaction
		MTIF3	PAN3	Novel interaction
		LTN1	USP16	Novel interaction
		OR11H12	RNASE13	Novel interaction
		FAM186B	FKBP11	Novel interaction
		CBX8	RPTOR	Novel interaction
		BAIAP3	NOMO1	Novel interaction
		RABGGTB	RPS6KA1	Novel interaction
		CNTN5	FDX1	Novel interaction
		KCNMB3	NAP1L1	Novel interaction
		FOLR2	TSC1	Novel interaction
		SELENOS	TARS3	Novel interaction
		CCDC40	RPTOR	Novel interaction
		GNL1	KRT6A	Novel interaction
		GART	TMPRSS15	Novel interaction
		JCAD	MAP3K8	Novel interaction
		NRSN1	PLS3	Novel interaction
		ACKR2	DCP2	Novel interaction
		PTPA	TSC1	Novel interaction
		RPS4Y1	TMPRSS15	Novel interaction
		BIRC2	FDX1	Novel interaction
		DTWD2	LVRN	Novel interaction
		LVRN	PRR16	Novel interaction
		LVRN	TICAM2	Novel interaction
		LVRN	SRFBP1	Novel interaction
		LVRN	TNFAIP8	Novel interaction
		LVRN	SEMA6A	Novel interaction
		ARRDC4	TARS3	Novel interaction
		HUNK	TMPRSS15	Novel interaction
		TCHP	TSPAN15	Novel interaction
		AADAT	STT3B	Novel interaction
		M6PR	TMPRSS15	Novel interaction
		ASGR1	PLS3	Novel interaction
		DUXAP10	RNASE13	Novel interaction
		ATP2A3	CDH16	Novel interaction
		CDH16	TUBB	Novel interaction
		CDH16	GCM1	Novel interaction
		CDH16	NQO1	Novel interaction
		CDH16	MRPL52	Novel interaction
		CDH16	NDUFS8	Novel interaction
		CDH16	CDH5	Novel interaction
		PRDM1	UTP18	Novel interaction
		PHLPP1	SERPINB7	Novel interaction
		RNF213	RPTOR	Novel interaction
		ATL1	KLHDC2	Novel interaction
		CXCR5	PLS3	Novel interaction
		NDE1	NOMO1	Novel interaction
		EML2	KLHDC2	Novel interaction
		OR8G1	USP16	Novel interaction
		ACRV1	PLS3	Novel interaction
		GADD45G	HNRNPAB	Novel interaction
		NIFK	SAP130	Novel interaction
		DNM1P46	TARS3	Novel interaction
		CHMP2A	NCOA1	Novel interaction
		TXK	UTP18	Novel interaction
		ANAPC2	USP16	Novel interaction
		GPR27	WNT5A	Novel interaction
		SLC16A6	TSC1	Novel interaction
		HIBCH	MFSD6	Novel interaction
		KRT4	KRT6A	Novel interaction
		DIP2B	FKBP11	Novel interaction
		LRCH2	PLS3	Novel interaction
		ANKRD36C	CRACDL	Novel interaction
		RELCH	SERPINB7	Novel interaction
		GSX1	PAN3	Novel interaction
		DHX57	HNRNPLL	Novel interaction
		MXRA7	NPTX1	Novel interaction
		CCDC65	FAM186B	Novel interaction
		CCDC65	DNAJC22	Novel interaction
		CCDC65	RHEBL1	Novel interaction
		CYP27A1	DCP2	Novel interaction
		RNF152	SERPINB7	Novel interaction
		CKAP2	TSC22D1	Novel interaction
		GNMT	STT3B	Novel interaction
		CXCL12	RPS6KA1	Novel interaction
		CXCL12	NIF3L1	Novel interaction
		DDN	FKBP11	Novel interaction
		ANAPC16	OIT3	Novel interaction
		COMMD10	LVRN	Novel interaction
		ERO1A	KLHDC2	Novel interaction
		KLRC3	TSPAN15	Novel interaction
		RECK	RPS6KA1	Novel interaction
		PTPRG	WNT5A	Novel interaction
		PIGN	SERPINB7	Novel interaction
		MBTD1	UTP18	Novel interaction
		BICC1	CISD1	Novel interaction
		BICC1	FAM13C	Novel interaction
		DBN1	HNRNPAB	Novel interaction
		BHLHE40	OXNAD1	Novel interaction
		CEP192	SPIRE1	Novel interaction
		CEP192	CTAGE1	Novel interaction
		CYP51A1	STT3B	Novel interaction
		LNX2	PAN3	Novel interaction
		MECOM	SAP130	Novel interaction
		IMPG1	WNT5A	Novel interaction
		ACVR2B	WNT5A	Novel interaction
		CCDC88C	TSC22D1	Novel interaction
		GBP3	LRRC8B	Novel interaction
		=-	RPS6KA1	Novel interaction
		LPAR6	TSC22D1	Novel interaction
		GALE	MUC1	Novel interaction
		GALE	PLA2G5	Novel interaction
		MYL9	SLC12A5	Novel interaction
		DCXR	RPTOR	Novel interaction
		OXSR1	STT3B	Novel interaction
		GSTZ1	PSEN1	Novel interaction
		CPS1	NCOA1	Novel interaction
		P2RX4	USP16	Novel interaction
		FAM170A	LVRN	Novel interaction
		CFB	NOMO1	Novel interaction
		LRRC74A	PSEN1	Novel interaction
		EIF4H	STT3B	Novel interaction
		ACP6	MAP3K8	Novel interaction
		NDUFA9	TSC1	Novel interaction
		HADHA	NCOA1	Novel interaction
		KIF20A	PCDHA9	Novel interaction
		CLEC4A	KAT8	Novel interaction
		ICOS	NIF3L1	Novel interaction
		KRT5	KRT6A	Novel interaction
		MARCO	SAP130	Novel interaction
		LRRC28	TARS3	Novel interaction
		AMT	RBM15B	Novel interaction
		AMT	IMPDH2	Novel interaction
		AMT	RHOA	Novel interaction
		AMT	SLMAP	Novel interaction
		AMT	SH3BP4	Novel interaction
		AMT	F2RL2	Novel interaction
		DDR2	STT3B	Novel interaction
		MTIF2	NAP1L1	Novel interaction
		LYZL2	MAP3K8	Novel interaction
		AGAP1	ITM2C	Novel interaction
		AGAP1	DNAJB3	Novel interaction
		AGAP1	UGT1A3	Novel interaction
		AGAP1	UGT1A1	Novel interaction
		AGAP1	ALPI	Novel interaction
		AGAP1	SP110	Novel interaction
		AGAP1	SLC19A3	Novel interaction
		RNASE12	RNASE13	Novel interaction
		ABHD14A	DNAH1	Novel interaction
		CLIC2	EP300	Novel interaction
		C2orf88	MFSD6	Novel interaction
		CASP4	NOMO1	Novel interaction
		BRD3	TSC1	Novel interaction
		SERBP1	TSPAN15	Novel interaction
		TFPI2	ZAN	Novel interaction
		APBB1IP	GPR158	Novel interaction
		FAM13B	KDM3B	Novel interaction
		IWS1	SAP130	Novel interaction
		CELF4	DSC2	Novel interaction
		DAAM1	KIAA0586	Novel interaction
		SELENBP1	WNT5A	Novel interaction
		RUFY2	TSPAN15	Novel interaction
		CDK3	NAP1L1	Novel interaction
		CCDC189	KAT8	Novel interaction
		DACT1	KIAA0586	Novel interaction
		L3MBTL1	SLC12A5	Novel interaction
		BIRC3	FDX1	Novel interaction
		CCL13	CCR1	Novel interaction

## Sheet: Data File S2
Data File S2. List of modules detected in the HLHS interactome
Number of genes in the module	Genes	Enriched GO biological process
2	CTNNA3, ORC2	Nil
2	NRDC, H3C14	Nil
2	SATB1, STT3B	Nil
2	TMPRSS15, GABPA	Nil
2	MTOR, DCP2	Nil
2	GBP2, LRRC8B	Nil
3	TMC6, CCR9, SAP130	Nil
3	HNRNPAB, H3C1, TP63	Nil
4	FKBP11, DNAJC22, CCDC65, FAM186B	Nil
4	MAP3K8, TNIP2, REL, TRAPPC2L	Nil
4	H2AC4, USP16, H2BC3, H4-16	Nil
4	CYGB, ATP13A2, WBP11, TSPAN14	Nil
5	NOMO1, CEP192, SHBG, EXOSC10, CASP4	Nil
6	MFSD6, ATF4, TARS3, SELENOS, KLHDC2, SELENOK	Response to endoplasmic reticulum stress (p-value = 2.00E-03, odds ratio = 55.26)
6	MCM3AP, CARHSP1, TSC22D1, SP110, DDAH2, AGAP1	Nil
7	KDM3B, AMT, VAC14, OIT3, NEUROD4, RNF41, ESYT1	Nil
20	KIAA0408, KRT15, NIF3L1, THOC7, KRT6A, NDUFB7, CCDC85B, TSPAN15, TCHP, CXCL12, ALKBH4, HNRNPLL, CKAP4, TSC22D4, GNMT, GPR158, PRTFDC1, WASHC3, PNMA1, PTPA	Nil
25	ETV1, JUP, TCF7L2, CTNNB1, TSC2, RPS6KB1, DSC2, FER, CTNND1, PSEN1, CFL1, IRS1, RPS6KA1, ECSIT, PDCD4, RPTOR, RHEB, TTK, MITF, TSC1, APH1A, MAPT, YWHAB, FAM110A, CDH16	TOR signaling (p-value = 6.97E-04, odds ratio = 27.79)
40	STAT1, TRAF2, NCOA1, NR4A1, RPS6KA5, COPS2, TP53, CTNNBL1, CALCOCO1, EP300, CREBBP, NR1I2, NFKB1, STAT3, STAT6, SMARCC1, HMGB1, CCR1, MAPK1, PPARD, HNF1A, NR1H4, CEBPB, NAP1L1, AHR, BCL3, NFRKB, KAT8, TP53BP1, DDX5, TRIP4, FOXP3, NR2F6, CARM1, PPARA, SRY, H4C1, RORA, HOXD4, H1-1	Intracellular receptor signaling pathway (p-value = 9.44E-14, odds ratio = 20.58)

## Sheet: Data File S3
Data File S3. List of all the pathways associated with at least one of the HLHS interactome genes, along with their statistical significance of association (with Bonferroni correction)
Pathway	P-value	Enrichment ratio	Number of genes in the HLHS interactome	Genes in the HLHS interactome
Molecular Mechanisms of Cancer	7.94328e-36	0.272	121	ABL1, AKT1, APH1A, APH1B, ARHGEF11, ARHGEF12, ATM, ATR, AURKA, BAD, BCL2, BCL2L1, BIRC2, BIRC3, BMPR2, BRCA1, CASP10, CASP3, CASP6, CASP7, CASP8, CCND1, CCND2, CCNE1, CDC25A, CDC42, CDH1, CDK1, CDK2, CDK3, CDK4, CDK5, CDK6, CDKN1B, CDKN2A, CDKN2B, CDKN2C, CDKN2D, CHEK1, CREBBP, CRK, CTNNA1, CTNNB1, CTNND1, CYCS, E2F1, E2F5, ELK1, EP300, FOS, FOXO1, FZD1, FZD5, GNA14, GNAI2, GNB1, GNB2, GNB5, GRB2…
Glucocorticoid Receptor Signaling	1.25893e-30	0.227	132	A2M, ACTB, ADRB2, AKT1, AR, ARID1A, BCL2, BCL2L1, BRCA1, CCL13, CCL2, CCL3, CCL5, CEBPA, CHUK, CREB1, CREBBP, CREBZF, CXCL8, DNAH1, EGFR, ELK1, EP300, ESR1, FOS, FOXO3, GABPA, GRB2, GTF2A1, GTF2B, GTF2F2, H3-3A/H3-3B, H3-4, H3C14, HMGB1, IKBKB, IL7R, IRF3, JAK1, JUN, KAT2B, KRT1, KRT13, KRT15, KRT16, KRT17, KRT18, KRT19, KRT25, KRT26, KRT27, KRT28, KRT3, KRT31, KRT34, KRT35, KRT36, KRT38, KRT4, K…
Senescence Pathway	1.58489e-30	0.303	90	ACVR2B, AKT1, ANAPC2, ARAF, ATM, ATR, BHLHE40, BMPR2, CACNA1A, CALM1 (includes others), CBX8, CCNB1, CCND1, CCND2, CCNE1, CDC25A, CDK1, CDK2, CDK4, CDK6, CDKN1B, CDKN2A, CDKN2B, CEBPB, CHEK1, CHUK, CREBBP, CXCL8, E2F1, E2F5, EED, EIF4EBP1, ELF3, EP300, ETS1, ETS2, EZH2, FOXO3, GADD45G, GATA4, HBP1, IKBKB, ING1, IRF3, ITSN2, JUN, KAT2B, MAP2K1, MAP2K4, MAP2K5, MAPK1, MAPK14, MAPK3, MDM2, MRE11, MT…
HER-2 Signaling in Breast Cancer	5.01187e-26	0.342	67	AKT1, ARAF, ARF1, ARF6, BAD, CASP3, CASP6, CASP7, CCND1, CCNE1, CDC42, CDK4, CDKN1B, CHUK, COPS6, EGFR, ELF3, ELK1, ERBB2, ERBB3, ETS1, ETS2, FOS, FOXO1, FOXO3, GRB2, GSK3B, HBEGF, IKBKB, JUN, MAP2K1, MAPK1, MAPK3, MDM2, MLST8, MTOR, MYC, NFKB1, NFKB2, NFKBIA, PARD3, PGR, PIK3R1, PIK3R3, PRKCA, PRKCB, PRKCD, PRKCI, PRKCZ, PTEN, RAP1B, RB1, REL, RELA, RHEB, RPS6KB1, RPS6KB2, RPTOR, SMAD3, SMAD4, S…
p53 Signaling	1.25893e-24	0.469	46	AKT1, ATM, ATR, BCL2, BCL2L1, BRCA1, CASP6, CCND1, CCND2, CDK2, CDK4, CDKN2A, CHEK1, CTNNB1, E2F1, EP300, GADD45G, GNL3, GSK3B, HDAC1, HIF1A, JMY, JUN, KAT2B, MAPK14, MAPK8, MDM2, MDM4, PCNA, PIAS1, PIK3R1, PIK3R3, PLAGL1, PML, PRKDC, PTEN, RB1, SFN, SIRT1, ST13, THBS1, TNFRSF10B, TP53, TP63, TP73, TRIM29
RAR Activation	1.58489e-24	0.332	65	ACTB, AKT1, ARID1A, CARM1, CITED2, CREBBP, CSNK2A1, CSNK2B, EP300, FOS, JUN, KAT2B, MAP2K1, MAP2K4, MAP3K5, MAPK1, MAPK14, MAPK8, MAPK9, NCOA1, NCOR1, NFKB1, NFKB2, NR2F1, NR2F2, NR2F6, PBRM1, PDPK1, PIK3R1, PIK3R3, PML, PPARGC1A, PRKACA, PRKCA, PRKCB, PRKCD, PRKCI, PRKCZ, PRMT1, PRMT2, PTEN, RAC1, RARA, RARB, RARG, RDH5, REL, RELA, RXRA, RXRB, SMAD1, SMAD2, SMAD3, SMAD4, SMAD5, SMAD7, SMARCB1, S…
Pancreatic Adenocarcinoma Signaling	7.94328e-23	0.397	50	ABL1, AKT1, BAD, BCL2, BCL2L1, CCND1, CCNE1, CDC42, CDK2, CDK4, CDKN1B, CDKN2A, CDKN2B, E2F1, E2F5, EGFR, ELK1, ERBB2, GRB2, HBEGF, HDAC1, HDAC3, HDAC5, HDAC6, JAK1, MAP2K1, MAP2K4, MAPK1, MAPK3, MAPK8, MAPK9, MDM2, NFKB1, NFKB2, NOTCH1, PIK3R1, PIK3R3, PLD2, RAC1, RB1, REL, RELA, SMAD2, SMAD3, SMAD4, STAT1, STAT3, SUV39H1, TGFBR1, TP53
Cell Cycle: G1/S Checkpoint Regulation	1e-21	0.529	36	ABL1, ATM, ATR, BTRC, CCND1, CCND2, CCNE1, CDC25A, CDK2, CDK4, CDK6, CDKN1B, CDKN2A, CDKN2B, CDKN2C, CDKN2D, E2F1, E2F5, FBXL5, FOXO1, GNL3, GSK3B, HDAC1, HDAC3, HDAC5, HDAC6, MAX, MDM2, MYC, RB1, RPL5, SKP2, SMAD3, SMAD4, SUV39H1, TP53
Sumoylation Pathway	1e-21	0.427	44	AR, ARHGDIA, CDC42, CDH1, CEBPA, CREBBP, CTBP1, CTBP2, EP300, ETS1, FOS, HDAC1, JUN, KDM1A, MAP2K4, MAP3K5, MAPK8, MAPK9, MDM2, MYB, NFKB1, NFKB2, NFKBIA, NR3C1, PCNA, PIAS1, PML, RAC1, RAN, RANGAP1, RHOA, RND1, SENP3, SERBP1, SIRT1, SMAD4, SP1, SP3, SUMO1, SUMO2, TDG, TP53, UBE2I, ZEB1
MSP-RON Signaling In Cancer Cells Pathway	1e-21	0.37	51	ACTA2, AKT1, ARAF, ARNT, ATF4, CCND1, CREB1, CREB3, CREBBP, CTNNB1, EGFR, ELF3, ETS1, ETS2, FLNA, FOS, GRB2, GSK3B, HIF1A, HNF1A, JUN, LEF1, MAP2K1, MAPK1, MAPK3, MTOR, MYC, NFKB1, NFKB2, NFKBIA, PIK3R1, PIK3R3, RAP1B, REL, RELA, SFN, SMAD2, SP1, SRC, ST14, STAT3, TCF3, TCF4, TCF7L2, VIM, YWHAB, YWHAE, YWHAG, YWHAH, YWHAQ, YWHAZ
Osteoarthritis Pathway	1.58489e-21	0.286	67	ADIPOQ, ALPI, ATF4, BMPR2, CASP1, CASP10, CASP3, CASP4, CASP6, CASP7, CASP8, CEBPB, CHUK, CREB1, CREB3, CREBBP, CTNNA1, CTNNB1, CXCL8, DDR2, DKK1, ELF3, EPAS1, FGFR1, FN1, FOXO3, FZD1, FZD5, GLIS2, HDAC3, HIF1A, HMGB1, HNF1A, HTRA1, LEF1, MEF2C, MTOR, NFKB1, NFKB2, NOTCH1, PPARD, PPARG, PPARGC1A, PRG4, PRKAA1, PRKAA2, PRKAB2, RAC1, REL, RELA, RUNX2, SDC4, SIRT1, SMAD1, SMAD2, SMAD3, SMAD4, SMAD5,…
Small Cell Lung Cancer Signaling	2.51189e-21	0.438	42	ABL1, AKT1, BCL2, BCL2L1, BIRC2, CCND1, CCND2, CCNE1, CDK2, CDK4, CDK6, CDKN1B, CDKN2B, CHUK, CYCS, E2F1, E2F5, HDAC1, HDAC3, HDAC5, HDAC6, IKBKB, MAX, MYC, NFKB1, NFKB2, NFKBIA, PIAS3, PIK3R1, PIK3R3, PTEN, RARB, RB1, REL, RELA, RXRA, RXRB, SKP2, SUV39H1, TP53, TRAF2, TRAF6
Endocannabinoid Cancer Inhibition Pathway	3.16228e-20	0.35	50	AKT1, ATF4, BAD, CASP1, CASP10, CASP3, CASP4, CASP6, CASP7, CASP8, CCND1, CCND2, CCNE1, CDH1, CDKN1B, CREB1, CREB3, CREBBP, CTNNB1, DDIT3, GNAI2, GSK3B, HIF1A, HNF1A, LEF1, MAP2K1, MAP2K4, MAP2K5, MAPK1, MAPK14, MAPK3, MLST8, MTOR, MYC, NOS3, NUPR1, PIK3R1, PIK3R3, PRKAA1, PRKAA2, PRKAB2, PRKACA, RHOA, RPTOR, SRC, TCF3, TCF4, TCF7L2, TWIST1, VIM
Prostate Cancer Signaling	3.16228e-20	0.393	44	ABL1, AKT1, AR, ATF4, BAD, BCL2, CCND1, CCNE1, CDK2, CDKN1B, CHUK, CREB1, CREB3, CREBBP, CTNNB1, E2F1, E2F5, FOXO1, GRB2, GSK3B, HDAC1, HDAC3, HDAC5, HDAC6, LEF1, MAP2K1, MAPK1, MAPK3, MDM2, MTOR, NFKB1, NFKB2, NFKBIA, NKX3-1, PDPK1, PIK3R1, PIK3R3, PTEN, RAP1B, RB1, REL, RELA, SUV39H1, TP53
Chronic Myeloid Leukemia Signaling	3.16228e-20	0.402	43	ABL1, AKT1, BAD, BCL2L1, CCND1, CCND2, CDK4, CDK6, CDKN1B, CDKN2A, CHUK, CRK, CTBP1, CTBP2, E2F1, E2F5, GRB2, HDAC1, HDAC3, HDAC5, HDAC6, IKBKB, MAP2K1, MAPK1, MAPK3, MDM2, MECOM, MYC, NFKB1, NFKB2, PIK3R1, PIK3R3, RAP1B, RB1, REL, RELA, SMAD3, SMAD4, STAT5A, STAT5B, SUV39H1, TGFBR1, TP53
Hepatic Fibrosis Signaling Pathway	3.98107e-20	0.217	91	ACTA2, ACVR2B, AKT1, ARAF, ATF4, BCL2, BMPR2, CACNA1A, CALM1 (includes others), CASP3, CCL2, CCL3, CCL5, CCND1, CD40, CDC42, CDKN1B, CEBPB, CHUK, CREB1, CREB3, CREBBP, CSNK1A1, CTNNB1, CXCL8, ELK1, EZH2, FGFR1, FOS, FOXO1, FZD1, FZD5, GLIS2, GNAI2, GSK3B, HIF1A, HNF1A, IKBKB, IRS2, JAK1, JUN, LEF1, MAP2K1, MAP2K4, MAP2K5, MAPK1, MAPK14, MAPK3, MAPK8, MAPK9, MTOR, MYC, MYL9, NFKB1, NFKB2, NFKBIA, …
Adipogenesis pathway	6.30957e-20	0.356	48	AKT1, ARNTL, BMPR2, CDK5, CEBPA, CEBPB, CEBPD, CLOCK, CTBP1, CTBP2, CTNNB1, DDIT3, EZH2, FBXW7, FGFR1, FGFR4, FOXO1, FZD1, FZD5, HDAC1, HDAC3, HDAC5, HDAC6, HIF1A, KAT2A, KAT2B, KDM1A, KLF5, KMT2B, NR2F2, PAXIP1, PPARG, RB1, RPS6KA1, RPS6KB1, RUNX1T1, SAP130, SETDB1, SIRT1, SIRT2, SMAD1, SMAD3, SMAD5, SOX9, SREBF1, STAT5B, TP53, WNT5A
Estrogen Receptor Signaling	1.25893e-19	0.218	88	AKT1, ATF4, BAD, BCL2, CACNA1A, CARM1, CCND1, CFL1, CREB1, CREB3, CREBBP, CTBP1, CTBP2, DDX5, DLG4, EGFR, EIF4EBP1, EP300, ESR1, ESR2, FOS, FOXO1, FOXO3, GNA14, GNAI2, GNB1, GNB2, GNB5, GPS2, GRB2, GSK3B, HDAC3, HIF1A, JAK1, JUN, LIMK2, MAP2K1, MAPK1, MAPK3, MED10, MED4, MTOR, MYC, MYL9, NCOA1, NCOA2, NCOA3, NCOR1, NDUFA9, NDUFB7, NDUFS8, NFKB1, NFKB2, NOS3, NOTCH1, NR3C1, PCNA, PELP1, PGR, PIK3R…
Coronavirus Pathogenesis Pathway	1e-18	0.286	58	ABL1, AR, ATF4, BCL2, CASP1, CASP3, CASP8, CCL2, CCL5, CCND1, CCNE1, CDK2, CDK4, CHUK, CXCL8, DDIT3, E2F1, E2F5, EEF1A1, ELK1, EP300, FOS, HDAC1, HDAC3, HDAC5, HDAC6, HIF1A, IKBKB, IRF3, IRF7, JAK1, JUN, MAP2K4, MAPK1, MAPK14, MAPK3, MAPK8, MAPK9, NFKB1, NFKB2, NFKBIA, NPM1, NUP98, RB1, REL, RELA, RIPK1, RPS15, RPS24, RPS4Y1, SMAD3, SMAD4, STAT1, STAT2, STAT3, SUV39H1, TGFBR1, TP53
14-3-3-mediated Signaling	1.25893e-18	0.354	45	AKT1, BAD, CDKN1B, ELK1, FOS, FOXO1, GFAP, GRB2, GSK3B, JUN, MAP2K1, MAP2K4, MAP3K5, MAPK1, MAPK3, MAPK8, MAPK9, MAPT, PIK3R1, PIK3R3, PRKCA, PRKCB, PRKCD, PRKCI, PRKCZ, RAP1B, RPS6KA1, SFN, SRC, SRPK2, TP73, TRAF2, TSC1, TSC2, TUBA1B, TUBB, TUBB3, TUBB4B, VIM, YWHAB, YWHAE, YWHAG, YWHAH, YWHAQ, YWHAZ
BEX2 Signaling Pathway	1e-17	0.432	35	AKT1, BAD, BCL2, BEX2, CCND1, CTNNB1, ERBB2, GSK3B, HIF1A, HNF1A, JUN, LEF1, LMO2, MAP2K4, MAPK8, MAPK9, MTOR, NFKB1, NFKB2, NFKBIA, PLXNC1, PPP2R5C, PPP2R5E, PTEN, PTPA, REL, RELA, SMARCB1, SPP1, STAT3, TCF3, TCF4, TCF7L2, TSC1, TSC2
Autophagy	1e-17	0.272	58	AKT1, ARNT, ATF4, ATM, ATR, BAD, BCL2, BECN1, CALM1 (includes others), CDKN1B, CREB1, CREB3, CREBBP, DDIT3, E2F1, ERN1, FOS, FOXO1, FOXO3, GORASP2, GSK3B, HIF1A, IRS1, IRS2, JUN, KAT5, MAP2K1, MAP2K4, MAPK1, MAPK3, MAPK8, MAPK9, MLST8, MTOR, MYC, NFKB1, NFKB2, NRBF2, PDGFB, PIK3R1, PIK3R3, PPP2R5C, PPP2R5E, PRKAA1, PRKAA2, PRKAB2, PRKACA, PTEN, PTPA, RIPK1, RPTOR, SIRT1, TP53, TRAF6, TSC1, TSC2, …
B Cell Receptor Signaling	1e-17	0.284	55	ABL1, AKT1, APBB1IP, ATF4, BAD, BCL2L1, BCL6, CALM1 (includes others), CD79A, CDC42, CFL1, CHUK, CREB1, CREB3, CREBBP, EGR1, ELK1, ETS1, FOXO1, GRB2, GSK3B, IKBKB, JUN, MAP2K1, MAP2K4, MAP3K12, MAP3K14, MAP3K5, MAP3K8, MAPK1, MAPK14, MAPK3, MAPK8, MAPK9, MEF2C, MTOR, NFATC1, NFATC2, NFKB1, NFKB2, NFKBIA, PAX5, PDPK1, PIK3R1, PIK3R3, PRKCB, PTEN, RAC1, RAP1B, REL, RELA, RPS6KB1, RPS6KB2, SYK, TCF3
ILK Signaling	3.16228e-17	0.278	55	ACTA2, ACTB, ACTN1, AKT1, ATF4, CASP3, CCND1, CDC42, CDH1, CFL1, CREB1, CREB3, CREBBP, CTNNB1, DSP, FLNA, FLNB, FN1, FOS, GSK3B, HIF1A, IRS1, IRS2, JUN, KRT18, LEF1, LIMS1, MAP2K4, MAPK1, MAPK3, MAPK8, MAPK9, MTOR, MUC1, MYC, MYL9, NCK2, NFKB1, NFKB2, PDPK1, PIK3R1, PIK3R3, PPP2R5C, PPP2R5E, PTEN, PTPA, RAC1, REL, RELA, RHOA, RND1, RPS6KA5, SNAI1, TGFB1I1, VIM
ERK/MAPK Signaling	6.30957e-17	0.266	57	ARAF, ATF4, BAD, CREB1, CREB3, CREBBP, CRK, EIF4EBP1, ELF3, ELK1, ESR1, ETS1, ETS2, FOS, GRB2, H3-3A/H3-3B, H3-4, H3C14, HSPB1, LAMTOR3, MAP2K1, MAPK1, MAPK3, MYC, NFATC1, PAK2, PIK3R1, PIK3R3, PLA2G12B, PLA2G5, PPARG, PPP1CA, PPP1CB, PPP1CC, PPP1R3A, PPP1R7, PPP2R5C, PPP2R5E, PRKACA, PRKCA, PRKCB, PRKCD, PRKCI, PTPA, RAC1, RAP1B, RPS6KA1, RPS6KA5, SRC, SRF, STAT1, STAT3, YWHAB, YWHAG, YWHAH, YWH…
Cell Cycle: G2/M DNA Damage Checkpoint Regulation	6.30957e-17	0.54	27	ABL1, ATM, ATR, AURKA, BRCA1, BTRC, CCNB1, CDK1, CDKN2A, CHEK1, EP300, FBXL5, KAT2B, MDM2, MDM4, PLK1, PRKDC, RPS6KA1, SFN, SKP2, TP53, YWHAB, YWHAE, YWHAG, YWHAH, YWHAQ, YWHAZ
Regulation of the Epithelial-Mesenchymal Transition Pathway	6.30957e-17	0.277	54	AKT1, APH1A, APH1B, ARAF, CDH1, CTNNB1, EGFR, EGR1, ETS1, FGF11, FGF13, FGFR1, FGFR4, FZD1, FZD5, GRB2, GSK3B, HIF1A, HNF1A, JAK1, LEF1, MAML1, MAP2K1, MAP2K4, MAP2K5, MAPK1, MAPK3, NCSTN, NFKB1, NFKB2, NOTCH1, NOTCH2, NOTCH3, NOTCH4, PIK3R1, PIK3R3, PSEN1, PSENEN, RAP1B, REL, RELA, RHOA, SMAD2, SMAD3, SMAD4, SNAI1, STAT3, TCF3, TCF4, TCF7L2, TGFBR1, TWIST1, WNT5A, ZEB1
Sirtuin Signaling Pathway	6.30957e-17	0.233	68	ADAM10, AKT1, APEX1, APP, ARNTL, BECN1, CDH1, CLOCK, CPS1, CXCL8, E2F1, EPAS1, EPO, ESRRA, FOXO1, FOXO3, GABPA, GADD45G, GSK3B, H1-1, H1-3, H3-3A/H3-3B, H3-4, H3C14, HIF1A, JUN, KAT2A, MAPK1, MAPK3, MTOR, MYC, NBN, NDUFA9, NDUFB7, NDUFS8, NEDD4, NFKB1, NFKB2, NOS3, NQO1, NR1H2, NR1H3, NR1H4, PCK2, POLR1C, POLR3D, PPARA, PPARG, PPARGC1A, PRKAA1, PRKAA2, PRKDC, RARB, REL, RELA, RPTOR, SIRT1, SIRT2,…
ERK5 Signaling	7.94328e-17	0.444	32	AKT1, ATF4, BAD, CREB1, CREB3, CREBBP, CTF1, EGFR, FOS, FOSL1, FOXO3, MAP2K5, MAP3K8, MEF2A, MEF2C, MEF2D, MYC, RAP1B, RPS6KA1, RPS6KA5, RPS6KB1, RPS6KB2, SFN, SH2D2A, SRC, WNK1, YWHAB, YWHAE, YWHAG, YWHAH, YWHAQ, YWHAZ
UVB-Induced MAPK Signaling	1.99526e-16	0.519	27	AKT1, BAD, EGFR, EIF4EBP1, FOS, H3-3A/H3-3B, H3-4, H3C14, JUN, MAP2K1, MAP2K4, MAPK1, MAPK14, MAPK3, MAPK8, MAPK9, MTOR, PIK3R1, PIK3R3, PRKCA, PRKCB, PRKCD, PRKCI, PRKCZ, RPS6KA5, RPS6KB1, TP53
HOTAIR Regulatory Pathway	2.51189e-16	0.294	48	AGO1, AGO2, AKT1, AR, ATXN1, CDH1, CREBBP, CTNNB1, DNMT3B, EED, EP300, ERBB2, ESR1, ESR2, EZH2, H3-3A/H3-3B, H3-4, H3C14, HDAC1, HNF1A, HOXD10, IRF1, KDM1A, KMT2A, KMT2C, LEF1, MDM2, MYC, NFKB1, NFKB2, NFKBIA, PIK3R1, PIK3R3, PTEN, REL, RELA, SETDB1, SNUPN, SPP1, SRF, STAT3, TCF3, TCF4, TCF7L2, TWIST1, VIM, WNT5A, YY1
Apelin Endothelial Signaling Pathway	2.51189e-16	0.317	44	AKT1, ARNT, CALM1 (includes others), CCL2, FOS, GNA14, GNAI2, GNB1, GNB2, GNB5, HDAC5, HIF1A, JUN, KLF2, MAP2K1, MAP2K4, MAPK1, MAPK3, MAPK8, MAPK9, MEF2A, MEF2C, MEF2D, MTOR, NFKB1, NFKB2, NOS3, PIK3R1, PIK3R3, PRKAA1, PRKAA2, PRKAB2, PRKCA, PRKCB, PRKCD, PRKCI, PRKCZ, RAP1B, REL, RELA, RPS6KB1, RPS6KB2, SMAD3, SP1
Aryl Hydrocarbon Receptor Signaling	5.01187e-16	0.296	47	AHR, ARNT, ATM, ATR, CCND1, CCND2, CCNE1, CDK2, CDK4, CDK6, CDKN1B, CDKN2A, CHEK1, CYP2C18, CYP2C8, DCT, E2F1, EP300, ESR1, ESR2, FOS, GSTZ1, HSPB1, JUN, MAPK1, MAPK3, MAPK8, MDM2, MYC, NCOA2, NCOA3, NFKB1, NFKB2, NQO1, NR2F1, RARA, RARB, RARG, RB1, REL, RELA, RXRA, RXRB, SP1, SRC, TP53, TP73
Acute Myeloid Leukemia Signaling	5.01187e-16	0.385	35	AKT1, ARAF, BAD, CCND1, CEBPA, EIF4EBP1, GRB2, HNF1A, JUP, LEF1, MAP2K1, MAP2K4, MAP2K5, MAPK1, MAPK3, MTOR, MYC, NFKB1, NFKB2, PIK3R1, PIK3R3, PML, RAP1B, RARA, REL, RELA, RPS6KB1, RPS6KB2, RUNX1, STAT3, STAT5A, STAT5B, TCF3, TCF4, TCF7L2
NGF Signaling	5.01187e-16	0.339	40	AKT1, ATF4, CDC42, CHUK, CREB1, CREB3, CREBBP, CRK, ELK1, GRB2, IKBKB, MAP2K1, MAP2K4, MAP3K12, MAP3K14, MAP3K5, MAP3K8, MAPK1, MAPK3, MAPK8, MAPK9, NFKB1, NFKB2, PDPK1, PIK3R1, PIK3R3, PRKCD, PRKCZ, RAC1, RAP1B, REL, RELA, RHOA, RPS6KA1, RPS6KA5, RPS6KB1, RPS6KB2, SHC3, TP53, TRAF6
ATM Signaling	6.30957e-16	0.371	36	ABL1, ATF4, ATM, ATR, BRCA1, CCNB1, CDC25A, CDK1, CDK2, CHEK1, CREB1, CREB3, CREBBP, GADD45G, JUN, KAT5, MAP2K4, MAPK14, MAPK8, MAPK9, MDC1, MDM2, MDM4, MRE11, NBN, NFKBIA, PPP1CC, PPP2R5C, PPP2R5E, PTPA, RAD50, SUV39H1, TP53, TP53BP1, TP73, ZEB1
IGF-1 Signaling	1.25893e-15	0.356	37	AKT1, BAD, CSNK2A1, CSNK2B, ELK1, FOS, FOXO1, FOXO3, GRB2, IGFBP2, IRS1, IRS2, JAK1, JUN, MAP2K1, MAPK1, MAPK3, MAPK8, NEDD4, PDPK1, PIK3R1, PIK3R3, PRKACA, PRKCI, PRKCZ, RAP1B, RPS6KB1, RPS6KB2, SFN, SRF, STAT3, YWHAB, YWHAE, YWHAG, YWHAH, YWHAQ, YWHAZ
Cyclins and Cell Cycle Regulation	1.58489e-15	0.393	33	ABL1, ATM, ATR, BTRC, CCNB1, CCND1, CCND2, CCNE1, CDC25A, CDK1, CDK2, CDK4, CDK6, CDKN1B, CDKN2A, CDKN2B, CDKN2C, CDKN2D, E2F1, E2F5, FBXL5, GSK3B, HDAC1, HDAC3, HDAC5, HDAC6, PPP2R5C, PPP2R5E, PTPA, RB1, SKP2, SUV39H1, TP53
Regulation Of The Epithelial Mesenchymal Transition By Growth Factors Pathway	2.51189e-15	0.266	51	AKT1, ARAF, CDC42, CDH1, CHUK, EGFR, EGR1, ERBB2, ETS1, FGF11, FGF13, FGFR1, FGFR4, FOS, FOXO1, GRB2, GSK3B, IKBKB, JAK1, JUN, LATS2, MAP2K1, MAP2K4, MAP2K5, MAPK1, MAPK14, MAPK3, MAPK8, MAPK9, MTOR, NFKB1, NFKB2, PDGFB, PIK3R1, PIK3R3, RAC1, RAP1B, REL, RELA, RHOA, SHC3, SMAD2, SMAD3, SMAD4, SNAI1, STAT3, TCF3, TGFBR1, TWIST1, VIM, ZEB1
PI3K/AKT Signaling	2.51189e-15	0.261	52	AKT1, BAD, BCL2, BCL2L1, CCND1, CDKN1B, CHUK, CTNNB1, EIF4EBP1, FOXO1, FOXO3, GRB2, GSK3B, IKBKB, IL7R, JAK1, LIMS1, MAP2K1, MAP3K5, MAP3K8, MAPK1, MAPK3, MCL1, MDM2, MTOR, NFKB1, NFKB2, NFKBIA, NOS3, PDPK1, PIK3R1, PIK3R3, PPP2R5C, PPP2R5E, PTEN, PTPA, RAP1B, REL, RELA, RHEB, RPS6KB1, RPS6KB2, SFN, TP53, TSC1, TSC2, YWHAB, YWHAE, YWHAG, YWHAH, YWHAQ, YWHAZ
Hereditary Breast Cancer Signaling	3.16228e-15	0.303	43	ACTB, AKT1, ARID1A, ATM, ATR, BARD1, BRCA1, CCNB1, CCND1, CCND2, CDK1, CDK4, CDK6, CHEK1, CREBBP, E2F1, EP300, FAAP100, GADD45G, HDAC1, HDAC3, HDAC5, HDAC6, MLH1, MRE11, MSH6, NBN, NPM1, PBRM1, PIK3R1, PIK3R3, POLR2G, PTEN, RAD50, RAP1B, RB1, SFN, SMARCB1, SMARCC1, SMARCE1, TP53, UBC, UBD
Wnt/β-catenin Signaling	1.25893e-14	0.272	47	ACVR2B, AKT1, APPL2, BMPR2, BTRC, CCND1, CDH1, CDH5, CDKN2A, CREBBP, CSNK1A1, CSNK2A1, CSNK2B, CTNNB1, DKK1, EP300, FZD1, FZD5, GSK3B, HDAC1, HNF1A, JUN, LEF1, MDM2, MYC, NR5A2, PIN1, PPARD, PPP2R5C, PPP2R5E, PTPA, RARA, RARB, RARG, RUVBL2, SOX4, SOX9, SRC, TCF3, TCF4, TCF7L2, TGFBR1, TLE1, TP53, UBC, UBD, WNT5A
LPS-stimulated MAPK Signaling	1.99526e-14	0.376	32	CDC42, CHUK, CREB1, ELK1, FOS, IKBKB, JUN, LBP, MAP2K1, MAP2K4, MAP3K14, MAP3K5, MAPK1, MAPK14, MAPK3, MAPK8, MAPK9, NFKB1, NFKB2, NFKBIA, PIK3R1, PIK3R3, PRKCA, PRKCB, PRKCD, PRKCI, PRKCZ, RAC1, RAP1B, REL, RELA, SRF
RANK Signaling in Osteoclasts	2.51189e-14	0.363	33	AKT1, BIRC2, BIRC3, CALM1 (includes others), CHUK, ELK1, FOS, IKBKB, JUN, MAP2K1, MAP2K4, MAP3K12, MAP3K14, MAP3K5, MAP3K8, MAPK1, MAPK14, MAPK3, MAPK8, MAPK9, MITF, NFATC1, NFATC2, NFKB1, NFKB2, NFKBIA, PIK3R1, PIK3R3, REL, RELA, SRC, TRAF2, TRAF6
Erythropoietin Signaling Pathway	3.16228e-14	0.266	47	AKT1, ARNT, BAD, BCL2L1, BIRC2, BIRC3, CCND1, CCND2, CTNNB1, CXCL8, ELK1, EPO, FOS, FOXO3, GRB2, GSK3B, HBA1/HBA2, HIF1A, IRS2, JUN, MAP2K1, MAPK1, MAPK3, MDM2, MTOR, NFKB1, NFKB2, NFKBIA, NOS3, PDPK1, PIK3R1, PIK3R3, PRKCA, PRKCB, PRKCD, PRKCI, PRKCZ, RAC1, RAP1B, REL, RELA, RPS6KB1, SHC3, SRC, STAT5A, STAT5B, TP53
Neuroinflammation Signaling Pathway	3.98107e-14	0.21	66	ACVR2B, AKT1, APH1A, APH1B, APP, ATF4, BACE1, BCL2, BIRC2, BIRC3, BMPR2, CASP1, CASP3, CASP8, CCL2, CCL3, CCL5, CD40, CHUK, CREB1, CREB3, CREBBP, CTNNB1, CXCL12, CXCL8, FOS, FZD1, GABRB1, GAD2, GLUL, GSK3B, HMGB1, IKBKB, IRF3, IRF7, JAK1, JUN, MAP2K4, MAPK1, MAPK14, MAPK3, MAPK8, MAPK9, MAPT, NCSTN, NFATC1, NFATC2, NFKB1, NFKB2, PIK3R1, PIK3R3, PLA2G12B, PLA2G5, PSEN1, PSENEN, RAC1, REL, RELA, RI…
Epithelial Adherens Junction Signaling	3.98107e-14	0.278	44	ACTA2, ACTB, ACTN1, ACVR2B, AKT1, ARPC3, BMPR2, CDC42, CDH1, CRK, CTNNA1, CTNNB1, CTNND1, DLL1, EGFR, FER, FGFR1, HNF1A, JUP, LEF1, MAGI1, MAGI2, MYL9, NOTCH1, NOTCH2, NOTCH3, NOTCH4, PARD3, PTEN, RAC1, RAP1B, RHOA, SNAI1, SRC, SSX2IP, TCF3, TCF4, TCF7L2, TGFBR1, TUBA1B, TUBB, TUBB3, TUBB4B, YES1
PPARα/RXRα Activation	5.01187e-14	0.254	49	ACVR2B, ADIPOQ, BCL3, BMPR2, CHUK, CLOCK, CREBBP, CYP2C18, CYP2C8, EP300, GNA14, GRB2, IKBKB, IRS1, JUN, MAP2K1, MAP2K4, MAP3K14, MAPK1, MAPK14, MAPK3, MAPK8, MEF2C, NCOA3, NCOA6, NCOR1, NFKB1, NFKB2, NFKBIA, NR2F1, PPARA, PPARGC1A, PRKAA1, PRKAA2, PRKAB2, PRKACA, PRKCA, PRKCB, RAP1B, REL, RELA, RXRA, SMAD2, SMAD3, SMAD4, STAT5B, TGFBR1, TGS1, TRAF6
VDR/RXR Activation	6.30957e-14	0.385	30	CCL5, CDKN1B, CEBPA, CEBPB, CSNK2A1, EP300, FOXO1, GTF2B, HOXA10, HR, KLF4, MXD1, NCOA1, NCOA2, NCOA3, NCOR1, PPARD, PRKCA, PRKCB, PRKCD, PRKCI, PRKCZ, RUNX2, RXRA, RXRB, SP1, SPP1, SULT2A1, VDR, YY1
Non-Small Cell Lung Cancer Signaling	6.30957e-14	0.351	33	ABL1, AKT1, BAD, CCND1, CCND2, CDK4, CDK6, CDKN2A, E2F1, E2F5, EGFR, ERBB2, FOXO3, GRB2, HDAC1, HDAC3, HDAC5, HDAC6, MAP2K1, MAPK1, MAPK3, PDPK1, PIK3R1, PIK3R3, PRKCA, RAP1B, RARB, RASSF1, RB1, RXRA, RXRB, SUV39H1, TP53
ErbB Signaling	6.30957e-14	0.351	33	AKT1, CDC42, EGFR, ELK1, ERBB2, ERBB3, FOS, FOXO1, GRB2, GSK3B, HBEGF, JUN, MAP2K1, MAP2K4, MAPK1, MAPK14, MAPK3, MAPK8, MAPK9, MTOR, NCK2, NRG2, PAK2, PDPK1, PIK3R1, PIK3R3, PRKCA, PRKCB, PRKCD, PRKCI, PRKCZ, RAP1B, RPS6KB1
Neuregulin Signaling	6.30957e-14	0.316	37	AKT1, BAD, CDK5, CDKN1B, CRK, DLG4, EGFR, ELK1, ERBB2, ERBB3, ERBIN, GRB2, GRB7, HBEGF, MAP2K1, MAPK1, MAPK3, MTOR, MYC, NRG2, PDPK1, PIK3R1, PIK3R3, PRKCA, PRKCB, PRKCD, PRKCI, PRKCZ, PSEN1, PTEN, RAP1B, RNF41, RPS6KB1, RPS6KB2, SRC, STAT5A, STAT5B
PTEN Signaling	1.25893e-13	0.28	42	AKT1, BAD, BCL2, BCL2L1, BMPR2, CASP3, CCND1, CDC42, CDKN1B, CHUK, CSNK2A1, CSNK2B, EGFR, FGFR1, FGFR4, FOXO1, FOXO3, GRB2, GSK3B, IKBKB, MAGI1, MAGI2, MAGI3, MAP2K1, MAPK1, MAPK3, MAST2, NFKB1, NFKB2, PDPK1, PIK3R1, PIK3R3, PRKCZ, PTEN, RAC1, RAP1B, REL, RELA, RPS6KB1, RPS6KB2, TGFBR1, YWHAH
TGF-β Signaling	1.25893e-13	0.344	33	ACVR2B, BCL2, BMPR2, CDC42, CREBBP, EP300, FOS, FOXH1, GRB2, HDAC1, HNF4A, IRF7, JUN, MAP2K1, MAP2K4, MAPK1, MAPK14, MAPK3, MAPK8, MAPK9, RAP1B, RUNX2, RUNX3, SMAD1, SMAD2, SMAD3, SMAD4, SMAD5, SMAD7, TGFBR1, TRAF6, VDR, ZFYVE9
Production of Nitric Oxide and Reactive Oxygen Species in Macrophages	1.25893e-13	0.251	48	AKT1, APOE, CDC42, CHUK, CREBBP, FOS, HOXA10, IKBKB, IRF1, JAK1, JUN, MAP2K1, MAP2K4, MAP3K12, MAP3K14, MAP3K5, MAP3K8, MAPK1, MAPK14, MAPK3, MAPK8, MAPK9, NFKB1, NFKB2, NFKBIA, PIK3R1, PIK3R3, PPARA, PPP1CA, PPP1CB, PPP1CC, PPP1R3A, PPP1R7, PPP2R5C, PPP2R5E, PRKCA, PRKCB, PRKCD, PRKCI, PRKCZ, PTPA, RAC1, RAP1B, REL, RELA, RHOA, RND1, STAT1
p70S6K Signaling	1.25893e-13	0.295	39	AKT1, BAD, CD79A, EEF2, EEF2K, EGFR, F2RL1, F2RL2, GNAI2, GRB2, IRS1, JAK1, MAP2K1, MAPK1, MAPK3, MAPT, MTOR, PDPK1, PIK3R1, PIK3R3, PPP2R5C, PPP2R5E, PRKCA, PRKCB, PRKCD, PRKCI, PRKCZ, PTPA, RAP1B, RPS6KB1, SFN, SRC, SYK, YWHAB, YWHAE, YWHAG, YWHAH, YWHAQ, YWHAZ
Glioblastoma Multiforme Signaling	1.58489e-13	0.263	45	AKT1, CCND1, CCND2, CCNE1, CDC42, CDK2, CDK4, CDK6, CDKN1B, CDKN2A, CTNNB1, E2F1, E2F5, EGFR, FOXO1, FZD1, FZD5, GRB2, GSK3B, LEF1, MAP2K1, MAPK1, MAPK3, MDM2, MTOR, MYC, NF2, PDGFB, PIK3R1, PIK3R3, PRKCD, PTEN, RAC1, RAP1B, RB1, RHOA, RND1, RPS6KB1, SHC3, SRC, TCF3, TP53, TSC1, TSC2, WNT5A
AMPK Signaling	1.58489e-13	0.227	55	ACTB, ADIPOQ, ADRB2, AKT1, ARID1A, ATF4, CCND1, CREB1, CREB3, CREBBP, EEF2, EEF2K, EIF4EBP1, EP300, FOXO1, FOXO3, GNA14, GNAI2, GNB1, GNB2, GNB5, HNF4A, IRS1, IRS2, KAT2B, MAPK1, MAPK14, MLST8, MTOR, NOS3, PBRM1, PCK2, PHLPP1, PIK3R1, PIK3R3, PPARGC1A, PPM1B, PPM1G, PPP2R5C, PPP2R5E, PRKAA1, PRKAA2, PRKAB2, PRKACA, PTPA, RAB11A, RAB3A, RPS6KB1, RPTOR, SIRT1, SMARCB1, SMARCC1, SMARCE1, TSC1, TSC2
Opioid Signaling Pathway	3.16228e-13	0.214	59	AKT1, AP2B1, ATF4, BAD, CACNA1A, CALM1 (includes others), CDC42, CDKN1B, CLTC, CREB1, CREB3, CREBBP, CTNNB1, ELK1, EP300, FOS, FOSB, GNA14, GNAI2, GNB1, GNB2, GNB5, GSK3B, HNF1A, LEF1, MAP2K1, MAP2K4, MAP2K5, MAPK1, MAPK3, MYC, NFKB1, NFKB2, NFKBIA, NOS3, PDYN, PLD2, POMC, PRKACA, PRKCA, PRKCB, PRKCD, PRKCI, PRKCZ, RAC1, RAP1B, RGS1, RPS6KA1, RPS6KA5, RPS6KB1, RPS6KB2, RYR2, SLC12A5, SRC, SRF, TC…
IL-7 Signaling Pathway	3.98107e-13	0.372	29	AKT1, BAD, BCL2, BCL6, CCND1, CDC25A, CDK2, CDKN1B, CXCR5, FOXO1, FOXO3, GRB2, GSK3B, IL7R, JAK1, JUN, MAPK1, MAPK14, MAPK3, MCL1, MYC, NFATC1, PAX5, PDPK1, PIK3R1, PIK3R3, STAT1, STAT5A, STAT5B
Glioma Signaling	3.98107e-13	0.298	37	ABL1, AKT1, CALM1 (includes others), CCND1, CCND2, CDK4, CDK6, CDKN2A, CDKN2B, CDKN2C, CDKN2D, E2F1, E2F5, EGFR, GRB2, HDAC1, HDAC3, HDAC5, HDAC6, MAP2K1, MAPK1, MAPK3, MDM2, MTOR, PDGFB, PIK3R1, PIK3R3, PRKCA, PRKCB, PRKCD, PRKCI, PRKCZ, PTEN, RAP1B, RB1, SUV39H1, TP53
IL-8 Signaling	3.98107e-13	0.237	50	AKT1, ARAF, BCL2, BCL2L1, CCND1, CCND2, CDC42, CDH1, CHUK, CXCL8, EGFR, EIF4EBP1, FOS, GNA14, GNAI2, GNB1, GNB2, GNB5, HBEGF, IKBKB, JUN, LASP1, LIMK2, MAP2K1, MAP2K4, MAPK1, MAPK3, MAPK8, MAPK9, MTOR, MYL9, NFKB1, NFKBIA, PAK2, PIK3R1, PIK3R3, PLD2, PRKCA, PRKCB, PRKCD, PRKCI, PRKCZ, RAC1, RAP1B, RELA, RHOA, RND1, RPS6KB1, SRC, TRAF6
PEDF Signaling	5.01187e-13	0.357	30	AKT1, BCL2, BCL2L1, CASP7, CASP8, CHUK, DOCK3, ELK1, HNF1A, IKBKB, MAPK1, MAPK14, MAPK3, NFKB1, NFKB2, NFKBIA, PIK3R1, PIK3R3, PPARG, RAC1, RAP1B, REL, RELA, RHOA, SRF, TCF12, TCF4, TCF7L2, TP53, ZEB1
Acute Phase Response Signaling	6.30957e-13	0.249	46	A2M, AKT1, C1R, CEBPB, CFB, CHUK, ECSIT, ELK1, FN1, FOS, GRB2, HAMP, HNF1A, HNRNPK, IKBKB, ITIH3, JUN, LBP, MAP2K1, MAP2K4, MAP3K14, MAP3K5, MAPK1, MAPK14, MAPK3, MAPK8, MAPK9, MTOR, NFKB1, NFKB2, NFKBIA, NR3C1, PDPK1, PIK3R1, PIK3R3, PLG, RAP1B, REL, RELA, RIPK1, STAT3, TCF3, TCF4, TRAF2, TRAF6, VWF
Protein Kinase A Signaling	6.30957e-13	0.184	74	AKAP9, ANAPC2, APEX1, ATF4, BAD, CALM1 (includes others), CDC25A, CHUK, CREB1, CREB3, CREBBP, CTNNB1, ELK1, FLNA, FLNB, GNAI2, GNB1, GNB2, GNB5, GSK3B, H1-1, H1-3, H3-3A/H3-3B, H3-4, H3C14, HNF1A, LEF1, MAP2K1, MAPK1, MAPK3, MYL9, NFATC1, NFATC2, NFKB1, NFKB2, NFKBIA, NOS3, PPP1CA, PPP1CB, PPP1CC, PPP1R3A, PPP1R7, PRKACA, PRKCA, PRKCB, PRKCD, PRKCI, PRKCZ, PTEN, PTPN3, PTPN5, PTPRG, RAP1B, REL, R…
HIPPO signaling	6.30957e-13	0.353	30	BTRC, DLG4, LATS2, NF2, PARD3, PPP1CA, PPP1CB, PPP1CC, PPP1R3A, PPP1R7, PPP2R5C, PPP2R5E, PTPA, RASSF1, SAV1, SFN, SKP2, SMAD1, SMAD2, SMAD3, SMAD4, SMAD5, TEAD1, TEAD2, YWHAB, YWHAE, YWHAG, YWHAH, YWHAQ, YWHAZ
FAT10 Cancer Signaling Pathway	6.30957e-13	0.46	23	ACVR2B, AKT1, BMPR2, CHUK, CTNNB1, EEF1A1, GSK3B, HOXB9, IKBKB, NFKB1, NFKB2, NFKBIA, PCNA, REL, RELA, SMAD2, SMAD3, SMAD4, STAT3, TCF7L2, TGFBR1, TP53, UBD
EGF Signaling	7.94328e-13	0.436	24	AKT1, CSNK2A1, CSNK2B, EGFR, ELK1, FOS, GRB2, JAK1, JUN, MAP2K1, MAP2K4, MAPK1, MAPK14, MAPK3, MAPK8, MTOR, PIK3R1, PIK3R3, PRKCA, RPS6KB1, SRC, SRF, STAT1, STAT3
ErbB2-ErbB3 Signaling	1e-12	0.4	26	AKT1, BAD, CCND1, CDKN1B, ELK1, ERBB2, ERBB3, ETV4, FOXO1, GRB2, GSK3B, JUN, MAP2K1, MAPK1, MAPK3, MYC, NRG2, PDPK1, PIK3R1, PIK3R3, PTEN, RAP1B, SP1, STAT3, STAT5A, STAT5B
Role of Macrophages, Fibroblasts and Endothelial Cells in Rheumatoid Arthritis	1.25893e-12	0.197	64	AKT1, ATF4, CALM1 (includes others), CCL2, CCL5, CCND1, CEBPA, CEBPB, CEBPD, CHUK, CREB1, CREB3, CREBBP, CSNK1A1, CTNNB1, CXCL12, CXCL8, DAAM1, DKK1, F2RL1, FN1, FOS, FZD1, FZD5, GSK3B, HNF1A, IKBKB, JUN, LEF1, MAP2K1, MAP2K4, MAP3K14, MAPK1, MAPK14, MAPK3, MAPK9, MYC, NFATC1, NFATC2, NFKB1, NFKBIA, PDGFB, PIK3R1, PIK3R3, PRKCA, PRKCB, PRKCD, PRKCI, PRKCZ, RAC1, RAP1B, RELA, RHOA, RIPK1, ROR2, SR…
Endocannabinoid Developing Neuron Pathway	1.58489e-12	0.293	36	AKT1, ARAF, ATF4, BRCA1, CCND1, CDKN1B, CREB1, CREB3, CREBBP, CTNNB1, GNAI2, GNB1, GNB2, GNB5, GSK3B, MAP2K1, MAP2K4, MAP2K5, MAPK1, MAPK14, MAPK3, MAPK8, MAPK9, MLST8, MTOR, PAX6, PIK3R1, PIK3R3, PRKACA, RAC1, RAP1B, RHOA, RPTOR, SRC, STAT3, STMN2
IL-12 Signaling and Production in Macrophages	1.58489e-12	0.279	38	AKT1, APOE, CD40, CEBPB, CHUK, EP300, FOS, IKBKB, IL23A, IRF1, JUN, MAF, MAP2K1, MAP2K4, MAP3K8, MAPK1, MAPK14, MAPK3, MAPK8, MAPK9, NCOA1, NFKB1, NFKB2, NFKBIA, PIK3R1, PIK3R3, PPARG, PRKCA, PRKCB, PRKCD, PRKCI, PRKCZ, REL, RELA, RXRA, STAT1, STAT6, TRAF6
TNFR1 Signaling	1.58489e-12	0.442	23	BIRC2, BIRC3, CASP3, CASP6, CASP7, CASP8, CDC42, CHUK, CYCS, FOS, IKBKB, JUN, MAP2K4, MAP3K14, MAPK8, NFKB1, NFKB2, NFKBIA, PAK2, REL, RELA, RIPK1, TRAF2
Xenobiotic Metabolism General Signaling Pathway	1.99526e-12	0.273	39	AHR, AKT1, ARNT, CREBBP, CUL3, EP300, GSTZ1, MAF, MAP2K1, MAP2K4, MAP2K5, MAP3K12, MAP3K14, MAP3K5, MAP3K8, MAPK1, MAPK14, MAPK3, MAPK8, MAPK9, NQO1, NR1H2, NR1H3, NR1H4, NR1I2, NR1I3, PIK3R1, PIK3R3, PPARA, PRKCA, PRKCB, PRKCD, PRKCI, PRKCZ, RAP1B, RBX1, RXRA, UGT1A1, UGT1A3
Huntington's Disease Signaling	1.99526e-12	0.206	58	AKT1, ATF4, BCL2L1, CASP1, CASP10, CASP3, CASP4, CASP6, CASP7, CASP8, CDK5, CLTC, CREB1, CREB3, CREBBP, CYCS, DCTN1, DLG4, EGFR, EP300, GNA14, GNB1, GNB2, GNB5, GRB2, HDAC1, HDAC3, HDAC5, HDAC6, JUN, MAP2K4, MAPK1, MAPK3, MAPK8, MAPK9, MTOR, NCOR1, NEUROD1, PDPK1, PIK3R1, PIK3R3, POLR2G, PRKCA, PRKCB, PRKCD, PRKCI, PRKCZ, PSMA5, PSMB1, PSMB9, SHC3, SP1, STX1B, TBP, TP53, UBC, UBD, ZDHHC17
Ovarian Cancer Signaling	2.51189e-12	0.259	41	ABL1, AKT1, BCL2, BRCA1, CCND1, CDK4, CDKN2A, CTNNB1, E2F1, E2F5, EGFR, FZD1, FZD5, GSK3B, HDAC1, HDAC3, HDAC5, HDAC6, HNF1A, LEF1, MAP2K1, MAPK1, MAPK3, MLH1, MSH6, MTOR, PIK3R1, PIK3R3, PRKACA, PTEN, RAP1B, RB1, RPS6KB1, RPS6KB2, SRC, SUV39H1, TCF3, TCF4, TCF7L2, TP53, WNT5A
PPAR Signaling	2.51189e-12	0.308	33	CHUK, CITED2, CREBBP, EP300, FOS, GRB2, IKBKB, JUN, MAP2K1, MAP3K14, MAPK1, MAPK3, NCOA1, NCOR1, NFKB1, NFKB2, NFKBIA, NR1H3, NR2F1, PDGFB, PPARA, PPARD, PPARG, PPARGC1A, RAP1B, REL, RELA, RXRA, SNW1, STAT5A, STAT5B, TRAF2, TRAF6
Colorectal Cancer Metastasis Signaling	3.98107e-12	0.208	56	AKT1, BAD, BCL2L1, CASP3, CCND1, CDC42, CDH1, CTNNB1, EGFR, FOS, FZD1, FZD5, GNA14, GNAI2, GNB1, GNB2, GNB5, GRB2, GSK3B, HNF1A, JAK1, JUN, LEF1, MAP2K1, MAP2K4, MAPK1, MAPK3, MAPK8, MAPK9, MLH1, MSH6, MYC, NFKB1, NFKB2, PIK3R1, PIK3R3, PRKACA, RAC1, RAP1B, REL, RELA, RHOA, RND1, SMAD2, SMAD3, SMAD4, SRC, STAT1, STAT3, TCF3, TCF4, TCF7L2, TGFBR1, TLR8, TP53, WNT5A
Apoptosis Signaling	6.30957e-12	0.308	32	BAD, BCL2, BCL2L1, BIRC2, BIRC3, CASP10, CASP3, CASP6, CASP7, CASP8, CDK1, CHUK, CYCS, IKBKB, LMNA, MAP2K1, MAP2K4, MAP3K14, MAP3K5, MAPK1, MAPK3, MAPK8, MCL1, NFKB1, NFKB2, NFKBIA, PRKCA, RAP1B, REL, RELA, RPS6KA1, TP53
p38 MAPK Signaling	1e-11	0.288	34	ATF4, CREB1, CREB3, CREBBP, DDIT3, EEF2K, ELK1, H3-3A/H3-3B, H3-4, H3C14, HMGN1, HSPB1, MAP2K4, MAP3K5, MAPK14, MAPT, MAX, MEF2A, MEF2C, MEF2D, MYC, PLA2G12B, PLA2G5, RPS6KA1, RPS6KA5, RPS6KB1, RPS6KB2, SRF, STAT1, TGFBR1, TIFA, TP53, TRAF2, TRAF6
April Mediated Signaling	1e-11	0.476	20	CHUK, ELK1, FOS, IKBKB, JUN, MAP2K4, MAP3K14, MAPK1, MAPK14, MAPK8, MAPK9, NFATC1, NFATC2, NFKB1, NFKB2, NFKBIA, REL, RELA, TRAF2, TRAF6
IL-17A Signaling in Fibroblasts	1.25893e-11	0.5	19	CCL2, CCL7, CEBPB, CEBPD, CHUK, FOS, GSK3B, IKBKB, JUN, LCN2, MAPK1, MAPK14, MAPK3, NFKB1, NFKB2, NFKBIA, REL, RELA, TRAF6
4-1BB Signaling in T Lymphocytes	1.25893e-11	0.529	18	CHUK, IKBKB, JUN, MAP2K1, MAP2K4, MAP3K14, MAP3K5, MAPK1, MAPK14, MAPK3, MAPK8, MAPK9, NFKB1, NFKB2, NFKBIA, REL, RELA, TRAF2
CD27 Signaling in Lymphocytes	1.58489e-11	0.404	23	BCL2L1, CASP3, CASP8, CHUK, CYCS, FOS, IKBKB, JUN, MAP2K1, MAP2K4, MAP2K5, MAP3K12, MAP3K14, MAP3K5, MAP3K8, MAPK8, MAPK9, NFKB1, NFKB2, NFKBIA, REL, RELA, TRAF2
GNRH Signaling	1.58489e-11	0.234	44	ATF4, CACNA1A, CALM1 (includes others), CDC42, CREB1, CREB3, CREBBP, EGFR, EGR1, ELK1, FOS, GNA14, GNAI2, GNB1, GNB2, GNB5, GRB2, HBEGF, JUN, MAP2K1, MAP2K4, MAP3K12, MAP3K14, MAP3K5, MAP3K8, MAPK1, MAPK14, MAPK3, MAPK8, MAPK9, NFKB1, NFKB2, PAK2, PRKACA, PRKCA, PRKCB, PRKCD, PRKCI, PRKCZ, RAC1, RAP1B, REL, RELA, SRC
B Cell Activating Factor Signaling	1.58489e-11	0.465	20	CHUK, ELK1, FOS, IKBKB, JUN, MAP2K4, MAP3K14, MAPK1, MAPK14, MAPK8, MAPK9, NFATC1, NFATC2, NFKB1, NFKB2, NFKBIA, REL, RELA, TRAF2, TRAF6
Thyroid Cancer Signaling	1.99526e-11	0.342	27	AKT1, CCND1, CDH1, CTNNB1, CXCL8, ELK1, FOS, FOXO1, GSK3B, HNF1A, IRS1, IRS2, JUN, LEF1, MAP2K1, MAPK1, MAPK3, MTOR, MYC, PIK3R1, PIK3R3, PTEN, RAP1B, TCF3, TCF4, TCF7L2, TP53
IL-6 Signaling	2.51189e-11	0.273	35	A2M, AKT1, CEBPB, CHUK, CSNK2A1, CSNK2B, CXCL8, ELK1, FOS, GRB2, HSPB1, IKBKB, JUN, LBP, MAP2K1, MAP2K4, MAP3K14, MAPK1, MAPK14, MAPK3, MAPK8, MAPK9, MCL1, NFKB1, NFKB2, NFKBIA, PIK3R1, PIK3R3, RAP1B, REL, RELA, SRF, STAT3, TRAF2, TRAF6
Androgen Signaling	2.51189e-11	0.243	41	AR, CACNA1A, CALM1 (includes others), CCND1, CREBBP, EP300, GNA14, GNAI2, GNB1, GNB2, GNB5, GTF2A1, GTF2B, GTF2F2, H3-3A/H3-3B, H3-4, H3C14, JUN, KAT2B, MAPK1, MAPK3, NCOA1, NCOA2, NFKB1, NFKB2, POLR2G, PRKACA, PRKCA, PRKCB, PRKCD, PRKCI, PRKCZ, REL, RELA, SHBG, SMAD3, SRC, SRY, TAF5L, TBP, TGFB1I1
FLT3 Signaling in Hematopoietic Progenitor Cells	3.16228e-11	0.338	27	AKT1, ATF4, BAD, CREB1, CREB3, CREBBP, EIF4EBP1, ELK1, GRB2, MAP2K1, MAPK1, MAPK14, MAPK3, MTOR, PDPK1, PIK3R1, PIK3R3, RAP1B, RPS6KA1, RPS6KA5, RPS6KB1, STAT1, STAT2, STAT3, STAT5A, STAT5B, STAT6
Systemic Lupus Erythematosus In B Cell Signaling Pathway	3.98107e-11	0.199	55	AKT1, BAD, BCL2, BCL2L1, CALM1 (includes others), CCND1, CCND2, CD40, CD79A, CTNNB1, CXCL8, FOS, FOXO1, FOXO3, GRB2, GSK3B, IFIT3, IRF3, IRF5, IRF7, JAK1, JUN, MAP2K1, MAP3K14, MAPK1, MAPK3, MCL1, MTOR, MYC, NFATC1, NFATC2, NFKB1, NFKB2, PDPK1, PIK3R1, PIK3R3, PRKCA, PRKCB, PRKCD, PRKCI, PRKCZ, RAC1, RAP1B, REL, RELA, SHC3, SRC, STAT1, STAT2, STAT3, SYK, TLR8, TRAF2, TRAF6, YES1
Endometrial Cancer Signaling	5.01187e-11	0.383	23	AKT1, BAD, CCND1, CDH1, CTNNA1, CTNNB1, ELK1, ERBB2, FOXO3, GRB2, GSK3B, LEF1, MAP2K1, MAPK1, MAPK3, MLH1, MYC, PDPK1, PIK3R1, PIK3R3, PTEN, RAP1B, TP53
IL-15 Signaling	6.30957e-11	0.338	26	AKT1, BCL2L1, CXCL8, JAK1, MAP2K1, MAPK1, MAPK14, MAPK3, MLST8, MTOR, MYC, NFKB1, NFKB2, PIK3R1, PIK3R3, RAP1B, REL, RELA, RPS6KB1, RPS6KB2, RPTOR, STAT3, STAT5A, STAT5B, STAT6, SYK
Role of Oct4 in Mammalian Embryonic Stem Cell Pluripotency	7.94328e-11	0.435	20	ASH2L, BRCA1, CASP6, CDX2, ETS2, FOXA2, HOXB1, MEF2A, NR2F1, NR2F2, NR2F6, NR5A1, NR5A2, NR6A1, PPP1R8, RARA, RB1, RXRB, SPP1, TP53
CD40 Signaling	1e-10	0.358	24	CD40, CHUK, FOS, IKBKB, JUN, MAP2K1, MAP2K4, MAP2K5, MAP3K14, MAPK1, MAPK14, MAPK3, MAPK8, MAPK9, NFKB1, NFKB2, NFKBIA, PIK3R1, PIK3R3, REL, RELA, STAT3, TRAF2, TRAF6
Adrenomedullin signaling pathway	1.09648e-10	0.221	44	AKT1, ARAF, ARNT, BAD, BCL2, CALM1 (includes others), CASP3, CEBPB, CFH, ELK1, FOS, GNA14, GRB2, GSK3B, GUCY1A1, GUCY1B1, HIF1A, KCNN2, KCNQ2, KCNQ3, MAP2K1, MAP2K4, MAP2K5, MAPK1, MAPK14, MAPK3, MAPK8, MAPK9, MAX, NFKB1, NFKB2, NOS3, PIK3R1, PIK3R3, PPARG, PRKACA, RAP1B, REL, RELA, RXRA, RXRB, SHC3, TFAP2A, TFAP2D
Role of Osteoblasts, Osteoclasts and Chondrocytes in Rheumatoid Arthritis	1.58489e-10	0.21	47	AKT1, BAD, BCL2, BIRC2, BIRC3, BMPR2, CALM1 (includes others), CHUK, CSNK1A1, CTNNB1, DKK1, FOS, FOXO1, FZD1, FZD5, GSK3B, HNF1A, IKBKB, JUN, LEF1, MAP2K4, MAP3K14, MAP3K5, MAPK1, MAPK14, MAPK3, MAPK8, MAPK9, NFATC1, NFATC2, NFKB1, NFKBIA, PIK3R1, PIK3R3, RELA, RUNX2, SMAD1, SMAD4, SMAD5, SPP1, SRC, TCF3, TCF4, TCF7L2, TRAF2, TRAF6, WNT5A
Prolactin Signaling	1.8197e-10	0.314	27	CEBPB, CREBBP, EP300, FOS, GRB2, IRF1, IRS1, JUN, MAP2K1, MAPK1, MAPK3, MYC, NR3C1, PDPK1, PIK3R1, PIK3R3, PRKCA, PRKCB, PRKCD, PRKCI, PRKCZ, RAP1B, SP1, STAT1, STAT3, STAT5A, STAT5B
Xenobiotic Metabolism Signaling	1.86209e-10	0.19	55	AHR, ARNT, CES2, CITED2, CREBBP, CUL3, CYP2C8, EP300, GRIP1, GSTZ1, HDAC5, MAF, MAP2K1, MAP2K4, MAP2K5, MAP3K12, MAP3K14, MAP3K5, MAP3K8, MAPK1, MAPK14, MAPK3, MAPK8, MAPK9, MGMT, NCOA1, NFKB1, NFKB2, NQO1, NR1I2, NR1I3, PIK3R1, PIK3R3, PPARGC1A, PPP2R5C, PPP2R5E, PRKCA, PRKCB, PRKCD, PRKCI, PRKCZ, PTPA, RAP1B, RBX1, REL, RELA, RXRA, SNW1, SULT1A2, SULT1A3/SULT1A4, SULT1C4, SULT2A1, SUMO1, UGT1A1…
Regulation Of The Epithelial Mesenchymal Transition In Development Pathway	2.45471e-10	0.31	27	APH1A, APH1B, BRCA1, CDH1, CTNNB1, FZD1, FZD5, GLIS2, GSK3B, HIF1A, HNF1A, LEF1, MAML1, NCSTN, NFKB1, NFKB2, NOTCH1, PSEN1, PSENEN, REL, RELA, SNAI1, TCF3, TCF4, TCF7L2, TWIST1, WNT5A
Gα12/13 Signaling	3.16228e-10	0.256	34	AKT1, CDC42, CDH1, CDH16, CDH5, CHUK, CTNNB1, ELK1, F2RL1, F2RL2, IKBKB, JUN, LPAR6, MAP2K1, MAP2K4, MAP3K5, MAPK1, MAPK3, MAPK8, MAPK9, MEF2A, MEF2C, MEF2D, MYL9, NFKB1, NFKB2, NFKBIA, PIK3R1, PIK3R3, RAP1B, REL, RELA, RHOA, SRC
JAK/Stat Signaling	3.16228e-10	0.317	26	AKT1, BCL2L1, CEBPB, FOS, GRB2, JAK1, JUN, MAP2K1, MAPK1, MAPK3, MTOR, NFKB1, NFKB2, PIAS1, PIAS3, PIK3R1, PIK3R3, RAP1B, REL, RELA, STAT1, STAT2, STAT3, STAT5A, STAT5B, STAT6
GADD45 Signaling	3.63078e-10	0.65	13	ATM, ATR, BRCA1, CCNB1, CCND1, CCND2, CCNE1, CDK1, CDK2, CDK4, GADD45G, PCNA, TP53
Growth Hormone Signaling	3.71535e-10	0.338	24	A2M, CEBPA, ELK1, FOS, IRS1, MAPK1, MAPK3, PDPK1, PIK3R1, PIK3R3, PRKCA, PRKCB, PRKCD, PRKCI, PRKCZ, RPS6KA1, RPS6KA5, RPS6KB1, RPS6KB2, SRF, STAT1, STAT3, STAT5A, STAT5B
Lymphotoxin β Receptor Signaling	4.0738e-10	0.382	21	AKT1, BCL2L1, BIRC2, CASP3, CHUK, CREBBP, CYCS, EP300, IKBKB, MAP3K14, MAPK1, MAPK3, NFKB1, NFKB2, NFKBIA, PDPK1, PIK3R1, PIK3R3, RELA, TRAF2, TRAF6
Germ Cell-Sertoli Cell Junction Signaling	5.12861e-10	0.228	39	A2M, ACTA2, ACTB, ACTN1, AKT1, CDC42, CDH1, CFL1, CTNNA1, CTNNB1, CTNND1, FER, JUP, LIMK2, MAP2K1, MAP2K4, MAP3K12, MAP3K14, MAP3K5, MAP3K8, MAPK1, MAPK14, MAPK3, MAPK8, MAPK9, PAK2, PDPK1, PIK3R1, PIK3R3, RAC1, RAP1B, RHOA, RND1, SRC, TGFBR1, TUBA1B, TUBB, TUBB3, TUBB4B
Role of PKR in Interferon Induction and Antiviral Response	5.7544e-10	0.25	34	CASP1, CASP3, CASP8, CHUK, CYCS, E2F1, FOS, HMGB1, IKBKB, IRF1, IRF3, JAK1, JUN, MAP2K4, MAPK1, MAPK14, MAPK3, MAPK8, MAPK9, MARCO, NFKB1, NFKB2, NFKBIA, NPM1, PDGFB, REL, RELA, SP1, STAT1, STAT2, STAT3, TARBP2, TP53, TRAF6
PI3K Signaling in B Lymphocytes	5.7544e-10	0.245	35	ABL1, AKT1, ATF4, ATF5, CALM1 (includes others), CD40, CD79A, CHUK, CREB1, ELK1, FOS, FOXO3, IKBKB, IRS1, IRS2, JUN, MAP2K1, MAPK1, MAPK3, NFATC1, NFATC2, NFKB1, NFKB2, NFKBIA, PDPK1, PIK3R1, PRKCB, PRKCI, PRKCZ, PTEN, RAC1, RAP1B, REL, RELA, SYK
Thrombin Signaling	6.16595e-10	0.21	44	AKT1, ARHGEF11, ARHGEF12, CDC42, CREB1, EGFR, ELK1, F2RL2, GATA2, GATA4, GATA5, GATA6, GNA14, GNAI2, GNB1, GNB2, GNB5, GRB2, IKBKB, MAP2K1, MAPK1, MAPK14, MAPK3, MYL9, NFKB1, NFKB2, PDPK1, PIK3R1, PIK3R3, PPP1CB, PRKCA, PRKCB, PRKCD, PRKCI, PRKCZ, RAC1, RAP1B, REL, RELA, RHOA, RND1, RPS6KB1, SRC, TBP
UVC-Induced MAPK Signaling	6.16595e-10	0.392	20	ARAF, ATR, EGFR, FOS, JUN, MAP2K1, MAP2K4, MAPK1, MAPK14, MAPK3, MAPK8, MAPK9, PRKCA, PRKCB, PRKCD, PRKCI, PRKCZ, RAP1B, SRC, TP53
Factors Promoting Cardiogenesis in Vertebrates	6.76083e-10	0.238	36	ACVR2B, ATF4, BMPR2, CCND1, CREB1, CREB3, CREBBP, CTNNB1, DKK1, FZD1, FZD5, GATA4, GSK3B, HNF1A, LEF1, MAP2K4, MAPK14, MAPK8, MAPK9, MEF2C, MYC, PRKCA, PRKCB, PRKCD, PRKCI, PRKCZ, RHOA, SMAD1, SMAD2, SMAD4, SMAD5, TCF3, TCF4, TCF7L2, TGFBR1, WNT5A
IL-3 Signaling	6.91831e-10	0.316	25	AKT1, BAD, ELK1, FOS, FOXO1, GRB2, JAK1, JUN, MAP2K1, MAPK1, MAPK3, PIK3R1, PIK3R3, PRKCA, PRKCB, PRKCD, PRKCI, PRKCZ, RAC1, RAP1B, STAT1, STAT3, STAT5A, STAT5B, STAT6
Estrogen-Dependent Breast Cancer Signaling	6.91831e-10	0.316	25	AKT1, ATF4, CCND1, CREB1, CREB3, CREBBP, EGFR, ELK1, ESR1, FOS, HSD17B4, JUN, MAPK1, MAPK3, NFKB1, NFKB2, PIK3R1, PIK3R3, RAP1B, REL, RELA, SP1, SRC, STAT5A, STAT5B
TWEAK Signaling	7.24436e-10	0.459	17	BIRC2, BIRC3, CASP3, CASP6, CASP7, CASP8, CHUK, CYCS, IKBKB, MAP3K14, NFKB1, NFKB2, NFKBIA, REL, RELA, RIPK1, TRAF2
iNOS Signaling	9.12011e-10	0.404	19	CALM1 (includes others), CHUK, CREBBP, FOS, HMGA1, IKBKB, IRF1, JAK1, JUN, LBP, MAPK1, MAPK14, NFKB1, NFKB2, NFKBIA, REL, RELA, STAT1, TRAF6
PDGF Signaling	9.12011e-10	0.302	26	ABL1, CRK, CSNK2A1, CSNK2B, ELK1, FOS, GRB2, JAK1, JUN, MAP2K1, MAP2K4, MAPK1, MAPK3, MAPK8, MYC, PDGFB, PIK3R1, PIK3R3, PRKCA, PRKCB, RAP1B, SPHK1, SRC, SRF, STAT1, STAT3
Reelin Signaling in Neurons	1.1749e-09	0.254	32	AKT1, APOE, APP, ARHGEF11, ARHGEF12, ARPC3, CDC42, CDK5, CFL1, CRK, DAB1, DNAH1, GSK3B, MAP2K1, MAP2K4, MAP2K5, MAPK1, MAPK3, MAPK8, MAPK8IP2, MAPK9, MAPT, MTOR, PAFAH1B3, PDK2, PIK3R1, PIK3R3, RAC1, RAP1B, RHOA, SRC, YES1
Cardiac Hypertrophy Signaling (Enhanced)	1.1749e-09	0.151	81	ACVR2B, ADRB2, AKT1, APEX1, ATP2A3, BMPR2, CACNA1A, CALM1 (includes others), CHUK, CTF1, CTNNB1, CXCL8, EIF4EBP1, ELK1, EP300, FGF11, FGF13, FGFR1, FGFR4, FZD1, FZD5, GATA4, GNA14, GNAI2, GNB1, GNB2, GNB5, GSK3B, HAND2, HDAC1, HDAC3, HDAC5, HDAC6, HSPB1, IKBKB, IL7R, JUN, MAP2K1, MAP2K4, MAP2K5, MAP3K12, MAP3K14, MAP3K5, MAP3K8, MAPK1, MAPK14, MAPK3, MAPK8, MAPK9, MEF2A, MEF2C, MEF2D, MTOR, MYC, …
Insulin Receptor Signaling	1.20226e-09	0.243	34	AKT1, BAD, CRK, EIF4EBP1, FOXO1, FOXO3, GRB2, GSK3B, IRS1, IRS2, JAK1, MAP2K1, MAPK1, MAPK3, MAPK8, MTOR, PDPK1, PIK3R1, PIK3R3, PPP1CA, PPP1CB, PPP1CC, PPP1R3A, PPP1R7, PRKACA, PRKCI, PRKCZ, PTEN, RAP1B, RPS6KB1, RPS6KB2, RPTOR, TSC1, TSC2
Renin-Angiotensin Signaling	1.38038e-09	0.258	31	CCL2, CCL5, ELK1, FOS, GRB2, JUN, MAP2K1, MAP2K4, MAPK1, MAPK14, MAPK3, MAPK8, MAPK9, NFKB1, NFKB2, PAK2, PIK3R1, PIK3R3, PRKACA, PRKCA, PRKCB, PRKCD, PRKCI, PRKCZ, RAC1, RAP1B, REL, RELA, SHC3, STAT1, STAT3
Fcγ Receptor-mediated Phagocytosis in Macrophages and Monocytes	1.44544e-09	0.287	27	ACTA2, ACTB, AKT1, ARF6, ARPC3, CDC42, CRK, EZR, MAPK1, MAPK3, NCK2, PIK3R1, PIK3R3, PLD2, PRKCA, PRKCB, PRKCD, PRKCI, PRKCZ, PTEN, RAB11A, RAC1, RPS6KB1, RPS6KB2, SRC, SYK, YES1
Telomerase Signaling	1.47911e-09	0.271	29	ABL1, AKT1, E2F1, EGFR, ELF3, ETS1, ETS2, GRB2, HDAC1, HDAC3, HDAC5, HDAC6, MAP2K1, MAPK1, MAPK3, MYC, PDPK1, PIK3R1, PIK3R3, POT1, PPP2R5C, PPP2R5E, PTPA, RAP1B, RB1, SP1, TERF1, TERF2, TP53
Induction of Apoptosis by HIV1	1.86209e-09	0.338	22	BCL2, BCL2L1, BIRC2, BIRC3, CASP3, CASP8, CHUK, CYCS, IKBKB, MAP2K4, MAP3K14, MAP3K5, MAPK8, MAPK9, NFKB1, NFKB2, NFKBIA, REL, RELA, RIPK1, TP53, TRAF2
Estrogen-mediated S-phase Entry	1.90546e-09	0.538	14	CCND1, CCNE1, CDC25A, CDK1, CDK2, CDK4, CDKN1B, E2F1, E2F5, ESR1, ESR2, MYC, RB1, SKP2
Death Receptor Signaling	2.34423e-09	0.281	27	ACTA2, ACTB, BCL2, BIRC2, BIRC3, CASP10, CASP3, CASP6, CASP7, CASP8, CHUK, CYCS, HSPB1, IKBKB, LMNA, MAP2K4, MAP3K14, MAP3K5, MAPK8, NFKB1, NFKB2, NFKBIA, REL, RELA, RIPK1, TNFRSF10B, TRAF2
Role of Tissue Factor in Cancer	2.45471e-09	0.259	30	AKT1, BCL2L1, CASP3, CDC42, CFL1, CXCL8, EGFR, EGR1, F2RL1, GNA14, HBEGF, LIMK2, MAPK1, MAPK14, MAPK3, MTOR, PIK3R1, PIK3R3, PRKCA, PTEN, RAC1, RAP1B, RPS6KA1, RPS6KA5, RPS6KB1, SRC, STAT5A, STAT5B, TP53, YES1
mTOR Signaling	2.5704e-09	0.203	43	AKT1, ARHGAP8/PRR5-ARHGAP8, CDC42, EIF4A3, EIF4EBP1, EIF4EBP2, HIF1A, IRS1, MAPK1, MAPK3, MLST8, MTOR, PDPK1, PIK3R1, PIK3R3, PLD2, PPP2R5C, PPP2R5E, PRKAA1, PRKAA2, PRKAB2, PRKCA, PRKCB, PRKCD, PRKCI, PRKCZ, PRR5, PTPA, RAC1, RAP1B, RHEB, RHOA, RND1, RPS15, RPS24, RPS4Y1, RPS6KA1, RPS6KA5, RPS6KB1, RPS6KB2, RPTOR, TSC1, TSC2
Type II Diabetes Mellitus Signaling	2.88403e-09	0.23	35	ACSBG2, ADIPOQ, AKT1, CACNA1A, CEBPB, CHUK, IKBKB, IRS1, IRS2, MAP2K4, MAP3K14, MAP3K5, MAPK1, MAPK3, MAPK8, MAPK9, MTOR, NFKB1, NFKB2, NFKBIA, PDPK1, PIK3R1, PIK3R3, PPARG, PRKAA1, PRKAA2, PRKAB2, PRKCA, PRKCB, PRKCD, PRKCI, PRKCZ, REL, RELA, TRAF2
Myc Mediated Apoptosis Signaling	2.88403e-09	0.38	19	ADRB2, BCL2, BCL2L1, CASP3, CASP8, CDKN2A, CHUK, CREBBP, CYCS, IKBKB, MAX, MCL1, MDM2, MYC, NFKB1, NFKB2, PRKACA, TP53, TRAF2
Synaptogenesis Signaling Pathway	2.88403e-09	0.176	55	AKT1, AP2B1, APOE, ARPC3, ATF4, BAD, CALM1 (includes others), CDC42, CDH1, CDH16, CDH5, CDK5, CFL1, CREB1, CREB3, CREBBP, CRK, CTNNB1, CTNND1, DAB1, DLG4, EFNB2, EIF4EBP1, EIF4EBP2, EPHB3, EPHB6, GRB2, GSK3B, ITSN1, ITSN2, MAPK1, MAPK14, MAPK3, MAPT, MTOR, NAP1L1, NAP1L4, NLGN3, PIK3R1, PIK3R3, PRKACA, PRKCD, RAB3A, RAC1, RAP1B, RHOA, RPS6KB1, RPS6KB2, SGTA, SHC3, SRC, STX1B, SYT17, THBS1, YES1
Role of IL-17F in Allergic Inflammatory Airway Diseases	2.95121e-09	0.4	18	ATF4, CCL2, CCL4, CCL7, CREB1, CREB3, CREBBP, CXCL8, MAP2K1, MAPK1, MAPK3, NFKB1, NFKB2, REL, RELA, RPS6KA1, RPS6KA5, TRAF6
IL-17A Signaling in Airway Cells	3.38844e-09	0.328	22	AKT1, CHUK, GSK3B, IKBKB, JAK1, MAP2K1, MAP2K4, MAPK1, MAPK14, MAPK3, MAPK8, MAPK9, NFKB1, NFKB2, NFKBIA, PIK3R1, PIK3R3, PTEN, REL, RELA, STAT3, TRAF6
HGF Signaling	3.71535e-09	0.242	32	AKT1, CCND1, CDC42, CDK2, CDKN2A, ELF3, ELK1, ETS1, ETS2, FOS, GRB2, JUN, MAP2K1, MAP2K4, MAP3K12, MAP3K14, MAP3K5, MAP3K8, MAPK1, MAPK3, MAPK8, MAPK9, PIK3R1, PIK3R3, PRKCA, PRKCB, PRKCD, PRKCI, PRKCZ, RAC1, RAP1B, STAT3
Role of BRCA1 in DNA Damage Response	4.67735e-09	0.3	24	ACTB, ARID1A, ATM, ATR, BARD1, BRCA1, CHEK1, E2F1, E2F5, FAAP100, MDC1, MLH1, MRE11, MSH6, NBN, PBRM1, PLK1, RAD50, RB1, SMARCB1, SMARCC1, SMARCE1, STAT1, TP53
Renal Cell Carcinoma Signaling	4.67735e-09	0.3	24	AKT1, ARNT, CDC42, CREBBP, CRK, CUL2, EP300, ETS1, FOS, GRB2, HIF1A, JUN, MAP2K1, MAPK1, MAPK3, PAK2, PDGFB, PIK3R1, PIK3R3, RAC1, RAP1B, RBX1, UBC, UBD
Cardiac Hypertrophy Signaling	5.24807e-09	0.186	48	ADRB2, AKT1, CACNA1A, CALM1 (includes others), CDC42, CREB1, CREBBP, ELK1, EP300, GATA4, GNA14, GNAI2, GNB1, GNB2, GNB5, GRB2, GSK3B, HAND2, HSPB1, IRS1, JUN, MAP2K1, MAP2K4, MAP3K12, MAP3K14, MAP3K5, MAP3K8, MAPK1, MAPK14, MAPK3, MAPK8, MAPK9, MEF2A, MEF2C, MEF2D, MTOR, MYL9, PIK3R1, PIK3R3, PRKACA, RAC1, RAP1B, RHOA, RND1, RPS6KA1, RPS6KB1, SRF, TGFBR1
TNFR2 Signaling	5.24807e-09	0.469	15	BIRC2, BIRC3, CHUK, FOS, IKBKB, JUN, MAP2K4, MAP3K14, MAPK8, NFKB1, NFKB2, NFKBIA, REL, RELA, TRAF2
Thrombopoietin Signaling	5.7544e-09	0.333	21	FOS, GRB2, IRS2, JUN, MAP2K1, MAPK1, MAPK3, MYC, PIK3R1, PIK3R3, PRKCA, PRKCB, PRKCD, PRKCI, PRKCZ, RAP1B, STAT1, STAT3, STAT5A, STAT5B, THPO
HIF1α Signaling	1.41254e-08	0.197	41	AKT1, APEX1, ARAF, ARNT, COPS5, CREBBP, CUL2, EIF4EBP1, EP300, EPO, FOXP3, HIF1A, JUN, KDM1A, MAP2K1, MAP2K4, MAP2K5, MAPK1, MAPK3, MDM2, MTOR, NCOA1, PDGFB, PIK3R1, PIK3R3, PRKCA, PRKCB, PRKCD, PRKCI, PRKCZ, RAC1, RACK1, RAN, RAP1B, RBX1, RPS6KB1, RPS6KB2, SAT1, STAT3, TP53, VIM
NF-κB Activation by Viruses	1.41254e-08	0.295	23	AKT1, CHUK, CXCR5, IKBKB, MAP3K14, MAPK1, MAPK3, NFKB1, NFKB2, NFKBIA, PIK3R1, PIK3R3, PRKCA, PRKCB, PRKCD, PRKCI, PRKCZ, RAP1B, REL, RELA, RIPK1, TBP, TRAF2
Toll-like Receptor Signaling	1.41254e-08	0.295	23	CHUK, ECSIT, ELK1, FOS, IKBKB, JUN, LBP, MAP2K4, MAP3K14, MAPK1, MAPK14, MAPK8, NFKB1, NFKB2, NFKBIA, PPARA, REL, RELA, TICAM2, TLR8, TRAF6, UBC, UBD
Mouse Embryonic Stem Cell Pluripotency	1.44544e-08	0.26	27	AKT1, BMPR2, CREBBP, CTNNB1, FZD1, FZD5, GRB2, GSK3B, HNF1A, JAK1, LEF1, MAP2K1, MAPK1, MAPK14, MAPK3, MYC, PIK3R1, PIK3R3, RAP1B, SMAD1, SMAD4, SMAD5, STAT3, TCF3, TCF4, TCF7L2, TP53
Pyridoxal 5'-phosphate Salvage Pathway	1.44544e-08	0.318	21	ARAF, CDK1, CDK2, CDK4, CDK5, CDK6, CSNK1A1, LIMK2, MAP2K1, MAP2K4, MAP3K8, MAPK1, MAPK3, MAPK8, MAPK9, PAK2, PLK1, PRKAA1, PRKAA2, PRKCD, TTK
Melanoma Signaling	1.99526e-08	0.36	18	AKT1, BAD, CCND1, CDH1, CDK4, CDKN2A, E2F1, MAP2K1, MAPK1, MAPK3, MDM2, MITF, PIK3R1, PIK3R3, PTEN, RAP1B, RB1, TP53
IL-17A Signaling in Gastric Cells	2.29087e-08	0.5	13	CCL5, CXCL8, EGFR, FOS, JUN, MAP2K4, MAPK1, MAPK14, MAPK3, MAPK8, MAPK9, NFKB1, RELA
Chemokine Signaling	2.34423e-08	0.287	23	CALM1 (includes others), CCL13, CCL2, CCL4, CCL5, CCL7, CFL1, CXCL12, FOS, GNAI2, JUN, LIMK2, MAP2K1, MAPK1, MAPK14, MAPK3, MAPK8, PPP1CB, PRKCA, PRKCB, RAP1B, RHOA, SRC
Hypoxia Signaling in the Cardiovascular System	2.51189e-08	0.297	22	AKT1, ARNT, ATF4, ATM, COPS5, CREB1, CREB3, CREBBP, EP300, EPO, HIF1A, JUN, MDM2, NFKBIA, NOS3, NQO1, PTEN, SUMO1, TP53, UBE2D1, UBE2I, UBE2T
BMP signaling pathway	2.69153e-08	0.276	24	BMPR2, CREB1, CREBBP, GRB2, JUN, MAGED1, MAP2K1, MAP2K4, MAPK1, MAPK14, MAPK3, MAPK8, MAPK9, NFKB1, NFKB2, PRKACA, RAP1B, REL, RELA, RUNX2, SMAD1, SMAD4, SMAD5, SMAD7
Amyloid Processing	2.81838e-08	0.353	18	AKT1, APH1A, APH1B, APP, BACE1, CDK5, CSNK1A1, CSNK2A1, CSNK2B, GSK3B, MAPK1, MAPK14, MAPK3, MAPT, NCSTN, PRKACA, PSEN1, PSENEN
Role of CHK Proteins in Cell Cycle Checkpoint Control	3.16228e-08	0.333	19	ATM, ATR, BRCA1, CDC25A, CDK1, CDK2, CHEK1, E2F1, E2F5, MDC1, MRE11, NBN, PCNA, PLK1, PPP2R5C, PPP2R5E, PTPA, RAD50, TP53
Role of IL-17A in Arthritis	3.16228e-08	0.333	19	CCL2, CCL5, CCL7, CXCL8, MAP2K1, MAP2K4, MAPK1, MAPK14, MAPK3, MAPK8, MAPK9, NFKB1, NFKB2, NFKBIA, PIK3R1, PIK3R3, REL, RELA, RPS6KA1
IL-15 Production	3.89045e-08	0.236	29	ABL1, CLK1, DDR2, DYRK4, EGFR, EPHB3, ERBB2, ERBB3, FER, FGFR1, FGFR4, IRF1, IRF3, JAK1, MAP2K1, MAP2K4, MAP2K5, NFKB1, NFKB2, PRKCI, PRKCZ, REL, RELA, ROR2, SRC, STAT1, SYK, TXK, YES1
Bladder Cancer Signaling	3.98107e-08	0.241	28	ABL1, CCND1, CDH1, CDK4, CDKN2A, CXCL8, E2F1, E2F5, EGFR, ERBB2, FGF11, FGF13, HDAC1, HDAC3, HDAC5, HDAC6, MAP2K1, MAPK1, MAPK3, MDM2, MYC, RAP1B, RASSF1, RB1, RPS6KA5, SUV39H1, THBS1, TP53
Neurotrophin/TRK Signaling	4.16869e-08	0.289	22	AKT1, ATF4, CDC42, CREB1, CREB3, CREBBP, FOS, GRB2, JUN, MAP2K1, MAP2K4, MAP2K5, MAP3K5, MAPK1, MAPK3, MAPK8, PDPK1, PIK3R1, PIK3R3, RAP1B, RPS6KA1, SPRY2
Signaling by Rho Family GTPases	4.7863e-08	0.175	47	ACTA2, ACTB, ARHGEF11, ARHGEF12, ARPC3, CDC42, CDH1, CDH16, CDH5, CFL1, ELK1, EZR, FOS, GFAP, GNA14, GNAI2, GNB1, GNB2, GNB5, JUN, LIMK2, MAP2K1, MAP2K4, MAP3K12, MAPK1, MAPK3, MAPK8, MAPK9, MSN, MYL9, NEDD4, NFKB1, NFKB2, PAK2, PARD3, PIK3R1, PIK3R3, PRKCI, PRKCZ, RAC1, RDX, REL, RELA, RHOA, RND1, SEPTIN1, VIM
Activation of IRF by Cytosolic Pattern Recognition Receptors	5.88844e-08	0.308	20	CD40, CHUK, CREBBP, IKBKB, IRF3, IRF7, JUN, MAP2K4, MAPK8, MAPK9, NFKB1, NFKB2, NFKBIA, PIN1, REL, RELA, RIPK1, STAT1, STAT2, TRAF6
TR/RXR Activation	6.0256e-08	0.274	23	AKT1, BCL3, EP300, GPS2, HDAC3, HIF1A, MDM2, MTOR, NCOA1, NCOA2, NCOA3, NCOA6, NCOR1, PIK3R1, PIK3R3, PPARGC1A, RXRA, RXRB, SLC16A2, SREBF1, SREBF2, THRA, THRB
FGF Signaling	6.0256e-08	0.274	23	AKT1, ATF4, CREB1, CREB3, CREBBP, CRK, FGF11, FGF13, FGFR1, FGFR4, GRB2, MAP2K1, MAP3K5, MAPK1, MAPK14, MAPK3, MAPK8, PIK3R1, PIK3R3, PRKCA, RAC1, RPS6KA5, STAT3
Cholecystokinin/Gastrin-mediated Signaling	6.91831e-08	0.235	28	CDC42, EGFR, ELK1, FOS, GRB2, JUN, MAP2K1, MAP2K4, MAP2K5, MAPK1, MAPK14, MAPK3, MAPK8, MAPK9, MEF2A, MEF2C, MEF2D, PRKCA, PRKCB, PRKCD, PRKCI, PRKCZ, RAC1, RAP1B, RHOA, RND1, SRC, SRF
IL-10 Signaling	7.24436e-08	0.292	21	CCR1, CHUK, ELK1, FOS, IKBKB, JAK1, JUN, LBP, MAP2K4, MAP3K14, MAPK1, MAPK14, MAPK8, NFKB1, NFKB2, NFKBIA, REL, RELA, SP1, STAT3, TRAF6
Ephrin B Signaling	7.24436e-08	0.292	21	ABI1, CDC42, CFL1, CTNNB1, CXCL12, EFNB2, EPHB3, EPHB6, GNA14, GNAI2, GNB1, GNB2, GNB5, HNRNPK, ITSN1, ITSN2, MAPK1, MAPK3, NCK2, RAC1, RHOA
IL-22 Signaling	8.12831e-08	0.5	12	AKT1, JAK1, MAP2K4, MAPK1, MAPK14, MAPK3, MAPK8, MAPK9, STAT1, STAT3, STAT5A, STAT5B
Hepatic Cholestasis	8.31764e-08	0.196	37	CHUK, CXCL8, CYP27A1, ESR1, FGFR4, HNF1A, HNF4A, IKBKB, JUN, LBP, MAP2K4, MAP3K14, MAPK8, MAPK9, NFKB1, NFKB2, NFKBIA, NR1H2, NR1H3, NR1H4, NR1I2, NR5A2, PPARA, PRKACA, PRKCA, PRKCB, PRKCD, PRKCI, PRKCZ, RARA, REL, RELA, RXRA, SLC10A1, SREBF1, TRAF2, TRAF6
VEGF Signaling	8.51138e-08	0.253	25	ACTA2, ACTB, ACTN1, AKT1, ARNT, BAD, BCL2, BCL2L1, FOXO1, FOXO3, GRB2, HIF1A, MAP2K1, MAPK1, MAPK3, NOS3, PIK3R1, PIK3R3, PRKCA, PRKCB, RAP1B, SFN, SH2D2A, SRC, YWHAE
MIF Regulation of Innate Immunity	1.04713e-07	0.364	16	CD74, FOS, JUN, MAP2K4, MAPK1, MAPK3, MAPK8, MAPK9, NFKB1, NFKB2, NFKBIA, PLA2G12B, PLA2G5, REL, RELA, TP53
White Adipose Tissue Browning Pathway	1.04713e-07	0.221	30	ATF4, CACNA1A, CEBPB, CREB1, CREB3, CREBBP, CTBP1, CTBP2, FGFR1, FGFR4, GUCY1A1, GUCY1B1, MAPK1, MAPK14, PPARA, PPARG, PPARGC1A, PRKAA1, PRKAA2, PRKAB2, PRKACA, RARA, RARB, RARG, RUNX1T1, RXRA, RXRB, SIRT1, THRA, THRB
CXCR4 Signaling	1.07152e-07	0.204	34	AKT1, ARHGEF11, CDC42, CRK, CXCL12, EGR1, ELK1, FOS, GNA14, GNAI2, GNB1, GNB2, GNB5, JUN, MAP2K1, MAP2K4, MAPK1, MAPK3, MAPK8, MAPK9, MYL9, PAK2, PIK3R1, PIK3R3, PRKCA, PRKCB, PRKCD, PRKCI, PRKCZ, RAC1, RAP1B, RHOA, RND1, SRC
Inhibition of Angiogenesis by TSP1	1.1749e-07	0.412	14	AKT1, CASP3, GUCY1A1, GUCY1B1, JUN, MAP2K4, MAPK1, MAPK14, MAPK8, MAPK9, NOS3, TGFBR1, THBS1, TP53
Th2 Pathway	1.20226e-07	0.219	30	ACVR2B, APH1A, APH1B, BMPR2, CCR1, CCR4, CD40, CHD4, DLL1, GRB2, ICOS, JAK1, JUN, MAF, NCSTN, NFATC2, NFKB1, NOTCH1, NOTCH2, NOTCH3, NOTCH4, PIK3R1, PIK3R3, PSEN1, PSENEN, RUNX3, STAT5A, STAT5B, STAT6, TGFBR1
ErbB4 Signaling	1.28825e-07	0.294	20	AKT1, APH1A, APH1B, GRB2, MAP2K1, MAPK1, MAPK3, NCSTN, NRG2, PDPK1, PIK3R1, PIK3R3, PRKCA, PRKCB, PRKCD, PRKCI, PRKCZ, PSEN1, PSENEN, RAP1B
Leukocyte Extravasation Signaling	1.41254e-07	0.192	37	ABL1, ACTA2, ACTB, ACTN1, ARHGAP8/PRR5-ARHGAP8, CDC42, CDH5, CRK, CTNNA1, CTNNA3, CTNNB1, CTNND1, CTTN, CXCL12, DLC1, EZR, FER, GNAI2, MAP2K4, MAPK1, MAPK14, MAPK8, MAPK9, MSN, PIK3R1, PIK3R3, PRKCA, PRKCB, PRKCD, PRKCI, PRKCZ, RAC1, RAP1B, RDX, RHOA, SRC, TXK
Gαq Signaling	1.65959e-07	0.2	34	AKT1, CALM1 (includes others), CDC42, CHUK, ELK1, GNA14, GNAI2, GNB1, GNB2, GNB5, GSK3B, IKBKB, MAP2K1, MAPK1, MAPK3, NFATC1, NFATC2, NFKB1, NFKB2, NFKBIA, PIK3R1, PIK3R3, PLD2, PRKCA, PRKCB, PRKCD, PRKCI, PRKCZ, RAC1, REL, RELA, RGS2, RHOA, RND1
IL-9 Signaling	1.77828e-07	0.4	14	BCL3, IRS1, IRS2, JAK1, NFKB1, NFKB2, PIK3R1, PIK3R3, REL, RELA, STAT1, STAT3, STAT5A, STAT5B
NRF2-mediated Oxidative Stress Response	1.8197e-07	0.177	42	ACTA2, ACTB, AKT1, ATF4, CREBBP, CUL3, CYP2C18, CYP2C8, DNAJB12, DNAJC9, EP300, FOS, FOSL1, GSK3B, GSTZ1, HERPUD1, JUN, JUNB, JUND, MAF, MAP2K1, MAP2K4, MAP2K5, MAP3K5, MAPK1, MAPK14, MAPK3, MAPK8, MAPK9, NQO1, PIK3R1, PIK3R3, PRKCA, PRKCB, PRKCD, PRKCI, PRKCZ, RAP1B, RBX1, STIP1, TXN, VCP
Role of RIG1-like Receptors in Antiviral Innate Immunity	2.04174e-07	0.348	16	CASP10, CASP8, CHUK, CREBBP, EP300, IKBKB, IRF3, IRF7, NFKB1, NFKB2, NFKBIA, REL, RELA, RIPK1, TRAF2, TRAF6
Agrin Interactions at Neuromuscular Junction	2.13796e-07	0.286	20	ACTA2, ACTB, CDC42, CTTN, DAG1, EGFR, ERBB2, ERBB3, GABPA, JUN, MAP2K4, MAPK1, MAPK3, MAPK8, MAPK9, NRG2, PAK2, RAC1, RAP1B, SRC
Th1 and Th2 Activation Pathway	2.13796e-07	0.198	34	ACVR2B, APH1A, APH1B, BMPR2, CCR1, CCR4, CD40, CHD4, DLL1, GRB2, ICOS, IRF1, JAK1, JUN, MAF, NCSTN, NFATC1, NFATC2, NFKB1, NOTCH1, NOTCH2, NOTCH3, NOTCH4, PIK3R1, PIK3R3, PSEN1, PSENEN, RUNX3, STAT1, STAT3, STAT5A, STAT5B, STAT6, TGFBR1
Corticotropin Releasing Hormone Signaling	2.39883e-07	0.208	31	ATF4, CACNA1A, CALM1 (includes others), CREB1, CREB3, CREBBP, ELK1, FOS, GNAI2, GUCY1A1, GUCY1B1, JUN, JUND, KRT1, MAP2K1, MAPK1, MAPK14, MAPK3, MEF2A, MEF2C, MEF2D, NOS3, NR4A1, POMC, PRKACA, PRKCA, PRKCB, PRKCD, PRKCI, PRKCZ, RAP1B
UVA-Induced MAPK Signaling	2.75423e-07	0.245	24	ATM, BCL2L1, CASP3, CYCS, EGFR, FOS, JUN, MAP2K4, MAPK1, MAPK14, MAPK3, MAPK8, MAPK9, MTOR, PIK3R1, PIK3R3, PRKCA, RAP1B, RPS6KA1, RPS6KA5, RPS6KB1, RPS6KB2, STAT1, TP53
Insulin Secretion Signaling Pathway	3.16228e-07	0.168	45	AGO1, AGO2, ATF4, CACNA1A, CREB1, CREB3, CREBBP, EIF4A3, EIF4EBP1, EIF4EBP2, GNA14, HNF1A, JAK1, MAPK1, MAPK14, MAPK3, MTOR, NEUROD1, PABPC1, PCSK1, PDHB, PDHX, PIK3R1, PIK3R3, PRKACA, PRKCA, PRKCB, PRKCD, PRKCI, PRKCZ, RAP1B, RPS6KA5, RPS6KB1, RPS6KB2, RYR2, SRC, STAT1, STAT2, STAT3, STAT5A, STAT5B, STAT6, STX1B, TCF3, YES1
P2Y Purigenic Receptor Signaling Pathway	3.89045e-07	0.217	28	AKT1, ATF4, CREB1, CREB3, CREBBP, FOS, GNAI2, GNB1, GNB2, GNB5, JUN, MAP2K1, MAPK1, MAPK3, MYC, NFKB1, NFKB2, PIK3R1, PIK3R3, PRKACA, PRKCA, PRKCB, PRKCD, PRKCI, PRKCZ, RAP1B, REL, RELA
Melanocyte Development and Pigmentation Signaling	5.01187e-07	0.245	23	ATF4, BCL2, CREB1, CREB3, CREBBP, CRK, DCT, EP300, GRB2, MAP2K1, MAPK1, MAPK3, MITF, PIK3R1, PIK3R3, POMC, PRKACA, RAP1B, RPS6KA1, RPS6KA5, RPS6KB1, RPS6KB2, SRC
Role of NFAT in Cardiac Hypertrophy	5.01187e-07	0.177	39	AKT1, CACNA1A, CALM1 (includes others), CSNK1A1, CTF1, EP300, GATA4, GNAI2, GNB1, GNB2, GNB5, GRB2, GSK3B, HDAC1, HDAC3, HDAC5, HDAC6, MAP2K1, MAP2K4, MAPK1, MAPK14, MAPK3, MAPK8, MAPK9, MEF2A, MEF2C, MEF2D, PIK3R1, PIK3R3, PRKACA, PRKCA, PRKCB, PRKCD, PRKCI, PRKCZ, RAP1B, SHC3, SRC, TGFBR1
IL-1 Signaling	5.01187e-07	0.245	23	CHUK, ECSIT, FOS, GNA14, GNAI2, GNB1, GNB2, GNB5, IKBKB, JUN, MAP2K4, MAP3K14, MAPK1, MAPK14, MAPK8, MAPK9, NFKB1, NFKB2, NFKBIA, PRKACA, REL, RELA, TRAF6
IL-2 Signaling	5.24807e-07	0.295	18	AKT1, CSNK2A1, CSNK2B, ELK1, FOS, GRB2, JAK1, JUN, MAP2K1, MAPK1, MAPK3, MAPK8, PIK3R1, PIK3R3, RAP1B, STAT5A, STAT5B, SYK
fMLP Signaling in Neutrophils	5.24807e-07	0.214	28	ARPC3, CALM1 (includes others), CDC42, ELK1, GNA14, GNAI2, GNB1, GNB2, GNB5, MAP2K1, MAPK1, MAPK3, NFATC1, NFATC2, NFKB1, NFKB2, NFKBIA, PIK3R1, PIK3R3, PRKCA, PRKCB, PRKCD, PRKCI, PRKCZ, RAC1, RAP1B, REL, RELA
Tumor Microenvironment Pathway	5.62341e-07	0.19	34	AKT1, ARAF, BAD, BCL2, CCL2, CCND1, CXCL12, CXCL8, FGF11, FGF13, FN1, FOS, FOXO1, FOXO3, HIF1A, JUN, MAP2K1, MAP3K14, MAPK1, MAPK3, MYC, NFKB1, NFKB2, PDCD1LG2, PDGFB, PIK3R1, PIK3R3, PLAU, RAC1, RAP1B, REL, RELA, SPP1, STAT3
DNA damage-induced 14-3-3σ Signaling	5.62341e-07	0.526	10	AKT1, ATM, ATR, BRCA1, CCNB1, CCNE1, CDK1, CDK2, SFN, TP53
Sertoli Cell-Sertoli Cell Junction Signaling	7.24436e-07	0.18	37	A2M, ACTA2, ACTB, ACTN1, AKT1, CDC42, CDH1, CTNNA1, CTNNB1, ELK1, GSK3B, GUCY1A1, GUCY1B1, JUN, JUP, MAGI2, MAP2K1, MAP2K4, MAP3K12, MAP3K14, MAP3K5, MAP3K8, MAPK1, MAPK14, MAPK3, MAPK8, MAPK9, NOS3, PRKACA, PTEN, RAC1, RAP1B, SRC, TUBA1B, TUBB, TUBB3, TUBB4B
Human Embryonic Stem Cell Pluripotency	8.70964e-07	0.193	32	AKT1, BMPR2, CTNNB1, FGFR1, FGFR4, FOXO1, FZD1, FZD5, GNA14, GNAI2, GNB1, GNB2, GNB5, GSK3B, HNF1A, LEF1, PDGFB, PDPK1, PIK3R1, PIK3R3, SMAD1, SMAD2, SMAD3, SMAD4, SMAD5, SMAD7, SPHK1, TCF3, TCF4, TCF7L2, TGFBR1, WNT5A
Endothelin-1 Signaling	9.12011e-07	0.183	35	ARAF, CASP1, CASP10, CASP3, CASP4, CASP6, CASP7, CASP8, FOS, GNA14, GNAI2, GRB2, GUCY1A1, GUCY1B1, JUN, MAPK1, MAPK14, MAPK3, MAPK8, MAPK9, MYC, NOS3, PIK3R1, PIK3R3, PLA2G12B, PLA2G5, PLD2, PRKCA, PRKCB, PRKCD, PRKCI, PRKCZ, RAP1B, SHC3, SRC
Ceramide Signaling	9.12011e-07	0.244	22	AKT1, BAD, BCL2, CYCS, FOS, JUN, MAP2K1, MAP2K4, MAPK3, MAPK8, NFKB1, NFKB2, PIK3R1, PIK3R3, PPP2R5C, PPP2R5E, PRKCZ, PTPA, RAP1B, REL, RELA, SPHK1
Role of p14/p19ARF in Tumor Suppression	9.12011e-07	0.414	12	CDKN2A, E2F1, MDM2, NPM1, PIK3R1, PIK3R3, POLR3D, RAC1, RB1, SENP3, TP53, UBTF
Angiopoietin Signaling	1.07152e-06	0.26	20	AKT1, BAD, CHUK, CRK, FOXO1, GRB2, GRB7, IKBKB, NFKB1, NFKB2, NFKBIA, NOS3, PAK2, PIK3R1, PIK3R3, RAP1B, REL, RELA, STAT5A, STAT5B
Salvage Pathways of Pyrimidine Ribonucleotides	1.07152e-06	0.235	23	ARAF, CDK1, CDK2, CDK4, CDK5, CDK6, CSNK1A1, LIMK2, MAP2K1, MAP2K4, MAP3K8, MAPK1, MAPK3, MAPK8, MAPK9, NME1, NME7, PAK2, PLK1, PRKAA1, PRKAA2, PRKCD, TTK
Ephrin Receptor Signaling	1.07152e-06	0.179	36	ABI1, ABL1, ADAM10, AKT1, ARPC3, ATF4, CDC42, CFL1, CREB1, CREB3, CREBBP, CRK, CXCL12, EFNB2, EPHB3, EPHB6, GNA14, GNAI2, GNB1, GNB2, GNB5, GRB2, ITSN1, LIMK2, MAP2K1, MAP3K14, MAPK1, MAPK3, NCK2, PAK2, PDGFB, RAC1, RAP1B, RHOA, SRC, STAT3
Apelin Pancreas Signaling Pathway	1.23027e-06	0.326	15	DDIT3, ERN1, MAP2K4, MAPK8, MAPK9, NFKB1, NFKB2, PIK3R1, PIK3R3, PRKAA1, PRKAA2, PRKAB2, PRKACA, REL, RELA
Role of JAK family kinases in IL-6-type Cytokine Signaling	1.31826e-06	0.44	11	JAK1, MAP2K4, MAPK1, MAPK14, MAPK3, MAPK8, MAPK9, STAT1, STAT3, STAT5A, STAT5B
PXR/RXR Activation	1.41254e-06	0.277	18	AKT1, CES2, CYP2C8, FOXO1, FOXO3, HNF4A, NCOA1, NR1I2, NR1I3, NR3C1, PCK2, PPARA, PPARGC1A, PRKACA, RELA, RXRA, SULT2A1, UGT1A1
Breast Cancer Regulation by Stathmin1	2.18776e-06	0.128	76	ADRB2, ARHGEF11, ARHGEF12, ATF4, AURKA, BDKRB2, CCND1, CCND2, CCR1, CCR4, CCR9, CDK1, CDK2, CDK4, CDK6, CDKN1B, CREB1, CREB3, CREBBP, E2F1, E2F5, F2RL1, F2RL2, FZD1, FZD5, GNB1, GNB2, GNB5, GPR15, GPR152, GPR158, GPR27, GPR45, GRB2, HIF1A, HRH4, JUN, LPAR6, MAP2K1, MAPK1, MAPK3, MCHR1, MTNR1A, MTOR, NFKB1, NFKB2, PDGFB, PIK3R1, PIK3R3, PPP1CA, PPP1CB, PPP1CC, PPP1R3A, PPP1R7, PPP2R5C, PPP2R5E, PR…
FXR/RXR Activation	2.69153e-06	0.206	26	AKT1, APOE, CREBBP, CYP27A1, FGFR4, FOXA2, FOXO1, HNF1A, HNF4A, MAP2K4, MAPK8, MAPK9, MLXIPL, NR1H3, NR1H4, NR1I2, NR5A2, PCK2, PPARA, PPARG, PPARGC1A, RARA, RXRA, SLC10A1, SREBF1, SULT2A1
Oncostatin M Signaling	2.95121e-06	0.326	14	CHI3L1, ELK1, EPAS1, GRB2, JAK1, MAP2K1, MAPK1, MAPK3, PLAU, RAP1B, STAT1, STAT3, STAT5A, STAT5B
CCR3 Signaling in Eosinophils	3.23594e-06	0.2	27	CALM1 (includes others), CCL26, CFL1, GNA14, GNAI2, GNB1, GNB2, GNB5, LIMK2, MAP2K1, MAPK1, MAPK14, MAPK3, PAK2, PIK3R1, PIK3R3, PLA2G12B, PLA2G5, PPP1CB, PRKCA, PRKCB, PRKCD, PRKCI, PRKCZ, RAC1, RAP1B, RHOA
Cell Cycle Control of Chromosomal Replication	3.71535e-06	0.286	16	CDC6, CDK1, CDK2, CDK3, CDK4, CDK5, CDK6, CDT1, MCM2, MCM3, MCM4, MCM5, ORC2, ORC5, PCNA, POLA2
Role of MAPK Signaling in Inhibiting the Pathogenesis of Influenza	3.71535e-06	0.25	19	ARAF, CASP3, CCL2, CCL5, CXCL8, JUN, MAP2K1, MAP2K4, MAP3K5, MAPK1, MAPK14, MAPK3, MAPK8, MAPK9, NFKB1, NFKB2, NFKBIA, PLA2G12B, PLA2G5
Notch Signaling	3.71535e-06	0.342	13	APH1A, APH1B, DLL1, DTX1, DTX2, MAML1, NCSTN, NOTCH1, NOTCH2, NOTCH3, NOTCH4, PSEN1, PSENEN
GM-CSF Signaling	4.46684e-06	0.257	18	AKT1, BCL2L1, CCND1, ELK1, ETS1, GRB2, MAP2K1, MAPK1, MAPK3, PIK3R1, PIK3R3, PRKCB, RACK1, RAP1B, RUNX1, STAT1, STAT3, STAT5B
TREM1 Signaling	4.57088e-06	0.247	19	AKT1, CASP1, CCL2, CCL3, CCL7, CD40, CIITA, CXCL8, GRB2, MAPK1, MAPK3, NFKB1, NFKB2, REL, RELA, STAT3, STAT5A, STAT5B, TLR8
CNTF Signaling	4.67735e-06	0.281	16	AKT1, GRB2, JAK1, MAP2K1, MAPK1, MAPK3, MTOR, PIK3R1, PIK3R3, RAP1B, RPS6KA1, RPS6KA5, RPS6KB1, RPS6KB2, STAT1, STAT3
Xenobiotic Metabolism CAR Signaling Pathway	5.37032e-06	0.175	33	CITED2, CREBBP, CYP2C8, EGFR, EP300, GRIP1, GSTZ1, MAP2K1, MAP2K4, MAP2K5, MAPK1, MAPK3, NCOA1, NR1I3, PPARGC1A, PPP2R5C, PPP2R5E, PRKCA, PRKCB, PRKCD, PRKCI, PRKCZ, PTPA, RACK1, RXRA, SNW1, SRC, SULT1A2, SULT1A3/SULT1A4, SULT1C4, SULT2A1, UGT1A1, UGT1A3
PFKFB4 Signaling Pathway	7.07946e-06	0.304	14	ATF4, CREB1, CREB3, CREBBP, FBP2, MAP2K1, MAP2K4, MAP2K5, MAPK1, MAPK3, NCOA3, PRKACA, RPS6KA5, TP53
IL-23 Signaling Pathway	7.07946e-06	0.304	14	AKT1, FOXP3, HIF1A, IL23A, NFKB1, NFKB2, NFKBIA, PIK3R1, PIK3R3, REL, RELA, RORA, RUNX1, STAT3
Role of PI3K/AKT Signaling in the Pathogenesis of Influenza	8.12831e-06	0.258	17	AKT1, CCL5, CRK, GNAI2, GSK3B, IRF3, MAP2K1, MAPK1, MAPK3, MLH1, NFKB1, NFKB2, NFKBIA, PIK3R1, PIK3R3, REL, RELA
HMGB1 Signaling	8.31764e-06	0.18	30	AKT1, CCL2, CDC42, CXCL8, ELK1, FOS, HMGB1, JUN, KAT2A, KAT2B, MAP2K1, MAP2K4, MAP2K5, MAPK1, MAPK14, MAPK3, MAPK8, MAPK9, NFKB1, NFKB2, PIK3R1, PIK3R3, PLAT, RAC1, RAP1B, REL, RELA, RHOA, RND1, SP1
Virus Entry via Endocytic Pathways	1.09648e-05	0.212	22	ABL1, ACTA2, ACTB, AP1M2, AP2B1, AP3S1, CDC42, CLTC, CXADR, FLNA, FLNB, ITSN1, PIK3R1, PIK3R3, PRKCA, PRKCB, PRKCD, PRKCI, PRKCZ, RAC1, RAP1B, SRC
Transcriptional Regulatory Network in Embryonic Stem Cells	1.09648e-05	0.278	15	CDX2, GATA4, GATA6, H3-3A/H3-3B, H4-16, H4C1, H4C14, H4C9, HNF4A, HOXB1, L1CAM, PAX6, SET, SKIL, STAT3
Role of NANOG in Mammalian Embryonic Stem Cell Pluripotency	1.14815e-05	0.2	24	AKT1, BMPR2, CDX2, CTNNB1, FZD1, FZD5, GATA4, GATA6, GRB2, GSK3B, JAK1, MAP2K1, MAPK1, MAPK3, PIK3R1, PIK3R3, RAP1B, SMAD1, SMAD4, SMAD5, STAT3, TCL1A, TP53, WNT5A
Relaxin Signaling	1.20226e-05	0.183	28	AKT1, APEX1, CREB1, ELK1, FOS, GNA14, GNAI2, GNB1, GNB2, GNB5, GUCY1A1, GUCY1B1, JUN, MAP2K1, MAPK1, MAPK3, NFKB1, NFKB2, NFKBIA, NOS3, PIK3R1, PIK3R3, PRKACA, PRKCZ, RAP1B, REL, RELA, TDP2
Remodeling of Epithelial Adherens Junctions	1.23027e-05	0.25	17	ACTA2, ACTB, ACTN1, ARF6, ARPC3, CDH1, CTNNA1, CTNNB1, CTNND1, HGS, MAPRE2, NME1, SRC, TUBA1B, TUBB, TUBB3, TUBB4B
Rac Signaling	1.44544e-05	0.188	26	ABI2, ARPC3, CDC42, CFL1, ELK1, JUN, LIMK2, MAP2K1, MAP2K4, MAPK1, MAPK3, MAPK8, NFKB1, NFKB2, PAK2, PARD3, PIK3R1, PIK3R3, PRKCI, PRKCZ, RAC1, RAP1B, REL, RELA, RHOA, RPS6KB1
Gap Junction Signaling	1.44544e-05	0.167	33	ACTA2, ACTB, AKT1, CSNK1A1, CTNNB1, DBN1, EGFR, GJA8, GJB2, GNAI2, GRB2, GUCY1A1, GUCY1B1, MAP2K1, MAP2K5, MAPK1, MAPK3, PIK3R1, PIK3R3, PRKACA, PRKCA, PRKCB, PRKCD, PRKCI, PRKCZ, RAP1B, SP1, SP3, SRC, TUBA1B, TUBB, TUBB3, TUBB4B
GDNF Family Ligand-Receptor Interactions	1.47911e-05	0.237	18	CDC42, CREB1, DOK5, FOS, GRB2, IRS1, IRS2, JUN, MAP2K1, MAP2K4, MAPK1, MAPK3, MAPK8, MAPK9, PIK3R1, PIK3R3, RAC1, RAP1B
Cell Cycle Regulation by BTG Family Proteins	1.65959e-05	0.324	12	CCND1, CCNE1, CDK2, CDK4, E2F1, E2F5, HOXB9, PPP2R5C, PPP2R5E, PRMT1, PTPA, RB1
Xenobiotic Metabolism PXR Signaling Pathway	1.94984e-05	0.167	32	CDK2, CDK5, CES2, CITED2, CREBBP, CYP2C8, EP300, GRIP1, GSTZ1, NCOA1, NCOR1, NR1I2, PPARGC1A, PPP1CA, PPP1CB, PPP1CC, PPP1R3A, PPP1R7, PRKACA, PRKCA, PRKCB, PRKCD, PRKCI, PRKCZ, RXRA, SNW1, SULT1A2, SULT1A3/SULT1A4, SULT1C4, SULT2A1, UGT1A1, UGT1A3
Docosahexaenoic Acid (DHA) Signaling	2.23872e-05	0.316	12	AKT1, APP, BAD, BCL2, BCL2L1, CASP3, CYCS, FOXO1, GSK3B, PDPK1, PIK3R1, PIK3R3
MSP-RON Signaling In Macrophages Pathway	2.34423e-05	0.197	23	ATF4, CHUK, CIITA, CREB1, CREB3, CREBBP, FOS, GRB2, IKBKB, JUN, MAPK1, MAPK3, NFKB1, NFKB2, PIK3R1, PIK3R3, PRKCZ, RAP1B, REL, RELA, ST14, STAT1, STAT3
Melatonin Signaling	2.69153e-05	0.236	17	ARAF, CALM1 (includes others), GNAI2, MAP2K1, MAP2K4, MAP2K5, MAPK1, MAPK3, MTNR1A, PRKACA, PRKCA, PRKCB, PRKCD, PRKCI, PRKCZ, RORA, RORB
Cancer Drug Resistance By Drug Efflux	2.69153e-05	0.259	15	AKT1, ARAF, FOXO1, FOXO3, MAP2K1, MAPK1, MAPK3, MDM2, NFKB1, PIK3R1, PIK3R3, PTEN, RAP1B, TP53, YBX1
Tight Junction Signaling	2.88403e-05	0.169	30	ACTA2, ACTB, AKT1, CDC42, CDK4, CEBPA, CSTF2, CTNNA1, CTNNB1, F2RL2, FOS, JUN, MAGI2, MYL9, NFKB1, NFKB2, NUDT21, PPP2R5C, PPP2R5E, PRKACA, PRKCI, PRKCZ, PTEN, PTPA, RAC1, REL, RELA, RHOA, STX1B, TGFBR1
RhoGDI Signaling	3.23594e-05	0.158	34	ACTA2, ACTB, ARHGAP8/PRR5-ARHGAP8, ARHGDIA, ARHGEF11, ARHGEF12, ARPC3, CDC42, CDH1, CDH16, CDH5, CFL1, CREBBP, DLC1, EP300, ESR1, ESR2, EZR, GNA14, GNAI2, GNB1, GNB2, GNB5, GRIP1, LIMK2, MSN, MYL9, PAK2, PRKCA, RAC1, RDX, RHOA, RND1, SRC
CDK5 Signaling	3.63078e-05	0.196	22	ABL1, CACNA1A, CDK5, EGR1, FOSB, MAP2K1, MAPK1, MAPK14, MAPK3, MAPK8, MAPK9, MAPT, PPP1CA, PPP1CB, PPP1CC, PPP1R3A, PPP1R7, PPP2R5C, PPP2R5E, PRKACA, PTPA, RAP1B
Th1 Pathway	4.67735e-05	0.189	23	APH1A, APH1B, CD40, DLL1, GRB2, ICOS, IRF1, JAK1, NCSTN, NFATC1, NFATC2, NFKB1, NOTCH1, NOTCH2, NOTCH3, NOTCH4, PIK3R1, PIK3R3, PSEN1, PSENEN, RUNX3, STAT1, STAT3
Mechanisms of Viral Exit from Host Cells	5.12861e-05	0.293	12	ACTA2, ACTB, CHMP2A, NEDD4, PRKCA, PRKCB, PRKCD, PRKCI, PRKCZ, SNF8, TSG101, VPS37C
DNA Methylation and Transcriptional Repression Signaling	5.37032e-05	0.314	11	ARID4B, CHD3, CHD4, DNMT3B, H3-3A/H3-3B, H4-16, H4C1, H4C14, H4C9, HDAC1, SAP130
Role of JAK1 and JAK3 in γc Cytokine Signaling	6.0256e-05	0.232	16	GRB2, IL7R, IRS1, IRS2, JAK1, MAPK1, MAPK3, PIK3R1, PIK3R3, RAP1B, STAT1, STAT3, STAT5A, STAT5B, STAT6, SYK
BAG2 Signaling Pathway	6.0256e-05	0.214	18	ATXN3, CASP3, MAPK1, MAPK14, MAPK3, MAPT, MDM2, MYC, NFKB1, NFKB2, PSMA5, PSMB1, PSMB9, REL, RELA, SP1, TP53, UBE2D1
Granzyme A Signaling	6.30957e-05	0.421	8	APEX1, CREBBP, EP300, H1-1, H1-3, HMGB2, NME1, SET
Integrin Signaling	6.45654e-05	0.155	33	ABL1, ACTA2, ACTB, ACTN1, AKT1, ARF1, ARF6, ARPC3, CDC42, CRK, CTTN, GRB2, GRB7, GSK3B, LIMS1, MAP2K1, MAP2K4, MAPK1, MAPK3, MAPK8, MYL9, NCK2, PAK2, PDGFB, PIK3R1, PIK3R3, PPP1CB, PTEN, RAC1, RAP1B, RHOA, RND1, SRC
MIF-mediated Glucocorticoid Regulation	7.07946e-05	0.306	11	CD74, MAPK1, MAPK3, NFKB1, NFKB2, NFKBIA, NR3C1, PLA2G12B, PLA2G5, REL, RELA
NAD Signaling Pathway	7.07946e-05	0.172	26	AKT1, ARNTL, CEBPB, CLOCK, ERN1, ETFA, GSK3B, H1-1, H1-3, HIF1A, NFKB1, NFKB2, NKX2-1, PDGFB, PIK3R1, PIK3R3, POLR2G, PPARGC1A, PRKAA1, PRKAA2, PRKAB2, RYR2, SIRT1, SIRT2, SREBF1, TP53
Fc Epsilon RI Signaling	7.07946e-05	0.188	22	AKT1, GRB2, MAP2K1, MAP2K4, MAPK1, MAPK14, MAPK3, MAPK8, MAPK9, PDPK1, PIK3R1, PIK3R3, PLA2G12B, PLA2G5, PRKCA, PRKCB, PRKCD, PRKCI, PRKCZ, RAC1, RAP1B, SYK
EIF2 Signaling	7.4131e-05	0.152	34	ACTA2, ACTB, AGO1, AGO2, AKT1, ATF4, ATF5, BCL2, CCND1, DDIT3, EIF4A3, GRB2, GSK3B, MAP2K1, MAPK1, MAPK3, MYC, PABPC1, PDPK1, PIK3R1, PIK3R3, PPP1CA, PPP1CB, PPP1CC, PTBP1, RAP1B, RPL19, RPL23A, RPL27, RPL5, RPS15, RPS24, RPS4Y1, SREBF1
Sperm Motility	8.51138e-05	0.146	37	ABL1, CALM1 (includes others), CLK1, DDR2, DYRK4, EGFR, EPHB3, ERBB2, ERBB3, FER, FGFR1, FGFR4, GNA14, GNAI2, GNB1, GNB2, GNB5, GUCY1A1, GUCY1B1, JAK1, MAP2K1, MAP2K4, MAP2K5, PLA2G12B, PLA2G5, PRKACA, PRKCA, PRKCB, PRKCD, PRKCI, PRKCZ, ROR2, SRC, SYK, TXK, YES1, ZAN
Telomere Extension by Telomerase	8.91251e-05	0.467	7	MRE11, NBN, POT1, RAD50, TERF1, TERF2, XRCC6
Wnt/Ca+ pathway	8.91251e-05	0.234	15	ATF4, CREB1, CREB3, CREBBP, FZD1, FZD5, GSK3B, NFATC1, NFATC2, NFKB1, NFKB2, PRKCA, REL, RELA, WNT5A
Synaptic Long Term Potentiation	0.000109648	0.178	23	ATF4, CALM1 (includes others), CREB1, CREB3, CREBBP, EP300, GNA14, MAP2K1, MAPK1, MAPK3, PPP1CA, PPP1CB, PPP1CC, PPP1R3A, PPP1R7, PRKACA, PRKCA, PRKCB, PRKCD, PRKCI, PRKCZ, RAP1B, RPS6KA1
Role of MAPK Signaling in the Pathogenesis of Influenza	0.000125893	0.21	17	AKT1, BCL2, CASP3, CCL2, CCL5, MAP2K1, MAP2K4, MAP3K5, MAPK1, MAPK14, MAPK3, MAPK8, MAPK9, PLA2G12B, PLA2G5, PRKCA, RAP1B
Iron homeostasis signaling pathway	0.000128825	0.173	24	ARNT, BMPR2, BTRC, EGFR, EPAS1, EPO, FBXL5, HAMP, HBA1/HBA2, HIF1A, JAK1, MAPK1, MAPK3, PCBP1, PDGFB, SKP2, SMAD1, SMAD2, SMAD3, SMAD4, SMAD5, STAT3, STAT5A, STAT5B
Endoplasmic Reticulum Stress Pathway	0.000141254	0.381	8	ATF4, CASP3, CASP7, DDIT3, ERN1, MAP3K5, MAPK8, TRAF2
PD-1, PD-L1 cancer immunotherapy pathway	0.000144544	0.189	20	AKT1, BCL2L1, CDK2, CDKN1B, CSNK2A1, CSNK2B, ELK1, FOXP3, GSK3B, JAK1, LATS2, PDCD1LG2, PDCD4, PIK3R1, PIK3R3, PTEN, SKP2, SMAD3, STAT5A, STAT5B
Apelin Cardiomyocyte Signaling Pathway	0.000169824	0.192	19	AKT1, ARNT, ATP2A3, GNAI2, HIF1A, MAPK1, MAPK14, MAPK3, MAPK8, MAPK9, MYL9, NOS3, PIK3R1, PIK3R3, PRKCA, PRKCB, PRKCD, PRKCI, PRKCZ
Semaphorin Neuronal Repulsive Signaling Pathway	0.00018197	0.166	25	AKT1, ARHGEF12, CDK5, CFL1, CRMP1, ERBB2, GSK3B, GUCY1A1, GUCY1B1, LIMK2, MAP2K1, MAP2K4, MAP2K5, MAPT, MYL9, PAK2, PIK3R1, PIK3R3, PPP1CB, PRKACA, RAC1, RHOA, RND1, SEMA6A, TP53
Paxillin Signaling	0.000186209	0.185	20	ACTA2, ACTB, ACTN1, ARF1, ARF6, CDC42, CRK, GRB2, MAP2K4, MAPK1, MAPK14, MAPK8, MAPK9, NCK2, PAK2, PIK3R1, PIK3R3, RAC1, RAP1B, SRC
VEGF Family Ligand-Receptor Interactions	0.000199526	0.202	17	AKT1, FOS, GRB2, MAP2K1, MAPK1, MAPK3, NOS3, PIK3R1, PIK3R3, PLA2G12B, PLA2G5, PRKCA, PRKCB, PRKCD, PRKCI, PRKCZ, RAP1B
Ferroptosis Signaling Pathway	0.000213796	0.175	22	ARAF, ARF1, ARF6, ATF4, BECN1, G3BP1, H2AC18/H2AC19, H2AZ1, HSPB1, MAP2K1, MAPK1, MAPK3, PRKAA1, PRKAA2, PRKAB2, RAP1B, RB1, SAT1, SP1, SREBF2, STAT3, TP53
STAT3 Pathway	0.000218776	0.17	23	BCL2, BMPR2, CDC25A, EGFR, FGFR1, FGFR4, IL7R, MAP2K1, MAP2K4, MAP3K12, MAPK1, MAPK14, MAPK3, MAPK8, MAPK9, MYC, PDGFB, PIAS3, RAC1, RAP1B, SRC, STAT3, TGFBR1
Nitric Oxide Signaling in the Cardiovascular System	0.00025704	0.176	21	AKT1, ATP2A3, BDKRB2, CACNA1A, CALM1 (includes others), GUCY1A1, GUCY1B1, MAP2K1, MAPK1, MAPK3, NOS3, PIK3R1, PIK3R3, PRKAA1, PRKACA, PRKCA, PRKCB, PRKCD, PRKCI, PRKCZ, RYR2
G Beta Gamma Signaling	0.000301995	0.171	22	AKT1, CACNA1A, CDC42, EGFR, GNA14, GNAI2, GNB1, GNB2, GNB5, GRB2, HBEGF, MAPK1, MAPK3, PDPK1, PRKACA, PRKCA, PRKCB, PRKCD, PRKCI, PRKCZ, RAP1B, SRC
Role of Pattern Recognition Receptors in Recognition of Bacteria and Viruses	0.000301995	0.16	25	CASP1, CCL5, CREB1, CXCL8, IRF3, IRF7, MAP2K4, MAPK1, MAPK3, MAPK8, MAPK9, NFKB1, NFKB2, PIK3R1, PIK3R3, PRKCA, PRKCB, PRKCD, PRKCI, PRKCZ, REL, RELA, SYK, TLR8, TRAF6
Antioxidant Action of Vitamin C	0.00030903	0.179	20	CHUK, IKBKB, MAP2K4, MAPK1, MAPK14, MAPK3, MAPK8, MAPK9, NFKB1, NFKB2, NFKBIA, PLA2G12B, PLA2G5, PLD2, REL, RELA, STAT5A, STAT5B, TXN, TXNRD3
Role of MAPK Signaling in Promoting the Pathogenesis of Influenza	0.00030903	0.179	20	ARAF, BCL2, BECN1, CASP3, JUN, MAP2K1, MAP2K4, MAP3K5, MAPK1, MAPK14, MAPK3, MAPK8, MAPK9, NFKB1, NFKB2, NFKBIA, PLA2G12B, PLA2G5, PRKCA, RAP1B
Kinetochore Metaphase Signaling Pathway	0.000371535	0.181	19	ANAPC2, CCNB1, CDK1, DNAH1, ENSA, H2AC18/H2AC19, H2AZ1, KAT5, MASTL, MIS12, PLK1, PPP1CA, PPP1CB, PPP1CC, PPP1R3A, PPP1R7, PPP2R5C, PPP2R5E, TTK
Regulation of Cellular Mechanics by Calpain Protease	0.00040738	0.191	17	ACTN1, CCND1, CCND2, CCNE1, CDK1, CDK2, CDK4, CDK6, CDKN1B, EGFR, EZR, GRB2, MAPK1, MAPK3, RAP1B, RB1, SRC
eNOS Signaling	0.00040738	0.157	25	AKT1, AQP1, AQP7, BDKRB2, CALM1 (includes others), CASP3, CASP8, ESR1, ESR2, GUCY1A1, GUCY1B1, LPAR6, NOS3, PDPK1, PIK3R1, PIK3R3, PRKAA1, PRKAA2, PRKAB2, PRKACA, PRKCA, PRKCB, PRKCD, PRKCI, PRKCZ
Axonal Guidance Signaling	0.000416869	0.117	59	ABL1, ADAM10, ADAMDEC1, AKT1, ARHGEF11, ARHGEF12, ARPC3, CDC42, CDK5, CFL1, COPS5, CRK, CXCL12, EFNB2, EPHB3, EPHB6, ERBB2, FZD1, FZD5, GLIS2, GNA14, GNAI2, GNB1, GNB2, GNB5, GRB2, GSK3B, ITSN1, L1CAM, LIMK2, MAP2K1, MAPK1, MAPK3, MYL9, NCK2, NFATC1, NFATC2, PAK2, PDGFB, PIK3R1, PIK3R3, PLXNC1, PRKACA, PRKCA, PRKCB, PRKCD, PRKCI, PRKCZ, RAC1, RAP1B, RHOA, RND1, SEMA6A, TUBA1B, TUBB, TUBB3, TUBB4B…
Inhibition of ARE-Mediated mRNA Degradation Pathway	0.000489779	0.155	25	AGO1, AGO2, AKT1, CNOT4, DCP1A, DCP2, EXOSC10, MAPK1, MAPK14, MAPK3, POMC, PPP2R5C, PPP2R5E, PRKACA, PSMA5, PSMB1, PSMB9, PTPA, SFN, YWHAB, YWHAE, YWHAG, YWHAH, YWHAQ, YWHAZ
Natural Killer Cell Signaling	0.000501187	0.146	29	AKT1, CDC42, CFL1, GRB2, KLRC2, KLRC3, LIMK2, MAP2K1, MAP3K12, MAP3K14, MAP3K5, MAP3K8, MAPK1, MAPK14, MAPK3, MTOR, NFATC1, NFATC2, NFKB1, NFKB2, PAK2, PIK3R1, PIK3R3, RAC1, RAP1B, REL, RELA, SYK, TRAF6
DNA Double-Strand Break Repair by Homologous Recombination	0.000524807	0.429	6	ABL1, ATM, BRCA1, MRE11, NBN, RAD50
DNA Double-Strand Break Repair by Non-Homologous End Joining	0.000524807	0.429	6	ATM, MRE11, NBN, PRKDC, RAD50, XRCC6
Dopamine-DARPP32 Feedback in cAMP Signaling	0.000549541	0.149	27	ATF4, ATP2A3, CACNA1A, CALM1 (includes others), CDK5, CREB1, CREB3, CREBBP, CSNK1A1, GNAI2, GUCY1A1, GUCY1B1, KCNJ2, PPP1CA, PPP1CB, PPP1CC, PPP1R3A, PPP1R7, PPP2R5C, PPP2R5E, PRKACA, PRKCA, PRKCB, PRKCD, PRKCI, PRKCZ, PTPA
PCP pathway	0.00060256	0.217	13	DAAM1, FZD1, FZD5, JUN, JUNB, JUND, MAP2K4, MAPK8, MAPK9, RAC1, RHOA, ROR2, WNT5A
Sphingosine-1-phosphate Signaling	0.00060256	0.169	20	AKT1, ASAH1, CASP1, CASP10, CASP3, CASP4, CASP6, CASP7, CASP8, CDC42, GNAI2, MAPK1, MAPK3, PDGFB, PIK3R1, PIK3R3, RAC1, RHOA, RND1, SPHK1
PAK Signaling	0.00060256	0.169	20	CASP3, CDC42, CFL1, EPHB3, GRB2, LIMK2, MAP2K1, MAP2K4, MAPK1, MAPK3, MAPK8, MAPK9, MYL9, NCK2, PAK2, PDGFB, PIK3R1, PIK3R3, RAC1, RAP1B
Macropinocytosis Signaling	0.000630957	0.197	15	ABI1, ARF6, CDC42, PDGFB, PIK3R1, PIK3R3, PRKCA, PRKCB, PRKCD, PRKCI, PRKCZ, RAC1, RAP1B, RHOA, SRC
Clathrin-mediated Endocytosis Signaling	0.000660693	0.145	28	ACTA2, ACTB, AP1M2, AP2B1, AP3S1, APOE, ARF6, ARPC3, CDC42, CLTC, CSNK2A1, CSNK2B, CTTN, FGF11, FGF13, GRB2, HGS, MDM2, PDGFB, PIK3R1, PIK3R3, RAB11A, RAC1, SH3BP4, SRC, TSG101, UBC, UBD
Role of JAK1, JAK2 and TYK2 in Interferon Signaling	0.000707946	0.308	8	JAK1, NFKB1, NFKB2, REL, RELA, STAT1, STAT2, STAT3
Agranulocyte Adhesion and Diapedesis	0.000758578	0.14	30	ACTA2, ACTB, CCL13, CCL14, CCL15, CCL16, CCL2, CCL23, CCL26, CCL28, CCL3, CCL3L1, CCL4, CCL5, CCL7, CCL8, CCR1, CCR4, CCR9, CDH5, CXCL12, CXCL8, CXCR5, EZR, FN1, GNAI2, MSN, MYL9, RDX, SDC4
NER (Nucleotide Excision Repair, Enhanced Pathway)	0.000794328	0.175	18	COPS2, COPS5, COPS6, EP300, ERCC6, GPS1, H3-3A/H3-3B, H4-16, H4C1, H4C14, H4C9, HMGN1, PCNA, POLA2, POLD2, POLR2G, RBX1, UBE2I
Apelin Adipocyte Signaling Pathway	0.000794328	0.186	16	CLIC2, GNAI2, GPX8, GSTZ1, HIF1A, MAPK1, MAPK14, MAPK3, MAPK8, MAPK9, PPARGC1A, PRKAA1, PRKAA2, PRKAB2, PRKACA, RAC1
Xenobiotic Metabolism AHR Signaling Pathway	0.000912011	0.184	16	AHR, ARNT, CREBBP, EP300, GSTZ1, HDAC5, NCOA1, NCOA2, NFKB1, NFKB2, NQO1, REL, RELA, SUMO1, UGT1A1, UGT1A3
Apelin Muscle Signaling Pathway	0.001	0.229	11	AKT1, GNA14, GNAI2, GNB1, GNB2, GNB5, NOS3, PPARGC1A, PRKAA1, PRKAA2, PRKAB2
LXR/RXR Activation	0.00102329	0.163	20	APOE, CCL2, CCL7, CYP51A1, IRF3, LBP, MLXIPL, MYLIP, NCOR1, NFKB1, NFKB2, NR1H2, NR1H3, NR1H4, REL, RELA, RXRA, RXRB, SREBF1, UGT1A3
Regulation of eIF4 and p70S6K Signaling	0.00102329	0.145	26	AGO1, AGO2, AKT1, EIF4A3, EIF4EBP1, EIF4EBP2, GRB2, IRS1, MAP2K1, MAPK1, MAPK14, MAPK3, MTOR, PABPC1, PDPK1, PIK3R1, PIK3R3, PPP2R5C, PPP2R5E, PRKCZ, PTPA, RAP1B, RPS15, RPS24, RPS4Y1, RPS6KB1
Granulocyte Adhesion and Diapedesis	0.00104713	0.143	27	CCL13, CCL14, CCL15, CCL16, CCL2, CCL23, CCL26, CCL28, CCL3, CCL3L1, CCL4, CCL5, CCL7, CCL8, CCR1, CCR4, CCR9, CDH5, CXCL12, CXCL8, CXCR5, EZR, GNAI2, HRH4, MSN, RDX, SDC4
Unfolded protein response	0.00131826	0.178	16	ATF4, BCL2, CEBPA, CEBPB, CEBPD, DDIT3, DNAJB12, DNAJC9, ERN1, MAP3K5, MAPK8, PPARG, SREBF1, SREBF2, TRAF2, VCP
Interferon Signaling	0.00158489	0.25	9	BCL2, IFIT3, IRF1, JAK1, MX1, PIAS1, RELA, STAT1, STAT2
IL-4 Signaling	0.00165959	0.174	16	AKT1, GRB2, HMGA1, IRS1, JAK1, MTOR, NFATC1, NFATC2, NR3C1, NR3C2, PIK3R1, PIK3R3, RAP1B, RPS6KB1, RPS6KB2, STAT6
G-Protein Coupled Receptor Signaling	0.00165959	0.127	35	ADRB2, AKT1, APEX1, ATF4, CCR4, CHUK, CREB1, CREB3, CREBBP, GNA14, GNAI2, GRB2, IKBKB, LAMTOR3, MAP2K1, MAP3K8, MAPK1, MAPK3, NFKB1, NFKB2, NFKBIA, PDPK1, PIK3R1, PIK3R3, PRKACA, PRKCA, PRKCB, RAP1B, REL, RELA, RGS2, RPS6KA1, SRC, STAT3, TDP2
Neuropathic Pain Signaling In Dorsal Horn Neurons	0.00169824	0.168	17	CREB1, ELK1, FOS, KCNN2, KCNQ2, KCNQ3, MAPK1, MAPK3, PIK3R1, PIK3R3, PRKACA, PRKCA, PRKCB, PRKCD, PRKCI, PRKCZ, SRC
Antiproliferative Role of Somatostatin Receptor 2	0.00218776	0.182	14	CDKN1B, ELK1, GNB1, GNB2, GNB5, GUCY1A1, GUCY1B1, MAP2K1, MAPK1, MAPK3, PIK3R1, PIK3R3, RAP1B, SRC
Role of Hypercytokinemia/hyperchemokinemia in the Pathogenesis of Influenza	0.00229087	0.174	15	CASP1, CCL2, CCL3, CCL4, CCL5, CXCL8, IFIT3, IRF3, IRF7, JAK1, MX1, NFKB1, NFKB2, STAT1, STAT2
Maturity Onset Diabetes of Young (MODY) Signaling	0.00245471	0.179	14	ADIPOQ, APOE, APOL3, CACNA1A, CREBBP, EP300, FOXA2, GAPDH, HNF1A, HNF4A, NEUROD1, NFKB1, NFKB2, OGDH
Role of Wnt/GSK-3β Signaling in the Pathogenesis of Influenza	0.00245471	0.179	14	CSNK1A1, CTNNB1, FZD1, FZD5, GSK3B, HNF1A, LEF1, NCOA1, NCOA2, NCOA3, TCF3, TCF4, TCF7L2, WNT5A
LPS/IL-1 Mediated Inhibition of RXR Function	0.0025704	0.127	32	ACSBG2, APOE, CES2, CYP2C18, CYP2C8, ECSIT, GSTZ1, JUN, LBP, MAP2K4, MAPK8, MAPK9, MGMT, NCOA1, NR1H2, NR1H3, NR1H4, NR1I2, NR1I3, NR5A2, PPARA, PPARGC1A, RARA, RXRA, SLC10A1, SREBF1, SULT1A2, SULT1A3/SULT1A4, SULT1C4, SULT2A1, TRAF2, TRAF6
Semaphorin Signaling in Neurons	0.00269153	0.194	12	ARHGEF12, CDC42, CDK5, CFL1, CRMP1, LIMK2, MAPK1, MAPK3, PAK2, RAC1, RHOA, RND1
Actin Cytoskeleton Signaling	0.00323594	0.127	31	ABI2, ACTA2, ACTB, ACTN1, ARHGEF12, ARPC3, CDC42, CFL1, CRK, EZR, FGF11, FGF13, FLNA, FN1, GRB2, LBP, LIMK2, MAP2K1, MAPK1, MAPK3, MSN, MYL9, PAK2, PDGFB, PIK3R1, PIK3R3, PPP1CB, RAC1, RAP1B, RDX, RHOA
Dilated Cardiomyopathy Signaling Pathway	0.00363078	0.144	21	ACTA2, ACTB, AKT1, BAD, BAG3, BCL2, CACNA1A, DSC2, DSG2, GSK3B, KDM1A, LMNA, MAPK1, MAPK14, MAPK3, MTOR, MYL9, PRKACA, RYR2, TNNI1, TNNI2
Calcium Signaling	0.00363078	0.13	28	ACTA2, ATF4, ATP2A3, CACNA1A, CALM1 (includes others), CREB1, CREB3, CREBBP, EP300, HDAC1, HDAC3, HDAC5, HDAC6, MAPK1, MAPK3, MEF2A, MEF2C, MEF2D, MYL9, NFATC1, NFATC2, PRKACA, RAP1B, RYR2, TNNI1, TNNI2, TP63, TRPC5
Circadian Rhythm Signaling	0.00363078	0.242	8	ARNTL, ATF4, BHLHE40, CLOCK, CREB1, CREB3, CREBBP, VIP
Necroptosis Signaling Pathway	0.00398107	0.14	22	BIRC2, BIRC3, CASP1, CASP10, CASP8, CHUK, GLUL, IKBKB, IRF3, JAK1, MDM2, PLA2G12B, PLA2G5, RB1, RIPK1, STAT1, STAT2, TNFRSF10B, TP53, TRAF2, TSPO, UBC
Role of JAK2 in Hormone-like Cytokine Signaling	0.00446684	0.235	8	EPO, IRS1, IRS2, JAK1, STAT1, STAT3, STAT5A, STAT5B
Pathogenesis of Multiple Sclerosis	0.00457088	0.444	4	CCL3, CCL4, CCL5, CCR1
Gαs Signaling	0.00489779	0.149	18	ADRB2, ATF4, CREB1, CREB3, CREBBP, ELK1, GNA14, GNAI2, GNB1, GNB2, GNB5, MAP2K1, MAPK1, MAPK3, PRKACA, RGS2, RYR2, SRC
RhoA Signaling	0.00645654	0.145	18	ACTA2, ACTB, ARHGAP8/PRR5-ARHGAP8, ARHGEF11, ARHGEF12, ARPC3, CFL1, DLC1, EZR, LIMK2, LPAR6, MSN, MYL9, NEDD4, PPP1CB, RDX, RHOA, SEPTIN1
Hepatic Fibrosis / Hepatic Stellate Cell Activation	0.00645654	0.129	25	A2M, ACTA2, BCL2, CCL2, CCL5, CD40, COL15A1, CXCL8, EGFR, FGFR1, FN1, LBP, LHX2, MYL9, NFKB1, NFKB2, PDGFB, REL, RELA, SMAD2, SMAD3, SMAD4, SMAD7, STAT1, TGFBR1
α-Adrenergic Signaling	0.00707946	0.151	16	CALM1 (includes others), GNA14, GNAI2, GNB1, GNB2, GNB5, MAP2K1, MAPK1, MAPK3, PRKACA, PRKCA, PRKCB, PRKCD, PRKCI, PRKCZ, RAP1B
Parkinson's Signaling	0.00776247	0.312	5	CASP3, CYCS, MAPK1, MAPK14, MAPK8
IL-17 Signaling	0.00794328	0.128	24	AKT1, CCL2, CEBPB, CXCL8, ELK1, FOS, GSK3B, JAK1, JUN, LCN2, MAP2K4, MAP3K14, MAPK1, MAPK14, MAPK3, MAPK8, MAPK9, NFKB1, PIK3R1, PIK3R3, RAP1B, RELA, TRAF2, TRAF6
FAK Signaling	0.00794328	0.145	17	ACTA2, ACTB, AKT1, CRK, EGFR, GRB2, MAP2K1, MAPK1, MAPK3, PAK2, PDPK1, PIK3R1, PIK3R3, PTEN, RAC1, RAP1B, SRC
Polyamine Regulation in Colon Cancer	0.00812831	0.177	11	CTNNB1, MAX, MXD1, MYC, PPARG, PSMA5, PSMB1, PSMB9, SAT1, TCF4, TCF7L2
GP6 Signaling Pathway	0.00812831	0.142	18	ADAM10, AKT1, APBB1IP, CALM1 (includes others), COL15A1, GRB2, GSK3B, PDPK1, PIK3R1, PIK3R3, PRKCA, PRKCB, PRKCD, PRKCI, PRKCZ, RAC1, RAP1B, SYK
Cardiomyocyte Differentiation via BMP Receptors	0.00851138	0.261	6	BMPR2, GATA4, MEF2C, SMAD1, SMAD4, SMAD5
Apelin Cardiac Fibroblast Signaling Pathway	0.00851138	0.261	6	AKT1, NOS3, PRKAA1, PRKAA2, PRKAB2, SPHK1
Basal Cell Carcinoma Signaling	0.00912011	0.167	12	CTNNB1, FZD1, FZD5, GLIS2, GSK3B, HNF1A, LEF1, TCF3, TCF4, TCF7L2, TP53, WNT5A
Tumoricidal Function of Hepatic Natural Killer Cells	0.0107152	0.25	6	CASP3, CASP6, CASP7, CASP8, CYCS, M6PR
Assembly of RNA Polymerase I Complex	0.0144544	0.333	4	POLR1C, TAF1B, TBP, UBTF
BER pathway	0.0144544	0.333	4	APEX1, FEN1, PCNA, POLB
Amyotrophic Lateral Sclerosis Signaling	0.0151356	0.139	16	BCL2, BCL2L1, BIRC2, BIRC3, CACNA1A, CASP1, CASP3, CASP7, CYCS, GLUL, NEFL, PIK3R1, PIK3R3, PRPH, RAC1, TP53
Protein Ubiquitination Pathway	0.0162181	0.113	31	ANAPC2, BIRC2, BIRC3, BRCA1, BTRC, CUL2, DNAJB12, DNAJB3, DNAJC22, DNAJC9, FBXW7, HSPB1, MDM2, NEDD4, PAN2, PSMA5, PSMB1, PSMB9, RBX1, SKP2, TRAF6, UBC, UBD, UBE2D1, UBE2I, UBE2T, UCHL5, USP1, USP16, USP19, USP36
SPINK1 General Cancer Pathway	0.0177828	0.159	11	AKT1, EGFR, JAK1, MAP2K1, MAPK1, MAPK3, PIK3R1, PIK3R3, RAP1B, SPINK1, STAT3
Retinoic acid Mediated Apoptosis Signaling	0.0177828	0.167	10	CASP3, CASP8, CYCS, IRF1, RARA, RARB, RARG, RXRA, RXRB, TNFRSF10B
Glioma Invasiveness Signaling	0.0263027	0.151	11	CDC42, MAPK1, MAPK3, PIK3R1, PIK3R3, PLAU, PLG, RAC1, RAP1B, RHOA, RND1
Leptin Signaling in Obesity	0.0288403	0.149	11	AKT1, FOXO1, GRB2, MAP2K1, MAPK1, MAPK3, PIK3R1, PIK3R3, POMC, PRKACA, STAT3
FcγRIIB Signaling in B Lymphocytes	0.0323594	0.141	12	AKT1, CACNA1A, CD79A, GRB2, MAP2K4, MAPK8, MAPK9, PDPK1, PIK3R1, PIK3R3, RAP1B, SYK
Differential Regulation of Cytokine Production in Intestinal Epithelial Cells by IL-17A and IL-17F	0.0371535	0.217	5	CCL2, CCL3, CCL4, CCL5, LCN2
Dopamine Receptor Signaling	0.0371535	0.143	11	PCBD1, PPP1CA, PPP1CB, PPP1CC, PPP1R3A, PPP1R7, PPP2R5C, PPP2R5E, PRKACA, PTPA, SLC18A1
CREB Signaling in Neurons	0.0389045	0.0947	57	ADRB2, AKT1, ATF4, BDKRB2, BMPR2, CACNA1A, CALM1 (includes others), CCR1, CCR4, CCR9, CREB1, CREB3, CREBBP, EGFR, ELK1, EP300, F2RL1, F2RL2, FGFR1, FGFR4, FZD1, FZD5, GNA14, GNAI2, GNB1, GNB2, GNB5, GPR15, GPR152, GPR158, GPR27, GPR45, GRB2, GTF2B, HRH4, LPAR6, MAP2K1, MAPK1, MAPK3, MCHR1, MTNR1A, PDGFB, PIK3R1, PIK3R3, POLR2G, PRKACA, PRKCA, PRKCB, PRKCD, PRKCI, PRKCZ, RAP1B, RPS6KA1, SHC3, SSTR…
Spliceosomal Cycle	0.0389045	0.163	8	BCAS2, CDC5L, CTNNBL1, CWC15, DDX39B, EIF4A3, PPIE, SNIP1
Granzyme B Signaling	0.040738	0.25	4	CASP3, CASP8, CYCS, PRKDC
Mismatch Repair in Eukaryotes	0.040738	0.25	4	FEN1, MLH1, MSH6, PCNA
Vitamin-C Transport	0.0436516	0.208	5	GJB2, LRRC8B, LRRC8D, TXN, TXNRD3
Cardiac β-adrenergic Signaling	0.0446684	0.115	20	AKAP9, APEX1, ATP2A3, CACNA1A, GNA14, GNAI2, GNB1, GNB2, GNB5, PPP1CA, PPP1CB, PPP1CC, PPP1R3A, PPP1R7, PPP2R5C, PPP2R5E, PRKACA, PTPA, RYR2, TDP2
GABA Receptor Signaling	0.0446684	0.122	16	AP2B1, CACNA1A, GABRB1, GAD2, GNA14, GNAI2, GNB1, GNB2, GNB5, KCNN2, KCNQ2, KCNQ3, SLC6A1, UBC, UBD, UBQLN1
Apelin Liver Signaling Pathway	0.0588844	0.192	5	GSK3B, IRS1, MAP2K4, MAPK8, MAPK9
Differential Regulation of Cytokine Production in Macrophages and T Helper Cells by IL-17A and IL-17F	0.060256	0.222	4	CCL2, CCL3, CCL4, CCL5
Coagulation System	0.0616595	0.171	6	A2M, BDKRB2, PLAT, PLAU, PLG, VWF
Mitochondrial Dysfunction	0.0630957	0.112	19	APH1A, APH1B, APP, BACE1, BCL2, CASP3, CASP8, CYB5R3, CYCS, MAP2K4, MAPK8, MAPK9, NCSTN, NDUFA9, NDUFB7, NDUFS8, OGDH, PSEN1, PSENEN
Purine Nucleotides De Novo Biosynthesis II	0.0645654	0.273	3	GART, IMPDH2, PAICS
Synaptic Long Term Depression	0.0676083	0.108	21	CACNA1A, GNA14, GNAI2, GUCY1A1, GUCY1B1, MAP2K1, MAPK1, MAPK3, NOS3, PLA2G12B, PLA2G5, PPP2R5C, PPP2R5E, PRKCA, PRKCB, PRKCD, PRKCI, PRKCZ, PTPA, RAP1B, RYR2
Creatine-phosphate Biosynthesis	0.0724436	0.4	2	CKB, CKMT1A/CKMT1B
2-ketoglutarate Dehydrogenase Complex	0.0724436	0.4	2	DLST, OGDH
Neuroprotective Role of THOP1 in Alzheimer's Disease	0.074131	0.119	14	APP, C1R, CREB1, HTRA1, MAPT, PDYN, PLG, PRKACA, PRSS50, PRSS8, SRY, ST14, TMPRSS15, YWHAE
Mitotic Roles of Polo-Like Kinase	0.0758578	0.136	9	ANAPC2, CCNB1, CDC25A, CDK1, PLK1, PLK2, PPP2R5C, PPP2R5E, PTPA
Aldosterone Signaling in Epithelial Cells	0.0794328	0.11	18	DNAJB12, DNAJB3, DNAJC22, DNAJC9, HSPB1, MAP2K1, MAPK1, MAPK3, NEDD4, NR3C2, PDPK1, PIK3R1, PIK3R3, PRKCA, PRKCB, PRKCD, PRKCI, PRKCZ
nNOS Signaling in Neurons	0.0794328	0.149	7	CALM1 (includes others), DLG4, PRKCA, PRKCB, PRKCD, PRKCI, PRKCZ
Ephrin A Signaling	0.0794328	0.149	7	ADAM10, CDC42, CFL1, PIK3R1, PIK3R3, RAC1, RHOA
Inflammasome pathway	0.0812831	0.2	4	CASP1, CASP8, NFKB1, NFKB2
Sonic Hedgehog Signaling	0.0851138	0.172	5	CCNB1, CDK1, GLIS2, GSK3B, PRKACA
Melatonin Degradation I	0.111944	0.131	8	CYP2C18, CYP2C8, CYP51A1, SULT1A2, SULT1A3/SULT1A4, SULT1C4, UGT1A1, UGT1A3
Glutamine Biosynthesis I	0.111944	1	1	GLUL
Sulfite Oxidation IV	0.111944	1	1	SUOX
UDP-N-acetyl-D-galactosamine Biosynthesis I	0.111944	1	1	GALE
Thioredoxin Pathway	0.133045	0.286	2	TXN, TXNRD3
Caveolar-mediated Endocytosis Signaling	0.140929	0.12	9	ABL1, ACTA2, ACTB, EGFR, FLNA, FLNB, ITSN1, PRKCA, SRC
G Protein Signaling Mediated by Tubby	0.146893	0.136	6	ABL1, GNA14, GNAI2, GNB1, GNB2, GNB5
Superpathway of Melatonin Degradation	0.157036	0.121	8	CYP2C18, CYP2C8, CYP51A1, SULT1A2, SULT1A3/SULT1A4, SULT1C4, UGT1A1, UGT1A3
Coronavirus Replication Pathway	0.158855	0.133	6	BAG3, GSK3B, TUBA1B, TUBB, TUBB3, TUBB4B
Superoxide Radicals Degradation	0.165959	0.25	2	CYGB, NQO1
RAN Signaling	0.18197	0.176	3	KPNA2, RAN, RANGAP1
Glutaryl-CoA Degradation	0.18197	0.176	3	GCDH, HADHA, HSD17B4
Phagosome Formation	0.184077	0.101	15	CDC42, FN1, MARCO, PIK3R1, PIK3R3, PRKCA, PRKCB, PRKCD, PRKCI, PRKCZ, RAC1, RHOA, RND1, SYK, TLR8
Gαi Signaling	0.190108	0.101	14	CCR4, GNA14, GNAI2, GNB1, GNB2, GNB5, GRB2, MAPK1, MAPK3, PRKACA, RAP1B, SHC3, SRC, STAT3
nNOS Signaling in Skeletal Muscle Cells	0.196789	0.125	6	CACNA1A, CALM1 (includes others), DAG1, RYR2, SNTA1, SNTB1
Regulation of Actin-based Motility by Rho	0.200909	0.103	12	ACTA2, ACTB, ARHGDIA, ARPC3, CDC42, CFL1, MYL9, PAK2, PPP1CB, RAC1, RHOA, RND1
S-methyl-5-thio-α-D-ribose 1-phosphate Degradation	0.206063	0.5	1	APIP
Flavin Biosynthesis IV (Mammalian)	0.206063	0.5	1	FLAD1
Uridine-5'-phosphate Biosynthesis	0.206063	0.5	1	UMPS
Glutamate Dependent Acid Resistance	0.206063	0.5	1	GAD2
Netrin Signaling	0.217771	0.111	8	CACNA1A, NCK2, NFATC1, NFATC2, PRKACA, RAC1, RYR2, UNC5B
Thyroid Hormone Metabolism II (via Conjugation and/or Degradation)	0.217771	0.128	5	SULT1A2, SULT1A3/SULT1A4, SULT1C4, UGT1A1, UGT1A3
Ketolysis	0.233884	0.2	2	HADHA, OXCT1
Valine Degradation I	0.251768	0.15	3	HADHA, HIBCH, HSD17B4
Primary Immunodeficiency Signaling	0.283139	0.111	6	CD40, CD79A, CIITA, ICOS, IL7R, RFXAP
Diphthamide Biosynthesis	0.287078	0.333	1	EEF2
NADH Repair	0.287078	0.333	1	GAPDH
5-aminoimidazole Ribonucleotide Biosynthesis I	0.287078	0.333	1	GART
D-glucuronate Degradation I	0.287078	0.333	1	DCXR
Inosine-5'-phosphate Biosynthesis II	0.287078	0.333	1	PAICS
Hypusine Biosynthesis	0.287078	0.333	1	DHPS
Tyrosine Biosynthesis IV	0.287078	0.333	1	PCBD1
Glutamate Receptor Signaling	0.287078	0.106	7	CALM1 (includes others), DLG4, GLUL, GNB1, GNB2, GNB5, GRIP1
3-phosphoinositide Degradation	0.297852	0.0899	17	ACP6, CDC25A, DUSP23, MTMR14, NUDT14, PPP1CA, PPP1CB, PPP1CC, PPP1R3A, PPP1R7, PPP1R8, PPP2R5C, PPP2R5E, PTEN, PTPA, SET, WBP11
Cleavage and Polyadenylation of Pre-mRNA	0.299916	0.167	2	CSTF2, NUDT21
Hematopoiesis from Multipotent Stem Cells	0.299916	0.167	2	EPO, THPO
D-myo-inositol (1,4,5,6)-Tetrakisphosphate Biosynthesis	0.299916	0.0904	16	ACP6, CDC25A, DUSP23, NUDT14, PPP1CA, PPP1CB, PPP1CC, PPP1R3A, PPP1R7, PPP1R8, PPP2R5C, PPP2R5E, PTEN, PTPA, SET, WBP11
D-myo-inositol (3,4,5,6)-tetrakisphosphate Biosynthesis	0.299916	0.0904	16	ACP6, CDC25A, DUSP23, NUDT14, PPP1CA, PPP1CB, PPP1CC, PPP1R3A, PPP1R7, PPP1R8, PPP2R5C, PPP2R5E, PTEN, PTPA, SET, WBP11
Mineralocorticoid Biosynthesis	0.299916	0.167	2	CYP11B2, EBP
3-phosphoinositide Biosynthesis	0.306196	0.0887	18	ACP6, CDC25A, DUSP23, NUDT14, PIK3R1, PIK3R3, PPP1CA, PPP1CB, PPP1CC, PPP1R3A, PPP1R7, PPP1R8, PPP2R5C, PPP2R5E, PTEN, PTPA, SET, WBP11
cAMP-mediated signaling	0.311172	0.0873	20	ADRB2, AKAP9, APEX1, ATF4, CALM1 (includes others), CCR4, CREB1, CREB3, CREBBP, GNAI2, LAMTOR3, MAP2K1, MAPK1, MAPK3, PRKACA, RGS2, RPS6KA1, SRC, STAT3, TDP2
Systemic Lupus Erythematosus In T Cell Signaling Pathway	0.311172	0.081	50	AKT1, ATF4, BCL6, CASP1, CASP10, CASP3, CASP4, CASP6, CASP7, CASP8, CDC42, CREB1, CREB3, CREBBP, ESR1, EZR, FOS, FOXP3, GNAI2, GRB2, ICOS, IL23A, JUN, MAP2K1, MAP2K4, MAP2K5, MAPK1, MAPK3, MLST8, MSN, MTOR, NFATC2, NOS3, PIK3R1, PIK3R3, PPP2R5C, PPP2R5E, PTPA, RAC1, RAP1B, RDX, RHOA, RND1, RPS6KB1, RPS6KB2, RPTOR, SP1, STAT3, SYK, YES1
Atherosclerosis Signaling	0.322849	0.0923	12	APOE, CCL2, CD40, CXCL12, CXCL8, NFKB1, NFKB2, PDGFB, PLA2G12B, PLA2G5, REL, RELA
MSP-RON Signaling Pathway	0.331131	0.103	6	ACTA2, ACTB, CCL2, PIK3R1, PIK3R3, PRKCZ
Assembly of RNA Polymerase III Complex	0.331131	0.154	2	POLR3D, TBP
Cholesterol Biosynthesis I	0.331131	0.154	2	CYP51A1, EBP
Cholesterol Biosynthesis II (via 24,25-dihydrolanosterol)	0.331131	0.154	2	CYP51A1, EBP
Cholesterol Biosynthesis III (via Desmosterol)	0.331131	0.154	2	CYP51A1, EBP
Glucocorticoid Biosynthesis	0.331131	0.154	2	CYP11B2, EBP
Tryptophan Degradation III (Eukaryotic)	0.341193	0.125	3	GCDH, HADHA, HSD17B4
Spermine and Spermidine Degradation I	0.349945	0.25	1	SAT1
Oxidized GTP and dGTP Detoxification	0.349945	0.25	1	RUVBL2
N-acetylglucosamine Degradation II	0.349945	0.25	1	NAGK
Phenylalanine Degradation I (Aerobic)	0.349945	0.25	1	PCBD1
SPINK1 Pancreatic Cancer Pathway	0.358922	0.1	6	F2RL1, SMAD2, SMAD3, SPINK1, TGFBR1, TMPRSS15
Endocannabinoid Neuronal Synapse Pathway	0.359749	0.0884	13	CACNA1A, DNAH1, GNA14, GNAI2, GNB1, GNB2, GNB5, MAPK1, MAPK14, MAPK3, MAPK8, MAPK9, PRKACA
Bupropion Degradation	0.36141	0.12	3	CYP2C18, CYP2C8, CYP51A1
Glutathione Redox Reactions I	0.36141	0.12	3	CLIC2, GPX8, GSTZ1
GPCR-Mediated Integration of Enteroendocrine Signaling Exemplified by an L Cell	0.368978	0.0959	7	ADRB2, CALCA, GNA14, GNAI2, PRKACA, SSTR5, VIP
Cellular Effects of Sildenafil (Viagra)	0.376704	0.0872	13	ACTA2, ACTB, CACNA1A, CALM1 (includes others), GUCY1A1, GUCY1B1, KCNN2, KCNQ2, KCNQ3, MYL9, NOS3, PPP1CB, PRKACA
Assembly of RNA Polymerase II Complex	0.390841	0.1	5	GTF2A1, GTF2B, POLR2G, TAF5L, TBP
Superpathway of Citrulline Metabolism	0.392645	0.133	2	CPS1, NOS3
Tetrahydrofolate Salvage from 5,10-methenyltetrahydrofolate	0.403645	0.2	1	GART
CMP-N-acetylneuraminate Biosynthesis I (Eukaryotes)	0.403645	0.2	1	NAGK
Eumelanin Biosynthesis	0.403645	0.2	1	DCT
tRNA Charging	0.403645	0.103	4	QARS1, TARS1, TARS2, TARS3
Lysine Degradation II	0.403645	0.2	1	AADAT
Lysine Degradation V	0.403645	0.2	1	AADAT
Citrulline-Nitric Oxide Cycle	0.403645	0.2	1	NOS3
Galactose Degradation I (Leloir Pathway)	0.403645	0.2	1	GALE
Tyrosine Degradation I	0.403645	0.2	1	GSTZ1
Glutamate Degradation III (via 4-aminobutyrate)	0.403645	0.2	1	GAD2
Inhibition of Matrix Metalloproteases	0.403645	0.103	4	A2M, ADAM10, RECK, TFPI2
D-myo-inositol-5-phosphate Metabolism	0.416869	0.0829	16	ACP6, CDC25A, DUSP23, NUDT14, PPP1CA, PPP1CB, PPP1CC, PPP1R3A, PPP1R7, PPP1R8, PPP2R5C, PPP2R5E, PTEN, PTPA, SET, WBP11
Superpathway of Inositol Phosphate Compounds	0.422669	0.0815	19	ACP6, CDC25A, DUSP23, IP6K3, NUDT14, PIK3R1, PIK3R3, PPP1CA, PPP1CB, PPP1CC, PPP1R3A, PPP1R7, PPP1R8, PPP2R5C, PPP2R5E, PTEN, PTPA, SET, WBP11
Isoleucine Degradation I	0.448745	0.118	2	HADHA, HSD17B4
Superpathway of Cholesterol Biosynthesis	0.448745	0.103	3	CYP51A1, EBP, HADHA
Phototransduction Pathway	0.44978	0.0926	5	GNB1, GNB5, GUCY1A1, GUCY1B1, PRKACA
Actin Nucleation by ARP-WASP Complex	0.456037	0.086	8	ARPC3, CDC42, GRB2, NCK2, RAC1, RAP1B, RHOA, RND1
Urea Cycle	0.456037	0.167	1	CPS1
Pentose Phosphate Pathway (Non-oxidative Branch)	0.456037	0.167	1	RPIA
Glycine Cleavage Complex	0.456037	0.167	1	AMT
Selenocysteine Biosynthesis II (Archaea and Eukaryotes)	0.456037	0.167	1	SEPSECS
Zymosterol Biosynthesis	0.456037	0.167	1	CYP51A1
Dopamine Degradation	0.465586	0.1	3	SULT1A2, SULT1A3/SULT1A4, SULT1C4
Androgen Biosynthesis	0.470977	0.111	2	EBP, SRD5A2
γ-linolenate Biosynthesis II (Animals)	0.470977	0.111	2	ACSBG2, CYB5R3
Pregnenolone Biosynthesis	0.470977	0.111	2	CYP11A1, CYP27A1
Estrogen Biosynthesis	0.49204	0.0909	4	CYP2C18, CYP2C8, CYP51A1, HSD17B4
Airway Inflammation in Asthma	0.505825	0.0938	3	CCL2, CXCL8, IL23A
Nicotine Degradation III	0.505825	0.0862	5	CYP2C18, CYP2C8, CYP51A1, UGT1A1, UGT1A3
Acetyl-CoA Biosynthesis I (Pyruvate Dehydrogenase Complex)	0.505825	0.143	1	PDHB
Ceramide Degradation	0.505825	0.143	1	ASAH1
Acetone Degradation I (to Methylglyoxal)	0.505825	0.0938	3	CYP2C18, CYP2C8, CYP51A1
Dermatan Sulfate Biosynthesis (Late Stages)	0.526017	0.087	4	SULT1A2, SULT1A3/SULT1A4, SULT1C4, SULT2A1
Heparan Sulfate Biosynthesis (Late Stages)	0.533335	0.0822	6	CES2, SULT1A2, SULT1A3/SULT1A4, SULT1C4, SULT2A1, TARS2
Inositol Pyrophosphates Biosynthesis	0.549541	0.125	1	IP6K3
Fatty Acid β-oxidation I	0.549541	0.0882	3	ACSBG2, HADHA, HSD17B4
Chondroitin Sulfate Biosynthesis (Late Stages)	0.561048	0.0833	4	SULT1A2, SULT1A3/SULT1A4, SULT1C4, SULT2A1
GPCR-Mediated Nutrient Sensing in Enteroendocrine Cells	0.563638	0.0776	9	CACNA1A, GNA14, GNAI2, PRKACA, PRKCA, PRKCB, PRKCD, PRKCI, PRKCZ
Pyrimidine Deoxyribonucleotides De Novo Biosynthesis I	0.579429	0.0909	2	NME1, NME7
Methionine Degradation I (to Homocysteine)	0.579429	0.0909	2	MGMT, PRMT1
Crosstalk between Dendritic Cells and Natural Killer Cells	0.587489	0.0769	7	ACTA2, ACTB, CD40, NFKB1, NFKB2, REL, RELA
Sphingosine and Sphingosine-1-phosphate Metabolism	0.587489	0.111	1	ASAH1
Pyrimidine Ribonucleotides De Novo Biosynthesis	0.587489	0.0833	3	NME1, NME7, UMPS
Salvage Pathways of Pyrimidine Deoxyribonucleotides	0.587489	0.111	1	TK1
Superpathway of Methionine Degradation	0.603949	0.0811	3	MGMT, PRMT1, SUOX
Complement System	0.603949	0.0811	3	C1R, CFB, CFH
Embryonic Stem Cell Differentiation into Cardiac Lineages	0.618016	0.1	1	GATA4
Heparan Sulfate Biosynthesis	0.618016	0.075	6	CES2, SULT1A2, SULT1A3/SULT1A4, SULT1C4, SULT2A1, TARS2
Calcium Transport I	0.618016	0.1	1	ATP2A3
Pentose Phosphate Pathway	0.618016	0.1	1	RPIA
Nicotine Degradation II	0.618016	0.0758	5	CYP2C18, CYP2C8, CYP51A1, UGT1A1, UGT1A3
TCA Cycle II (Eukaryotic)	0.618016	0.0833	2	DLST, OGDH
Dolichyl-diphosphooligosaccharide Biosynthesis	0.618016	0.1	1	ALG8
Cysteine Biosynthesis III (mammalia)	0.618016	0.0833	2	MGMT, PRMT1
Antigen Presentation Pathway	0.63387	0.0769	3	CD74, CIITA, PSMB9
Serotonin Degradation	0.642688	0.0735	5	SULT1A2, SULT1A3/SULT1A4, SULT1C4, UGT1A1, UGT1A3
Ketogenesis	0.653131	0.0909	1	HADHA
Glycolysis I	0.660693	0.0769	2	FBP2, GAPDH
Gluconeogenesis I	0.660693	0.0769	2	FBP2, GAPDH
Acyl-CoA Hydrolysis	0.714496	0.0769	1	HNF4A
NAD Phosphorylation and Dephosphorylation	0.714496	0.0769	1	ACP6
Bile Acid Biosynthesis, Neutral Pathway	0.714496	0.0769	1	CYP27A1
UDP-N-acetyl-D-galactosamine Biosynthesis II	0.714496	0.0769	1	GALE
Role of NFAT in Regulation of the Immune Response	1	0.06	34	AKT1, CALM1 (includes others), CD79A, CHUK, CSNK1A1, FOS, GATA4, GNA14, GNAI2, GNB1, GNB2, GNB5, GRB2, GSK3B, IKBKB, JUN, KPNA2, MAP2K1, MAPK1, MAPK3, MEF2A, MEF2C, MEF2D, NFATC1, NFATC2, NFKB1, NFKB2, NFKBIA, PIK3R1, PIK3R3, RAP1B, REL, RELA, SYK
CCR5 Signaling in Macrophages	1	0.0461	22	CACNA1A, CALM1 (includes others), CCL3, CCL4, CCL5, FOS, GNA14, GNAI2, GNB1, GNB2, GNB5, JUN, MAP2K4, MAPK1, MAPK14, MAPK8, MAPK9, PRKCA, PRKCB, PRKCD, PRKCI, PRKCZ
Calcium-induced T Lymphocyte Apoptosis	1	0.0274	12	ATP2A3, CALM1 (includes others), EP300, HDAC1, MEF2D, NFATC2, NR4A1, PRKCA, PRKCB, PRKCD, PRKCI, PRKCZ
Cytotoxic T Lymphocyte-mediated Apoptosis of Target Cells	1	0.0149	6	BCL2, CASP3, CASP6, CASP7, CASP8, CYCS
Airway Pathology in Chronic Obstructive Pulmonary Disease	1	0.0593	7	CCL2, CXCL8, FGF11, FGF13, IL23A, LCN2, PAEP
CTLA4 Signaling in Cytotoxic T Lymphocytes	1	0.0241	11	AKT1, AP1M2, AP2B1, CLTC, GRB2, PIK3R1, PIK3R3, PPP2R5C, PPP2R5E, PTPA, SYK
T Helper Cell Differentiation	1	0.02	9	BCL6, CD40, CXCR5, FOXP3, ICOS, STAT1, STAT3, STAT6, TGFBR1
CD28 Signaling in T Helper Cells	1	0.0505	25	AKT1, ARPC3, CALM1 (includes others), CDC42, CHUK, FOS, GRB2, IKBKB, JUN, MAP2K1, MAP2K4, MAPK8, MAPK9, NFATC1, NFATC2, NFKB1, NFKB2, NFKBIA, PDPK1, PIK3R1, PIK3R3, RAC1, REL, RELA, SYK
Role of Cytokines in Mediating Communication between Immune Cells	1	0.037	2	CXCL8, IL23A
Dendritic Cell Maturation	1	0.0476	27	AKT1, ATF4, CD40, CHUK, CREB1, CREB3, CREBBP, DDR2, IKBKB, IL23A, MAP2K4, MAP3K14, MAPK1, MAPK14, MAPK3, MAPK8, MAPK9, NFKB1, NFKB2, NFKBIA, PIK3R1, PIK3R3, REL, RELA, STAT1, STAT2, TRAF6
iCOS-iCOSL Signaling in T Helper Cells	1	0.0412	20	AKT1, BAD, CALM1 (includes others), CD40, CHUK, GRB2, ICOS, IKBKB, NFATC1, NFATC2, NFKB1, NFKB2, NFKBIA, PDPK1, PIK3R1, PIK3R3, PTEN, RAC1, REL, RELA
Lipid Antigen Presentation by CD1	1	0.00508	2	AP2B1, ARF6
Type I Diabetes Mellitus Signaling	1	0.0534	26	BCL2, CASP3, CASP8, CHUK, CYCS, GAD2, IKBKB, IRF1, JAK1, MAP2K4, MAP3K14, MAP3K5, MAPK1, MAPK14, MAPK8, MAPK9, NFKB1, NFKB2, NFKBIA, PIAS1, REL, RELA, RIPK1, STAT1, TRAF2, TRAF6
Allograft Rejection Signaling	1	0.00217	1	CD40
Autoimmune Thyroid Disease Signaling	1	0.00232	1	CD40
Communication between Innate and Adaptive Immune Cells	1	0.0169	8	CCL15, CCL3, CCL4, CCL5, CD40, CD79A, CXCL8, TLR8
Systemic Lupus Erythematosus Signaling	1	0.0301	18	AKT1, BDKRB2, CD40, CD79A, FOS, GRB2, JUN, MAPK1, MAPK3, MTOR, NFATC1, NFATC2, PIK3R1, PIK3R3, PPIH, PRPF3, RAP1B, SNRPA
Cdc42 Signaling	1	0.0362	20	ARPC3, CDC42, CFL1, EXOC5, FOS, GSK3B, JUN, LIMK2, MAP2K4, MAPK1, MAPK14, MAPK8, MAPK9, MYL9, PAK2, PARD3, PPP1CB, PRKCI, PRKCZ, SRC
Phospholipase C Signaling	1	0.0706	46	ARHGEF11, ARHGEF12, ATF4, CALM1 (includes others), CD79A, CDC42, CREB1, CREB3, CREBBP, EP300, GNB1, GNB2, GNB5, GRB2, HDAC1, HDAC3, HDAC5, HDAC6, MAP2K1, MAPK1, MAPK3, MEF2A, MEF2C, MEF2D, MYL9, NFATC1, NFATC2, NFKB1, NFKB2, PLA2G12B, PLA2G5, PLD2, PPP1CB, PRKCA, PRKCB, PRKCD, PRKCI, PRKCZ, RAC1, RAP1B, REL, RELA, RHOA, RND1, SRC, SYK
Altered T Cell and B Cell Signaling in Rheumatoid Arthritis	1	0.0234	11	CD40, CD79A, CHUK, IL23A, MAP3K14, NFKB1, NFKB2, REL, RELA, SPP1, TLR8
B Cell Development	1	0.0698	3	CD40, CD79A, IL7R
Regulation of IL-2 Expression in Activated and Anergic T Lymphocytes	1	0.0564	26	CALM1 (includes others), CHUK, ELK1, FOS, GRB2, IKBKB, JUN, MAP2K1, MAP2K4, MAPK1, MAPK3, MAPK8, MAPK9, NFATC1, NFATC2, NFKB1, NFKB2, NFKBIA, RAC1, RAP1B, REL, RELA, SMAD2, SMAD3, SMAD4, TGFBR1
Nur77 Signaling in T Lymphocytes	1	0.0429	21	BCL2, CALM1 (includes others), CASP3, CYCS, EP300, ESRRA, HDAC1, MAP2K1, MAP2K5, MAPK1, MAPK3, MEF2D, NFATC1, NR4A1, PCNA, PRKCA, PRKCB, PRKCD, PRKCI, PRKCZ, RXRA
PKCθ Signaling in T Lymphocytes	1	0.0466	25	CACNA1A, CHUK, FOS, GRB2, IKBKB, JUN, MAP2K4, MAP3K12, MAP3K14, MAP3K5, MAP3K8, MAPK1, MAPK3, MAPK8, NFATC1, NFATC2, NFKB1, NFKB2, NFKBIA, PIK3R1, PIK3R3, RAC1, RAP1B, REL, RELA
Antiproliferative Role of TOB in T Cell Signaling	1	0.0297	12	CCNE1, CDK2, CDKN1B, MAPK1, PABPC1, RB1, RPS6KA1, SKP2, SMAD2, SMAD3, SMAD4, TGFBR1
OX40 Signaling Pathway	1	0.0263	12	BCL2, BCL2L1, JUN, MAP2K4, MAPK8, MAPK9, NFKB1, NFKB2, NFKBIA, REL, RELA, TRAF2
Role of IL-17A in Psoriasis	1	0.0714	1	CXCL8
Hematopoiesis from Pluripotent Stem Cells	1	0.00478	2	CXCL8, EPO
Fatty Acid Activation	1	0.0714	1	ACSBG2
Retinoate Biosynthesis I	1	0.0278	1	RDH5
Ubiquinol-10 Biosynthesis (Eukaryotic)	1	0.0435	1	CYP11A1
tRNA Splicing	1	0.0455	2	APEX1, TDP2
The Visual Cycle	1	0.05	1	RDH5
NAD Salvage Pathway II	1	0.037	1	ACP6
Triacylglycerol Degradation	1	0.0392	2	CES2, TARS2
Phospholipases	1	0.0455	3	PLA2G12B, PLA2G5, PLD2
Choline Biosynthesis III	1	0.0667	1	PLD2
Chondroitin Sulfate Biosynthesis	1	0.0714	4	SULT1A2, SULT1A3/SULT1A4, SULT1C4, SULT2A1
Dermatan Sulfate Biosynthesis	1	0.0678	4	SULT1A2, SULT1A3/SULT1A4, SULT1C4, SULT2A1
Glycogen Degradation III	1	0.0714	1	GAA
Glutathione-mediated Detoxification	1	0.0303	1	GSTZ1
Urate Biosynthesis/Inosine 5'-phosphate Degradation	1	0.0714	1	IMPDH2
Mevalonate Pathway I	1	0.0714	1	HADHA
Superpathway of D-myo-inositol (1,4,5)-trisphosphate Metabolism	1	0.0435	1	PTEN
Purine Nucleotides Degradation II (Aerobic)	1	0.0526	1	IMPDH2
Mitochondrial L-carnitine Shuttle Pathway	1	0.0556	1	ACSBG2
D-myo-inositol (1,3,4)-trisphosphate Biosynthesis	1	0.0556	1	PTEN
Retinol Biosynthesis	1	0.0227	1	CES2
Colanic Acid Building Blocks Biosynthesis	1	0.0714	1	GALE
Pyrimidine Ribonucleotides Interconversion	1	0.0588	2	NME1, NME7
Histidine Degradation VI	1	0.05	1	CYP11A1
Stearate Biosynthesis I (Animals)	1	0.0377	2	ACSBG2, HNF4A
Putrescine Degradation III	1	0.0476	1	SAT1
Oxidative Ethanol Degradation III	1	0.0364	2	CYP2C18, CYP2C8
Ethanol Degradation IV	1	0.0435	1	CYGB
Superpathway of Geranylgeranyldiphosphate Biosynthesis I (via Mevalonate)	1	0.0556	1	HADHA
Tec Kinase Signaling	1	0.0683	38	ACTA2, ACTB, CDC42, FOS, GNA14, GNAI2, GNB1, GNB2, GNB5, JAK1, MAP2K4, MAPK8, MAPK9, NFKB1, NFKB2, PAK2, PIK3R1, PIK3R3, PRKCA, PRKCB, PRKCD, PRKCI, PRKCZ, RAC1, REL, RELA, RHOA, RND1, SRC, STAT1, STAT2, STAT3, STAT5A, STAT5B, STAT6, TNFRSF10B, TXK, YES1
Oxidative Phosphorylation	1	0.0367	4	CYCS, NDUFA9, NDUFB7, NDUFS8
Nucleotide Excision Repair Pathway	1	0.0571	2	ERCC6, POLR2G
SAPK/JNK Signaling	1	0.0542	26	CDC42, CRK, ELK1, GNB1, GNB2, GNB5, GRB2, HNRNPK, IRS1, JUN, MAP2K4, MAP3K12, MAP3K5, MAP4K3, MAPK8, MAPK8IP2, MAPK9, NFATC1, PIK3R1, PIK3R3, RAC1, RAP1B, RIPK1, SH2D2A, TP53, TRAF2
Serotonin Receptor Signaling	1	0.0465	2	PCBD1, SLC18A1
NF-κB Signaling	1	0.0657	36	AKT1, ARAF, BMPR2, BTRC, CASP8, CD40, CHUK, CREBBP, CSNK2A1, CSNK2B, EGFR, EP300, FGFR1, FGFR4, GSK3B, HDAC1, IKBKB, MAP3K14, MAP3K8, MAPK8, NFKB1, NFKB2, NFKBIA, PIK3R1, PIK3R3, PRKACA, PRKCB, PRKCZ, RAP1B, RELA, RIPK1, TDP2, TGFBR1, TLR8, TRAF2, TRAF6
T Cell Receptor Signaling	1	0.0659	39	AKT1, CALM1 (includes others), CDKN1B, CHUK, CTNNB1, ELK1, FOS, FOXO3, GRB2, GSK3B, HNF1A, ICOS, IKBKB, JUN, LEF1, MAP2K1, MAP2K4, MAPK1, MAPK14, MAPK3, MAPK8, MLST8, MTOR, NFATC1, NFATC2, NFKB1, NFKB2, NFKBIA, PIK3R1, PIK3R3, RAC1, RAP1B, REL, RELA, RPTOR, SHC3, TCF3, TCF4, TCF7L2
Gustation Pathway	1	0.0539	9	APEX1, CACNA1A, GNB1, GNB2, GNB5, LPAR6, P2RX4, PRKACA, TDP2
Phagosome Maturation	1	0.0692	11	M6PR, PRDX2, RAC1, STX1B, TSG101, TUBA1B, TUBB, TUBB3, TUBB4B, VPS18, VPS37C
Th17 Activation Pathway	1	0.0346	16	AHR, FOXP3, HIF1A, IL23A, JAK1, MTOR, NFATC1, NFATC2, NFKB1, NFKB2, REL, RELA, RORA, RUNX1, STAT3, TRAF6
FAT10 Signaling Pathway	1	0.0714	4	PSMA5, PSMB1, PSMB9, UBD
T Cell Exhaustion Signaling Pathway	1	0.0551	30	ACVR2B, AKT1, BCL6, BMPR2, FOS, FOXO1, JAK1, JUN, MAP2K4, MAPK1, MAPK3, MAPK8, MAPK9, MTOR, NFATC1, NFATC2, PDCD1LG2, PIK3R1, PIK3R3, PPP2R5C, PPP2R5E, PRDM1, PTPA, RAP1B, SMAD2, SMAD3, STAT1, STAT2, STAT3, TGFBR1
Eicosanoid Signaling	1	0.0299	2	PLA2G12B, PLA2G5

## Sheet: Data File S4
Data File S4. List of all the Gene Ontology Biological Process terms significantly associated with the HLHS interactome
Gene Ontology ID	Gene Ontology term	P-value	Enrichment ratio	Number of genes in the HLHS interactome	Genes in the HLHS interactome
GO:0016569	covalent chromatin modification	0	2.40905	111	ATM, ATXN3, AURKA, BAZ2A, BCL6, BRCA1, BRMS1, CARM1, CBX8, CCNB1, CDK1, CDK2, CDK5, CHD3, CHEK1, CLOCK, CREBBP, CTBP1, CTNNB1, CUL4B, DNMT3B, EED, EP300, EZH2, GATA2, GTF2B, HDAC1, HDAC5, HDAC6, JDP2, KANSL1, KAT2A, KAT2B, KAT5, KDM1A, KDM2A, KMT2A, KMT2B, LEF1, LMNA, MAPK3, MBD3L1, MORF4L1, MUC1, MYB, NAP1L2, NCOA1, OTUB1, PAF1, PAGR1, PAXIP1, PHF1, PRKAA1, PRKAA2, PRKCA, PRKCD, PRMT1, PRMT6, RP…
GO:0048732	gland development	0	2.43395	104	ABL1, AKT1, AR, ARF6, AURKA, BCL2, BTRC, CCND1, CDC42, CDH1, CDKN1B, CEBPB, CREB1, CSNK2B, CTNNB1, CUL3, DAG1, EGFR, ESR1, EZH2, EZR, GATA2, HAMP, HAND2, HIF1A, HNF1A, HOXB9, JUN, LEF1, MAPK1, MAPK3, MGMT, MSN, NKX2-1, NKX3-1, NME1, NOTCH1, NOTCH4, NR5A1, PCNA, PGR, PML, POLB, PSEN1, PTEN, PTN, RARG, RELA, RXRA, SMAD2, SMAD3, SMAD4, SP3, SRC, STAT5A, STAT6, TGFBR1, THRA, THRB, UPF2, RPS6KA1, WNT5…
GO:1903706	regulation of hemopoiesis	0	2.6894	103	ABL1, ARNT, BAD, BCL6, CASP8, CDK6, CEBPB, CREB1, CREBBP, CTNNB1, DLL1, DTX1, EP300, ERBB2, FOS, FOXO3, GATA2, HDAC1, HIF1A, HMGB1, IKZF3, IL7R, IRF7, JUN, KAT2A, KAT2B, KMT2A, KMT2B, LEF1, LMO2, MAPK14, MITF, MYB, MYC, MYL9, NFATC2, NFKBIA, NME1, NOTCH1, NUDT21, PAF1, PRDM1, PRKCA, PRKCZ, PRMT1, PRMT6, RARG, RB1, RHOA, RIPK1, RNF41, RUNX1, RUNX3, SETD1A, STAT1, STAT3, SYK, TAL1, TCF12, TCF3, TRA…
GO:0048545	response to steroid hormone	0	3.29843	126	AR, ARNTL, BAD, BCL2, BRCA1, CALM1, CARM1, CASP3, CCND1, CLOCK, CTNNB1, DDX5, DNMT3B, DSG1, DSG2, EGFR, EIF4EBP1, EP300, ESR1, ESR2, ESRRG, FHL2, FOS, FOXO1, FOXO3, GJB2, GRIP1, HDAC1, HDAC6, HMGB1, HNF4G, KANK2, KAT5, LEF1, MDM2, MED4, NCOA1, NCOA2, NCOA6, NEDD4, NEFL, NKX3-1, NOTCH1, NR1H3, NR1I2, NR2F6, NR3C1, NR4A1, NR5A1, NR5A2, PAGR1, PCNA, PGR, PIAS1, PPARA, PPARD, PPARG, PTN, RAN, RARG, R…
GO:0030099	myeloid cell differentiation	0	2.78716	104	ABI1, ACTN1, APP, ARNT, BCL6, CASP3, CASP8, CDC42, CDK6, CEBPB, CREB1, CREBBP, CTNNB1, DLL1, EP300, F2RL1, FOS, FOXO3, GATA2, HDAC1, HIF1A, HMGB1, IRF7, JUN, JUNB, KAT2B, KLF1, KMT2A, KMT2B, LEF1, MAPK14, MITF, MYC, MYL9, NCOA6, NFKBIA, NME1, PAF1, PML, PPARG, PRKCA, PRMT1, PRMT6, PSEN1, RARG, RB1, RIPK1, RNF41, RUNX1, SETD1A, SIRT1, SP3, SRC, STAT1, STAT3, TAL1, THRA, TRAF6, ZBTB16, CCR1, KAT8, …
GO:0030522	intracellular receptor signaling pathway	0	3.6122	101	AHR, AR, ARNTL, BIRC2, BIRC3, BRCA1, CARM1, CASP8, CLOCK, CTBP2, CTNNB1, DDX5, EP300, ERBIN, ESR1, ESR2, ESRRG, EZH2, FHL2, GPS2, GRIP1, HDAC1, HDAC6, HNF4G, IRF3, IRF7, KANK2, KAT5, MED4, NCOA1, NCOA6, NEDD4, NFKBIA, NKX3-1, NR1H3, NR1I2, NR2F6, NR3C1, NR4A1, NR5A1, NR5A2, PAGR1, PGR, PIAS1, PML, PPARA, PPARD, PPARG, RAN, RARG, RB1, RELA, RHOA, RUNX1, RXRA, SIRT1, SKP2, SNW1, SRC, STAT3, THRA, T…
GO:0048511	rhythmic process	0	2.8032	77	AHR, ARNTL, ATF4, BHLHE40, BTRC, CASP3, CDK4, CDK5, CLOCK, CREB1, CREBBP, CRX, CSNK2A1, DDX5, EGFR, EP300, ESR1, EZH2, FOXO3, GSK3B, HDAC1, IMPDH2, JUN, KAT2B, KMT2A, MAGED1, MAPK9, MTNR1A, NCOA2, NKX2-1, NOS3, NPAS2, NR1H3, NR2F6, NR5A1, PCNA, PGR, PHLPP1, PML, PPARA, PPARG, PPP1CA, PPP1CB, PPP1CC, PRKAA1, PRKAA2, PTEN, PTN, RACK1, SGPL1, SIRT1, SP1, SRC, SUV39H1, TP53, ADIPOQ, ATF5, DBP, EGR1, …
GO:0034612	response to tumor necrosis factor	0	2.87311	71	ADAM10, AKT1, BIRC2, BIRC3, BRCA1, CASP3, CASP8, CCL15, CCL16, CCL5, CCL7, CCL8, ERBIN, F2RL1, FOXO3, GBP2, GPS2, HAMP, IKBKB, KAT2A, KRT18, MAP3K14, MAPK1, MAPK14, MAPK3, MYOG, NFKB1, NFKBIA, NKX3-1, RACK1, RELA, RIPK1, RPS6KB1, SIRT1, STAT1, SYK, TAX1BP1, TCL1A, TRAF2, ADIPOQ, CALCA, CASP1, CASP4, CCL14, CCL2, CCL23, CCL26, CCL3, CD40, CEBPA, CHUK, CIB1, CXCL8, KLF2, LCN2, MAP3K5, MYOD1, NOL3, …
GO:0045165	cell fate commitment	0	2.89619	71	AR, BCL2, CASP3, CEBPB, CTNNB1, DLL1, FOXA2, GAS1, GATA2, MITF, MYOG, NEUROD4, NKX2-1, NOTCH1, NOTCH3, NOTCH4, PAF1, PML, PPARG, PRDM1, PSEN1, RHOA, RUNX2, SMAD1, SMAD2, SMAD4, SPRY2, STAT3, STAT6, TAL1, TCF3, TCF7L2, TGFBR1, TLX3, WNT5A, ASCL1, DKK1, DMRT3, EPAS1, ETS2, FGF13, FGFR1, FOXP3, GATA6, HOXD10, KLF4, MCL1, MEF2C, MTOR, MYOD1, NEUROD1, NOTCH2, NR2F2, OLIG2, PAX6, PITX1, POU3F2, POU6F2,…
GO:0007050	cell cycle arrest	0	3.30105	78	ABL1, ATM, AURKA, BARD1, BRCA1, CARM1, CCNB1, CCND1, CDK1, CDK2, CDK4, CDK5, CDK6, CDKN1B, CDKN2C, CUL2, CUL3, E2F1, EP300, ERN1, GAS1, JMY, KAT2B, LAMTOR3, MDM2, MLXIPL, MUC1, MYC, MYOG, NKX3-1, NOTCH1, PCNA, PML, PPM1G, PRKAA1, PRKAA2, PRKAB2, PRKACA, PRMT1, PRNP, RASSF1, RB1, RHEB, SFN, SKIL, SMAD3, SOX4, TCF7L2, TGFBR1, TP53, TSG101, RPTOR, CDKN2A, CDKN2B, CDKN2D, CNOT4, CXCL8, DDIT3, GATA6, …
GO:0009755	hormone-mediated signaling pathway	0	3.68569	86	AR, ARNTL, BRCA1, CARM1, CLOCK, CSNK2B, CTNNB1, DDX5, EP300, ESR1, ESR2, ESRRG, FHL2, GRIP1, HDAC1, HDAC6, HNF4G, KANK2, KAT5, LEF1, MED4, NCOA1, NCOA6, NEDD4, NKX3-1, NR1H3, NR1I2, NR2F6, NR3C1, NR4A1, NR5A1, NR5A2, NUP62, PAGR1, PGR, PIAS1, PPARA, PPARD, PPARG, RAN, RARG, RB1, RHOA, RUNX1, RXRA, SIRT1, SKP2, SRC, THRA, THRB, UBE2I, ARID1A, BUD31, CALCOCO1, CCNE1, DDX17, ESRRA, FOXH1, HNF4A, LAT…
GO:0006352	DNA-templated transcription, initiation	0	3.5176	80	AR, ATF7IP, BAZ2A, CCND1, CDK4, CREB1, CREBBP, CTNNB1, ESR1, ESR2, ESRRG, GTF2A1, GTF2B, GTF2F2, HMGB1, HNF1A, HNF4G, JUN, KAT2B, MAPK3, MED4, MITF, NCOA6, NOTCH1, NOTCH3, NOTCH4, NR1H3, NR1I2, NR2F6, NR3C1, NR4A1, NR5A1, NR5A2, PAXIP1, PGR, PPARA, PPARD, PPARG, PTEN, RARG, RUNX2, RXRA, SMARCB1, SNW1, SUB1, TBP, TCF4, THRA, THRB, TP53, ESRRA, FOSL1, HNF4A, MAML1, MED10, NOTCH2, NR1H2, NR1H4, NR1I…
GO:0035690	cellular response to drug	7.25915e-15	2.53199	87	ABL1, ACTB, AHR, ATF4, BAD, BRCA1, CBX8, CCL7, CDH1, CDK1, CDK2, CDK4, CRK, CTNNB1, DNMT3B, ECT2, EGFR, EIF4EBP1, EZH2, FOXO1, FOXO3, GJB2, GNB1, HDAC6, JUP, KMT2A, LDOC1, MAPK1, MAPK3, MDM2, MYB, MYC, NCOA1, NDOR1, NFKB1, NKX3-1, NME1, NR3C1, PCNA, PDGFB, PRKAA1, PRKAA2, PRKCD, PRNP, PTEN, RACK1, RAP1B, RELA, RIPK1, RPS6KB1, RYR2, SIRT1, SRC, STAT6, TP53, TRAF2, TXN, VIM, FDX1, ADIPOQ, APEX1, AQ…
GO:0060537	muscle tissue development	1.34813e-14	2.46398	90	ARNTL, BCL2, BMPR2, CCNB1, CDK1, CDK5, COPS2, CREB1, CTNNB1, CXADR, DDX5, DLL1, DSG2, DSP, EP300, ERBB3, FHL2, FLNB, FOS, HAMP, IFT20, KAT2A, KLF5, LEF1, LMNA, MAPK14, MEF2A, MEF2D, MYOG, NOTCH1, PIN1, PKP2, PPARA, PRKAA1, PTEN, RB1, RGS2, RHOA, RPS6KB1, RXRA, RYR2, SMAD1, SMAD3, SMAD4, SVIL, TGFBR1, TSC1, WNT5A, ARID1A, DDX17, DDX39B, DKK1, EEF2, EFNB2, EGR1, FGFR1, FOXH1, GATA4, GATA6, HNRNPU, …
GO:0051090	regulation of DNA-binding transcription factor activity	5.03301e-14	2.36328	94	AKT1, APP, AR, BHLHE40, BRMS1, BTRC, CARM1, CLOCK, COPS5, CTNNB1, EP300, ERBIN, ESR1, ESR2, EZH2, FAF1, FLNA, FOS, FOXA2, HAND2, HDAC5, IKBKB, JMY, JUN, JUP, KDM1A, MAPK1, MAPK3, MDFI, MID2, NFKB1, NFKBIA, NKX3-1, NPM1, PPARG, PRKCI, PRKCZ, PRNP, PTEN, RB1, RELA, RIPK1, RNF41, RPS6KA5, SIRT1, SMAD3, SMARCB1, STAT3, SUMO1, SYK, TAX1BP1, TCF3, TCF7L2, TP53BP1, TRAF2, TRAF6, TRIM27, TRIM37, UBC, UBE…
GO:0006979	response to oxidative stress	5.89806e-14	2.30949	98	ABL1, AKT1, APOE, APP, ARNT, ARNTL, ATF4, ATP13A2, BAD, BCL2, CASP3, CBX8, CDK1, CDK2, CRK, CTNNB1, CYCS, ECT2, EGFR, ERO1A, EZH2, FOS, FOXO1, FOXO3, GJB2, HBA1, HDAC6, HIF1A, HSPB1, JUN, KRT1, MAPK1, MAPK3, MAPK9, MAPT, MDM2, MGMT, MYB, NOS3, OXSR1, PCNA, PML, PRDX2, PRKAA1, PRKAA2, PRKCD, PRNP, PSEN1, RACK1, RBPMS, RELA, RIPK1, SELENOS, SIRT1, SP1, SRC, STAT1, STAT6, TP53, TRAF2, TSC1, TXN, UBQ…
GO:0042326	negative regulation of phosphorylation	1.22125e-13	2.30515	96	ABL1, AKT1, APOE, CALM1, CASP3, CCNB1, CDKN1B, CDKN2C, DACT1, DAG1, EZR, F2RL1, FOXA2, FOXO1, GCKR, GMFB, GPS1, GPS2, HSPB1, JUN, KAT2B, MAPT, MLXIPL, MVP, MYC, MYOG, NF2, NPM1, NUP62, PDPK1, PIN1, PLK1, PPARA, PRKCD, PRKCZ, PRNP, PSEN1, PTEN, RACK1, RB1, RGS2, RHOA, SFN, SIRT1, SMAD4, SPRY2, STAT3, SYNJ2BP, TRIM27, TSG101, WNK1, YWHAG, RPTOR, ADIPOQ, BDKRB2, CDKN2A, CDKN2B, CDKN2D, CEBPA, CHORDC…
GO:0033044	regulation of chromosome organization	1.57282e-13	2.50068	81	ATM, ATR, BCL6, BRCA1, CCNB1, CDC6, CHEK1, CTBP1, CTNNB1, CUL3, DCP2, DNMT3B, EED, EXOSC10, GATA2, HDAC5, HMGA1, IK, JDP2, KAT2A, KDM1A, KMT2A, KMT2B, LMNA, MAPK1, MAPK3, MAPT, MCM2, MUC1, MYB, MYC, NAP1L2, NEK6, OTUB1, PAF1, PAXIP1, PHF1, PLK1, PML, POT1, PRMT6, RB1, RPS6KA5, RUVBL2, SETD1A, SETDB1, SIRT1, SMAD4, SMARCB1, SNW1, SRC, TADA2A, TAL1, TERF1, TERF2, TRIP13, UPF1, AUTS2, BECN1, CCT4, C…
GO:0044843	cell cycle G1/S phase transition	2.48339e-13	2.75516	67	ATM, AURKA, BCL2, CARM1, CCNB1, CCND1, CCND2, CDC6, CDK1, CDK2, CDK4, CDK6, CDKN1B, CDKN2C, CUL2, CUL3, CUL4B, DACT1, E2F1, EIF4EBP1, EP300, EZH2, KANK2, MAX, MCM2, MDM2, MUC1, MYC, ORC2, PAF1, PAGR1, PCNA, PIAS1, PML, POLA2, PRMT1, PTEN, RB1, RDX, RPS6KB1, SFN, SKP2, SOX4, TP53, RPTOR, APEX1, CCL2, CCNE1, CDKN2A, CDKN2B, CDKN2D, CDT1, CNOT4, FBXW7, KLF4, LATS2, MCM3, MCM4, MCM5, MDM4, ORC5, PLAG…
GO:0097193	intrinsic apoptotic signaling pathway	3.68488e-13	2.60163	73	ABL1, AKT1, ATF4, ATM, BAD, BAG6, BCL2, BCL2L1, BRCA1, CASP3, CEBPB, CREB3, CUL2, CUL3, CYCS, DDX5, E2F1, EP300, ERN1, ERO1A, HDAC1, HIF1A, HNRNPK, HSPB1, JMY, KDM1A, MDM2, MLH1, MUC1, NKX3-1, PML, POLB, PRKCD, RACK1, SELENOS, SFN, SIRT1, SKIL, SNW1, SRC, TNFRSF10B, TP53, TRAF2, UBQLN1, BCL3, BDKRB2, CASP4, CD74, CDKN2D, DDIT3, DYRK2, EPO, ERCC6, FBXW7, HERPUD1, ING2, MAP3K5, MCL1, MSH6, NBN, NCK…
GO:0018205	peptidyl-lysine modification	3.68488e-13	2.3982	85	ARNT, BAG6, BRCA1, CHEK1, CLOCK, CREBBP, CTBP1, CTNNB1, DHPS, DNMT3B, EED, EP300, EZH2, GATA2, GTF2B, HDAC5, HDAC6, KANSL1, KAT2A, KAT2B, KAT5, KMT2A, KMT2B, LEF1, LMNA, MAPK3, MDM2, MORF4L1, MUC1, MYB, NAP1L2, NCOA1, PAGR1, PAXIP1, PHF1, PIAS1, PML, PRKAA1, PRKAA2, PRMT6, RELA, RPS6KA5, RUVBL2, SETD1A, SETDB1, SIRT1, SMAD4, SMARCB1, SNW1, SOX4, SUMO1, SUMO2, SUV39H1, TADA2A, TRIM27, UBE2I, KAT8,…
GO:0045787	positive regulation of cell cycle	4.2895e-13	2.36274	87	ABL1, APP, ATM, AURKA, BRCA1, CARM1, CCNB1, CCND1, CCND2, CDC42, CDC6, CDK1, CDK2, CDK4, CDKN1B, CHEK1, CUL3, CUL4B, DYNLT3, E2F1, ECT2, EIF4EBP1, EP300, EZH2, MDM2, MLXIPL, MUC1, MYOG, NKX3-1, NPM1, NUP62, PAF1, PAGR1, PCNA, PDGFB, PKP4, PML, PRKACA, PRKCA, PRMT1, RAD23A, RB1, RDX, RHOA, RPS6KB1, SFN, SOX4, SRC, SRPK2, SVIL, TAL1, TP53, WIZ, RPTOR, WNT5A, APEX1, ASCL1, BECN1, CCNE1, CDT1, CITED2…
GO:0070997	neuron death	5.66214e-13	2.46895	79	ABL1, AKT1, AP2B1, APOE, APP, ATF4, ATM, ATP13A2, BACE1, BAD, BCL2, BCL2L1, CASP3, CASP8, CCL5, CDC42, CDK5, CEBPB, CREB1, CTNNB1, ELK1, ERBB3, FOS, FOXO3, GAPDH, GSK3B, HIF1A, ITSN1, JUN, MAPT, MAX, MYB, NEFL, PDPK1, PIN1, POLB, PPARA, PRKCI, PRNP, PSEN1, RACK1, RB1, REL, RHOA, SIRT1, SRPK2, STAMBP, STAT3, TFAP2A, THRB, TRAF2, TSC1, WNT5A, ASCL1, CCL2, CCL3, CITED1, DDIT3, DKK1, EFNB2, EGR1, EPO…
GO:0072331	signal transduction by p53 class mediator	7.07767e-13	2.84211	61	AKT1, ATM, ATR, AURKA, BAG6, BANP, BCL2, BRCA1, CARM1, CCNB1, CDK1, CDK2, CDKN1B, CHEK1, CSNK2A1, CSNK2B, DDX5, E2F1, EP300, FOXO3, HNRNPK, JMY, KAT5, KDM1A, MAPK14, MDM2, MUC1, PAXIP1, PCNA, PIN1, PML, PRMT1, PRMT6, RPL5, SFN, SIRT1, SNW1, SOX4, TBP, TP53, TPX2, BCL3, BDKRB2, CD74, CNOT4, DYRK2, ING2, ING4, ING5, MDM4, NBN, NUPR1, PLAGL1, PLK2, SNAI1, SPRED1, TP63, TP73, TWIST1, L3MBTL1, PDK2
GO:2001233	regulation of apoptotic signaling pathway	7.92699e-13	2.32161	88	AKT1, AR, BAD, BCL2, BCL2L1, BRCA1, CASP8, CREB3, CSNK2A1, CTNNB1, E2F1, FAF1, GSK3B, HDAC1, HIF1A, HNRNPK, HSPB1, KDM1A, LMNA, MAGED1, MAPK8IP2, MAPK9, MDM2, MUC1, NKX3-1, NOS3, PML, PPP1CA, PRKCD, PSEN1, PTEN, RACK1, RELA, RIPK1, RPS6KB1, SELENOS, SFN, SIRT1, SKIL, SMAD3, SRC, TCF7L2, TGFBR1, TNFRSF10B, TP53, TRAF2, UBQLN1, YWHAB, YWHAG, YWHAQ, YWHAZ, BDKRB2, CD74, CDKN2D, CTNNA1, CTTN, DDIT3, …
GO:0061614	pri-miRNA transcription by RNA polymerase II	8.23914e-13	5.64281	25	DDX5, FOS, GATA2, HIF1A, JUN, KLF5, PDGFB, PPARA, PPARD, PPARG, RELA, SMAD1, SMAD3, SMAD4, SREBF2, STAT3, TP53, YY1, ETS1, FOSL1, KLF4, SOX9, SRF, TEAD1, GNL3
GO:0051098	regulation of binding	9.29709e-13	2.35245	85	ABL1, ACTB, ADRB2, AKT1, APOE, APP, AURKA, BCL2, CALM1, CARM1, CDK5, CRK, CRMP1, CSNK1A1, CSNK2B, CTBP2, CTNNB1, DACT1, DISC1, E2F1, EIF4A3, EP300, GOLGA2, GSK3B, GTF2B, HAND2, HDAC5, HMGB1, JUN, KDM1A, LDOC1, LEF1, MAPK3, MDFI, NFKBIA, NKX3-1, NME1, PCBD1, PDGFB, PIN1, PLK1, PPARA, PPARG, PPP1CA, PRKACA, PRKCD, PSEN1, RAN, RB1, RUVBL2, SMAD2, SMAD3, SMAD4, SRC, SUMO1, TCF7L2, TDG, TFIP11, TGFBR1…
GO:1901652	response to peptide	9.30208e-13	2.14821	103	ADRB2, AKT1, AP3S1, APP, BACE1, CACNA1A, CARD9, CDC5L, CDC6, CDK4, CDK5, CDKN1B, CREB1, CRK, CYP11A1, DAG1, EEF2K, EIF4EBP1, ERBIN, FOXO1, FOXO3, GJB2, GRB2, GSK3B, HDAC5, IRF5, IRS1, KAT2B, KLF1, KLF5, LDOC1, MAPK14, MAX, MDM2, NEFL, NFKB1, NFKBIA, NOTCH1, NR4A1, NR5A1, PDPK1, PPARA, PPARG, PRKAA1, PRKACA, PRKCD, PRKCI, PRKCZ, PRNP, PSEN1, PTEN, RANGAP1, RAP1B, RELA, RPS6KB1, SELENOS, SIRT1, SP1…
GO:0070555	response to interleukin-1	1.44482e-12	3.25026	48	BTRC, CCL15, CCL16, CCL5, CCL7, CCL8, CEBPB, GBP2, HIF1A, IKBKB, MAP3K8, MAPK3, NFKB1, NFKBIA, NKX3-1, OTUB1, PRKCA, PRKCI, RBX1, RELA, RPS6KA5, SRC, TNIP2, TRAF6, TRIM63, UBC, UPF1, YY1, CCL14, CCL2, CCL23, CCL26, CCL3, CD40, CHUK, CITED1, CXCL8, EGR1, EPO, ETS1, KLF2, LCN2, RORA, SOX9, ZC3H12A, CCL13, CHI3L1, GBP3
GO:1902532	negative regulation of intracellular signal transduction	2.60458e-12	2.11349	103	ABL1, AKT1, APLP1, APOE, ARNTL, ATM, BCL2, BCL2L1, BCL6, CALM1, CASP8, CREB3, CUL3, DACT1, DAG1, ERBIN, ESR1, EZR, F2RL1, FHL2, FOXO1, GPS1, GPS2, GSK3B, HDAC1, HGS, HIF1A, HSPB1, KDM1A, MDM2, MUC1, MYC, NF2, NUP62, PDZD3, PHLPP1, PIN1, PRKAA1, PRKAA2, PRKCD, PRNP, PTEN, RACK1, RELA, RGS2, RHOA, RIPK1, SELENOS, SIRT1, SMAD4, SPRY2, SRC, STAMBP, STAT1, SYNJ2BP, TLE1, TSC1, ADIPOQ, BCL3, BDKRB2, CD…
GO:0009636	response to toxic substance	4.31053e-12	2.09655	103	ABL1, ACTB, AHR, APOE, ATF4, BAD, BCL2, BCL2L1, BIRC2, CALM1, CASP3, CASP8, CBX8, CCL5, CCL7, CCNB1, CCND1, CDH1, CDK1, CDK4, CREB1, CRK, DNMT3B, ECT2, EPS8, EZH2, FOS, FOXO1, FOXO3, HAMP, HBA1, HDAC6, JUN, KDM1A, MAPK1, MAPK3, MBP, MDM2, MGMT, MYB, NEFL, NFKB1, NOS3, PCNA, PDGFB, PDZD3, POLB, PPARA, PRDX2, PRKAA1, PRKCD, PTEN, RACK1, RELA, RGS2, RHOA, RIPK1, RPS6KB1, SELENOS, SETDB1, SIRT1, SRC,…
GO:0044772	mitotic cell cycle phase transition	5.33774e-12	2.1065	101	AKAP9, APP, ATM, AURKA, BCL2, BRCA1, BTRC, CALM1, CARM1, CCNB1, CCND1, CCND2, CDC6, CDK1, CDK2, CDK4, CDK6, CDKN1B, CDKN2C, CHMP2A, CUL2, CUL3, CUL4B, DACT1, DCTN1, E2F1, EIF4EBP1, ENSA, EP300, EPS8, EZH2, FBXL12, IK, KANK2, MAX, MCM2, MDM2, MUC1, MYC, NDE1, NEK6, ORC2, PCNA, PIAS1, PLK1, PML, POLA2, PRKACA, PRMT1, PTEN, RB1, RBX1, RDX, RPS6KB1, SFN, SKP2, SOX4, TP53, TPX2, TRIP13, UBE2D1, YWHAG,…
GO:1901654	response to ketone	6.32272e-12	2.90202	54	AHR, AKT1, AR, BAD, BCL2L1, CALM1, CCND1, CDC5L, CDK4, CSNK2B, DNMT3B, DSG1, DSG2, EGFR, EIF4EBP1, ELK1, FOS, FOXO1, FOXO3, GJB2, GNB1, MSN, NCOA2, NDOR1, NEFL, NKX3-1, NME1, NR1H3, NR3C1, PCNA, PPARG, PRKAA1, PRKAA2, PTN, RELA, RPS6KB1, SIRT1, SPP1, SRC, SRD5A2, FDX1, AQP1, EPO, FOSB, FOSL1, GABRB1, KLF2, KLF4, PCK2, SREBF1, CPS1, MSTN, THBS1, TSPO
GO:0007568	aging	6.32272e-12	2.44708	73	ABL1, AKT1, APP, ARNTL, ATM, ATR, BCL2, BCL6, CARM1, CDK1, CDK6, CHEK1, CREB1, DAG1, ERO1A, FOS, FOXO3, GJB2, GRB2, HAMP, HMGA1, JUN, LMNA, MAPK14, NEK6, NPM1, NR5A1, NUP62, PML, POLB, PRKCD, PRMT6, PRNP, PSEN1, PTEN, RELA, RPS6KB1, SIRT1, STAT3, TERF2, TP53, APEX1, BECN1, CALCA, CDKN2A, CDKN2B, CTNNA1, DKK1, EEF2, EPO, ING2, JUND, KRT16, KRT25, MAP2K1, MSH6, MTOR, NFKB2, PAX5, PDCD4, PLK2, PPARG…
GO:0042770	signal transduction in response to DNA damage	9.31017e-12	3.334	43	ABL1, ATM, ATR, AURKA, BRCA1, CARM1, CCNB1, CDC5L, CDK1, CDK2, CDKN1B, CHEK1, DDX5, E2F1, EP300, FOXO3, GRB2, KAT5, KDM1A, MAPK14, MDM2, MUC1, PAXIP1, PCNA, PLK1, PML, PRMT1, SFN, SIRT1, SOX4, TP53, BCL3, CD74, CNOT4, ING4, MDM4, NBN, PLAGL1, PLK2, PRKDC, SNAI1, SPRED1, TWIST1
GO:0050673	epithelial cell proliferation	1.24357e-11	2.26623	83	AKT1, APOE, AR, ARNT, BAD, BMPR2, BTRC, CCL5, CCND1, CDK6, CDKN1B, CEBPB, CTNNB1, EGFR, ERBB2, ERN1, ESR1, GATA2, GLUL, HIF1A, HMGB1, HMGN1, HTRA1, JUN, MAGED1, MAPK1, MYC, NKX3-1, NME1, NOTCH1, NR4A1, PDGFB, PDPK1, PGR, PPARD, PPARG, PRKCA, PSEN1, PTEN, PTN, RB1, RUNX3, SFN, SIRT1, SMAD3, SP1, STAT1, STAT3, STAT5A, STAT6, SYNJ2BP, TGFBR1, THAP1, RPS6KA1, RPTOR, WNT5A, CCL2, CCL26, CDKN2B, EFNB2,…
GO:0035270	endocrine system development	1.6762e-11	3.33279	42	AKT1, ARNTL, BAD, CDH1, CDK6, CLOCK, CREB1, DLL1, FOXA2, FOXO1, GATA2, GSK3B, MAPK1, MAPK3, NKX2-1, NR5A1, PDPK1, RHEB, SMAD2, SMAD3, SOX4, TGFBR1, THRA, THRB, WNT5A, ASCL1, CITED2, ETS1, GATA6, HNF4A, HOXB3, MAP2K1, NEUROD1, PAX6, PAX8, PITX1, POU3F2, SOX9, SRF, GSX1, PROP1, TSPO
GO:0046677	response to antibiotic	1.7801e-11	2.37855	74	ABL1, AHR, BAD, BCL2, BCL2L1, BIRC2, CASP3, CASP8, CBX8, CCL7, CCND1, CDK1, CDKN1B, CIITA, CRK, ECT2, EPS8, EZH2, FOXO1, FOXO3, GJB2, HAMP, HBA1, HDAC6, JAK1, JUN, KDM1A, MDM2, MGMT, MYB, NEFL, PCNA, PDGFB, POLB, PRKAA1, PRKCD, PTEN, RACK1, RELA, RGS2, RHOA, RIPK1, RPS6KB1, SETDB1, SIRT1, SRC, STAT1, STAT3, STAT6, TP53, TXN, FDX1, ADIPOQ, APEX1, AQP1, BECN1, CCR4, CHUK, EEF2, EGR1, ETS1, FOSL1, K…
GO:0040029	regulation of gene expression, epigenetic	4.1745e-11	2.51958	64	ACTB, AGO2, BAZ2A, BRCA1, CHEK1, CTNNB1, DDX5, DNMT3B, EED, EGFR, EP300, ESR1, EXOSC10, EZH2, HDAC1, HDAC5, HDAC6, HMGA1, HMGB1, KAT2A, KAT2B, KMT2B, LRIF1, MBD3L1, MORF4L1, NOTCH4, PHF1, PPARG, PPP1R8, RAN, RBM15B, SETDB1, SIRT1, SMAD1, SMAD2, SMAD3, SNIP1, STAT3, SUV39H1, TBP, TDG, TP53, TRIM27, UPF1, AGO1, ARID1A, ARID4B, CREBZF, DEK, ERCC6, HNRNPU, KLF2, LHX2, MAP2K1, MSL3, NCOR1, POLR1C, POL…
GO:0033002	muscle cell proliferation	5.55456e-11	2.84621	51	AKT1, CCL5, CCNB1, CDK1, CDKN1B, CTNNB1, CXADR, EGFR, ERN1, HBEGF, JUN, MAPK14, MDM2, MEF2D, MYB, MYOG, NOTCH1, NOTCH3, PDGFB, PPARD, PPARG, PTEN, RPS6KB1, RXRA, SKP2, SMAD1, STAT1, STAT3, TCF7L2, TGFBR1, TRAF6, XRCC6, ADIPOQ, DDX39B, FGFR1, GATA6, KLF4, MAP3K5, MEF2C, MTOR, NR4A3, PDCD4, PPARGC1A, PRKDC, SAV1, TP73, VIP, ZFPM2, GNAI2, MSTN, THBS1
GO:0070482	response to oxygen levels	6.08335e-11	2.29061	76	AKT1, ARNT, ATF4, ATM, BAD, BCL2, BIRC2, CASP3, CCNB1, CDK4, CDKN1B, CHCHD2, CREB1, CREBBP, CUL2, DNMT3B, E2F1, EEF2K, EP300, ERO1A, FOXO1, FOXO3, GNB1, HIF1A, LMNA, MDM2, MYB, MYC, NKX3-1, NOTCH1, PLAT, PLAU, PML, POLB, PPARA, PPARD, PPARG, PRKAA1, PTEN, PTN, RBX1, RHOA, RYR2, SIRT1, SMAD3, SMAD4, SRC, SUV39H1, TP53, TSC1, UBC, UBQLN1, CYGB, ADIPOQ, AQP1, BECN1, CITED2, EGR1, EPAS1, EPO, ETS1, G…
GO:0002009	morphogenesis of an epithelium	6.21936e-11	2.05257	97	ABL1, AP2B1, AR, BCL2, BTRC, CDC42, CLTC, CSNK2B, CTNNB1, DAAM1, DACT1, DAG1, DLL1, EGFR, ESR1, EXOC5, EZR, FLNA, GRB2, HAND2, HBEGF, HIF1A, IFT20, KAT2A, KRT6A, LEF1, MAGED1, MSN, MYC, NKX2-1, NKX3-1, NOTCH1, NOTCH4, PGR, PML, PPP1CA, PRKACA, PSEN1, PTEN, RAC1, RARG, RHOA, RXRA, RYR2, SMAD3, SMAD4, SOX4, SPRY2, SRC, ST14, STAT1, SYNE4, TFAP2A, TRAF6, TSC1, WNT5A, ALX1, ARID1A, CFL1, CITED1, DKK1…
GO:1901987	regulation of cell cycle phase transition	8.3488e-11	2.18403	83	AKAP9, APP, ATM, AURKA, BCL2, BRCA1, BTRC, CARM1, CCNB1, CCND1, CCND2, CDC6, CDK1, CDK2, CDK4, CDKN1B, CHEK1, CUL3, CUL4B, DACT1, DCTN1, E2F1, EP300, EZH2, IK, KANK2, MDM2, MUC1, NDE1, NEK6, NPM1, PAF1, PAGR1, PAXIP1, PCNA, PLK1, PML, PRKACA, PRMT1, PTEN, RB1, RBX1, RDX, SFN, SOX4, TP53, TPX2, TRIP13, UBE2D1, YWHAG, CEP192, RPTOR, APEX1, ATF5, CCL2, CCNE1, CDKN2B, CDKN2D, CDT1, CEP72, CNOT4, FBXW…
GO:0007517	muscle organ development	9.07701e-11	2.19179	82	ARNTL, BCL2, CCNB1, CDK1, CDK5, COPS2, CREB1, CTNNB1, CXADR, DDX5, DLL1, DSP, EID2, EP300, ERBB3, ETV1, FLNB, FOS, HAMP, HBEGF, KAT2A, KLF5, LEF1, MAPK14, MEF2A, MEF2D, MKX, MYOG, NOTCH1, PIN1, PKP2, PPARA, PRKAA1, PTEN, RB1, RGS2, RHOA, RPS6KB1, RXRA, RYR2, SIRT1, SMAD3, SMAD4, SVIL, TCF12, TGFBR1, WNT5A, CTF1, DDX17, DDX39B, DKK1, EEF2, EFNB2, EGR1, EID2B, FGFR1, FOXH1, FZD1, GATA6, HOXD10, LUC…
GO:0061458	reproductive system development	9.28591e-11	2.1121	89	AKT1, AR, ARNT, BCL2, BCL2L1, BIRC2, BMPR2, CASP3, CASP8, CCND1, CDKN1B, CEBPB, CTNNB1, EGFR, ESR1, FLNA, FOXO3, GATA2, GJB2, GRB2, HIF1A, HTRA1, JUNB, KMT2B, KRT19, LDOC1, LEF1, MAPK1, MAPK14, MDFI, NCOA1, NKX2-1, NKX3-1, NOS3, NOTCH1, NR5A1, PDGFB, PGR, PPARD, PPARG, PRDM1, PTEN, RARG, RXRA, SGPL1, SIRT1, SMAD4, SP3, SPP1, SRC, SRD5A2, ST14, TEX11, TGFBR1, WNT5A, ARID1A, ARID4B, CDX2, CEBPA, CI…
GO:0198738	cell-cell signaling by wnt	1.57933e-10	2.05349	93	ABL1, AGO2, AP2B1, APOE, APP, ARNTL, BTRC, CALM1, CCND1, CDC42, CLTC, CSNK1A1, CSNK2A1, CSNK2B, CTNNB1, CUL3, DAAM1, DACT1, DISC1, EGFR, ESR1, FOXO1, FOXO3, G3BP1, GNB1, GSK3B, HDAC1, IFT20, JUP, LEF1, MAPK14, MDFI, MITF, NFKB1, NOTCH1, PAF1, PIN1, PPP1CA, PRKAA1, PRKAA2, PSEN1, PTEN, RAC1, RACK1, RARG, RBX1, RECK, RHOA, RNF213, RUNX1, RUVBL2, RYR2, SMAD3, SOX4, SRC, TCF7L2, TLE1, UBC, VCP, WNK1,…
GO:0018209	peptidyl-serine modification	1.64828e-10	2.33113	70	AKAP9, AKT1, APP, ARAF, ATM, ATR, AURKA, BCL2, CCNB1, CDK1, CDK2, CDK5, CLK1, CSNK1A1, CSNK2A1, EGFR, ERN1, GSK3B, HDAC6, IKBKB, MAPK1, MAPK14, MAPK3, MAPK9, MAST1, MLXIPL, NEK6, PDGFB, PDPK1, PLK1, PRKAA1, PRKAA2, PRKACA, PRKCA, PRKCD, PRKCI, PRKCZ, RACK1, RIPK1, RPS6KA5, RPS6KB1, SPRY2, SRC, SYK, TCL1A, TGFBR1, TXN, WNK1, RPTOR, WNT5A, BDKRB2, CHUK, DKK1, EPO, ERCC6, LATS2, MAP3K12, MAPK8, MAST…
GO:0043543	protein acylation	2.57395e-10	2.51793	59	ARNTL, BAG6, BRCA1, CHEK1, CLOCK, CREBBP, CTBP1, DLST, EP300, FAM161A, FOXO1, GATA2, GLUL, GSK3B, GTF2B, HDAC5, KANSL1, KAT2A, KAT2B, KAT5, KMT2A, LEF1, MAPK3, MAPT, MORF4L1, MUC1, NAP1L2, NCOA1, PAXIP1, PRKAA1, PRKAA2, RPS6KA5, RUVBL2, SIRT1, SMAD4, SMARCB1, SOX4, TADA2A, ZDHHC17, KAT8, AUTS2, EID1, FOXP3, ING4, ING5, MSL3, MYOD1, NATD1, NCOA3, NUPR1, PPARGC1A, SELENOK, SET, TADA3, TAF5L, TWIST1…
GO:0018210	peptidyl-threonine modification	4.16392e-10	3.29659	37	AKT1, APP, BCL2, CALM1, CDK1, CDK5, CHEK1, CLK1, CSNK1A1, CSNK2A1, CSNK2B, GSK3B, MAPK1, OXSR1, PDPK1, PLK1, PRKACA, PRKCA, PRKCD, SPRY2, TGFBR1, TRPC5, WNK1, RPTOR, WNT5A, MAP2K1, MAP3K12, MAPK8, MTOR, PRKCB, SIRT2, SMAD7, SPHK1, SPRED1, TTK, CHI3L1, PARD3
GO:0051348	negative regulation of transferase activity	4.16392e-10	2.40562	63	ABL1, AKT1, APOE, CASP3, CDKN1B, CDKN2C, FOXA2, GCKR, GMFB, GPS1, GPS2, GSK3B, HSPB1, KAT2B, MAPT, MVP, NF2, NPM1, NUP62, PDPK1, PLK1, POT1, PPARG, PRKCD, PSEN1, RACK1, RB1, RGS2, RPL5, SFN, SIRT1, SPRY2, SRC, TERF1, TP53, TRIM27, TSG101, WNK1, YWHAG, RPTOR, ADIPOQ, CDKN2A, CDKN2B, CDKN2D, CEBPA, CHORDC1, CIB1, DEPTOR, DTNBP1, HNRNPU, INCA1, IRS2, LATS2, NR2F2, PAK2, PDCD4, SMAD7, SPRED1, TSC2, D…
GO:0002065	columnar/cuboidal epithelial cell differentiation	4.20446e-10	3.35463	36	ABL1, ARNTL, BAD, CDK6, CEBPB, CLOCK, DLL1, GSK3B, HIF1A, KLF5, LEF1, NOTCH1, PDPK1, PRDM1, RARG, RHEB, RXRA, SOX4, WNT5A, ASCL1, CDX2, FAM20C, FGFR1, GATA4, GATA5, GATA6, HNF4A, NEUROD1, PAX6, PDZD7, PROX1, RARA, RARB, SAV1, TP63, WHRN
GO:0031667	response to nutrient levels	4.20446e-10	1.99777	95	ADRB2, AKT1, APOE, ATF4, BCL2, BMPR2, CCND1, CREB1, DNMT3B, DSC2, EGFR, ENSA, FOXA2, FOXO1, FOXO3, GLUL, HAMP, JUN, KANK2, KAT2A, MAPK1, MAPK3, MAX, MDM2, MGMT, NCOA1, PCNA, PPARA, PPARD, PPARG, PRKAA1, PRKAA2, PTEN, PTN, RELA, RPS6KB1, SETDB1, SIRT1, SNW1, SPP1, SRC, SRD5A2, SREBF2, STAT1, TP53, TSC1, RPTOR, ADIPOQ, ASCL1, BECN1, CCL28, CD40, CDKN2B, CDKN2D, DDIT3, EEF2, EPO, GATA4, LCN2, MAP3K5…
GO:0009612	response to mechanical stimulus	6.93501e-10	2.6006	53	AKT1, BACE1, BAD, CASP8, CCNB1, CHEK1, DAG1, EGFR, ETV1, FOS, JUN, JUNB, JUP, MAP3K14, MAPK14, MAPK3, MAPK9, NFKB1, NFKBIA, PPARG, RAC1, RELA, RHOA, RPS6KB1, RYR2, SHANK3, SRC, STAT1, TNFRSF10B, ANKRD23, AQP1, BAG3, CASP1, CD40, ETS1, FOSB, FOSL1, GATA4, IRF1, JUND, MAP2K4, MAPK8, PDZD7, SCN1A, SOX9, WHRN, CHI3L1, CXCL12, IGFBP2, KCNA1, KCNJ2, THBS1, TLR8
GO:0002521	leukocyte differentiation	8.10982e-10	1.96588	96	ABL1, APP, ATM, BAD, BCL2, BCL6, CASP8, CDC42, CDK6, CEBPB, CREB1, CTNNB1, DLL1, DTX1, EP300, ERBB2, F2RL1, FOS, GATA2, GPS2, HDAC5, HMGB1, HNF1A, IKZF3, IL7R, IRF7, JUN, JUNB, KAT2A, LEF1, MAPK14, MITF, MYB, MYC, NFATC2, NME1, PPARG, PRDM1, PRKCA, PRKCZ, PSEN1, RB1, RHOA, RIPK1, RNF41, RUNX1, RUNX2, RUNX3, SIRT1, SOX4, SP3, SRC, STAT3, STAT6, SYK, TAL1, TCF3, TRAF6, TSC1, ZBTB16, ZEB1, CCR1, ADI…
GO:0071496	cellular response to external stimulus	8.66533e-10	2.21609	72	AKT1, ATF4, BAD, BCL2, BMPR2, CASP8, CHEK1, DAG1, DCTPP1, DSC2, EGFR, FOS, FOXA2, FOXO1, GLUL, JUN, KANK2, MAP3K14, MAPK1, MAPK3, MAX, MDM2, NCOA1, NFKB1, PPARG, PRKAA1, PRKAA2, PTN, RAC1, SIRT1, SKP2, SNW1, SREBF2, TNFRSF10B, TP53, TSC1, RPTOR, AQP1, BAG3, BECN1, CASP1, CD40, CDKN2B, FOSL1, IRF1, LCN2, MAP2K4, MAP3K5, MAPK8, MTOR, MYOD1, NR1H4, NR4A2, RRAGA, RRAGB, SOX9, SREBF1, SRF, USF2, VDR, …
GO:0050769	positive regulation of neurogenesis	8.66533e-10	2.02232	89	APOE, APP, ARF1, ARHGDIA, BCL2, BCL6, BMPR2, CDKL3, CRX, CTNNB1, DAG1, DISC1, DLG4, DNMT3B, E2F1, ECT2, EEF2K, EP300, EZH2, FLNA, FN1, GATA2, GFAP, GRIP1, HDAC1, HIF1A, ITSN2, KDM1A, L1CAM, MAPT, MYB, NAP1L1, NAP1L2, NCOA1, NEFL, NME1, NOTCH1, PPARG, PPP1CC, PRKCI, PSEN1, PTEN, PTN, RELA, RGS2, RHEB, RHOA, SHANK3, SKIL, SNW1, SS18L1, STMN2, SYT17, TCF12, TCF3, TCF4, TRPC5, ZEB1, WNT5A, ASCL1, DAB…
GO:0010608	posttranscriptional regulation of gene expression	1.27849e-09	1.96454	94	AGO2, AKT1, APP, ATF4, ATXN2, BOLL, CARHSP1, CCL5, CDK4, CELF4, DCP1A, DCP2, DDX5, E2F1, EGFR, EIF4A3, EIF4EBP1, EIF4H, EIF5A2, ERBB2, ESR1, FOXO3, FXR2, GAPDH, GRB7, HSPB1, MAPK1, MAPK14, MAPK3, NOTCH4, NPM1, NUDT21, PABPC1, POLDIP3, PPARG, PPP1CA, PPP1R8, PRKCA, PRKCD, RACK1, RAN, RBM10, RGS2, RHOA, RPL5, RPS6KB1, RPS6KB2, RXRA, SARNP, SEPSECS, SMAD1, SMAD2, SMAD3, SNIP1, SOX4, STAT3, SYNCRIP, …
GO:0001525	angiogenesis	1.41146e-09	1.9605	94	ABL1, AGO2, AKT1, BRCA1, CCL8, CDC42, COL15A1, CTNNB1, DAG1, DLL1, ERBB2, FGFR4, FN1, GATA2, GLUL, HAND2, HDAC5, HGS, HIF1A, HMGB1, HSPB1, JAK1, JUN, JUP, KLF5, KRT1, LEF1, MAPK14, NOS3, NOTCH1, NOTCH3, NOTCH4, NR4A1, PDPK1, PML, PPARG, PRKCA, PTEN, PTN, RECK, RHOA, RNF213, RUNX1, S100A1, SAT1, SH2D2A, SIRT1, SMAD1, SP1, SPRY2, SRPK2, STAT1, STAT3, SYK, SYNJ2BP, TAL1, TGFBR1, WNT5A, AGO1, AQP1, C…
GO:0090130	tissue migration	1.99799e-09	2.297	64	ABL1, AKT1, APOE, ARF6, BMPR2, CSNK2B, GATA2, GLUL, HBEGF, HDAC5, HDAC6, HIF1A, HMGB1, HSPB1, JUN, JUP, KANK2, MAPK14, NOS3, NOTCH1, NR4A1, PAXIP1, PDGFB, PDPK1, PPARD, PPARG, PRKCA, PTEN, RHOA, SIRT1, SP1, SRC, STAT1, STAT5A, SYNJ2BP, TGFBR1, WNT5A, ACTA2, CD40, CIB1, EFNB2, ETS1, FBXW7, FGFR1, KLF4, KRT16, MAP2K5, MAPRE2, MEF2C, MEOX2, MTOR, NR2F2, PIK3R3, PLK2, PROX1, RAB11A, SOX9, SPRED1, SRF…
GO:1903829	positive regulation of cellular protein localization	2.26619e-09	2.21084	69	AKT1, AP2B1, ARF6, BAD, BCL2, CASP8, CDC42, CDH1, CDK1, CDK5, E2F1, ECT2, EGFR, ERBB2, EZR, FLNA, GSK3B, JUP, MAPK1, MAPK14, MAPT, MDM2, MSN, NUP62, PDPK1, PDZK1, PLK1, PRKAA1, PRKAA2, PRKACA, PRKCD, PRKCI, PRNP, PSEN1, PTN, RACK1, RDX, SFN, SMAD3, SRC, SREBF2, TCF7L2, TP53, TSG101, YWHAB, YWHAG, YWHAQ, YWHAZ, BAG3, CCT4, CDT1, CIB1, FBXW7, FZD5, GLIS2, HDAC3, MAPK8, MARK4, PIK3R1, RAB11A, TP63, …
GO:0042063	gliogenesis	2.42029e-09	2.33804	61	ABL1, AKT1, APP, CDK1, CDK5, CDK6, CDKN2C, CREB1, CTNNB1, DAG1, DLL1, DTX1, E2F1, EGFR, ERBB2, ERBB3, EZH2, GFAP, HDAC1, LEF1, MAPK1, MAPK3, MAPT, MYB, NAB2, NEUROD4, NF2, NKX2-1, NLGN3, NOTCH1, PPARG, PPP1CC, PRKCI, PSEN1, PTEN, PTN, RELA, RHEB, RHOA, SOX4, STAT3, TAL1, VIM, ASCL1, CCL2, CCL3, DAB1, EEF2, MAP2K1, MTOR, OLIG2, PAX6, POU3F2, ROR2, SIRT2, SOX9, TP73, GCM1, P2RX4, PARD3, TSPO
GO:0010948	negative regulation of cell cycle process	2.42029e-09	2.30178	63	ATM, AURKA, BCL2, BCL6, BRCA1, CARM1, CCNB1, CCND1, CDC6, CDK1, CDK2, CDK4, CDKN1B, CHEK1, CHMP2A, DACT1, E2F1, EED, EP300, EZH2, IK, KANK2, KAT2A, KAT2B, MAX, MDM2, MLXIPL, MUC1, NPM1, PCNA, PLK1, PML, PRMT1, PTEN, RB1, RBX1, SFN, SOX4, TERF1, TERF2, TOM1L1, TP53, TRIM37, TRIP13, ATF5, CCL2, CDKN2B, CDKN2D, CDT1, CNOT4, DUX4, FBXW7, KLF4, MDM4, MRE11, MSH6, NBN, PLAGL1, PLK2, PRKDC, PRMT2, RNF2,…
GO:0071241	cellular response to inorganic substance	2.76052e-09	2.52712	52	AKT1, APP, ATF4, ATP13A2, BACE1, BAD, CCNB1, CDH1, CDK2, CDKN1B, CREB1, CRK, DLG4, ECT2, EEF2K, EGFR, EIF4A3, FOS, FOXO1, JUN, JUNB, MAPK1, MAPK3, MAPK9, MEF2A, MYOG, PRKAA1, PRKAA2, PRNP, SUMO1, SYT17, TFAP2A, TRAF2, WNK1, WNT5A, AQP1, BECN1, CEBPA, CHUK, CYP11B2, FOSB, GUCY1B1, JUND, MAPK8, MEF2C, PPARGC1A, FUS, KCNA1, NQO1, P2RX4, RASA4, TSPO
GO:0002064	epithelial cell development	4.90204e-09	2.51461	51	ADAMTSL4, AR, ARNTL, BAD, CDK6, CLOCK, CTNNB1, DLL1, ESR1, EZR, F2RL1, FLNA, FLNB, GSK3B, HIF1A, IKBKB, KLF5, MSN, NOTCH1, NOTCH4, PDGFB, PDPK1, PGR, PRDM1, RAP1B, RARG, RDX, RHEB, SFN, ST14, VIM, WNT5A, ACTA2, ADIPOQ, ARID4B, CDSN, FGFR1, FOSL2, HNF4A, MAGI2, PAX6, PDZD7, PROX1, RARA, RARB, SOX9, TP63, VEZF1, WHRN, CDH5, HSD17B4
GO:0048568	embryonic organ development	7.11527e-09	1.99299	83	AKT1, ARNT, CASP8, CEBPB, CTNNB1, DLL1, EGFR, EIF4A3, GATA2, GRB2, HAND2, HIF1A, HOXB6, JUNB, KMT2A, KRT19, LEF1, MAPK1, MAPK3, MDFI, NCOA1, NOTCH1, PDGFB, PRDM1, PSEN1, RARG, RUNX2, RYR2, SMAD2, SMAD3, SP3, SPRY2, ST14, TAL1, TFAP2A, TGFBR1, ZEB1, WNT5A, ALX1, ARID1A, CDX2, CEBPA, CITED1, CITED2, CXCL8, EPAS1, FGFR1, FOXH1, FZD5, GATA4, HOXA1, HOXB1, HOXB2, HOXB3, HOXB4, HOXB7, HOXD10, HOXD4, KC…
GO:0009896	positive regulation of catabolic process	7.16915e-09	2.01155	81	ADRB2, AGO2, AKT1, APOE, ARNT, ATM, ATXN3, AURKA, BAD, BAG6, BARD1, CALCOCO2, CDKN1B, CSNK1A1, CSNK2A1, CUL4B, DACT1, EZR, FAF1, FBXL5, FOXO1, GSK3B, HDAC6, HIF1A, HMGB1, IRS1, MAPK3, MAPK9, MDM2, MID2, MLXIPL, MSN, MYLIP, NEDD4, PABPC1, PIAS1, PLK1, PPARA, PRKAA1, PRKAA2, PRKCD, PSEN1, PTEN, RACK1, RAD23A, RBX1, RDX, RNF41, SGTA, SIRT1, SNF8, SUMO1, SUMO2, TSC1, UBQLN1, UPF1, VCP, NRDC, WNT5A, B…
GO:0071900	regulation of protein serine/threonine kinase activity	8.49481e-09	1.90062	93	ABL1, ACTB, ADRB2, AKT1, APOE, CALM1, CASP3, CCNB1, CCND1, CCND2, CDC6, CDK1, CDK4, CDKN1B, CDKN2C, CRK, EGFR, ERBB2, ERN1, EZH2, GADD45G, GPS1, GPS2, HGS, HSPB1, KAT2B, LAMTOR3, MAGED1, MAP3K14, MAP3K8, MAPK1, MAPK14, MAPK3, NUP62, PDGFB, PLK1, PRKAA1, PRKCD, PSEN1, PTEN, RGS2, RHOA, RIPK1, SERTAD1, SFN, SIRT1, SNF8, SPRY2, SRC, SYK, TCL1A, TGFBR1, TRAF2, TRAF6, TSG101, UBC, WNK1, YWHAG, RPTOR, …
GO:0071216	cellular response to biotic stimulus	8.64596e-09	2.42488	53	ABL1, AKT1, CCL5, CDK4, CEBPB, GSK3B, HAMP, HDAC5, HMGB1, IRF3, LDOC1, MAPK1, MAPK14, MAPK3, NFKB1, NFKBIA, NOS3, NR1H3, PAF1, PDCD1LG2, PPARD, PRKCA, RELA, RHOA, SELENOS, SRC, SYK, TNIP2, TP53, TRAF6, UPF1, VIM, WNT5A, CASP1, CCL2, CCL3, CD40, CXCL8, DDIT3, FZD5, HMGB2, LCN2, MAPK8, MEF2C, NR1H2, NR1H4, PDCD4, PPARGC1A, RARA, SIRT2, ZC3H12A, LBP, TSPO
GO:0001667	ameboidal-type cell migration	1.68029e-08	2.02608	76	ABL1, AGO2, AKT1, APOE, ARF6, BMPR2, CSNK2B, FN1, GATA2, GLUL, HAND2, HBEGF, HDAC5, HDAC6, HIF1A, HMGB1, HSPB1, JUN, JUP, KANK2, MAPK14, NOS3, NOTCH1, NR4A1, PAXIP1, PDGFB, PDPK1, PML, PPARD, PPARG, PRKCA, PTEN, RHOA, SGPL1, SIRT1, SP1, SRC, STAT1, STAT5A, SYNJ2BP, TGFBR1, CYGB, FER, WNT5A, ALX1, CD40, CFL1, CIB1, EFNB2, ETS1, FBXW7, FGFR1, KLF4, KRT16, MAP2K5, MAPRE2, MEF2C, MEOX2, MTOR, NR2F2, …
GO:0035051	cardiocyte differentiation	1.78303e-08	2.8094	39	CCNB1, CDK1, CXADR, DLL1, EGFR, FHL2, HAMP, HAND2, IFT20, KAT2A, LMNA, MAPK1, MAPK3, MEF2A, NOTCH1, PIN1, PPARA, RGS2, RXRA, SMAD4, TSC1, ARID1A, DDX39B, DKK1, EFNB2, GATA4, GATA6, HNRNPU, MAML1, MAP2K4, MEF2C, MTOR, PDCD4, PROX1, RARA, RARB, SRF, TWIST1, FHOD3
GO:1901342	regulation of vasculature development	1.93342e-08	2.14175	66	ABL1, AGO2, BRCA1, CTNNB1, DLL1, ERBB2, GATA2, GLUL, HDAC5, HGS, HIF1A, HMGB1, HSPB1, JAK1, JUP, KRT1, NFATC2, NOS3, NOTCH1, PDGFB, PDPK1, PML, PPARG, PRKCA, PTN, RECK, RHOA, RUNX1, S100A1, SIRT1, SMAD1, SP1, SPRY2, STAT1, STAT3, SYNJ2BP, SERPINB7, WNT5A, AGO1, AQP1, CD40, CIB1, CXCL8, EFNB2, EGR1, ETS1, FBXW7, GATA4, GATA6, KLF2, KLF4, MAP2K5, MEOX2, NFATC1, PDCD4, PLK2, PRKCB, SPHK1, SPRED1, TW…
GO:0043254	regulation of protein complex assembly	1.96654e-08	1.93143	85	ABI2, ABL1, AKAP9, APOE, ARF1, ARF6, ARPC3, ATF7IP, ATM, ATR, ATXN2, BIRC2, CDC42, CDKN1B, CREB1, CTNNB1, CUL4B, DACT1, DCTN1, EP300, EPS8, ESR1, FAF1, GFAP, GMFB, GRB2, GSK3B, GTF2B, HDAC6, HMGB1, HNF1A, JMY, JUN, MAPK9, MAPT, MITF, MSN, PAN2, PAN3, PAXIP1, PRKAA1, PRKAA2, PRKCD, PRKCZ, RAC1, RACK1, RB1, RBX1, RDX, RHOA, SPIRE1, SRC, STMN2, STX1B, SUB1, SUMO1, TAL1, TCL1A, TERF1, TFIP11, THRA, T…
GO:0007219	Notch signaling pathway	2.65696e-08	2.52554	46	ADAM10, AKT1, APH1A, APP, BCL6, BHLHE40, CDKN1B, CREBBP, DLL1, DTX1, DTX2, EGFR, EP300, GATA2, KAT2B, KRT19, MYC, NEUROD4, NFKBIA, NOTCH1, NOTCH3, NOTCH4, PRKCI, PSEN1, SNW1, STAT1, STAT3, SYNJ2BP, TSPAN14, TSPAN15, APH1B, ASCL1, CEBPA, ELF3, FBXW7, GATA5, MAML1, NCSTN, NOTCH2, NR1H4, PSENEN, SNAI1, SOX9, TP63, YBX1, SLC35C2
GO:0045444	fat cell differentiation	2.65696e-08	2.41835	50	ADRB2, AKT1, ARNTL, CARM1, CCDC85B, CCND1, CEBPB, CREB1, CTBP1, CTBP2, E2F1, EP300, ERO1A, FOXO1, GATA2, GPS2, HDAC6, JDP2, KLF5, MAPK14, NR4A1, PIAS1, PPARD, PPARG, RGS2, RUNX1T1, SIRT1, SMAD3, TCF7L2, ZBTB16, WNT5A, ADIPOQ, ATF5, CEBPA, DDIT3, HNRNPU, KLF4, LMO3, MTOR, NR4A2, NR4A3, PPARGC1A, RORA, SAV1, SIRT2, SREBF1, TGFB1I1, ZBTB7B, ZC3H12A, ZFPM2
GO:0009314	response to radiation	2.70103e-08	1.92594	84	AKT1, APP, ATF4, ATM, ATR, BACE1, BCL2, BCL2L1, BHLHE40, BRCA1, CALM1, CASP3, CCL7, CCND1, CDK5, CHEK1, CLOCK, CREB1, CREBBP, CUL4B, DNMT3B, ECT2, EGFR, ELK1, EP300, FOS, GNB1, GRB2, HAMP, HIF1A, HMGN1, IFT20, JUN, JUNB, KAT5, KDM1A, MAPK14, MDM2, MGMT, MYC, NEDD4, NLGN3, NPM1, NR2F6, PAXIP1, PCNA, PIAS1, PML, POLB, PPP1CA, PPP1CB, PPP1CC, PRKAA1, PTN, RELA, RUVBL2, SIRT1, TP53, TP53BP1, TXN, XRC…
GO:0043620	regulation of DNA-templated transcription in response to stress	2.70103e-08	3.51591	27	ARNT, ATF4, CEBPB, CHEK1, CREBBP, CUL2, EP300, HIF1A, JUN, MUC1, NEDD4, NOTCH1, RBX1, RELA, TP53, UBC, RPS6KA1, BAG3, CITED2, DDIT3, EGR1, EPAS1, EPO, KLF2, NCK2, SIRT2, TMBIM6
GO:0002237	response to molecule of bacterial origin	2.77719e-08	2.09297	68	ABL1, AKT1, CARD9, CASP3, CASP8, CCL5, CDK4, CEBPB, ERBIN, FOS, GJB2, HAMP, HDAC5, HMGB1, IRF3, IRF5, JUN, JUNB, LDOC1, MAPK1, MAPK14, MAPK3, NFKB1, NFKBIA, NOS3, NOTCH1, NR1H3, PAF1, PDCD1LG2, PPARD, PRKCA, RELA, RHOA, RPS6KB1, SELENOS, SRC, TNIP2, TRAF6, UPF1, VIM, FER, WNT5A, CASP1, CCL2, CCL3, CD40, CHUK, CITED1, CXCL8, EPO, FZD5, HMGB2, JUND, LCN2, MAPK8, MEF2C, NFKB2, NR1H2, NR1H4, PDCD4, P…
GO:0045930	negative regulation of mitotic cell cycle	2.82061e-08	2.26153	57	ABL1, ATM, AURKA, BCL2, BCL2L1, BCL6, BRCA1, CARM1, CCNB1, CCND1, CDC6, CDK1, CDK2, CDKN1B, CHEK1, CTNNB1, DACT1, E2F1, EGFR, EP300, EZH2, GAS1, IK, KANK2, MDC1, MDM2, MUC1, NKX3-1, PCNA, PLK1, PML, PRMT1, PTEN, RB1, RBX1, SFN, SMAD3, SOX4, TOM1L1, TP53, TRIP13, CCL2, CDKN2B, CDT1, CNOT4, KLF4, MAGI2, MDM4, MRE11, MSH6, NBN, PLAGL1, PLK2, PRKDC, PRMT2, PTPN3, TTK
GO:0016049	cell growth	2.82061e-08	1.88969	88	ABL1, ADAM10, AKT1, APOE, APP, ARHGEF11, AURKA, BCL2, BCL6, BLZF1, BMPR2, CCDC85B, CDC42, CDK5, CDKL3, CDKN1B, CDKN2C, CSNK2A1, CTNNB1, EGFR, ERBB2, ESR2, FN1, GSK3B, HAMP, HBEGF, HDAC6, HTRA1, ING1, ITSN2, L1CAM, LEF1, MAPT, NLGN3, PIN1, PML, PPARA, PPARD, PPARG, PRKCZ, RACK1, RARG, RB1, RGS2, RHOA, SERTAD2, SFN, SIRT1, SMAD3, SMAD4, SPP1, SYT17, TCHP, TGFBR1, TP53, TRPC5, TSG101, RPS6KA1, RPTOR…
GO:0001101	response to acid chemical	3.47498e-08	2.08036	68	AKT1, ATM, BAD, BCL2L1, CASP3, CCNB1, CDK4, CDKN1B, CEBPB, CREB1, E2F1, EGFR, FGFR4, FOXO1, GJB2, GNB1, HAMP, LAMTOR3, MGMT, MYB, MYOG, NME1, PCNA, PDGFB, PPARG, PRKAA1, PRKAA2, PTN, RARG, RELA, RHOA, RPS6KB1, RXRA, SNW1, SRC, YES1, YY1, ZEB1, RPTOR, WNT5A, ADIPOQ, AQP1, ASCL1, CDKN2D, CFL1, CHUK, DKK1, EEF2, EGR1, KLF2, KLF4, MTOR, NR1H4, PPARGC1A, RARA, RARB, RRAGA, RRAGB, SOX9, SREBF1, TEAD2, …
GO:2000147	positive regulation of cell motility	4.77729e-08	1.85423	90	ABL1, ADAM10, AGO2, AKT1, APP, ARF6, ATM, BCL2, BMPR2, CCL5, CCL7, CCL8, CREB3, CRK, EGFR, F2RL1, FLNA, FN1, GATA2, GRB7, HBEGF, HDAC6, HIF1A, HMGB1, HSPB1, JUN, LEF1, MAPK1, MAPK14, MAPK3, MDM2, NOS3, NOTCH1, OXSR1, PDGFB, PDPK1, PLAU, PRKCA, RAC1, RACK1, RDX, RHOA, RPS6KB1, SIRT1, SMAD3, SP1, SPRY2, SRC, STAT3, STAT5A, TGFBR1, TRIP6, WNK1, CCR1, FER, WNT5A, CCL26, CCL3, CD40, CD74, CIB1, CXCL8,…
GO:1904951	positive regulation of establishment of protein localization	6.38811e-08	1.9059	82	ABL1, ARF1, ATP13A2, BAD, BCL2, CASP8, CDC42, CDH1, CDK1, CDK5, E2F1, ECT2, EGFR, ERBB2, EZR, F2RL1, FLNA, GAPDH, GLUL, GSK3B, HIF1A, HMGB1, IRF3, JUP, MAPK1, MAPK14, MAPK3, MBP, MDM2, PAEP, PDZK1, PPARD, PRKAA1, PRKACA, PRKCD, PRKCZ, PRNP, PSEN1, RACK1, SFN, SMAD3, SOX4, SRC, SREBF2, SYK, TCF7L2, TP53, TSG101, YWHAB, YWHAG, YWHAQ, YWHAZ, WNT5A, BAG3, CASP1, CCL3, CCT4, CHUK, CIB1, FBXW7, FZD5, H…
GO:0030900	forebrain development	8.78034e-08	1.97724	73	APP, BAD, CASP3, CDH1, CDK5, CDK6, CREB1, CRK, CTNNB1, E2F1, EGFR, EZH2, FLNA, GATA2, GSK3B, HDAC1, HIF1A, KAT2A, KDM1A, LEF1, NDE1, NEFL, NF2, NKX2-1, NME1, NOTCH1, NOTCH3, PSEN1, PTEN, PTN, RAN, RHOA, SHANK3, SRC, SRD5A2, TSC1, UCHL5, WNT5A, AQP1, ARID1A, ASCL1, ATF5, DAB1, DKK1, DLC1, EPHB3, ETS1, FGF13, FGFR1, LHX2, NEUROD1, NR2F2, NR4A2, NR4A3, OLIG2, OTX2, PAX5, PAX6, PITX1, POU3F2, PPARGC1…
GO:0031016	pancreas development	8.78034e-08	3.42966	26	AKT1, ARNTL, BAD, CDK6, CLOCK, CTNNB1, DLL1, FOXA2, FOXO1, GSK3B, HNF1A, NR5A2, PDPK1, RHEB, SMAD2, SOX4, TCF7L2, WNT5A, GATA6, HNF4A, NEUROD1, PAX6, PROX1, SOX9, ACVR2B, CCDC40
GO:1990089	response to nerve growth factor	9.00379e-08	4.0245	21	AKT1, APP, ARF6, ARPC3, CDC5L, CREB1, CRK, E2F1, EEF2K, EIF4A3, FOXO3, KAT2A, MAPT, PDPK1, PTEN, PTN, STMN2, CALCA, CIB1, EEF2, MAGI2
GO:0007249	I-kappaB kinase/NF-kappaB signaling	1.08378e-07	2.19612	56	ABL1, AKT1, BIRC2, BIRC3, BTRC, CARD9, CASP10, CASP8, CTNNB1, ECT2, ESR1, F2RL1, FLNA, HDAC1, HSPB1, IKBKB, IRF3, MAP3K14, MID2, NEK6, NFKBIA, NUP62, PDPK1, REL, RELA, RHOA, RIPK1, SIRT1, SNIP1, STAT1, TLE1, TNFRSF10B, TNIP2, TRAF2, TRAF6, UBC, UBE2I, ZDHHC17, WNT5A, ADIPOQ, APOL3, BCL3, CASP1, CD40, CD74, CHUK, EEF1D, NR1H4, PLK2, PRKCB, RORA, TIFA, UBD, ZC3H12A, PPM1B, TLR8
GO:0042176	regulation of protein catabolic process	1.08378e-07	1.97651	72	AKT1, APOE, ARAF, ARNTL, ATP13A2, ATXN3, AURKA, BAG6, BANP, BARD1, BTRC, CDH1, CDKN1B, CSNK1A1, CSNK2A1, CUL4B, DACT1, EEF1A1, EGFR, EZR, FAF1, FBXL5, FLNA, FOXO1, GFAP, GSK3B, HGS, MAPK9, MDM2, MSN, MYLIP, NEDD4, PIAS1, PIN1, PLK1, PML, PRKACA, PSEN1, PTEN, RACK1, RAD23A, RBX1, RDX, RELA, RNF41, RPL5, SGTA, SMAD3, SNF8, SUMO1, SUMO2, UBQLN1, UBQLN4, UCHL5, VCP, NRDC, WNT5A, CEBPA, FBXW7, HERPUD1…
GO:0048638	regulation of developmental growth	1.11879e-07	2.07023	64	ABL1, ADRB2, AKT1, APOE, APP, AR, BCL2, BMPR2, CARM1, CCNB1, CDK1, CDK4, CDK5, CDKL3, CDKN1B, CREB1, CXADR, DLL1, EZR, FN1, GSK3B, HAMP, ITSN2, L1CAM, MAPK14, MAPT, NOTCH1, PIN1, PPARA, PPARD, PTEN, RGS2, RPS6KB1, SGPL1, SPP1, STAT3, STAT5A, SYT17, TGFBR1, TRPC5, WNT5A, CTTN, DDX39B, FGF13, FGFR1, GATA6, GDI1, LATS2, MEF2C, MTOR, MYOD1, POU3F2, PRKDC, PROX1, RAB11A, SAV1, SRF, STAT5B, TP73, ZFPM2…
GO:0034248	regulation of cellular amide metabolic process	1.14543e-07	1.95227	74	AGO2, AKT1, APOE, APP, ATF4, ATP13A2, ATXN2, BOLL, CASP3, CCL5, CDK4, CELF4, EEF1A1, EIF4A3, EIF4EBP1, EIF4H, EIF5A2, ERBB2, FOXO3, FXR2, GAPDH, GFAP, GRB7, HSPB1, MAPK1, MAPK3, NOTCH4, NPM1, PABPC1, POLDIP3, PPP1CA, PRKAA1, PRKCD, PRNP, RACK1, RGS2, RHOA, RPL5, RPS6KB1, RPS6KB2, RXRA, SARNP, SEPSECS, SOX4, STAT3, SYNCRIP, TSC1, UPF1, VIM, RPS6KA1, USP16, AGO1, BCL3, DDX39B, EEF2, EIF4EBP2, ILF3,…
GO:0097191	extrinsic apoptotic signaling pathway	1.1458e-07	2.30842	50	AKT1, AR, BAD, BCL2, BCL2L1, BEX3, BRCA1, CASP3, CASP8, ERBB3, FAF1, FOXO3, GSK3B, KRT18, LMNA, NOS3, PDPK1, PML, PPP1CA, PTEN, RELA, RIPK1, RNF41, RPS6KB1, SKIL, SMAD3, SRC, TCF7L2, TGFBR1, TNFRSF10B, TRAF2, BAG3, BLOC1S2, CIB1, CTNNA1, CTTN, DEDD2, DEPTOR, FGFR1, HMGB2, LCN2, MAP2K5, MCL1, NOL3, PAK2, PIK3R1, ZC3HC1, ITM2C, THBS1, UNC5B
GO:0061008	hepaticobiliary system development	1.38014e-07	2.68437	37	ARF6, AURKA, CCND1, CEBPB, CSNK2B, CUL3, EGFR, EZH2, HAMP, HNF1A, JUN, NOTCH1, PCNA, PTN, RELA, SMAD3, SP3, UPF2, RPS6KA1, CEBPA, CITED2, DBP, DDX39B, FBXW7, GATA6, HNF4A, PCK2, PROX1, PTPN3, RARA, RARB, SOX9, SRSF5, CCDC40, CPS1, RPL19, UGT1A1
GO:0007389	pattern specification process	1.78808e-07	1.87659	80	ABI1, AR, AURKA, BHLHE40, BMPR2, CTNNB1, DLL1, EED, EP300, FOXA2, HAND2, HIF1A, HOXB6, HOXB9, KAT2A, LEF1, MDFI, NKX2-1, NKX3-1, NOTCH1, PRKACA, PSEN1, RARG, SMAD1, SMAD2, SMAD3, SMAD4, TGFBR1, YY1, ZBTB16, ZEB1, BICC1, WNT5A, ALX1, ASCL1, CDX2, CITED1, CITED2, DDIT3, DKK1, DMRT3, ETS2, FGFR1, FOXH1, FZD5, GATA4, GATA5, HOXA10, HOXB1, HOXB2, HOXB3, HOXB4, HOXB7, HOXC13, HOXC8, HOXD10, HOXD4, LHX2…
GO:0070371	ERK1 and ERK2 cascade	1.99364e-07	2.02518	65	ABL1, APIP, APOE, APP, ARHGAP8, CCL15, CCL16, CCL5, CCL7, CCL8, EGFR, ERBB2, ERBB3, EZR, F2RL1, FGFR4, FN1, HAND2, HMGB1, JUN, MAPK1, MAPK3, MARCO, MYC, NOTCH1, PDGFB, PIN1, PLA2G5, PRKCA, PRKCZ, PTEN, RAP1B, SMAD4, SPRY2, SRC, SYK, SYNJ2BP, CCR1, ADIPOQ, CCL14, CCL2, CCL23, CCL26, CCL3, CD74, CIB1, EPHB3, EPHB6, EPO, FBXW7, FGFR1, KLF4, LMO3, MAP2K1, MAP3K12, NOTCH2, ROR2, SOX9, SPRED1, THPO, CC…
GO:0051052	regulation of DNA metabolic process	2.01138e-07	1.90602	76	AKT1, ATM, ATR, BCL6, BMPR2, BRCA1, CBX8, CDC42, CDC6, CDK1, CDK2, CHEK1, CTNNB1, DCP2, EGFR, EXOSC10, FAF1, FGFR4, HMGB1, IL7R, JUN, KDM1A, KMT2A, KPNA2, MAPK1, MAPK3, MGMT, MLH1, MYC, NPAS2, NPM1, OTUB1, PAXIP1, PCNA, PDGFB, PML, POT1, PPARG, PRKCD, RAC1, SETDB1, SIRT1, SPIRE1, SRC, STAT6, TERF1, TERF2, TFIP11, TOM1L1, TP53, TP53BP1, UPF1, WIZ, ADIPOQ, CCT4, CD40, CDT1, DDX39B, DEK, ERCC6, FBXW…
GO:0034330	cell junction organization	2.14794e-07	2.10269	59	ABL1, ACTB, ACTN1, ARF6, BCL2, CDC42, CDH1, CTNNB1, CXADR, DSG1, DSG2, DSP, ECT2, F2RL1, FLNA, FN1, GJB2, IKBKB, JUP, KIFC3, KRT5, NF2, PDPK1, PKP2, PKP4, PRKACA, PRKCA, PRKCI, PTEN, RAC1, RAP1B, RDX, RHOA, RUNX1, SMAD3, SRC, TGFBR1, TRIP6, TSC1, CTNNA1, CTNND1, CTNND2, CTTN, DLC1, EPB41L3, FZD5, MAPRE2, NR1H4, PKP3, SMAD7, SNAI1, SRF, WHRN, CDH5, LIMS1, MYO9A, PARD3, SDC4, THBS1
GO:0010038	response to metal ion	2.34754e-07	1.96864	69	AKT1, APP, ATF4, ATP13A2, BACE1, BAD, BCL2, CALM1, CASP3, CASP8, CCNB1, CCND1, CDH1, CDK1, CDK4, CDKN1B, CREB1, DLG4, ECT2, EEF2K, EGFR, FOS, HAMP, HIF1A, JUN, JUNB, MAPK1, MAPK3, MAPK9, MAPT, MDM2, MEF2A, MYOG, NEDD4, PCNA, PPP1CA, PRKAA1, PRKAA2, PRNP, PTEN, RYR2, SUMO1, SYT17, TFAP2A, WNK1, WNT5A, AQP1, ASCL1, BECN1, CEBPA, CHUK, CYP11B2, FOSB, GDI1, JUND, MAPK8, MEF2C, PPARGC1A, CPS1, FUS, IG…
GO:0007178	transmembrane receptor protein serine/threonine kinase signaling pathway	2.44372e-07	2.01283	65	ABL1, BMPR2, CREB1, CREBBP, CSNK2B, DACT1, DDX5, EID2, EP300, FOS, HTRA1, JUN, LEF1, MAPK14, MAPK3, NKX2-1, NOTCH1, PDPK1, PIN1, PML, PRKCZ, RBPMS, RHOA, RUNX2, RYR2, SIRT1, SKIL, SMAD1, SMAD2, SMAD3, SMAD4, SNW1, SRC, SUB1, TGFBR1, UBC, UBE2D1, VIM, ZEB1, ZFYVE9, WNT5A, CDKN2B, CITED1, CITED2, DKK1, EGR1, FOXH1, FZD1, GATA4, HNF4A, ING2, MAGI2, PDCD4, ROR2, SMAD5, SMAD7, TGFB1I1, TTK, ACVR2B, CD…
GO:0022407	regulation of cell-cell adhesion	4.21097e-07	1.90942	72	ABL1, AKT1, BAD, BCL6, CASP3, CCL5, CDC42, CDH1, CEBPB, DTX1, ERBB2, FOXA2, GRB2, HMGB1, IL7R, LEF1, MAP3K8, MAPK14, MBP, MYB, NF2, PDCD1LG2, PDPK1, PLG, PPARA, PRKCA, PRKCD, PRKCZ, PRNP, RAC1, RDX, RELA, RHOA, RUNX1, RUNX3, SRC, SYK, TRAF6, WNK1, YES1, ZBTB16, WNT5A, ADIPOQ, CCL2, CCL28, CD74, CDSN, CITED2, EFNB2, EPHB3, EPO, ETS1, FOXP3, IRF1, KLF4, MAP2K5, NCK2, NR4A3, PAK2, PIK3R1, RARA, SELE…
GO:0010721	negative regulation of cell development	4.46896e-07	2.00594	63	APOE, APP, ARF6, ARHGDIA, BCL2, CARM1, CDK5, CDKL3, CRMP1, CTNNB1, DLL1, DTX1, FOXO3, GFAP, GORASP1, GSK3B, MDM2, MYLIP, NLGN3, NOTCH1, NOTCH3, PAEP, PPARA, PSEN1, PTEN, PTN, RGS2, RHOA, SMAD4, SPP1, STAT3, STMN2, STX1B, THRB, TLX3, TRPC5, TSC1, VIM, WNT5A, ASCL1, CIB1, CTNNA1, DAB1, EFNB2, FBXW7, FGF13, GDI1, LHX2, NR2F1, OLIG2, PAX6, PLK2, SIRT2, SOX9, TBX6, TP73, YWHAH, ITM2C, MELTF, PTPRG, SE…
GO:0061919	process utilizing autophagic mechanism	4.6307e-07	1.80379	84	ABL1, ADRB2, AKT1, ATM, ATP13A2, BAD, BCL2, CALCOCO2, CASP3, CDK5, CHMP2A, CLTC, EEF1A1, EP300, ERN1, FOXO1, GAPDH, GFAP, GOLGA2, HDAC6, HGS, HIF1A, HMGB1, HSPB1, IFT20, LAMTOR3, MAPK3, MAPT, MID2, NEDD4, PRKAA1, PRKAA2, PRKAB2, PRKACA, PSEN1, RHEB, RNF41, SIRT1, SNF8, SRC, SREBF2, TP53, TSC1, TSG101, UBQLN1, UBQLN4, VCP, VPS18, VPS37C, KAT8, RPTOR, BAG3, BECN1, CTTN, FBXW7, FZD5, GATA4, HERC1, M…
GO:0104004	cellular response to environmental stimulus	4.94315e-07	1.99967	63	AKT1, ATF4, ATM, ATR, BAD, BCL2L1, CALM1, CASP3, CASP8, CHEK1, CLOCK, CREBBP, CUL4B, DAG1, ECT2, EGFR, ELK1, EP300, GNB1, GRB2, HAMP, KDM1A, MAP3K14, MAPK14, MAPK3, MDM2, MGMT, MYC, MYOG, NEDD4, NFKB1, NPM1, OXSR1, PCNA, PTEN, PTN, RAC1, RUVBL2, SIRT1, TNFRSF10B, TP53, TP53BP1, XRCC6, YY1, AQP1, ASCL1, BAG3, BDKRB2, CASP1, CD40, EEF1D, EGR1, EPO, IRF1, MAP2K4, MAPK8, PIK3R1, SOX9, CDC25A, KCNJ2, …
GO:0051169	nuclear transport	5.02853e-07	1.94011	68	AKT1, ARNTL, ATXN1, BARD1, BCL6, CDH1, CDK1, CDK5, ECT2, EIF4A3, FLNA, GCKR, GSK3B, HMGA1, JUP, KPNA2, LMNA, MAPK1, MAPK14, MDM2, NEDD4, NFKBIA, NPM1, NUP62, NUP98, PHAX, PML, POLDIP3, PPP1CC, PRKACA, PRKCD, PSEN1, RAN, RANGAP1, RBM15B, SARNP, SFN, SIRT1, SMAD3, SMN1, STAT3, SYK, TCF7L2, TP53, TSC1, TXN, UPF1, UPF2, BAG3, BCL3, CITED1, DDX39A, DDX39B, HDAC3, NEUROD1, PIK3R1, RPS15, SRSF11, SRSF5,…
GO:0030323	respiratory tube development	5.02853e-07	2.42116	41	ATXN1, BAG6, BMPR2, CREB1, CTNNB1, DAG1, EGFR, EP300, HMGB1, MAPK1, MAPK3, NKX2-1, NOS3, NOTCH1, PGR, PPP1CA, PTN, RAB3A, SMAD2, SP3, SPRY2, THRA, THRB, WNT5A, ASCL1, CEBPA, EPAS1, FBXW7, FGFR1, GATA6, KLF2, MAP2K1, PROX1, SAV1, SOX9, SREBF1, SRF, ZFPM2, ACVR2B, CCDC40, CHI3L1
GO:0042110	T cell activation	5.1647e-07	1.82018	81	ABL1, AKT1, APBB1IP, BAD, BCL2, BCL6, CASP3, CASP8, CCL5, CDC42, CEBPB, CTNNB1, CXADR, DTX1, ERBB2, F2RL1, GRB2, HMGB1, IL7R, KAT2A, LEF1, MAP3K8, MSN, MYB, NEDD4, NFATC2, PDCD1LG2, PDPK1, PRDM1, PRKCZ, PRNP, PSEN1, RAC1, RHOA, RUNX1, RUNX2, RUNX3, SMAD3, SOX4, SP3, SRC, STAT3, STAT6, SYK, TRAF6, TSC1, YES1, ZBTB16, ZEB1, BCL3, CCL2, CCR9, CD74, EFNB2, EGR1, EPO, FOXP3, FZD5, HSH2D, IRF1, MTOR, N…
GO:0010639	negative regulation of organelle organization	5.16761e-07	1.91643	70	AKT1, ATM, BCL2L1, BRCA1, CCNB1, CHEK1, CHMP2A, CTBP1, DCP2, DNMT3B, EPS8, EXOSC10, GMFB, HDAC6, HMGA1, IK, KAT2A, KAT2B, LMNA, MAPT, MCM2, NPM1, OTUB1, PHF1, PLK1, POT1, PRKCD, PRMT6, RDX, RNF41, SHANK3, SIRT1, SMAD4, SMARCB1, SRC, STMN2, TCHP, TERF1, TERF2, TOM1L1, TRIM37, TRIM54, TRIP13, ARPIN, BAG3, BECN1, CDT1, CIB1, DLC1, FGF13, FOXP3, HNRNPU, MID1, NBN, NOL3, PAX5, PPARGC1A, PPP1R9A, RAD50…
GO:0097305	response to alcohol	5.16761e-07	2.1985	50	AHR, AKT1, BAD, BCL2L1, BIRC2, BRCA1, CALM1, CASP8, CCL7, CCND1, CDH1, CDK1, CDK4, CTNNB1, DAG1, EPS8, FOS, FOXO3, GNB1, HAMP, JUP, MGMT, NEFL, POLB, PPARG, PRKAA1, PRKAA2, PTEN, RGS2, RHOA, RPS6KB1, SETDB1, SMAD2, STAT3, TGFBR1, FDX1, ADIPOQ, CCL3, CTNNA1, EEF2, FOSB, FOSL1, GRAMD1A, KLF2, KLF4, OXCT1, RARA, MSTN, NQO1, UGT1A1
GO:0062012	regulation of small molecule metabolic process	6.31972e-07	1.94874	66	AKT1, APOE, ARNT, BAD, BRCA1, CCNB1, CDK1, CLTC, FGFR4, FOXA2, FOXO1, GCKR, GNMT, GSK3B, HIF1A, HMGB1, IRS1, KAT2A, KAT2B, MLXIPL, MYOG, NCOA2, NFKB1, NOS3, NR1H3, PDGFB, PDZD3, PPARA, PPARG, PPP1CA, PRKAA1, PRKAA2, PRKAB2, RAN, RHOA, SELENOS, SIRT1, SP1, SRC, SREBF2, STAT3, TYSND1, VCP, ADIPOQ, DYRK2, EGR1, IRS2, MTOR, NCOR1, NFYB, NR1H2, NR1H4, NR4A3, POMC, PPARGC1A, PROX1, RORA, SNAI1, SREBF1,…
GO:0051493	regulation of cytoskeleton organization	6.39021e-07	1.76733	87	ABI2, ABL1, AKAP9, ARF1, ARF6, ARHGDIA, ARPC3, AURKA, BRCA1, CDC42, CDK5, CDKN1B, CHEK1, CHMP2A, CLTC, CRK, CTNNB1, DCTN1, ECT2, EPS8, EZR, F2RL1, FLNA, GMFB, GRB2, GSK3B, HDAC6, JMY, KAT2A, KAT2B, MAPK1, MAPK3, MAPT, NF2, NPM1, NUP62, PLK1, PRKAA1, PRKAA2, PRKCD, RAC1, RASSF1, RDX, RHOA, SHANK3, SMAD3, SMAD4, SPIRE1, STMN2, TGFBR1, TPX2, TRIM27, TRIM37, TRIM54, TSC1, FER, ARPIN, ATF5, CCL26, CFL…
GO:0060541	respiratory system development	6.39021e-07	2.3156	44	ATXN1, BAG6, BMPR2, CREB1, CTNNB1, DAG1, EGFR, EP300, HMGB1, LEF1, MAPK1, MAPK3, NKX2-1, NOS3, NOTCH1, PGR, PPP1CA, PTN, RAB3A, RARG, SMAD2, SP3, SPRY2, THRA, THRB, WNT5A, ASCL1, CEBPA, EPAS1, FBXW7, FGFR1, GATA6, KLF2, MAP2K1, PROX1, RARA, SAV1, SOX9, SREBF1, SRF, ZFPM2, ACVR2B, CCDC40, CHI3L1
GO:0031647	regulation of protein stability	6.51302e-07	2.09228	55	AURKA, BAG6, BCL2, BTRC, CASP3, CREB1, CREBBP, CUL3, DACT1, DSG1, EP300, FLNA, GAPDH, HDAC6, KAT2A, LMNA, MAPK1, MDM2, MYLIP, NF2, PIN1, PLK1, PRKCD, PRNP, PTEN, RAD23A, RPL5, SIRT1, SMAD3, SOX4, SRC, SUMO1, TNIP2, TSC1, WIZ, BAG3, CCT4, FBXW7, HDAC3, MDM4, NCLN, PIK3R1, PPARGC1A, PRKDC, SAV1, SMAD7, SREBF1, STX12, TADA3, TRIM21, USP19, CCDC88C, CCT8, RNF149, USP36
GO:0034504	protein localization to nucleus	6.51302e-07	2.09228	55	AKT1, ARNTL, BANP, BARD1, BCL6, CDH1, CDK1, CDK5, ECT2, FLNA, GBP2, GCKR, GSK3B, JUP, KPNA2, LMNA, MAPK1, MAPK14, MDM2, NF2, NFKBIA, NR5A1, NUP62, NUP98, PAF1, PIN1, PLK1, PML, PRKCD, PSEN1, RAN, RANGAP1, SIRT1, SMAD3, SRC, STAT3, SUMO1, SYK, TRIM29, TXN, ZBTB16, BAG3, BCL3, CCT4, GLIS2, HDAC3, HNRNPU, PIK3R1, SOX9, TSC2, YWHAE, ZC3H12A, ZIC1, CCT8, SNUPN
GO:0070646	protein modification by small protein removal	6.59936e-07	2.04552	58	ACTB, ADRB2, AR, ATXN3, BARD1, BIRC2, BIRC3, BRCA1, CDK1, COPS2, COPS5, COPS6, ESR1, GPS1, HIF1A, KAT2A, MDM2, MYC, NFKBIA, OTUB1, POLB, PSMB9, PTEN, RAD23A, RHOA, RIPK1, SKP2, SMAD1, SMAD2, SMAD3, SMAD4, STAMBP, STAMBPL1, TGFBR1, TNIP2, TP53, TRAF2, TRAF6, UBC, UBE2D1, UCHL5, VCP, YY1, NFRKB, USP16, BECN1, MDM4, PSMA5, PSMB1, SENP3, SMAD7, TADA3, TRIM21, USP1, USP19, ZC3H12A, CDC25A, USP36
GO:0042692	muscle cell differentiation	6.85481e-07	1.95328	65	ABL1, AKT1, BCL2, CASP3, CCNB1, CDC42, CDK1, CTNNB1, CXADR, DLL1, EZH2, FHL2, HAMP, HDAC1, HDAC5, IFT20, KAT2A, KDM1A, KRT19, LMNA, MAPK14, MEF2A, MYOG, NFATC2, NOTCH1, PDGFB, PIAS1, PIN1, PPARA, PTBP1, RB1, RGS2, RXRA, SIRT1, SMAD4, TCF3, TRIM54, TSC1, ZEB1, ARID1A, CHUK, CTNNA1, DDX39B, DKK1, EFNB2, GATA4, GATA6, HDAC3, HNRNPU, MAML1, MAP2K4, MEF2C, MTOR, MYOD1, NFATC1, PDCD4, PROX1, RARA, RARB…
GO:0031098	stress-activated protein kinase signaling cascade	9.2956e-07	1.99811	60	AKT1, APP, BTRC, CARD9, CDC42, COPS5, DACT1, EGFR, ERN1, EZR, F2RL1, FOXO1, GADD45G, GPS1, GPS2, HAND2, HMGB1, IKBKB, MAP3K14, MAP3K8, MAPK1, MAPK14, MAPK3, MAPK8IP2, MAPK9, MYC, NFKB1, OXSR1, PHLPP1, PRMT1, RHOA, RIPK1, SYK, TNIP2, TRAF2, TRAF6, UBC, WNT5A, CHUK, DKK1, DTNBP1, ERCC6, FZD5, HDAC3, MAGI3, MAP2K1, MAP2K4, MAP2K5, MAP3K12, MAP3K5, MAPK8, MID1, NCOR1, PAK2, PDCD4, ROR2, ZC3H12A, CCDC…
GO:0035265	organ growth	9.47783e-07	2.3899	40	AKT1, AR, BCL2, CARM1, CCNB1, CDK1, CXADR, DLL1, ESR1, HAMP, MAPK14, NOTCH1, PIN1, PPARA, PTEN, RARG, RGS2, RXRA, SMAD1, SMAD2, SPRY2, TGFBR1, DDX39B, FGFR1, GATA4, GATA6, LATS2, MAP2K4, MEF2C, MTOR, PROX1, RARA, RARB, SAV1, SOX9, TP73, ZFPM2, ACVR2B, DDR2, POC1A
GO:0009299	mRNA transcription	9.50387e-07	5.28167	13	ARNT, ATF4, DDX5, FLNA, HIF1A, LMO2, MYOG, PPARD, STAT3, TP53, DDIT3, SREBF1, SRF
GO:0001819	positive regulation of cytokine production	1.34729e-06	1.82244	75	ABL1, ARNT, ATF4, BIRC2, BIRC3, BRCA1, CARD9, CEBPB, CREB1, CREBBP, CTNNB1, EP300, F2RL1, GAPDH, HIF1A, HMGB1, HSPB1, IRF3, IRF5, IRF7, MAPK14, MAPK3, MBP, MYB, NFKB1, PAEP, PRKCZ, RELA, RIPK1, RUNX1, SMAD3, SRC, STAT1, STAT3, STAT6, SYK, TRAF2, TRAF6, XRCC6, SERPINB7, WNT5A, ADIPOQ, BCL3, CASP1, CCL3, CD40, CD74, CHUK, DDIT3, EGR1, FOXP3, FZD5, GATA4, HMGB2, IRF1, MRE11, NFKB2, NR4A3, PIK3R1, PO…
GO:0009743	response to carbohydrate	1.34762e-06	2.16684	48	BAD, CASP3, CDKN1B, ENSA, ERN1, FOXA2, FOXO3, GCKR, GLUL, HIF1A, MLXIPL, NME1, PPARD, PRKAA1, PRKAA2, PRKACA, PTEN, RACK1, RAP1B, RHOA, RPS6KB1, SELENOS, SMAD2, SMARCB1, SOX4, TCF7L2, ADIPOQ, CDT1, EGR1, GATA4, HNF4A, IRS2, MAP2K4, NEUROD1, NR1H4, OXCT1, PCK2, PPARGC1A, PRKCB, SREBF1, SRF, UBTF, ACVR2B, BAIAP3, GPR27, NDUFA9, SLC6A1, THBS1
GO:0043491	protein kinase B signaling	1.3794e-06	2.14524	49	AKT1, CCL5, DAG1, EGFR, ERBB2, ERBB3, ESR1, FGFR4, GRB2, HBEGF, IRS1, ITSN1, NKX3-1, NRG2, PDGFB, PHLPP1, PTEN, RAC1, RACK1, RNF41, RPS6KB1, RPS6KB2, SIRT1, SPRY2, SRC, TCF7L2, TGFBR1, TXN, CCL2, CCL3, CD40, CIB1, DDIT3, FGFR1, IRS2, KLF4, MAGI2, MTOR, PIK3R1, PIK3R3, SIRT2, SOX9, THPO, TSC2, CHI3L1, ICOS, MSTN, P2RX4, THBS1
GO:0097327	response to antineoplastic agent	1.45988e-06	2.91745	27	ADAM10, BRCA1, CDH1, CDK4, CTNNB1, DNMT3B, EGFR, EIF4EBP1, FOXO1, FOXO3, GJB2, JUP, NEFL, NR3C1, PCNA, PDGFB, PRKAA1, RPS6KB1, KDM3B, AQP1, CTNNA1, EGR1, EPO, PCK2, ZC3H12A, CPS1, MSTN
GO:0016358	dendrite development	1.45988e-06	2.17983	47	ABI1, ADAM10, APOE, APP, ARF1, ARF6, CARM1, CDC42, CDK5, CDKL3, CRK, DLG4, EEF2K, EZH2, GORASP1, GRIP1, GSK3B, HDAC6, MAPK8IP2, MEF2A, NEDD4, NLGN3, PSEN1, PTEN, RHOA, SHANK3, SS18L1, TRPC5, SLC12A5, CFL1, CTNND2, DAB1, DCDC2, DTNBP1, EPHB3, MEF2C, MTOR, NCK2, PAK2, PLK2, PPP1R9A, RBFOX2, TRAPPC4, YWHAH, ANAPC2, DBN1, TRAK2
GO:0048144	fibroblast proliferation	1.9152e-06	3.02294	25	CCNB1, CDC6, CDK4, CDK6, CREB1, CTNNB1, E2F1, EGFR, ESR1, FN1, JUN, MYB, MYC, PDGFB, PML, PPARG, TP53, WNT5A, AQP1, CD74, FOSL2, NUPR1, PRKDC, SPHK1, DDR2
GO:0031345	negative regulation of cell projection organization	2.02146e-06	2.32161	40	APOE, ARF6, ARHGDIA, CARM1, CDK5, CDKL3, CRMP1, GFAP, GORASP1, MDM2, MYLIP, NLGN3, PRKCD, PRNP, PSEN1, PTEN, RHOA, SPP1, SPRY2, STMN2, STX1B, TCHP, TRPC5, TSC1, VIM, WNT5A, ARPIN, CIB1, DAB1, EFNB2, FGF13, GDI1, NR2F1, PLK2, TBX6, YWHAH, ITM2C, PTPRG, SEMA6A, TRAK2
GO:0045927	positive regulation of growth	2.34496e-06	2.07204	51	ADAM10, AKT1, BCL2, BMPR2, CCNB1, CDC42, CDK1, CREB1, CSNK2A1, DLL1, EGFR, ERBB2, EZR, FN1, HAMP, HBEGF, ITSN2, L1CAM, LEF1, MAPK14, MAPT, NOTCH1, PIN1, PPARD, RHOA, RPS6KB1, SFN, SYT17, TGFBR1, TRPC5, RPS6KA1, RPTOR, CIB1, DDX39B, FGFR1, GATA6, GDI1, MAP2K5, MEF2C, MTOR, MYOD1, POU3F2, PRKDC, PROX1, RAB11A, SPHK1, SRF, STAT5B, ZFPM2, ANAPC2, CXCL12
GO:0032147	activation of protein kinase activity	2.36657e-06	1.93016	61	ABL1, ADRB2, AKT1, CCL5, CDK1, CRK, ECT2, EGFR, ERN1, GADD45G, HMGB1, LAMTOR3, MAP3K14, MAP3K8, MAPK1, MAPK14, MAPK3, OXSR1, PDGFB, PDPK1, PRKAA1, PRKACA, PRKCD, PRKCZ, PRNP, PSEN1, RIPK1, SRC, SYK, TGFBR1, TNFRSF10B, TOM1L1, TPX2, TRAF2, TRAF6, TXN, UBC, WNK1, RPTOR, WNT5A, CALCA, CD74, EPO, ERCC6, FGF13, MAP2K1, MAP2K4, MAP2K5, MAP3K12, MAP3K5, MLST8, MTOR, PAK2, PRR5, TP73, ACVR2B, CHI3L1, DUS…
GO:0045862	positive regulation of proteolysis	2.40074e-06	1.8952	64	AKT1, APOE, APP, ATXN3, AURKA, BAD, BAG6, BEX3, BTRC, CASP10, CASP3, CASP8, CSNK1A1, CYCS, FGFR4, FN1, GSK3B, HMGB1, MAPK14, MAPK3, MAPK9, MAPT, MBP, MDM2, MTCH1, MYC, NKX3-1, PIAS1, PLK1, PML, PPARG, PSEN1, PTEN, RACK1, RAD23A, RBX1, RHOA, RIPK1, SGTA, SIRT1, SMAD3, SRC, STAT3, SUMO1, SUMO2, TNFRSF10B, TRAF2, UBQLN1, VCP, NRDC, CASP1, CASP4, CEBPA, DLC1, FBXW7, HERPUD1, MAP3K5, PLK2, SIRT2, SMAD…
GO:1905475	regulation of protein localization to membrane	2.69072e-06	2.29538	40	ACTB, ADAM10, AKT1, AP2B1, AR, ARF6, BAD, BCL2, BCL2L1, CASP8, CDK5, CLTC, DAG1, E2F1, EGFR, ERBB2, EZR, GOPC, PDPK1, PDZK1, PRKCI, PRKCZ, PRNP, PTN, RACK1, SFN, TP53, YWHAB, YWHAG, YWHAQ, YWHAZ, CIB1, GDI1, MAPK8, PIK3R1, RAB11A, TP63, TP73, YWHAE, YWHAH
GO:1903320	regulation of protein modification by small protein conjugation or removal	2.69855e-06	2.15311	46	ABL1, ADRB2, AKT1, ARNT, BIRC2, BIRC3, BRCA1, CDK5, CTNNB1, CUL3, GOLGA2, GORASP1, GPS2, KDM1A, MAPK9, OTUB1, PAXIP1, PIAS1, PIN1, PLK1, PSEN1, PTEN, RELA, RPL5, SKP2, SOX4, TGFBR1, TRAF6, UBE2D1, UBE2I, UBQLN1, VCP, CENPS-CORT, EGR1, FBXW7, HERPUD1, MTOR, PIAS3, SMAD7, SPHK1, TRIM21, ZC3H12A, ARRDC4, GNL3, MASTL, TSPO
GO:0071559	response to transforming growth factor beta	2.86143e-06	2.09116	49	BMPR2, CREB1, CREBBP, CRK, EID2, EP300, FOS, HTRA1, JUN, NKX2-1, NR3C1, PDPK1, PIN1, PML, PRKCZ, RHOA, RUNX3, SIRT1, SKIL, SMAD1, SMAD2, SMAD3, SMAD4, SNW1, SRC, STK16, TGFBR1, UBC, YES1, ZEB1, ZFYVE9, WNT5A, CDKN2B, CITED1, CITED2, FOXH1, ING2, MEF2C, PPARGC1A, SMAD5, SMAD7, SOX9, TGFB1I1, ACVR2B, CDH5, LIMS1, MSTN, PARD3, THBS1
GO:1903311	regulation of mRNA metabolic process	2.88163e-06	2.02378	53	AGO2, AKT1, BARD1, CARHSP1, CCNB1, CELF4, DCP1A, DCP2, DDX5, E2F1, FXR2, HNRNPK, HSPB1, MAPK14, NPM1, NUDT21, NUP98, PABPC1, PAF1, PRKCA, PRKCD, PTBP1, RBM10, RBM15B, SNRPA, SNW1, SRPK2, SYNCRIP, UBC, UPF1, VIM, YWHAB, YWHAZ, APEX1, DDX17, HNRNPU, KHDRBS2, MTOR, MYOD1, NSRP1, PKP3, POLR2G, RBFOX2, SET, SRSF5, TNRC6B, VIP, YBX1, ZC3H12A, IWS1, SERBP1, SRSF7, TNRC6C
GO:0019216	regulation of lipid metabolic process	2.88163e-06	1.83465	69	AKT1, APOE, ARF1, BRCA1, CARM1, CDK4, CREB1, CREBBP, FGFR4, FHL2, GPS2, IRS1, MLXIPL, NCOA1, NCOA2, NCOA6, NFKB1, NPAS2, NR1H3, NR5A1, PDGFB, PPARA, PPARD, PPARG, PRKAA1, PRKAA2, PRKAB2, PRKCD, RACK1, RAN, RB1, RXRA, SIRT1, SP1, SRC, SREBF2, SULT2A1, THRA, TYSND1, ADIPOQ, EGR1, FBXW7, HDAC3, HNF4A, IRS2, KLF4, MTOR, NCOR1, NFYB, NR1H2, NR1H4, NR4A3, NRBF2, PIK3R1, PIK3R3, PPARGC1A, PROX1, RORA, S…
GO:0010975	regulation of neuron projection development	3.49481e-06	1.73205	81	ABL1, ADAM10, AKT1, APOE, ARF1, ARF6, ARHGDIA, BMPR2, CARM1, CDK5, CDKL3, CRK, CRMP1, DLG4, EEF2K, EP300, EZH2, FN1, GFAP, GORASP1, GRIP1, GSK3B, ITSN2, KDM1A, L1CAM, MAPT, MDM2, MYLIP, NEDD4, NEFL, NLGN3, NME1, PRKCI, PSEN1, PTEN, PTN, RGS2, RHOA, SHANK3, SKIL, SPP1, SS18L1, STMN2, STX1B, SYT17, TRPC5, TSC1, VIM, WNT5A, CFL1, CIB1, CTTN, DAB1, EFNB2, EPHB3, EPO, FGF13, FGFR1, FZD1, GDI1, KLF4, M…
GO:0051961	negative regulation of nervous system development	3.83828e-06	1.94934	57	APOE, APP, ARF6, ARHGDIA, CARM1, CDK5, CDKL3, CRMP1, CTNNB1, DLL1, DTX1, FOXO3, GFAP, GORASP1, GSK3B, MDM2, MYLIP, NLGN3, NOTCH1, NOTCH3, PRKACA, PSEN1, PTEN, PTN, RHOA, SPP1, STAT3, STMN2, STX1B, THRB, TLX3, TRPC5, TSC1, VIM, WNT5A, ASCL1, CIB1, CTNNA1, DAB1, EFNB2, FGF13, GDI1, LHX2, NR2F1, OLIG2, PAX6, PLK2, SIRT2, SOX9, TBX6, TP73, YWHAH, ITM2C, PTPRG, SEMA6A, TRAK2, TSPO
GO:0002764	immune response-regulating signaling pathway	4.20536e-06	1.71728	82	ABI1, ABL1, ACTB, ARPC3, BAG6, BCL2, BIRC2, BIRC3, CALM1, CARD9, CASP8, CDC42, CREBBP, CRK, EP300, ERBIN, ESR1, EZR, F2RL1, FOS, GPS2, GRB2, HMGB1, IKBKB, IRF3, IRF7, JUN, MAPK1, MAPK3, MAPK9, MARCO, MUC1, NFATC2, NFKB1, NFKBIA, NR1H3, PDPK1, PLD2, PRKACA, PRKCD, PRNP, PSEN1, RAC1, RELA, RIPK1, RPS6KA5, RUNX1, S100A1, SPG21, SRC, SYK, TNIP2, TRAF6, UBASH3A, UBC, UBQLN1, WNK1, YES1, FER, CD40, CD7…
GO:0007162	negative regulation of cell adhesion	5.19931e-06	2.0156	51	ABL1, ADAM10, ADAMDEC1, AKT1, ARHGDIA, BCL6, CASP3, CDH1, CEBPB, DTX1, ERBB2, ERBB3, HMGB1, MBP, MUC1, NF2, NOTCH1, PDCD1LG2, PLG, PPARA, PRKCD, PRNP, PTEN, RDX, RHOA, RUNX1, RUNX3, SRC, WNK1, ADIPOQ, CCL28, CD74, CDKN2A, CDSN, DAB1, DLC1, FOXP3, IRF1, KLF4, MAP2K5, PIK3R1, SMAD7, ZBTB7B, ZC3H12A, CXCL12, MELTF, PLXNC1, RND1, SDC4, SEMA6A, THBS1
GO:0098732	macromolecule deacylation	5.21098e-06	2.62995	29	ATXN3, BAZ2A, BCL6, BRMS1, CHD3, CTBP1, EP300, HDAC1, HDAC5, HDAC6, JDP2, KDM1A, MAPT, MORF4L1, PRKAA1, PRKAA2, SIRT1, ARID4B, CHD4, FOXP3, HDAC3, ING2, MAPK8, MSL3, SIRT2, SPRED1, SREBF1, TADA3, ZBTB7B
GO:0061351	neural precursor cell proliferation	5.29852e-06	2.41497	34	CTNNB1, DISC1, FLNA, FOXO1, FOXO3, GATA2, HIF1A, IFT20, KDM1A, LEF1, NAP1L1, NDE1, NEUROD4, NF2, NOTCH1, PTBP2, RHOA, WNT5A, ASCL1, ATF5, CTNNA1, FGF13, FGFR1, LHX2, PAX6, POU3F2, PROX1, RORA, SIRT2, DBN1, DCT, GNAI2, KCNA1, TARBP2
GO:0000075	cell cycle checkpoint	5.55448e-06	2.11606	45	ATM, ATR, AURKA, BCL2L1, BRCA1, CARM1, CCNB1, CCND1, CDC5L, CDC6, CDK1, CDK2, CDKN1B, CHEK1, CLOCK, E2F1, EP300, IK, MAPK14, MDC1, MDM2, MUC1, PCNA, PLK1, PML, PRMT1, RB1, SFN, SOX4, TP53, TP53BP1, TRIP13, CDKN2B, CDT1, CNOT4, DDX39B, MDM4, MRE11, MSH6, NBN, PLAGL1, PLK2, PRKDC, PROX1, TTK
GO:0002694	regulation of leukocyte activation	5.59508e-06	1.71044	81	ABL1, AHR, AKT1, APP, ATM, BAD, BCL2, BCL6, CASP3, CCL5, CDC42, CEBPB, CTNNB1, DTX1, ERBB2, F2RL1, GATA2, GRB2, HMGB1, IKZF3, IL7R, KAT2A, MAP3K8, MLH1, MYB, NFATC2, NR1H3, PAXIP1, PDCD1LG2, PDPK1, PLA2G5, PRDM1, PRKCZ, PRNP, RAC1, RHOA, RNF41, RUNX1, RUNX3, SRC, STAT6, SYK, TNIP2, TP53BP1, TRAF6, YES1, ZBTB16, ZEB1, FER, WNT5A, CCL2, CD40, CD74, CEBPA, EFNB2, EPO, FOXP3, IRF1, IRS2, MEF2C, MSH6,…
GO:2001020	regulation of response to DNA damage stimulus	5.96504e-06	2.1515	43	ABL1, ATM, ATR, BCL2, BCL2L1, BRCA1, CBX8, CHEK1, DDX5, EGFR, HMGB1, HNRNPK, KDM1A, MAPT, MDM2, MGMT, MUC1, MYC, NKX3-1, NPAS2, OTUB1, PAXIP1, PCNA, PML, PRKCD, SIRT1, SKIL, SPIRE1, TERF2, TFIP11, TP53BP1, CD74, CDKN2D, DDX39B, DEK, ERCC6, ING2, MCL1, SNAI1, SPRED1, TWIST1, USP1, CXCL12
GO:0032606	type I interferon production	6.10921e-06	2.60668	29	CREBBP, CTNNB1, EP300, HMGB1, IRF3, IRF5, IRF7, NFKB1, PIN1, REL, RELA, STAT1, STAT6, SYK, TAX1BP1, XRCC6, YY1, CHUK, HMGB2, IRF1, MRE11, NFKB2, POLR3C, POLR3D, PRKDC, TRIM21, POLR3B, PPM1B, TLR8
GO:0034405	response to fluid shear stress	6.10921e-06	4.30906	14	AKT1, NOS3, SRC, SREBF2, CITED2, ETS1, HDAC3, KLF2, KLF4, MAP2K5, MEF2C, SMAD7, P2RX4, TFPI2
GO:0032886	regulation of microtubule-based process	6.70854e-06	2.14095	43	ABL1, AKAP9, AURKA, BRCA1, CDKN1B, CHEK1, CHMP2A, CLTC, CTNNB1, DCTN1, ERBB2, GSK3B, HDAC6, KAT2A, KAT2B, MAPT, NPM1, NUP62, PLK1, PRKAA1, PRKAA2, RAC1, RASSF1, RHOA, STMN2, TPX2, TRIM37, TRIM54, CCDC65, ATF5, CHORDC1, CIB1, FGF13, FSD1, HNRNPU, MAPRE2, MARK4, MID1, PLK2, CCDC40, CKAP2, EML2, POC1A
GO:0032355	response to estradiol	6.93782e-06	2.49896	31	BAD, CASP3, CASP8, CCND1, CDKN1B, CTNNB1, DNMT3B, EGFR, ESR1, EZH2, GJB2, KAT5, MYOG, PCNA, PTEN, PTN, RUVBL2, STAT3, EEF2, ESRRA, ETS1, MYOD1, NCOA3, NR2F2, PPARGC1A, RARA, STAT5B, IGFBP2, NQO1, SLC6A1, UGT1A1
GO:1904029	regulation of cyclin-dependent protein kinase activity	7.09363e-06	2.75087	26	ACTB, CASP3, CCNB1, CCND1, CCND2, CDC6, CDK4, CDKN1B, CDKN2C, KAT2B, PDGFB, PLK1, PTEN, SERTAD1, SFN, SRC, CCNE1, CDKN2A, CDKN2B, CDKN2D, CEBPA, INCA1, LATS2, NR2F2, PROX1, CDC25A
GO:0003012	muscle system process	7.27875e-06	1.75287	73	ADRB2, ARHGEF11, CALM1, DSC2, DSG2, DSP, EZH2, FLNA, FOXO1, GTF2IRD1, HAMP, HAND2, JUP, LMNA, MEF2A, MYL9, MYOG, NOS3, NOTCH1, PIN1, PKP2, PPARA, PRKACA, PRKCA, RGS2, RHOA, RPS6KB1, RYR2, SMAD3, SMAD4, SNTA1, SUMO1, TRIM63, VIM, CTNNA3, ACTA2, BDKRB2, BECN1, CALCA, CHUK, CTTN, DDX39B, EEF2, GAA, GATA4, GATA5, GATA6, GUCY1A1, KLF4, MAP2K4, MEF2C, MTOR, MYOD1, NOL3, NR4A3, PPARGC1A, SCN1A, SMAD5, S…
GO:0034341	response to interferon-gamma	8.09905e-06	2.16896	41	CALCOCO2, CCL15, CCL16, CCL5, CCL7, CCL8, CIITA, FLNB, GAPDH, GBP2, IRF2, IRF3, IRF5, IRF7, JAK1, NR1H3, PIAS1, PML, PPARG, PRKCD, RPS6KB1, STAT1, SUMO1, SYNCRIP, VIM, WNT5A, CASP1, CCL14, CCL2, CCL23, CCL26, CCL3, CD40, CITED1, IRF1, MID1, NR1H2, TRIM21, UBD, CCL13, TXK
GO:0060485	mesenchyme development	8.64701e-06	1.97714	51	BCL2, BMPR2, CTNNB1, DAG1, DDX5, ERBB3, EZH2, FN1, FOXA2, GSK3B, HAND2, HIF1A, HNRNPAB, LEF1, MAPK1, MAPK3, MDM2, MYC, NEDD4, NKX2-1, NOS3, NOTCH1, PTEN, SMAD2, SMAD3, SMAD4, STAT1, TGFBR1, WNT5A, ACTA2, ALX1, CFL1, CITED2, DDX17, FGFR1, FOXH1, GATA4, GATA5, MEF2C, MEOX1, MTOR, PDCD4, SMAD7, SNAI1, SOX9, TEAD2, TGFB1I1, TWIST1, ZFPM2, LIMS1, SEMA6A
GO:2000027	regulation of animal organ morphogenesis	9.68491e-06	2.10992	43	ABL1, AP2B1, AR, BCL2, BMPR2, CARM1, CDC42, CLTC, CTNNB1, DAAM1, DACT1, ESR1, HAND2, MAGED1, MYC, NOTCH1, PTN, RAC1, RHOA, RUNX2, RXRA, SMAD4, STAT1, TFAP2A, TGFBR1, THRB, WNT5A, CITED1, CITED2, DKK1, DMRT3, FBXW7, FGFR1, FZD1, FZD5, GATA5, HOXB7, MAGI2, PAX8, ROR2, SOX9, TWIST1, VDR
GO:0008213	protein alkylation	1.07645e-05	2.21821	38	BRCA1, CARM1, CTNNB1, DNMT3B, EED, EZH2, KMT2A, KMT2B, LMNA, MYB, PAF1, PAGR1, PAXIP1, PHF1, PRMT1, PRMT6, SETD1A, SETDB1, SIRT1, SMAD4, SMARCB1, SNW1, SUV39H1, ARID4B, ASH2L, AUTS2, CXXC1, FBXO11, KMT2C, NR1H4, PAX5, PRDM4, PRMT2, SATB1, WDR82, IWS1, MECOM, PWP1
GO:0006109	regulation of carbohydrate metabolic process	1.106e-05	2.27114	36	AKT1, ARNT, BAD, CLTC, FOXA2, FOXO1, GCKR, GNMT, GSK3B, HIF1A, HMGB1, IRS1, KAT2A, KAT2B, MLXIPL, MYOG, NCOA2, NFKB1, PDGFB, PPARA, PPP1CA, PRKAA1, PRKAA2, SELENOS, SIRT1, SRC, STAT3, ADIPOQ, DYRK2, IRS2, MTOR, NCOR1, POMC, PPARGC1A, RORA, PDK2
GO:1990868	response to chemokine	1.25028e-05	2.73039	25	ACKR2, CCL15, CCL16, CCL5, CCL7, CCL8, HIF1A, OXSR1, RHOA, WNK1, CCR1, CCL14, CCL2, CCL23, CCL26, CCL3, CCR4, CCR9, CIB1, CXCL8, THPO, ZC3H12A, CCL13, CXCL12, CXCR5
GO:0031929	TOR signaling	1.25028e-05	2.56214	28	AKT1, ARAF, ARNTL, ATM, EIF4EBP1, HIF1A, LAMTOR3, PRKAA1, PRKAA2, RHEB, RPS6KB1, SEC13, SIRT1, TSC1, RPTOR, DEPTOR, EIF4EBP2, HDAC3, MLST8, MTOR, PRR5, RRAGA, RRAGB, TSC2, WDR59, RHEBL1, RNF152, SH3BP4
GO:0050867	positive regulation of cell activation	1.37379e-05	1.86759	57	AKT1, APP, BAD, BCL2, BCL6, CCL5, CDC42, F2RL1, GATA2, GRB2, HMGB1, IL7R, MAP3K8, MLH1, MYB, NFATC2, PAXIP1, PDCD1LG2, PDPK1, PRKCZ, RAC1, RHOA, RUNX1, RUNX3, SRC, STAT6, SYK, TNIP2, TP53BP1, TRAF6, YES1, ZBTB16, RPS6KA1, WNT5A, CCL2, CD40, CD74, CEBPA, EFNB2, EPO, FOXP3, IRS2, MEF2C, MSH6, NCK2, NR4A3, PAK2, PIK3R1, RARA, SELENOK, STAT5B, ZBTB7B, ICOS, IGFBP2, IL23A, LBP, THBS1
GO:0010821	regulation of mitochondrion organization	1.39551e-05	2.193	38	AKT1, ATP13A2, BAD, BCL2, BCL2L1, CASP8, E2F1, GSK3B, HDAC6, HIF1A, LMNA, MAPT, PRKAA1, RNF41, SFN, SREBF2, TP53, YWHAB, YWHAG, YWHAQ, YWHAZ, BAG3, CTTN, FBXW7, FZD5, MAPK8, NOL3, PPARGC1A, SREBF1, STAT2, TP63, TP73, TSC2, YWHAE, YWHAH, MPV17L, TSPO, USP36
GO:0002683	negative regulation of immune system process	1.4357e-05	1.73354	71	A2M, AKT1, ATM, BCL6, CASP3, CDK6, CEBPB, CRK, CTNNB1, DLL1, DTX1, ERBB2, ERBIN, EZR, F2RL1, GATA2, GPS2, HMGB1, HTRA1, IL7R, MYC, NFKBIA, NME1, NOTCH1, NR1H3, PAF1, PDCD1LG2, PDPK1, PPARG, PRMT1, PRNP, RUNX1, RUNX3, SELENOS, STAT6, TAL1, TRIM27, UBASH3A, UBQLN1, ZBTB16, FER, ADIPOQ, CCL2, CCL28, CCL3, CD74, CIB1, FBXW7, FOXP3, GABPA, IRF1, KLF13, NR1H2, PIAS3, PIK3R1, PRKDC, RARA, SMAD7, SOX9, S…
GO:0008544	epidermis development	1.46289e-05	1.69656	76	BCL2, CASP3, CTNNB1, DLL1, DSC2, DSC3, DSG1, DSG2, DSP, EGFR, EZH2, FLNB, HDAC1, JUP, KRT1, KRT13, KRT15, KRT18, KRT19, KRT31, KRT40, KRT5, KRT6A, KRT6B, KRTAP10-3, NAB2, NOTCH1, PKP2, PKP4, PPARA, PPARD, RELA, RUNX1, SFN, SMAD4, ST14, TSG101, WNT5A, CDSN, DKK1, ELF3, FGFR1, FOSL2, HOXC13, KLF4, KRT16, KRT17, KRT25, KRT26, KRT27, KRT28, KRT35, KRT36, KRT38, KRTAP11-1, LCE1C, LCE1F, LCE3A, LHX2, M…
GO:0006338	chromatin remodeling	1.46289e-05	2.30227	34	ACTB, BAZ2A, CHEK1, CTNNB1, ESR1, HDAC1, HDAC5, HMGA1, HMGB1, KAT2A, KAT2B, KMT2B, MYB, MYC, NPM1, OIP5, PTMA, RB1, RUVBL2, SMARCB1, SMARCE1, TADA2A, ARID1A, CDKN2A, CENPS-CORT, CHD4, FOXP3, HMGB2, SATB1, SMARCC1, SOX9, TP63, CHD1, PBRM1
GO:0046777	protein autophosphorylation	1.54818e-05	2.03141	45	ABL1, AKT1, ATM, ATP13A2, ATR, AURKA, CALM1, CDK5, CLK1, EEF2K, EGFR, ERBB2, ERN1, FGFR4, GSK3B, JUN, MAPK3, MVP, NEK6, OXSR1, PDGFB, PDPK1, PPP2R5C, PPP2R5E, PRKACA, RIPK1, SRC, STK16, SYK, TOM1L1, WNK1, YES1, FER, ADIPOQ, EPHB3, FGFR1, MAP3K12, MRE11, MTOR, NBN, PAK2, RAD50, TTK, DDR2, TXK
GO:0009615	response to virus	1.56246e-05	1.84674	58	ARF1, BAD, BCL2, BCL2L1, BIRC2, BIRC3, CARD9, CCL5, CCL8, CDK6, F2RL1, FLNA, HMGA1, HSPB1, HTRA1, IFIT3, IKBKB, IRF2, IRF3, IRF5, IRF7, MAP3K14, MAPK14, PML, RELA, SKP2, SRC, STAT1, ACTA2, BCL3, BECN1, CD40, CFL1, CHUK, CREBZF, DDX17, ERCC6, FOSL1, FOXP3, HNRNPUL1, ILF3, IRF1, LCN2, PLSCR1, POLR3C, POLR3D, SELENOK, STAT2, ZC3H12A, CXCL12, GBP3, IL23A, MX1, POLR3B, PPM1B, TARBP2, TLR8, TSPAN32
GO:0006260	DNA replication	1.5858e-05	1.93287	51	ATM, ATR, BARD1, BCL6, BRCA1, CDC42, CDC6, CDK1, CDK2, CHEK1, EGFR, FAF1, HMGA1, JUN, KAT5, MCM2, NAP1L1, NCOA6, NUP98, ORC2, PCNA, POLA2, POLB, RAC1, TERF1, TERF2, UPF1, WIZ, CCNE1, CDT1, CENPS-CORT, FBXW7, FEN1, FGFR1, GINS3, ING4, ING5, MAP2K4, MCM3, MCM4, MCM5, MRE11, MSH6, NBN, ORC5, POLD2, POLI, RAD50, RECQL4, SET, REV1
GO:0030856	regulation of epithelial cell differentiation	1.66052e-05	2.35526	32	ARNTL, BAD, CCND1, CDKN1B, CEBPB, CLOCK, CTNNB1, DLL1, EZH2, GSK3B, IKBKB, NOTCH1, NOTCH4, RHEB, RUNX1, SFN, STAT1, ZEB1, ADIPOQ, ASCL1, CDSN, CITED1, KRT36, NCOA3, PAX6, PAX8, SOX9, STAT5B, TP63, VDR, VEZF1, CDH5
GO:0014074	response to purine-containing compound	1.93936e-05	2.27197	34	AHR, AKAP9, APP, BIRC2, CARM1, DNMT3B, EEF2K, EZR, FOS, JUN, JUNB, KDM1A, NME1, PLA2G5, PPARG, PRKAA1, PTEN, RAP1B, RELA, RYR2, STAT1, FDX1, ADIPOQ, APEX1, AQP1, CITED1, FOSB, FOSL1, JUND, PPARGC1A, SREBF1, CPS1, P2RX4, SLC6A1
GO:0038061	NIK/NF-kappaB signaling	1.9616e-05	2.45462	29	AKT1, APP, BIRC2, BIRC3, BTRC, EGFR, EZR, HMGB1, MAP3K14, NFKBIA, REL, RELA, RHOA, TNFRSF10B, TRAF2, TRAF6, TRIP6, AGO1, BCL3, CHUK, NFKB2, NOL3, PDCD4, SPHK1, ZC3H12A, CHI3L1, IL23A, LIMS1, PPM1B
GO:0001701	in utero embryonic development	2.16285e-05	1.79589	61	ADAM10, AKT1, ANKRD11, AR, ARNT, BCL2L1, BTF3, CASP8, CCNB1, CEBPB, CTNNB1, CUL3, DSC3, EGFR, ELL, GATA2, GRB2, HAND2, HIF1A, JUNB, KAT2A, KRT19, LEF1, MAPK1, MDFI, NCOA1, NOS3, NOTCH1, PDGFB, PRDM1, PRMT1, RXRA, SKIL, SMAD2, SMAD3, SMAD4, SP3, ST14, TGFBR1, APBA1, CDX2, CEBPA, CITED1, ELF3, EPAS1, FGFR1, FOSL1, FZD5, GABPA, GATA6, KLF2, MAP2K1, NBN, NR2F2, SNAI1, SRF, TWIST1, ZFPM2, GCM1, LPAR6,…
GO:0090559	regulation of membrane permeability	2.45113e-05	2.82855	22	BAD, BCL2, BCL2L1, CASP8, E2F1, GSK3B, SFN, STAT3, TP53, YWHAB, YWHAG, YWHAQ, YWHAZ, BLOC1S2, MAPK8, MTOR, NOL3, TP63, TP73, YWHAE, YWHAH, MPV17L
GO:0038127	ERBB signaling pathway	2.61934e-05	2.30515	32	ABL1, AKT1, APP, CDC42, EGFR, EPS8, ERBB2, ERBB3, ERBIN, GRB2, GRB7, HBEGF, HGS, MAPK1, MVP, NRG2, NUP62, PDPK1, PRKCA, PSEN1, RPS6KA5, SHC3, SPRY2, SRC, TSG101, FER, FBXW7, NCK2, PIK3R1, PTPN3, SOX9, CAMLG
GO:0048863	stem cell differentiation	2.71838e-05	2.06158	41	A2M, ABL1, ESR1, FN1, GATA2, HAND2, HIF1A, KMT2A, LMO2, MAPK1, MAPK3, MYB, NOTCH1, NUDT21, RUNX1, RUNX2, SETD1A, SMAD4, STAT3, TAL1, TCF12, TCF3, ALX1, ASCL1, CFL1, FZD1, GATA4, GATA6, HNRNPU, HOXB4, MEF2C, MEOX1, POU6F2, SOX9, SRF, TEAD2, TP63, TP73, TWIST1, PWP1, SEMA6A
GO:0090066	regulation of anatomical structure size	2.71838e-05	1.64766	79	ABI2, ABL1, ADRB2, AKT1, APOE, ARF1, ARF6, ARPC3, ATP13A2, BMPR2, CDK4, CDK5, CDKL3, CREB1, EGFR, EPS8, EZR, F2RL1, FN1, GMFB, GRB2, GSK3B, HNF1A, IL7R, JMY, KDM1A, L1CAM, MAPT, MSN, NEFL, NOS3, PPARD, PPP1CA, PRKCD, PTEN, RAC1, RARG, RDX, RGS2, RHOA, SHANK3, SNF8, SPIRE1, SPP1, TRIM27, TRPC5, TSC1, FER, LRRC8B, RPTOR, SLC12A5, WNT5A, ACTA2, AQP1, ARPIN, BDKRB2, CALCA, CCL26, CFL1, CTTN, DEPTOR, …
GO:0007369	gastrulation	2.87346e-05	2.14749	37	BMPR2, CTNNB1, CUL3, DAG1, FN1, FOXA2, LEF1, MBP, NF2, PAF1, PRKACA, RACK1, SMAD1, SMAD2, SMAD3, SMAD4, TAL1, WNK1, WNT5A, ADIPOQ, ARID1A, DKK1, ETS2, FGFR1, GATA6, HNF4A, KLF4, MAP2K5, NR4A3, OTX2, RNF2, SNAI1, SRF, TBX6, ZBTB17, ACVR2B, TGIF2
GO:0001655	urogenital system development	2.93655e-05	1.80709	58	APH1A, AR, BAG6, BCL2, CDKN1B, CTNNB1, DLL1, ESR1, GATA2, HNF1A, IFT20, KANK2, MAGED1, MYC, NKX3-1, NOTCH1, NOTCH3, PDGFB, PTEN, RARG, RXRA, SGPL1, SMAD1, SMAD2, SMAD3, SMAD4, SOX4, STAT1, TFAP2A, TGFBR1, TNS2, TSC1, ZBTB16, SERPINB7, WNT5A, ACTA2, ADIPOQ, CITED1, EFNB2, EGR1, EPHB3, FGFR1, GLIS2, HOXB7, MAGI2, MEF2C, PAX8, PROX1, RARA, RARB, SMAD5, SMAD7, SMARCC1, SOX9, TP63, TP73, ACVR2B, SDC4
GO:0033028	myeloid cell apoptotic process	3.32247e-05	4.00127	13	ARF6, BCL2, CCL5, IRF3, IRF7, PTEN, SELENOS, SIRT1, THRA, ADIPOQ, CDKN2A, EPO, MEF2C
GO:0060759	regulation of response to cytokine stimulus	3.49431e-05	2.18096	35	BIRC2, BIRC3, CASP8, CCL5, F2RL1, GPS2, HIF1A, IKBKB, IRF3, IRF7, JAK1, NR1H3, PIAS1, PPARG, RACK1, RIPK1, RUNX1, STAT1, SUMO1, SYK, TAX1BP1, TRAF2, WNT5A, ADIPOQ, CASP1, CASP4, CD74, CHUK, KLF4, MAP2K5, NOL3, NR1H2, NR1H4, SPHK1, TXK
GO:0071867	response to monoamine	3.66904e-05	3.74208	14	ABL1, APLP1, APP, ATF4, GNB1, MAPK1, MAPK3, PRKACA, RYR2, ADIPOQ, GABPA, NR4A3, PPARGC1A, SIRT2
GO:1902903	regulation of supramolecular fiber organization	3.83074e-05	1.79061	58	ABI2, ABL1, AKAP9, APOE, APP, ARF1, ARF6, ARPC3, CDC42, CDKN1B, DCTN1, EPS8, F2RL1, FLNA, GMFB, GRB2, HDAC6, JMY, MAPT, NF2, PRKCD, PSEN1, RAC1, RB1, RDX, RHOA, SHANK3, SMAD3, SMAD4, SPIRE1, STMN2, TGFBR1, TRIM27, TRIM54, TSC1, FER, ARPIN, CCL26, CFL1, CIB1, CTTN, DLC1, FGF13, MEF2C, MID1, MLST8, MTOR, NCK2, PIK3R1, PPP1R9A, PROX1, SORBS3, CAPZA2, CKAP2, CXCL12, EML2, FHOD3, SDC4
GO:0003205	cardiac chamber development	3.96064e-05	2.16767	35	AP2B1, BMPR2, DSP, FHL2, HAND2, HIF1A, MDM2, NOS3, NOTCH1, PKP2, PRDM1, RXRA, RYR2, SMAD4, SOX4, TGFBR1, WNT5A, ARID1A, CITED2, FOXH1, FZD1, GATA4, GATA6, MAML1, MEF2C, NOTCH2, PAX8, PROX1, RARA, RARB, SAV1, SMAD7, SRF, TNNI1, ZFPM2
GO:0044839	cell cycle G2/M phase transition	4.26042e-05	2.0028	42	AKAP9, APP, ATM, AURKA, BRCA1, BTRC, CALM1, CCNB1, CCND1, CDC6, CDK1, CDK2, CDK4, CHEK1, DCTN1, ENSA, FBXL12, NDE1, NPM1, PAXIP1, PLK1, PRKACA, RBX1, SKP2, TP53, TPX2, YWHAG, CEP192, ATF5, CDKN2B, CEP72, MRE11, MSH6, NBN, NEDD1, RAB11A, RECQL4, YWHAE, CDC25A, MASTL, TUBB, TUBB4B
GO:0051302	regulation of cell division	4.34759e-05	2.1857	34	AURKA, BCL2L1, CALM1, CDC42, CDC6, CUL3, DLL1, ECT2, MYC, NAP1L2, NKX3-1, NUP62, PDGFB, PIN1, PKP4, PLK1, PTN, RACK1, RHOA, SFN, SVIL, TAL1, BECN1, CIB1, FSD1, NCOA3, PAX6, RAB11A, SIRT2, TP63, YBX1, CXCR5, KIF20A, SSTR5
GO:0014823	response to activity	4.62914e-05	2.96899	19	CDK1, CREB1, DNMT3B, HDAC5, HIF1A, MYOG, PPARD, PRKAA1, PRKAA2, PTEN, PTN, RYR2, TNS2, ADIPOQ, MTOR, OXCT1, PPARGC1A, PRKDC, MSTN
GO:0003007	heart morphogenesis	4.79066e-05	1.90953	47	BMPR2, CTNNB1, DLL1, DSP, FHL2, HAND2, HIF1A, JUN, MDM2, NEDD4, NOS3, NOTCH1, PKP2, PSEN1, RXRA, RYR2, SMAD3, SMAD4, SOX4, TGFBR1, WNT5A, CITED2, DKK1, DLC1, FOXH1, FZD1, GAA, GATA4, GATA5, GATA6, MEF2C, MTOR, NOTCH2, PDCD4, PROX1, RARA, RARB, SAV1, SMAD7, SNAI1, SOX9, SRF, TEAD2, TNNI1, TWIST1, ZFPM2, CCDC40
GO:1901522	positive regulation of transcription from RNA polymerase II promoter involved in cellular response to chemical stimulus	4.96788e-05	4.8367	10	ATF4, CREB3, EP300, HIF1A, NOTCH1, RELA, RUNX2, SMAD1, SMAD4, SMAD5
GO:0032200	telomere organization	5.18941e-05	2.22621	32	ATM, ATR, CTNNB1, DCP2, EXOSC10, MAPK1, MAPK3, MYC, PCNA, PML, POLA2, POT1, SRC, TERF1, TERF2, TFIP11, UPF1, XRCC6, APEX1, CCNE1, CCT4, FEN1, HNRNPU, MRE11, NBN, POLD2, PRKDC, RAD50, RECQL4, ZBTB48, CCT8, GNL3
GO:0106027	neuron projection organization	5.32481e-05	2.69223	22	ADAM10, APOE, APP, ARF1, CDC42, CDK5, DCTN1, DLG4, EEF2K, GSK3B, HDAC6, NLGN3, PRNP, PSEN1, PTEN, SHANK3, CFL1, CTNND2, CTTN, EPHB3, PPP1R9A, DBN1
GO:0007159	leukocyte cell-cell adhesion	5.90548e-05	1.78306	56	AKT1, BAD, BCL6, CASP3, CCL5, CDC42, CEBPB, DTX1, ERBB2, EZR, GRB2, HMGB1, IL7R, MAP3K8, MSN, MYB, PDCD1LG2, PDPK1, PPARA, PRKCZ, PRNP, RAC1, RELA, RHOA, RUNX1, RUNX3, SRC, SYK, TRAF6, WNK1, YES1, ZBTB16, CCL2, CCL28, CD74, EFNB2, EPO, ETS1, FOXP3, IRF1, KLF4, NCK2, NR4A3, PAK2, PIK3R1, RARA, SELENOK, SMAD7, STAT5B, ZBTB7B, ZC3H12A, CXCL12, ICOS, IGFBP2, IL23A, SDC4
GO:0016458	gene silencing	5.95524e-05	2.0113	40	AGO2, BAZ2A, CDK2, DDX5, EED, EGFR, ESR1, HDAC1, HDAC5, HMGA1, HMGB1, KMT2B, MBD3L1, MORF4L1, NOTCH4, PABPC1, PPARG, PPP1R8, RAN, SETDB1, SIRT1, SMAD1, SMAD2, SMAD3, SNIP1, STAT3, SUV39H1, TP53, AGO1, ARID1A, DDX17, MAP2K1, MSL3, NCOR1, POLR2G, SIRT2, TNRC6B, ZC3H12A, TARBP2, TNRC6C
GO:0018212	peptidyl-tyrosine modification	6.38703e-05	1.6972	65	ABI1, ABI2, ABI3, ABL1, APP, CCL5, CLK1, DLG4, EGFR, ERBB2, ERBB3, FGFR4, HBEGF, JAK1, MAPK3, MVP, NF2, NRG2, PDGFB, PRKCD, PRKCZ, PRNP, PSEN1, RACK1, SRC, STAT3, STAT5A, STK16, SYK, TAL1, TP53, TSG101, YES1, DYRK4, FER, ADIPOQ, CD40, CD74, CTF1, DOCK3, DYRK2, EFNB2, EPHB3, EPHB6, EPO, ERCC6, FBXW7, FGFR1, MAP2K1, MAP2K4, MAP2K5, MLST8, MTOR, NCK2, PAK2, ROR2, SPINK1, STAT5B, TPST1, TPST2, TTK, U…
GO:0030901	midbrain development	6.38703e-05	2.59569	23	ACTB, CALM1, CDC42, CTNNB1, KAT2A, MBP, RHOA, S100A1, SMAD1, UCHL5, YWHAQ, WNT5A, DKK1, FGFR1, FZD1, NR4A2, OTX2, SIRT2, TFAP2D, YWHAE, YWHAH, ZNF148, CKB
GO:0043900	regulation of multi-organism process	7.03398e-05	1.71591	62	AGO2, APOE, AURKA, BAD, BCL2, BIRC2, BIRC3, CCL5, CHMP2A, DDX5, EP300, F2RL1, GAPDH, GTF2B, HDAC1, HTRA1, JUN, KRT6A, LEF1, MAPK3, MID2, NOTCH1, NR5A2, PABPC1, PAEP, PML, PRKCA, RAD23A, SMARCB1, SNF8, SNW1, SP1, SRPK2, STAT1, TRAF6, TRIM27, TSG101, CCL3, CD74, CFL1, CIB1, CXCL8, ERCC6, ILF3, PLSCR1, PPIH, PROX1, SELENOK, SIRT2, SPINK1, TRIM21, VIP, ZC3H12A, CHD1, FCN1, IL23A, LBP, MX1, PPIE, PPM1…
GO:0043627	response to estrogen	7.50774e-05	2.78276	20	ARID5A, BRCA1, CCND1, EP300, ESR1, KRT19, MAPK1, MDM2, PPARG, ASH2L, CITED1, CITED2, CITED4, CTNNA1, EPO, GATA6, PELP1, RARA, IGFBP2, MSTN
GO:0030902	hindbrain development	7.70953e-05	2.18138	32	ABL1, BCL2, CDK5, CRK, CTNNB1, DLL1, EZH2, FLNA, GATA2, KAT2A, LEF1, PTBP2, PTN, SMAD1, ASCL1, ATF5, DAB1, DLC1, HERC1, HOXB1, HOXB2, HOXB3, MAP2K1, NEUROD1, PPARGC1A, PROX1, RBFOX2, RORA, WHRN, CKB, GART, OGDH
GO:0032069	regulation of nuclease activity	7.87007e-05	4.61685	10	AKT1, HMGB1, NPM1, PCNA, PRKCD, SIRT1, TERF1, TERF2, HMGB2, TMBIM6
GO:0031099	regeneration	8.38435e-05	2.04245	37	AURKA, BCL2, CCNB1, CCND1, CDK1, CDK4, CDKN1B, CEBPB, CSNK2B, DAG1, EGFR, EZH2, GFAP, HAMP, JUN, MYOG, NEFL, NOTCH1, PCNA, PPARD, PPARG, PTEN, SPP1, UPF2, CTNNA1, KLF4, MAP2K1, MYOD1, NR4A3, PTPN3, SRSF5, CXCL12, MSTN, RPL19, TARBP2, TSPO, UGT1A1
GO:0099177	regulation of trans-synaptic signaling	8.94122e-05	1.65631	68	ABL1, ADRB2, AKAP9, APOE, APP, ARF1, BACE1, CACNA1A, CALM1, CDH1, CDK5, CELF4, CREB1, DLG4, EGFR, EIF4A3, GFAP, GLUL, GSK3B, KAT2A, MAPK1, MAPK8IP2, MAPT, NLGN3, NPTX1, NPTX2, NPTXR, PLAT, PRKACA, PRKCZ, PRNP, PSEN1, PTEN, PTN, RAB3A, RAP1B, SHANK3, SRC, STAT3, STX1B, VPS18, YWHAG, ADIPOQ, APBA1, DKK1, DTNBP1, EIF4EBP2, GRID2IP, GUCY1A1, GUCY1B1, MEF2C, MTOR, PLK2, PPP1R9A, PRKCB, RAB11A, RARA, R…
GO:0051702	interaction with symbiont	9.10648e-05	2.74515	20	APOE, CALM1, CCL5, EP300, F2RL1, FN1, GAPDH, GTF2B, HDAC1, JUN, LEF1, PLG, SMARCB1, SNW1, SP1, AQP1, CCL3, CFL1, ZC3H12A, CHD1
GO:0061564	axon development	9.81758e-05	1.59611	77	ABL1, APOE, APP, ARHGDIA, ATL1, BCL2, BMPR2, CASP3, CDK5, CDKL3, CREB1, CRMP1, DAG1, ERBB2, ETV1, EZR, FN1, GRB2, GRB7, GSK3B, HDAC6, JUN, L1CAM, MAPK1, MAPK3, MAPT, NEFL, NKX2-1, NLGN3, NOTCH1, NPTX1, PRKCA, PSEN1, PTEN, RAB3A, RHOA, RPS6KA5, SHANK3, SHC3, SKIL, SMAD4, SPP1, SRC, TRPC5, WNT5A, AUTS2, CTNNA1, CTTN, DAB1, DOK5, EFNB2, EMB, EPHB3, FGF13, GDI1, IRS2, KLF4, LHX2, MAP2K1, NR4A2, NR4A3…
GO:0006401	RNA catabolic process	0.000102637	1.72759	58	AGO2, AKT1, ATM, CARHSP1, DCP1A, DCP2, DDX5, E2F1, EIF4A3, ERN1, EXOSC10, FXR2, HSPB1, MAPK14, MLH1, MTPAP, NPM1, PABPC1, PAN2, PAN3, PATL1, PPP1R8, PRKCA, PRKCD, RBM10, RPL5, SYNCRIP, UBC, UPF1, UPF2, VIM, YWHAB, YWHAZ, AGO1, APEX1, CNOT4, DCP1B, DEDD2, FEN1, HNRNPU, MTOR, PKP3, POLR2G, RPL23A, RPL27, RPS15, SET, SMG9, TNRC6B, VIP, YBX1, ZC3H12A, PYM1, RPL19, RPS24, RPS4Y1, SERBP1, TNRC6C
GO:0048017	inositol lipid-mediated signaling	0.000102793	2.09297	34	AKT1, CCL5, EGFR, ERBB2, ERBB3, EZR, F2RL1, IRS1, MAPK1, MAPK3, NEDD4, NKX3-1, PDGFB, PLD2, PPARD, PPP2R5C, PTEN, RHOA, RPS6KB1, SIRT1, SRC, STAMBP, BECN1, EPO, FGFR1, IRS2, KLF4, PIK3R1, PRR5, SIRT2, SOX9, TSC2, TWIST1, UNC5B
GO:1904019	epithelial cell apoptotic process	0.000102793	2.46232	24	ABL1, ARF6, BAD, BCL2L1, BMPR2, E2F1, EXOC5, FOXO3, GATA2, KRT18, PDPK1, PRKCI, RB1, RYR2, TCF7L2, TNIP2, CCL2, CD40, MAP3K5, MTOR, NEUROD1, PDCD4, PPARGC1A, THBS1
GO:0060326	cell chemotaxis	0.00011357	1.79242	51	ACKR2, ADAM10, CCL15, CCL16, CCL5, CCL7, CCL8, CREB3, CRK, CXADR, F2RL1, HBEGF, HMGB1, HOXB9, HSPB1, LEF1, MAPK14, MAPK3, NOTCH1, NR4A1, OXSR1, PDGFB, PRKCD, RAC1, SYK, WNK1, CCR1, WNT5A, CALCA, CCL14, CCL2, CCL23, CCL26, CCL28, CCL3, CCR4, CCR9, CD74, CXCL8, FGFR1, HMGB2, MPP1, CCL13, CXCL12, CXCR5, FOLR2, IL23A, LBP, MSTN, P2RX4, THBS1
GO:0009266	response to temperature stimulus	0.000114288	1.97077	39	ADRB2, AKT1, ATM, ATR, ATXN3, CASP8, CREBBP, EP300, ERO1A, FOS, FOXO1, GSK3B, MAPK1, MAPK3, MAPT, NFKBIA, NOS3, NR2F6, PPARG, PRKAA1, PRKACA, RPS6KB1, SIRT1, SUMO1, THRA, VCP, RPTOR, SLC12A5, BAG3, CALCA, CHORDC1, MLST8, MTOR, PPARGC1A, TGFB1I1, YWHAE, CXCL12, MSTN, THBS1
GO:0048872	homeostasis of number of cells	0.000120284	1.86558	45	ABL1, AKT1, ARNT, BCL2, BCL6, CASP3, CDK6, EXOC5, EZH2, FOXO3, GATA2, HIF1A, HMGB1, HOXB6, IL7R, KLF1, MAPK14, NOS3, NOTCH1, POLB, PRMT1, RB1, SKIL, SP3, STAT1, STAT3, TAL1, THRA, CCR4, CD74, EPAS1, EPO, ETS1, FOXP3, HMGB2, KLF13, KLF2, MEF2C, NCSTN, RBFOX2, SMAD5, SOX9, SRF, STAT5B, RPS24
GO:0034976	response to endoplasmic reticulum stress	0.000129342	1.81918	48	ATF4, ATXN3, BAG6, BCL2, BCL2L1, CCND1, CEBPB, COPS5, CREB3, DCTN1, EP300, ERN1, ERO1A, GORASP2, GSK3B, JUN, LMNA, PML, RACK1, SEC13, SELENOS, SGTA, SIRT1, STT3B, TNFRSF10B, TP53, TRAF2, UBQLN1, VCP, CASP4, CCL2, CXCL8, CXXC1, DDIT3, EEF2, HERPUD1, MAP3K5, NCK2, NRBF2, PIK3R1, SELENOK, TMX1, UBQLN2, USP19, ZBTB17, DNAJB12, THBS1, TMBIM6
GO:0071897	DNA biosynthetic process	0.000129989	1.999	37	ATM, ATR, BMPR2, CTNNB1, DCP2, EXOSC10, FGFR4, MAPK1, MAPK3, MYC, PCNA, PDGFB, POLA2, POLB, POT1, PPARG, SIRT1, SRC, TERF1, TERF2, TK1, TOM1L1, TP53, UBC, VCP, ADIPOQ, CCT4, CDKN2D, DDX39B, HNRNPU, KLF4, MRE11, POLD2, POLI, RAD50, CCT8, REV1
GO:0040013	negative regulation of locomotion	0.000136521	1.74676	54	AKT1, APOE, BCL2, CDH1, CRK, CSNK2B, DAG1, FOXO3, HDAC5, HMGB1, JUP, MID2, MITF, NF2, NKX2-1, NOTCH1, PIN1, PML, PPARD, PPARG, PTEN, PTN, RECK, RHOA, RNF41, STAT3, SYNJ2BP, TRIM27, CYGB, WNT5A, ADIPOQ, APEX1, ARPIN, CCL2, CCL28, CITED2, CTNNA1, DLC1, KLF4, KRT16, MAGI2, MAP2K5, MEF2C, MEOX2, NR2F2, PPARGC1A, SMAD7, SPRED1, SRF, TRIM21, CXCL12, PTPRG, SEMA6A, THBS1
GO:0045785	positive regulation of cell adhesion	0.000140944	1.6583	64	ABL1, AKT1, APBB1IP, ATM, BAD, BCL6, CCL5, CDC42, CDK6, CRK, DAG1, ERBB2, FLNA, FN1, FOXA2, GRB2, GSK3B, HMGB1, IL7R, JUP, MAP3K8, MYB, PDCD1LG2, PDPK1, PRKCA, PRKCZ, PTN, RAC1, RELA, RHOA, RUNX1, RUNX3, SMAD3, SRC, SYK, TRAF6, TSC1, YES1, ZBTB16, WNT5A, CCL2, CCL28, CD74, CIB1, CITED2, EFNB2, EPO, ETS1, FOXP3, NCK2, NR4A3, PAK2, PIK3R1, RARA, SELENOK, SMAD7, STAT5B, ZBTB7B, CXCL12, ICOS, IGFBP2,…
GO:0060249	anatomical structure homeostasis	0.000142796	1.64305	66	ACTB, ADRB2, ANKRD11, ATM, ATR, BARD1, BCL2, CDK5, CTNNB1, CXADR, DCP2, DCTN1, EGFR, EXOC5, EXOSC10, GATA2, HIF1A, HSPB1, KRT1, MAPK1, MAPK3, MYC, NOS3, NOTCH1, PCNA, PML, POLA2, POT1, PRKAA1, PRKCA, RAC1, RB1, SPP1, SRC, SYK, TERF1, TERF2, TFIP11, TRAF6, UPF1, XRCC6, APEX1, BAG3, CALCA, CCNE1, CCT4, EPAS1, ERCC6, FEN1, GAA, HNRNPU, MRE11, NBN, NEUROD1, POLD2, PRKDC, RAD50, RECQL4, SOX9, SRF, WHR…
GO:0031050	dsRNA processing	0.000143461	3.17408	15	AGO2, DDX5, EGFR, ESR1, PPP1R8, SMAD1, SMAD2, SMAD3, SNIP1, TP53, AGO1, MAP2K1, NCOR1, ZC3H12A, TARBP2
GO:0045088	regulation of innate immune response	0.000144822	1.67908	61	A2M, APOE, BIRC2, BIRC3, CARD9, CASP8, CCL5, CREBBP, CRK, EP300, ERBIN, ESR1, F2RL1, GPS2, HMGB1, IKBKB, IRF3, IRF7, JAK1, MARCO, MUC1, NFKB1, NFKBIA, NR1H3, PDPK1, PIAS1, PPARG, PRKACA, PRKCD, RELA, RIPK1, RPS6KA5, S100A1, SRC, STAT1, SUMO1, SYK, TNIP2, TRAF6, UBC, UBQLN1, XRCC6, WNT5A, CHUK, HMGB2, IRF1, NR1H2, NR1H4, PAK2, PLSCR1, POLR3C, POLR3D, PRKDC, STAT5B, TIFA, CLEC4A, FCN1, LBP, POLR3B,…
GO:0043588	skin development	0.000152114	1.63904	66	BCL2, CASP3, CTNNB1, DLL1, DSC2, DSC3, DSG1, DSG2, DSP, EGFR, FLNB, HDAC1, JUP, KRT1, KRT13, KRT15, KRT18, KRT19, KRT31, KRT40, KRT5, KRT6A, KRT6B, KRTAP10-3, NOTCH1, PKP2, PKP4, PSEN1, RELA, RUNX1, SFN, SMAD4, ST14, TSG101, WNT5A, CDSN, DKK1, FOSL2, HOXC13, KRT16, KRT17, KRT25, KRT26, KRT27, KRT28, KRT35, KRT36, KRT38, KRTAP11-1, LCE1C, LCE1F, LCE3A, LHX2, MAP2K1, NCOA3, PAX6, PKP3, SAV1, SNAI1,…
GO:0032970	regulation of actin filament-based process	0.00015328	1.68349	60	ABI2, ABL1, AKAP9, ARF1, ARF6, ARHGDIA, ARPC3, CDC42, CDK5, CRK, DSC2, DSG2, DSP, ECT2, EPS8, EZR, F2RL1, FLNA, GMFB, GRB2, JMY, JUP, NF2, PKP2, PRKCD, RAC1, RDX, RHOA, RYR2, SHANK3, SMAD3, SMAD4, SPIRE1, SUMO1, TGFBR1, TRIM27, TSC1, CTNNA3, FER, ARPIN, CCL26, CFL1, CTTN, DLC1, FGF13, GATA4, MEF2C, MLST8, MTOR, NCK2, PIK3R1, PPP1R9A, PROX1, SORBS3, CAPZA2, CXCL12, FHOD3, KCNJ2, RND1, SDC4
GO:0035821	modification of morphology or physiology of other organism	0.000159151	2.09694	32	APOE, BAD, BCL2L1, CALM1, CASP8, CCL5, DAG1, EP300, F2RL1, GAPDH, GTF2B, HAMP, HDAC1, HMGN2, JUN, KPNA2, KRT6A, LEF1, PLG, RXRA, SMAD3, SMARCB1, SNW1, SP1, AQP1, CCL3, CFL1, LCE3A, RRAGA, ZC3H12A, CCL13, CHD1
GO:0051271	negative regulation of cellular component movement	0.000161218	1.75471	52	ACTN1, AKT1, APOE, BCL2, CDH1, CDKN1B, CRK, CSNK2B, DAG1, FOXO3, HDAC5, HMGB1, JUP, MITF, NF2, NKX2-1, NOTCH1, PIN1, PPARD, PPARG, PTEN, PTN, RECK, RHOA, RNF41, STAT3, SYNJ2BP, CYGB, WNT5A, ADIPOQ, APEX1, ARPIN, CCL2, CCL28, CITED2, CTNNA1, DLC1, KLF4, KRT16, MAGI2, MAP2K5, MEF2C, MEOX2, NR2F2, PPARGC1A, SMAD7, SPRED1, SRF, CXCL12, PTPRG, SEMA6A, THBS1
GO:0001503	ossification	0.000166508	1.67003	61	ADRB2, AKT1, BCL2, BMPR2, CDK6, CEBPB, CLTC, CTNNB1, DDX5, EGFR, FHL2, HAND2, HIF1A, JUNB, LEF1, MAPK1, MAPK14, MAPK3, MEF2D, MYOG, NAB2, NOTCH1, PRKACA, PTN, RHOA, RUNX2, SMAD1, SMAD3, SP3, SPP1, SYNCRIP, TFAP2A, THRA, TRAF6, ZBTB16, CCR1, WNT5A, CALCA, CCL3, CEBPA, CITED1, DKK1, ESRRA, FAM20C, FZD1, HEMGN, HNRNPU, JUND, MEF2C, MN1, ROR2, RPS15, SMAD5, SNAI1, SOX9, TOB2, TP63, TWIST1, ACVR2B, DD…
GO:0048857	neural nucleus development	0.000175654	2.87783	17	ACTB, BCL2, CALM1, CDC42, MBP, NKX2-1, RHOA, S100A1, YWHAQ, ASCL1, HOXB1, HOXB2, SIRT2, YWHAE, YWHAH, ZNF148, CKB
GO:0061448	connective tissue development	0.000188533	1.80144	47	BMPR2, CARM1, CDK4, CTNNB1, HAND2, HIF1A, MAF, MAPK14, MAPK3, MEF2D, NOTCH1, PAXIP1, PDGFB, PPARD, RARG, RELA, RUNX2, RUNX3, SIRT1, SMAD1, SMAD3, TGFBR1, THRA, ZBTB16, ZEB1, SERPINB7, WNT5A, ACTA2, ALX1, EGR1, ESRRA, FGFR1, HOXB3, MEF2C, NR1H4, OXCT1, PITX1, PPARGC1A, RARA, RARB, ROR2, SMAD5, SNAI1, SOX9, SRF, CHI3L1, POC1A
GO:0007548	sex differentiation	0.000206671	1.79467	47	AR, BCL2, BCL2L1, CASP3, CCND1, CEBPB, CTNNB1, ESR1, FLNA, FOXO3, KMT2B, NKX2-1, NKX3-1, NOS3, NR5A1, PGR, SGPL1, SIRT1, SMAD4, SRC, SRD5A2, TEX11, TGFBR1, WNT5A, ARID4B, CITED2, CTNNA1, DMC1, DMRT3, GATA4, GATA6, HMGB2, HNF4A, HOXA10, ING2, NUPR1, PATZ1, RARA, ROR2, SMAD5, SOX9, SRY, STAT5B, TMF1, TP63, ZFPM2, HSD17B4
GO:0032386	regulation of intracellular transport	0.000214874	1.61261	67	ARF1, ATP13A2, BACE1, BARD1, CALM1, CDC42, CDH1, CDK1, CDK5, ECT2, ERBB2, EZR, FLNA, GAS1, GATA2, GSK3B, JUP, MAPK1, MAPK14, MAPK3, MDM2, MSN, NEDD4, NUP62, PDPK1, PDZK1, PPP1CC, PRKAA1, PRKACA, PRKCD, PRNP, PSEN1, RAB3A, RANGAP1, RAP1B, RDX, SFN, SIRT1, SMAD3, SRC, SREBF2, STX1B, SYK, TCF7L2, TP53, TXN, VPS18, FER, ADIPOQ, APBA1, BAG3, CIB1, DTNBP1, FBXW7, FZD5, GDI1, HDAC3, MAP2K1, PIK3R1, PRKC…
GO:0045445	myoblast differentiation	0.000219614	2.50939	21	DDX5, DLL1, MAPK14, MYOG, NOTCH1, PPARD, RB1, TCF7L2, DDIT3, DDX17, EID2B, EPAS1, MAML1, MAP3K5, MEF2C, MYOD1, PITX1, SOX9, SRF, TRIP4, MSTN
GO:0009410	response to xenobiotic stimulus	0.000220585	1.76488	49	ACY3, AHR, ARNT, CALM1, CDK5, CYP2C18, CYP2C8, DNMT3B, E2F1, EGFR, EIF4EBP1, FOXO1, FOXO3, GJB2, HDAC5, MDM2, NR1I2, NR3C1, PCNA, PDGFB, PPARG, PRKAA1, RB1, RELA, RGS2, RPS6KB1, RYR2, SRD5A2, STAT5A, AQP1, EGR1, EPO, FOSB, HNF4A, MTOR, NR4A2, PCK2, PPARGC1A, RORA, STAT5B, SULT1A2, TRDMT1, CES2, CPS1, MSTN, NQO1, SLC6A1, UGT1A1, UGT1A3
GO:0009895	negative regulation of catabolic process	0.000220585	1.76488	49	AKT1, ATP13A2, BAG6, BANP, BCL2, CSNK2A1, E2F1, EGFR, FLNA, GOLGA2, MAPK14, MYOG, PABPC1, PIN1, PML, PPARA, PRKAA1, PSEN1, RBM10, RELA, RNF41, RPL5, SGTA, SMAD3, STAT3, SYNCRIP, TSC1, UBQLN4, UCHL5, BECN1, GATA4, HERC1, HNRNPU, MCL1, MDM4, MTOR, PKP3, PPARGC1A, PTPN3, QSOX1, RRAGA, SIRT2, SMARCC1, TSC2, USP19, VIP, YBX1, TSPO, USP36
GO:0003013	circulatory system process	0.000236756	1.56588	74	ADRB2, AKAP9, AKT1, APOE, AR, ATP2A3, BMPR2, CALM1, CXADR, CYB5R3, DLL1, DSC2, DSG2, DSP, EGFR, F2RL1, FLNA, HBEGF, JUP, MDM2, MEF2A, NOS3, PDGFB, PKP2, PPARA, PPARD, PPARG, PRKACA, RGS2, RHOA, RYR2, S100A1, SMAD3, SNTA1, SRC, STAT1, SUMO1, THRA, THRB, WNK1, YES1, CTNNA3, ACTA2, ADIPOQ, BDKRB2, CALCA, CYP11B2, EPAS1, EPO, GAA, GATA4, GUCY1A1, GUCY1B1, HOXB2, MEOX2, MTOR, NCALD, NR2F2, POMC, SCN1A…
GO:0003170	heart valve development	0.000252316	2.90202	16	BMPR2, MDM2, NOS3, NOTCH1, PRDM1, RB1, SMAD4, SOX4, GATA4, GATA5, MEF2C, MTOR, NOTCH2, SNAI1, SOX9, TWIST1
GO:0010498	proteasomal protein catabolic process	0.000258368	1.58351	70	AKT1, APOE, ARAF, ARNTL, ATXN3, AURKA, BAG6, BIRC2, BTRC, CCNB1, CDK1, CDK2, CLOCK, CSNK1A1, CUL3, CUL4B, FAF1, FBXL12, FBXL5, GSK3B, KAT5, KCTD17, MAPK9, MDM2, NEDD4, PIAS1, PLK1, PML, PPP2R5C, PRKACA, PSEN1, PSMB9, RACK1, RAD23A, RBX1, RNF41, SEC13, SELENOS, SGTA, SIRT1, SKP2, STT3B, SUMO1, SUMO2, UBC, UBE2D1, UBE2I, UBQLN1, UBQLN4, UCHL5, VCP, CEBPA, DDIT3, FBXW7, HERPUD1, KCTD5, PLK2, PSMA5, …
GO:0045995	regulation of embryonic development	0.000260691	2.19393	27	AR, BAG6, CDK1, CTNNB1, DAG1, DLL1, FOXA2, GATA2, MBP, NOTCH1, PRKACA, RACK1, TDG, WNK1, WNT5A, ADIPOQ, CDX2, DKK1, FGFR1, FZD1, HNF4A, KLF4, MAP2K5, OTX2, SNAI1, GCM1, TGIF2
GO:0019080	viral gene expression	0.000263858	2.785	17	CCL5, EP300, GTF2B, HDAC1, JUN, LEF1, MID2, PTBP1, SMARCB1, SNW1, SP1, TRIM27, CCL3, TRIM21, USF2, CHD1, TARBP2
GO:1902850	microtubule cytoskeleton organization involved in mitosis	0.000268174	2.15453	28	AURKA, CCNB1, CHMP2A, CLTC, DCTN1, FLNA, GOLGA2, NDE1, NUP62, PLK1, RAN, RHOA, SPRY2, TPX2, VCP, CEP192, FSD1, HNRNPU, MSTO1, MYBL2, MZT1, PAX6, PLK2, PTPA, RAB11A, TACC2, TTK, POC1A
GO:1904837	beta-catenin-TCF complex assembly	0.00028168	3.72426	11	CREBBP, CTNNB1, DACT1, EP300, HDAC1, KAT5, LEF1, MYC, TCF7L2, TLE1, ASH2L
GO:0050878	regulation of body fluid levels	0.00028168	1.55615	74	A2M, ACTB, ACTN1, APOE, CCND1, CDC42, CREB1, F2RL1, FLNA, FOXA2, GATA2, GNB1, HDAC1, HIF1A, HSPB1, IRF2, KDM1A, KRT1, MAPK1, MAPK3, MYL9, NME1, NOS3, NR1H3, PDGFB, PDPK1, PLAT, PLAU, PLG, PRKACA, PRKCA, PRKCD, RAC1, RBSN, SFN, SRC, STAT5A, SYK, WNK1, YWHAZ, AQP1, CD40, CYP11B2, DTNBP1, GATA4, GATA5, GATA6, GNA14, HNF4A, HPS6, IRF1, KRT16, NR1H2, PIK3R1, PLSCR1, PRKCB, RAB11A, SRF, STAT5B, TP63, U…
GO:0007051	spindle organization	0.000310643	1.97337	34	AURKA, CCNB1, CHD3, CHMP2A, CLTC, DCTN1, EZR, FLNA, GOLGA2, MLH1, NEK6, NUP62, PLK1, RAN, RHOA, TPX2, VCP, CEP192, CEP72, FSD1, HDAC3, HNRNPU, MAPRE2, MSTO1, MYBL2, MZT1, NCOR1, PLK2, PTPA, RAB11A, TACC2, TTK, POC1A, TUBB
GO:0090287	regulation of cellular response to growth factor stimulus	0.000314922	1.78542	45	ABL1, ARNT, BMPR2, CREBBP, CTNNB1, DLL1, EID2, EP300, HGS, HIF1A, HTRA1, NEDD4, NKX2-1, NOTCH1, PDPK1, PIN1, RUNX2, SIRT1, SKIL, SMAD2, SMAD3, SMAD4, SNW1, SPRY2, TGFBR1, UBC, ZEB1, WNT5A, CDKN2B, CITED1, CITED2, DKK1, DOK5, FAM20C, FGFR1, FZD1, GATA4, ING2, OTX2, PRKCB, SMAD7, TGFB1I1, JCAD, SEMA6A, THBS1
GO:0038034	signal transduction in absence of ligand	0.000324251	2.64967	18	AKT1, BAD, BCL2, BCL2L1, CASP3, ERBB3, FOXO3, GSK3B, PPP1CA, RIPK1, BAG3, CTNNA1, FGFR1, LCN2, MAP2K5, MCL1, ZC3HC1, UNC5B
GO:0033500	carbohydrate homeostasis	0.000327658	1.82306	42	AKT1, BAD, ERN1, FGFR4, FOXA2, FOXO1, FOXO3, HIF1A, HNF1A, IRS1, MLXIPL, NME1, PPARG, PRKAA1, PRKAA2, PRKACA, RACK1, SIRT1, SMARCB1, SOX4, STAT3, TCF7L2, ADIPOQ, CEBPA, GATA4, HNF4A, IRS2, NCOA5, NEUROD1, NR1H4, OXCT1, PAX6, PCK2, PIK3R1, POMC, PPARGC1A, SRF, UBTF, BAIAP3, GPR27, PDK2, SSTR5
GO:0050817	coagulation	0.000337212	1.68246	54	A2M, ACTB, ACTN1, APOE, CDC42, F2RL1, FLNA, FOXA2, GATA2, GNB1, HDAC1, HSPB1, IRF2, KDM1A, KRT1, MAPK1, MAPK3, MYL9, NOS3, PDGFB, PDPK1, PLAT, PLAU, PLG, PRKACA, PRKCA, PRKCD, PSEN1, RAC1, RBSN, SRC, SYK, YWHAZ, CD40, DTNBP1, GATA4, GATA5, GATA6, GNA14, HNF4A, HPS6, IRF1, PIK3R1, PLSCR1, PRKCB, SRF, ZFPM2, CAPZA2, F2RL2, P2RX4, TFPI2, THBS1, TSPAN32, VWF
GO:0008380	RNA splicing	0.000444914	1.58324	65	BCAS2, CDC5L, CELF4, CLK1, DDX5, EIF4A3, ERN1, GTF2F2, HNRNPK, IK, KDM1A, NUDT21, NUP98, PABPC1, PCBP1, PPP1R8, PRPF3, PTBP1, PTBP2, RBM10, RBM15B, RBPMS, SMN1, SNRPA, SNW1, SRPK2, SYNCRIP, TFIP11, WBP11, CTNNBL1, HNRNPLL, BUD31, CSTF2, CWC15, DDX17, DDX39A, DDX39B, ELAVL2, HNRNPU, HNRNPUL1, KHDRBS2, LUC7L, MYOD1, NOL3, NSRP1, PIK3R1, POLR2G, PPARGC1A, PPIH, RBFOX2, SCAF11, SRSF11, SRSF5, TGS1, T…
GO:0051051	negative regulation of transport	0.000456792	1.55239	70	AKT1, APP, ARF6, ATF4, ATXN2, BARD1, BCL2, CALM1, CDK5, DLG4, ERBB3, EZR, F2RL1, FN1, GEM, GNB5, GOPC, HAMP, HMGB1, IRS1, NEDD4, NFKB1, NOS3, NOTCH1, NR1H3, OXSR1, PML, PSEN1, PTEN, RAC1, RACK1, RANGAP1, RAP1B, RGS2, SELENOS, SREBF2, STX1B, SUMO1, TRIM27, TXN, UBQLN1, WNK1, YWHAQ, ADIPOQ, BAG3, CD74, EPO, FOXP3, GDI1, IRS2, MTOR, NR1H2, NR1H4, PPP1R9A, PRKCB, SPINK1, SREBF1, TWIST1, UBQLN2, UNC11…
GO:0070741	response to interleukin-6	0.000508691	3.29418	12	FOXA2, HAMP, JAK1, NFKB1, RELA, SMAD4, STAT1, STAT3, FER, CITED1, PPARGC1A, CHI3L1
GO:0007498	mesoderm development	0.000557383	2.12971	26	BMPR2, IKZF3, LEF1, NF2, PRKACA, SMAD1, SMAD2, SMAD3, SMAD4, TAL1, WNT5A, CITED2, DKK1, ETS2, FGFR1, FOXH1, KLF4, LHX2, NR4A3, SNAI1, SRF, TBX6, TEAD2, TP63, ZFPM2, ACVR2B
GO:0046683	response to organophosphorus	0.000571687	2.06085	28	AHR, AKAP9, APP, BIRC2, CARM1, EEF2K, EZR, FOS, JUN, JUNB, KDM1A, NME1, PLA2G5, PTEN, RAP1B, RELA, STAT1, FDX1, ADIPOQ, APEX1, AQP1, CITED1, FOSB, FOSL1, JUND, SREBF1, CPS1, P2RX4
GO:0051291	protein heterooligomerization	0.000595796	2.19612	24	BIRC2, BIRC3, CHMP2A, GNB1, GRB2, HBA1, JUP, KRT1, NUDT21, NUP62, PCBD1, PRKAA1, PRKCZ, RIPK1, TRAF2, TSC1, WIZ, XRCC6, YWHAB, ADIPOQ, CD74, CTNNA1, MAGI2, LIMS1
GO:0001818	negative regulation of cytokine production	0.000607028	1.74575	44	BCL6, DLL1, ERBIN, EZR, F2RL1, FN1, HMGB1, IRF3, KAT5, LEF1, NFKB1, PDCD1LG2, PIN1, PML, PRNP, RAC1, REL, RPS6KA5, SELENOS, TAX1BP1, TRIM27, YY1, ADIPOQ, BCL3, FGFR1, FOXP3, GATA6, KLF2, KLF4, MAP2K5, NR1H4, PDCD4, POMC, RARA, SMAD7, TWIST1, ZC3H12A, CLEC4A, IL23A, LBP, PPM1B, THBS1, TLR8, TSPO
GO:0072593	reactive oxygen species metabolic process	0.000607028	1.74575	44	AKT1, BCL2, BIRC2, BRCA1, DDAH2, EGFR, F2RL1, FOXO1, FOXO3, GRB2, HBA1, HDAC6, HIF1A, MAPK14, MAPT, NOS3, NOXA1, PDGFB, PRDX2, PRKCD, RAC1, RHOA, RIPK1, RNF41, SELENOS, SMAD3, STAT3, SYK, TFAP2A, TP53, BECN1, KLF2, KLF4, MTOR, RORA, SIRT2, ZC3H12A, CPS1, GNAI2, MPV17L, NQO1, P2RX4, THBS1, TSPO
GO:0001763	morphogenesis of a branching structure	0.000607028	1.86558	36	ABL1, AR, BCL2, BTRC, CTNNB1, DAG1, ESR1, GRB2, LEF1, MAGED1, MYC, NKX2-1, NKX3-1, NOTCH1, NOTCH4, PGR, PML, PPP1CA, PRDM1, RXRA, SMAD4, SPRY2, SRC, ST14, WNT5A, CITED1, FGFR1, FZD5, HOXB7, PAX8, PROX1, SOX9, SRF, TP63, VDR, GCM1
GO:0048706	embryonic skeletal system development	0.000623278	2.11267	26	CTNNB1, EIF4A3, HOXB6, HOXB9, MDFI, RUNX2, SMAD2, SMAD3, SP3, TFAP2A, TGFBR1, ZEB1, WNT5A, ALX1, HOXA1, HOXB1, HOXB2, HOXB3, HOXB4, HOXB7, HOXD10, HOXD4, MEF2C, PAX5, TWIST1, MBTD1
GO:0021700	developmental maturation	0.000693593	1.71145	46	APP, AURKA, BCL2, CCNB1, CTNNB1, DAG1, DLG4, FOXO3, GATA2, HIF1A, KDM1A, MTCH1, NEFL, PAEP, PGR, PPARG, PRKACA, PTEN, RAB3A, RB1, RECK, RHOA, RUNX2, TAL1, TRIP13, YWHAZ, WNT5A, ASCL1, CEBPA, DDIT3, DMC1, EPAS1, EPO, FAM20C, FGFR1, FZD5, KLF2, MTOR, NR4A2, SIRT2, SPINK1, TBX6, ANAPC2, BAIAP3, CDH5, RND1
GO:0048645	animal organ formation	0.000693593	2.66415	16	AR, CTNNB1, HAND2, MAPK1, MAPK3, WNT5A, CITED2, DKK1, FGFR1, FOXH1, GATA5, GATA6, MAP2K1, MEF2C, PAX8, TP63
GO:0010959	regulation of metal ion transport	0.00071555	1.6082	57	ABL1, ADRB2, AKAP9, AKT1, ARF1, ATF4, BCL2, CALM1, CCL5, CTNNB1, FLNA, GEM, GNB5, HAMP, NEDD4, NOS3, OXSR1, PDGFB, PDPK1, PKP2, PML, PRKACA, PRNP, PTEN, RHOA, RYR2, S100A1, SNTA1, SUMO1, TRIM27, UBQLN1, WNK1, CCR1, CCL2, CCL3, EPO, KCNIP1, KCNIP3, KCNIP4, PTPN3, SPINK1, VIP, YWHAE, YWHAH, CLIC2, CXCL12, GNAI2, JPH2, KCNA1, KCNJ2, KCNN2, MCHR1, P2RX4, PRSS8, SLMAP, TMBIM6, TSPO
GO:0052547	regulation of peptidase activity	0.000792716	1.55515	64	A2M, AKT1, APP, ATP13A2, BAD, BEX3, BIRC2, BIRC3, CASP10, CASP3, CASP8, CSNK2A1, CYCS, FN1, GAPDH, HMGB1, ITIH3, LEF1, MAPK14, MAPK3, MAPT, MBP, MDM2, MGMT, MTCH1, MYC, NKX3-1, PML, PPARG, PSMB9, RACK1, RECK, RHOA, RIPK1, SFN, SIRT1, SMAD3, SRC, STAT3, TNFAIP8, TNFRSF10B, TRAF2, UCHL5, VCP, NRDC, RPS6KA1, SERPINB7, AQP1, CASP1, CASP4, CDKN2D, DLC1, HERPUD1, KLF4, MAP2K5, MAP3K5, NOL3, PAK2, SPINK…
GO:0048736	appendage development	0.000814488	1.89369	33	BMPR2, CREBBP, CTNNB1, HAND2, HDAC1, KAT2A, KAT2B, LEF1, NOTCH1, PSEN1, RARG, RECK, RUNX2, SMAD4, SOX4, TFAP2A, ZBTB16, WNT5A, ALX1, DKK1, FGFR1, HOXA10, HOXC13, HOXD10, MEOX2, NR2F2, PITX1, RARA, RARB, ROR2, SOX9, TP63, TWIST1
GO:0050890	cognition	0.000822941	1.68686	47	APOE, APP, ATXN1, CASP3, CDK5, CEBPB, CREB1, DLG4, EGFR, EIF4A3, FOS, GMFB, HIF1A, IFT20, JUN, KAT2A, KMT2B, MAPK1, MAPK8IP2, MAPT, NLGN3, NPTX2, PIAS1, PRKCZ, PRNP, PSEN1, PTEN, PTN, RPS6KB1, SHANK3, SHC3, THRA, SLC12A5, DKK1, EIF4EBP2, FEN1, FGF13, FOSL1, HOXA1, MEF2C, MTOR, PLK2, RIN1, SRF, VIP, NTAN1, SLC6A1
GO:0140112	extracellular vesicle biogenesis	0.000956613	3.8089	9	ATP13A2, CHMP2A, COPS5, HGS, SNF8, TSG101, RAB11A, ARRDC4, SDC4
GO:0006397	mRNA processing	0.000958952	1.50166	72	APP, BARD1, BCAS2, CCNB1, CDC5L, CELF4, DDX5, EIF4A3, ERN1, GTF2F2, HNRNPK, IK, KDM1A, MTPAP, NUDT21, NUP98, PABPC1, PAF1, PAN2, PAN3, PCBP1, POLDIP3, PPP1R8, PRKACA, PRPF3, PTBP1, PTBP2, RBM10, RBM15B, RBPMS, SARNP, SMN1, SNRPA, SNW1, SRPK2, SYNCRIP, TFIP11, WBP11, CTNNBL1, HNRNPLL, BUD31, CSTF2, CWC15, DDX17, DDX39A, DDX39B, ELAVL2, HNRNPU, HNRNPUL1, KHDRBS2, LUC7L, MYOD1, NOL3, NSRP1, POLR2G, …
GO:0017145	stem cell division	0.00108724	3.04712	12	CUL3, LEF1, NAP1L2, NOTCH1, ZBTB16, FGF13, FGFR1, HOXB4, ING2, NCOA3, DCT, GNL3
GO:0070585	protein localization to mitochondrion	0.0011423	2.00176	27	AKT1, BAD, BCL2, CALM1, CASP8, E2F1, MAPT, PRKAA1, SFN, SREBF2, TP53, YWHAB, YWHAG, YWHAQ, YWHAZ, BAG3, DDIT3, FBXW7, FZD5, MAPK8, SREBF1, TP63, TP73, YWHAE, YWHAH, TSPO, USP36
GO:0042113	B cell activation	0.0011423	1.7437	40	ABL1, AHR, ATM, BAD, BCL2, BCL6, CASP3, CASP8, DLL1, EP300, GPS2, HDAC5, IKZF3, IL7R, LEF1, MLH1, NFATC2, PAXIP1, PRKCD, SP3, STAT6, SYK, TCF3, TNIP2, TP53BP1, BCL3, CD40, CD74, CD79A, FOXP3, IRS2, MEF2C, MSH6, NBN, NOTCH2, PIK3R1, PRKCB, PRKDC, STAT5B, CXCR5
GO:1903008	organelle disassembly	0.00117915	2.22186	21	ATP13A2, CDK1, GOLGA2, HDAC6, HIF1A, RNF41, SREBF2, VCP, BECN1, CTTN, FBXW7, FZD5, PPARGC1A, SREBF1, TSC2, WIPI2, MTIF2, MTIF3, TSPO, USP36, WDR45B
GO:0090077	foam cell differentiation	0.00120698	3.19222	11	EP300, MAPK9, NFKB1, NFKBIA, NR1H3, PPARA, PPARG, STAT1, ADIPOQ, NR1H2, SELENOK
GO:0048705	skeletal system morphogenesis	0.00123533	1.73625	40	ANKRD11, BMPR2, CARM1, CTNNB1, EIF4A3, HOXB6, MAPK14, MDFI, MEF2D, NAB2, PSEN1, RARG, RUNX2, SGPL1, SMAD2, SMAD3, TFAP2A, TGFBR1, THRA, ZEB1, ALX1, FGFR1, HOXA1, HOXB1, HOXB2, HOXB3, HOXB4, HOXB7, HOXC8, HOXD10, HOXD4, MEF2C, PAX5, RARA, RARB, ROR2, SOX9, TWIST1, ACVR2B, POC1A
GO:0071824	protein-DNA complex subunit organization	0.00126612	1.72082	41	ATF7IP, BAZ2A, CREB1, CUL4B, ESR1, GTF2B, HMGA1, HMGB1, MCM2, MYC, NAP1L1, NAP1L2, NAP1L4, NPM1, OIP5, PAF1, PIAS1, POGZ, PTMA, RB1, RBX1, SMARCB1, SMARCE1, TBP, TCF4, TERF1, THRA, TP53, UBC, ARID1A, CDT1, CENPS-CORT, DMC1, HMGB2, SET, SMARCC1, SOX9, TAF1B, UBTF, MIS12, PBRM1
GO:0045926	negative regulation of growth	0.00129277	1.70639	42	ADRB2, BCL2, BCL6, BMPR2, CCDC85B, CDK5, CDKL3, CDKN1B, CDKN2C, CXADR, ESR2, HIF1A, ING1, NOTCH1, PML, PPARA, PPARD, PPARG, PTEN, RACK1, RGS2, SERTAD2, SIRT1, SMAD3, SMAD4, SPP1, TCHP, TP53, WNT5A, CDKN2A, CDKN2D, FGF13, HNF4A, ING4, ING5, NOTCH2, SAV1, TP73, LBP, MSTN, SEMA6A, SH3BP4
GO:0031349	positive regulation of defense response	0.0013626	1.52237	64	APP, BIRC2, BIRC3, CARD9, CASP8, CCL5, CEBPB, CLOCK, CREBBP, EGFR, EP300, ERBIN, ESR1, F2RL1, GPS2, HMGB1, IKBKB, IRF3, IRF7, MAPK3, MARCO, MUC1, NFKB1, NFKBIA, NR1H3, PDPK1, PRKACA, PRKCD, RELA, RIPK1, RPS6KA5, S100A1, SRC, SYK, TNIP2, TRAF6, UBC, UBQLN1, XRCC6, WNT5A, CCL14, CCL3, CEBPA, CHUK, ETS1, HMGB2, IRF1, MEF2C, NR1H4, PAK2, PDCD4, PLSCR1, POLR3C, POLR3D, PRKDC, STAT5B, TIFA, CLEC4A, FCN…
GO:0021510	spinal cord development	0.00138546	2.14861	22	AKT1, DCTN1, DLL1, EED, GATA2, NEFL, NOTCH1, PTBP2, PTN, SOX4, TAL1, ASCL1, BAG3, DAB1, DMRT3, HOXD10, MTOR, OLIG2, PAX6, PROX1, ZIC1, GSX1
GO:0048880	sensory system development	0.00149336	1.57363	55	BCL2, BMPR2, CDK4, CDKN1B, CELF4, CTNNB1, DLL1, EGFR, GNB1, HDAC1, HIF1A, HMGB1, HMGN1, IMPDH2, JUN, MAF, MAX, MITF, NEUROD4, NF2, PRDM1, PRKCI, PSEN1, PTN, RARG, RXRA, SKIL, SMAD3, SP3, STAT3, TFAP2A, TGFBR1, THRB, VIM, YY1, ZEB1, WNT5A, ARID1A, FZD5, GJA8, KLF4, LHX2, LIMK2, NEUROD1, PAX6, PROX1, RARA, RARB, SHROOM2, SMG9, SOX9, SRF, TWIST1, ACVR2B, TGIF2
GO:0034109	homotypic cell-cell adhesion	0.00149362	2.34394	18	ACTB, ACTN1, CCL5, CXADR, DSC2, DSG2, DSP, FLNA, HSPB1, JUP, MYL9, PKP2, PRKCA, PRKCD, RDX, SYK, CTNNA3, TSPAN32
GO:0042180	cellular ketone metabolic process	0.00158816	1.82165	33	AKT1, BRCA1, FGFR4, IRS1, MLXIPL, NR1H3, PPARA, PPARG, PRKAA2, PRKAB2, SIRT1, SRD5A2, TYSND1, ADIPOQ, CYP11B2, EGR1, FDXR, IRS2, MTOR, NR1H2, NR1H4, NR4A3, OXCT1, PPARGC1A, PROX1, SREBF1, STAT5B, TWIST1, AADAT, GSTZ1, NDUFA9, NQO1, PDK2
GO:0051701	interaction with host	0.00164929	1.76645	36	BAD, BCL2L1, CASP8, CDH1, CDK1, CHMP2A, CTNNB1, CXADR, DAG1, EGFR, GAPDH, GRB2, KPNA2, KRT6A, MID2, NEDD4, PML, RXRA, SMAD3, SRC, TRIM27, TSG101, VPS18, CD74, CTNND1, CXCL8, DDX39B, EFNB2, GUCY1A1, RRAGA, SLC10A1, THOC7, TRIM21, ZC3H12A, FCN1, GPR15
GO:0002200	somatic diversification of immune receptors	0.00167851	2.46232	16	BCL6, HMGB1, LEF1, MLH1, PAXIP1, POLB, STAT6, TCF3, TP53BP1, CTNNBL1, CD40, FOXP3, HMGB2, MSH6, NBN, PRKDC
GO:0061053	somite development	0.00167851	2.20806	20	ABI1, BHLHE40, DLL1, EP300, KAT2A, LEF1, NKX3-1, NOTCH1, PSEN1, SMAD3, SMAD4, WNT5A, CDX2, DKK1, MEOX1, MEOX2, PRKDC, RIPPLY1, ROR2, TBX6
GO:0019058	viral life cycle	0.00169318	1.63939	46	APOE, BCL2, CCL5, CDC42, CDK1, CHMP2A, CTBP1, CTBP2, CXADR, DAG1, DDX5, EGFR, MID2, NOTCH1, NR5A2, PABPC1, PCBP1, PML, RAD23A, RAN, SMARCB1, SNF8, SRPK2, TRIM27, TSG101, UBC, VCP, VPS18, VPS37C, CCL2, CD74, CXCL8, DEK, EFNB2, ILF3, PLSCR1, PPIH, PROX1, SLC10A1, TRIM21, ZC3H12A, FCN1, GPR15, MX1, PPIE, TARBP2
GO:1990778	protein localization to cell periphery	0.00170432	1.61973	48	ACTB, ADAM10, AKT1, AR, ARF6, BCL2L1, BLZF1, CDH1, CDK5, CLTC, DAG1, EGFR, EXOC5, EZR, FLNA, GOPC, GORASP1, GORASP2, GRIP1, IFT20, IKBKB, JUP, KRT18, PDPK1, PKP2, PRKCI, PRKCZ, PRNP, RAB3A, RABEP1, RACK1, RDX, STX1B, GPR158, TSPAN14, TSPAN15, ADIPOQ, CIB1, EPB41L3, FGF13, KCNIP3, KCNIP4, PIK3R1, PKP3, PRAM1, RAB11A, LIN7B, SLMAP
GO:2000241	regulation of reproductive process	0.00172491	1.94497	27	AGO2, AR, AURKA, CDKN1B, CTNNB1, ESR1, NKX3-1, NOTCH1, NR5A1, PAEP, RXRA, SRC, TRIP13, WNT5A, CIB1, CITED2, NUPR1, SIRT2, SNAI1, SOX9, SPINK1, SRY, TTK, VIP, ZFPM2, CDC25A, GCM1
GO:0022604	regulation of cell morphogenesis	0.00172527	1.48169	69	ABL1, ADAM10, APOE, ARHGDIA, BMPR2, CCL7, CDC42, CDK5, CDKL3, CRK, DAG1, DLG4, EEF2K, EPS8, EZR, FLNA, FN1, GORASP1, GRIP1, GSK3B, ITSN2, L1CAM, MAPT, MSN, NEDD4, NEFL, NLGN3, PSEN1, PTEN, PTN, RAC1, RDX, RHOA, SHANK3, SKIL, SPP1, SRC, SS18L1, SYT17, TRPC5, WNT5A, ARPIN, CCL2, CCL3, CFL1, CIB1, CTTN, DAB1, DLC1, EPB41L3, EPHB3, FGF13, GDI1, MAP2K1, POU3F2, PPP1R9A, RAB11A, SRF, YWHAH, ANAPC2, CCL…
GO:0042107	cytokine metabolic process	0.00175277	2.10807	22	CARD9, CEBPB, HSPB1, IRF3, IRF7, NFKB1, RELA, STAT3, SYK, TRAF6, WNT5A, BCL3, EGR1, FOXP3, IRF1, KLF4, MAP2K5, MAST2, STAT5B, LBP, THBS1, TLR8
GO:0002244	hematopoietic progenitor cell differentiation	0.00176777	2.06737	23	ABL1, BCL2, GATA2, KMT2A, LMO2, MYB, NOTCH1, NUDT21, PSEN1, RUNX1, SETD1A, SOX4, TAL1, TCF12, TCF3, EEF2, HOXB3, HOXB4, MEOX1, PRKDC, SRF, TP73, ACP6
GO:0032409	regulation of transporter activity	0.00183009	1.68599	41	ACTB, ADRB2, AKAP9, APP, BCL2, CALM1, DLG4, GEM, GNB5, GOPC, KMT2A, MAPK8IP2, NEDD4, NLGN3, OXSR1, PDZK1, PPARG, PRKACA, PRKCD, PRNP, PTEN, RIPK1, RYR2, S100A1, SHANK3, SUMO1, UBQLN1, WNK1, EPO, KCTD7, MEF2C, PPARGC1A, PTPN3, TWIST1, YWHAE, YWHAH, CLIC2, JPH2, KCNA1, SGK2, SLMAP
GO:0055123	digestive system development	0.00189916	1.93127	27	BCL2, CCNB1, CTNNB1, DACT1, EGFR, HIF1A, KLF5, NOTCH1, PRDM1, RB1, SMAD2, SMAD3, WNT5A, ASCL1, CDX2, CXCL8, DAB1, EPHB3, GATA4, GATA5, GATA6, RARB, SAV1, TP63, ACVR2B, CCDC40, CPS1
GO:0071887	leukocyte apoptotic process	0.00197621	2.08837	22	AKT1, BCL6, CASP3, CCL5, HIF1A, IL7R, IRF3, IRF7, PTEN, RIPK1, SELENOS, SIRT1, TP53, WNT5A, CD74, CDKN2A, HSH2D, IRS2, LGALS14, MEF2C, NR4A3, CXCL12
GO:0006284	base-excision repair	0.00205643	2.83453	12	HMGA1, HMGB1, POLB, PRMT6, TDG, TP53, APEX1, ERCC6, FEN1, MPG, NEIL2, RECQL4
GO:0006383	transcription by RNA polymerase III	0.00209226	2.58543	14	AR, BRCA1, ELL, NAB2, TBP, ZNF76, RPTOR, CEBPA, MTOR, POLR1C, POLR3C, POLR3D, POLR3B, RO60
GO:0007163	establishment or maintenance of cell polarity	0.00218713	1.75122	35	ARF6, ARHGEF11, CDC42, CRK, DCTN1, ERBIN, EZR, GSK3B, LMNA, MSN, NDE1, PRKCI, PRKCZ, RACK1, RAP1B, RHOA, RNF41, SPRY2, SYNE4, SYNJ2BP, WNT5A, AQP1, CDX2, CFL1, CTNNA1, FGF13, LHX2, MARK4, PARD3B, PAX6, SNX27, CDH5, MYO9A, PARD3, RND1
GO:0001764	neuron migration	0.00225222	1.88343	28	CDK5, CRK, CTNNB1, DISC1, FLNA, GATA2, NDE1, NEUROD4, NKX2-1, PSEN1, RAC1, STAT3, TLX3, ASCL1, AUTS2, CCR4, DAB1, DCDC2, FGF13, FGFR1, MEF2C, NR2F2, NR4A2, PAX6, SRF, TWIST1, CXCL12, SEMA6A
GO:0000726	non-recombinational repair	0.00225222	2.25713	18	ATM, BARD1, BRCA1, KAT5, KDM2A, MDC1, MLH1, PAXIP1, SUMO1, TFIP11, TP53BP1, XRCC6, ATP23, DEK, MRE11, NBN, PRKDC, RAD50
GO:0034502	protein localization to chromosome	0.00225222	2.25713	18	ATR, CARM1, CDK1, ESR1, EZH2, IK, PLK1, POT1, RB1, RUVBL2, TERF1, TERF2, CCT4, CDT1, TTK, CCT8, GNL3, MIS12
GO:0008637	apoptotic mitochondrial changes	0.00249615	2.0139	23	AKT1, BAD, BCL2, BCL2L1, CASP8, E2F1, GSK3B, JUN, LMNA, SFN, TP53, YWHAB, YWHAG, YWHAQ, YWHAZ, BLOC1S2, MAPK8, NOL3, TP63, TP73, YWHAE, YWHAH, MPV17L
GO:0072089	stem cell proliferation	0.00249615	2.05005	22	CTNNB1, DISC1, HIF1A, KDM1A, LEF1, NDE1, NEUROD4, NF2, NOTCH1, RUNX1, WNT5A, ASCL1, CTNNA1, FGF13, FGFR1, HMGB2, HNRNPU, PAX6, THPO, DCT, KCNA1, MECOM
GO:0008202	steroid metabolic process	0.00250581	1.58808	48	APOE, APP, CYB5R3, CYP11A1, CYP2C8, EBP, ERG28, ESR1, FGFR4, NFKB1, NR1I2, NR5A1, NR5A2, PPARD, PRKAA1, PRKAA2, RAN, RXRA, SGPL1, SIRT1, SP1, SPP1, SRD5A2, SREBF2, SULT2A1, FDX1, CEBPA, CYP11B2, EGR1, FDXR, FGFR1, NFYB, NR1H4, PPARGC1A, PROX1, RORA, SNAI1, SREBF1, STAT5B, SULT1A2, TRERF1, VDR, YWHAH, CYP27A1, CYP51A1, HSD17B4, TSPO, UGT1A1
GO:0035148	tube formation	0.00255067	1.89132	27	ABL1, CTNNB1, HIF1A, KAT2A, NOTCH1, PRKACA, RARG, SOX4, ST14, TRAF6, TSC1, WNT5A, ALX1, ARID1A, CFL1, DLC1, FZD1, HOXA1, LHX2, PAX8, PROX1, RARA, SOX9, TEAD2, TSC2, TWIST1, SDC4
GO:0042391	regulation of membrane potential	0.0025873	1.49657	61	ABL1, ADRB2, AKAP9, AKT1, APP, BAD, BCL2, BCL2L1, CACNA1A, CDK5, CELF4, CXADR, DLG4, DSC2, DSG2, DSP, EIF4A3, FLNA, GSK3B, JUN, JUP, MAPK8IP2, MAPT, NEDD4, NLGN3, PKP2, PRKCZ, PSEN1, PTEN, PTN, RACK1, RYR2, SHANK3, SNTA1, SRC, STX1B, SUMO1, TCL1A, TRPC5, VCP, CTNNA3, KCNQ3, FGF13, GABRB1, HSH2D, KCTD7, MEF2C, PIAS3, PPP1R9A, PTPN3, SCN1A, SMAD7, YWHAE, YWHAH, KCNA1, KCNJ2, KCNMB3, KCNN2, P2RX4, S…
GO:0051047	positive regulation of secretion	0.00262691	1.50104	60	ABL1, ARF1, ATP13A2, BAD, CDK5, CHMP2A, CREB1, EGFR, EZR, F2RL1, GAPDH, GATA2, GLUL, HGS, HIF1A, HMGB1, IRF3, MAPK14, MAPK3, MBP, MYB, NKX3-1, PAEP, PPARD, PRKCZ, RAB3A, SMAD4, SNF8, SOX4, SPP1, SRC, STX1B, SYK, TCF7L2, TSG101, WNT5A, AQP1, CASP1, CCL3, CHUK, DTNBP1, FGFR1, FZD5, IRS2, NR1H2, NR1H4, OXCT1, SELENOK, TMF1, TWIST1, VIP, BAIAP3, CXCL12, FCN1, GNAI2, GPR27, P2RX4, SDC4, SLC6A1, TLR8
GO:0031346	positive regulation of cell projection organization	0.002663	1.53052	55	APOE, ARF1, ARHGDIA, BMPR2, CDC42, CDKL3, DLG4, EEF2K, EP300, EPS8, EZH2, F2RL1, FN1, GRIP1, ITSN2, KAT2A, KCTD17, KDM1A, L1CAM, MAPT, NEFL, NME1, PRKCI, PSEN1, PTN, RAC1, RGS2, RHOA, SHANK3, SKIL, SRC, SS18L1, STMN2, SYT17, TGFBR1, TRPC5, WNT5A, AUTS2, EPO, FGFR1, FZD1, GDI1, LCN2, MAGI2, MAP2K1, MARK4, MTOR, PPP1R9A, RAB11A, SRF, ANAPC2, CXCL12, DBN1, MSTN, PLXNC1
GO:0006289	nucleotide-excision repair	0.00277736	2.03141	22	ATXN3, COPS2, COPS5, COPS6, CUL4B, EP300, GPS1, HMGB1, HMGN1, PCNA, POLB, RAD23A, RBX1, SIRT1, TP53, UBC, ERCC6, FAN1, NEIL2, POLD2, POLR2G, PPIE
GO:0051235	maintenance of location	0.00283135	1.5778	48	ABL1, AKAP9, AKT1, APOE, BARD1, CALM1, CDK5, DAG1, ERO1A, EZR, FAF1, FLNA, FLNB, GOPC, JUP, MDFI, NFKB1, NFKBIA, NR1H3, NR5A1, PDPK1, PML, PPARA, PPARD, PPARG, PRKACA, RANGAP1, RYR2, SIRT1, SREBF2, TXN, YWHAB, BCL3, CCL3, DDIT3, EPB41L3, FBXW7, GAA, HNRNPU, LCN2, NOL3, NR1H2, STAT5B, ZC3H12A, CLIC2, DBN1, JPH2, TSPO
GO:0097194	execution phase of apoptosis	0.00294484	2.20274	18	AKT1, BCL2L1, CASP10, CASP3, CASP6, CASP7, CASP8, HMGB1, TP53, CASP1, CASP4, DEDD2, DLC1, FEN1, HMGB2, PAK2, SIRT2, ZC3H12A
GO:0010657	muscle cell apoptotic process	0.00302889	2.32161	16	ATF4, GNB1, HAND2, PDPK1, PPARG, PTEN, RBM10, SIRT1, BAG3, CDKN2A, MAP2K4, MAP3K5, NOL3, PAX8, PDCD4, ZC3H12A
GO:0044070	regulation of anion transport	0.00302889	2.14427	19	AKT1, APOE, ATF4, CEBPB, GOPC, PDZK1, PRKCD, PRNP, PSEN1, RGS2, RIPK1, SYK, FGFR1, IRS2, MTOR, NCOR1, P2RX4, SLC6A1, THBS1
GO:0050808	synapse organization	0.00326033	1.50377	57	ABL1, ACTB, ACTN1, ADAM10, APOE, APP, ARF1, ARF6, CDC42, CDH1, CDK5, CTBP2, CTNNB1, DAG1, DCTN1, DLG4, EEF2K, ERBB2, HDAC6, L1CAM, MAPK14, MAPT, NEDD4, NEFL, NLGN3, PIN1, PRNP, PSEN1, PTEN, PTN, RAB3A, RHOA, SHANK3, TSC1, VCP, YWHAZ, NRDC, WNT5A, CFL1, CTNND2, CTTN, DKK1, EFNB2, EPHB3, FZD1, FZD5, MAGI2, MEF2C, PDZRN3, PPP1R9A, SYNDIG1, ANAPC2, CNTN5, DBN1, PCDHGC4, PCDHGC5, TUBB
GO:0043276	anoikis	0.00342678	2.98737	10	AKT1, BCL2, BRMS1, E2F1, NOTCH1, SRC, TLE1, MCL1, MTOR, TSC2
GO:0048871	multicellular organismal homeostasis	0.00348002	1.44792	67	ACTB, ADRB2, ANKRD11, ARNTL, ATF4, BARD1, BCL2, CEBPB, CTNNB1, CXADR, DLL1, EGFR, ESRRG, EXOC5, FOXO1, GADD45G, GATA2, HAMP, HSPB1, KDM1A, KRT1, MLXIPL, NOS3, NOTCH1, NR1H3, PRKAA1, PRKAA2, PRKAB2, PRKACA, PRKCA, RAC1, RB1, RHEB, SFN, SPP1, SRC, STAT3, STAT6, SYK, THRA, TNS2, TRAF6, NRDC, ADIPOQ, AQP1, CALCA, CYP11B2, DDIT3, EGR1, EPAS1, ERCC6, HDAC3, KRT16, LCN2, NEUROD1, NR1H2, NR4A3, PPARGC1A,…
GO:0060560	developmental growth involved in morphogenesis	0.00360714	1.67027	37	ABL1, APOE, APP, AURKA, BMPR2, CDK5, CDKL3, CTNNB1, ESR1, FN1, GSK3B, HDAC6, ITSN2, L1CAM, MAPT, NLGN3, NOTCH1, PRKCZ, RARG, SPP1, SPRY2, SYT17, TRPC5, WNT5A, AUTS2, CTTN, FGF13, GDI1, LHX2, MAGI2, RAB11A, SOX9, SRF, ANAPC2, CXCL12, RAPH1, SEMA6A
GO:0050435	amyloid-beta metabolic process	0.00360714	2.79319	11	ADAM10, APH1A, APOE, APP, BACE1, CASP3, PRNP, PSEN1, BECN1, NCSTN, PSENEN
GO:0031023	microtubule organizing center organization	0.00360714	1.89497	25	AURKA, BRCA1, CDK1, CDK2, CHD3, CHEK1, CHMP2A, CTNNB1, DCTN1, GOLGA2, KAT2A, KAT2B, NDE1, NPM1, NUP62, PLK1, TRIM37, CEP192, ATF5, CEP72, CHORDC1, MARK4, PLK2, SSX2IP, POC1A
GO:0051193	regulation of cofactor metabolic process	0.00367884	2.21372	17	ARNT, GCKR, HDAC6, HIF1A, MLXIPL, MYOG, NOXA1, PPARA, PRKAA1, PRKAA2, RAC1, STAT3, NCOR1, PPARGC1A, GSTZ1, MPV17L, PDK2
GO:0006302	double-strand break repair	0.0038168	1.67731	36	ATM, BARD1, BRCA1, CHEK1, KAT5, KDM1A, KDM2A, MDC1, MGMT, MLH1, MORF4L1, OTUB1, PAXIP1, PML, RAD54B, SPIRE1, SUMO1, TDP2, TFIP11, TP53BP1, TRIP13, VCP, XRCC6, YY1, ATP23, CIB1, DEK, DMC1, FAN1, FEN1, MRE11, NBN, PRKDC, RAD50, RECQL4, TWIST1
GO:0033619	membrane protein proteolysis	0.0040246	2.41015	14	ADAM10, APH1A, APOE, BACE1, DAG1, NFKB1, PSEN1, RELA, TRAF6, NRDC, APH1B, NCSTN, PSENEN, PTPN3
GO:2001057	reactive nitrogen species metabolic process	0.0040246	2.25713	16	AKT1, DDAH2, NOS3, RAC1, SELENOS, SMAD3, SUOX, KLF2, KLF4, MTOR, RORA, ZC3H12A, CPS1, NQO1, P2RX4, TSPO
GO:0060627	regulation of vesicle-mediated transport	0.00409796	1.42484	70	ABL1, AP2B1, APOE, APP, ARF1, ARF6, ATP13A2, ATXN2, BACE1, CALM1, CDK5, CHMP2A, DLG4, DLL1, EEF2K, EZR, F2RL1, GAS1, GATA2, GOPC, GSK3B, HGS, HMGB1, HNRNPK, MAPK1, MAPK3, MSN, NOTCH1, NR1H3, PDPK1, PPARG, PRKAA1, PSEN1, PTEN, RAB3A, RAC1, RACK1, RAP1B, RDX, RUFY1, SNF8, SRC, STX1B, SYK, SYNJ2BP, TSG101, VPS18, FER, WNT5A, ADIPOQ, APBA1, CCL2, DKK1, DTNBP1, EFNB2, MAGI2, MAP2K1, NR1H2, PRAM1, PRKC…
GO:0022616	DNA strand elongation	0.00416909	3.38569	8	PCNA, POT1, FEN1, GINS3, MRE11, NBN, POLD2, RAD50
GO:0007164	establishment of tissue polarity	0.00416909	2.1857	17	ABL1, AP2B1, CDC42, CLTC, DAAM1, DACT1, EXOC5, IFT20, RAC1, RHOA, WNT5A, DKK1, FZD1, FZD5, MAGI2, ROR2, TP63
GO:0042116	macrophage activation	0.00416909	2.1857	17	APP, ATM, HMGB1, JUN, MAPT, NR1H3, PLA2G5, SYK, TNIP2, WNT5A, CD74, CEBPA, RORA, ZC3H12A, LBP, THBS1, TLR8
GO:0032615	interleukin-12 production	0.00418923	2.49136	13	HMGB1, IRF5, MAPK14, NFKB1, PRKCD, RELA, TRAF6, CD40, IRF1, MAST2, IL23A, THBS1, TLR8
GO:0051602	response to electrical stimulus	0.0043477	2.72507	11	AKAP9, MYOG, PTEN, RAB3A, RPS6KB1, SRC, TRIM63, EPO, PPARGC1A, MSTN, NQO1
GO:0006403	RNA localization	0.00441672	1.6483	37	ATM, ATR, ATXN2, DCP2, EIF4A3, EIF5A2, EXOSC10, MVP, NPM1, NUP62, NUP98, PHAX, POLDIP3, RAN, RBM15B, RUVBL2, SARNP, SEC13, TERF1, TERF2, TSC1, UPF1, UPF2, YY1, CCT4, DDX39A, DDX39B, HNRNPU, MCM3AP, RPS15, SRSF11, SRSF5, THOC7, CCT8, IWS1, SNUPN, SRSF7
GO:0050920	regulation of chemotaxis	0.00458243	1.68459	34	ADAM10, BMPR2, CCL5, CCL7, CREB3, F2RL1, HMGB1, HSPB1, MAPK14, MAPK3, NOTCH1, OXSR1, PDGFB, RAC1, SMAD3, WNK1, CCR1, WNT5A, CCL2, CCL26, CCL3, CCR4, CD74, CXCL8, EFNB2, FGFR1, MPP1, CXCL12, IL23A, LBP, MSTN, P2RX4, SEMA6A, THBS1
GO:0000910	cytokinesis	0.00458243	1.78867	28	ALKBH4, ARF1, AURKA, BCL2L1, CALM1, CDC42, CDC6, CHMP2A, CUL3, ECT2, NUP62, PIN1, PKP4, PLK1, RHOA, SPIRE1, STAMBP, SVIL, BECN1, CDT1, CFL1, FSD1, RAB11A, UNC119, CKAP2, CXCR5, KIF20A, SSTR5
GO:0048678	response to axon injury	0.0050101	2.27397	15	BCL2, CDK1, DAG1, JUN, MAX, NEFL, PTEN, RANGAP1, SPP1, CTNNA1, EPO, KLF4, MAP2K1, P2RX4, TSPO
GO:0071772	response to BMP	0.00501331	1.77749	28	ABL1, BMPR2, DDX5, HTRA1, LEF1, MAPK3, NOTCH1, RUNX2, RYR2, SKIL, SMAD1, SMAD2, SMAD4, UBE2D1, WNT5A, DKK1, EGR1, FZD1, GATA4, GATA5, GATA6, PDCD4, ROR2, SMAD5, SMAD7, SOX9, ACVR2B, RGMB
GO:0051258	protein polymerization	0.00509815	1.57999	42	ABI2, ABL1, AKAP9, ARF1, ARF6, ARPC3, CDKN1B, CHMP2A, DCTN1, EPS8, GMFB, GOLGA2, GRB2, JMY, MAPT, NDE1, NEFL, PIN1, PRKCD, RAC1, RDX, RHOA, SPIRE1, STMN2, TRIM27, WASHC3, CEP192, FER, ARPIN, CATIP, CCL26, CTTN, FGF13, MLST8, MTOR, MZT1, NCK2, PPP1R9A, CAPZA2, EML2, FHOD3, MX1
GO:0007422	peripheral nervous system development	0.00522717	2.19612	16	AKT1, CDK1, CDK5, DAG1, ERBB2, ERBB3, ETV1, HAND2, NAB2, RELA, RUNX1, RUNX3, HOXD10, POU3F2, SIRT2, PARD3
GO:1990823	response to leukemia inhibitory factor	0.00546923	2.03141	19	CREB1, CTBP2, DTX1, EED, EPS8, KLF5, NR5A2, PML, RARG, SIRT1, SPRY2, EFHC2, HNRNPU, KLF4, MYBL2, NFYB, PAX6, SMAD7, SRSF7
GO:0098727	maintenance of cell number	0.0054884	1.80879	26	CTNNB1, DLL1, EZH2, FOXO1, FOXO3, GATA2, NOTCH1, PAF1, SMAD2, SMAD4, SOX4, STAT3, TAL1, ARID1A, CDX2, KLF4, MED10, NCOA3, NOTCH2, PAX8, PROX1, SAV1, SOX9, SS18, TP63, GNL3
GO:0071706	tumor necrosis factor superfamily cytokine production	0.00573778	1.82681	25	APP, CARD9, HMGB1, HSPB1, RIPK1, SELENOS, TRIM27, WNT5A, ADIPOQ, BCL3, CCL3, FOXP3, FZD5, NR1H4, PIK3R1, POMC, RARA, SELENOK, TWIST1, ZC3H12A, CLEC4A, IL23A, LBP, THBS1, TSPO
GO:0055081	anion homeostasis	0.0057606	2.40076	13	APOE, FGFR4, MLXIPL, PRKAA1, PRKAA2, SIRT1, SLC34A3, SLC12A5, HNF4A, KCTD7, NR1H4, CKB, CPS1
GO:0099601	regulation of neurotransmitter receptor activity	0.0057606	2.40076	13	ADRB2, AKAP9, APP, DLG4, MAPK8IP2, NLGN3, NPTX1, NPTX2, NPTXR, SHANK3, SRC, MEF2C, PPARGC1A
GO:0032259	methylation	0.00580027	1.49714	51	AMT, ATF7IP, BAZ2A, BRCA1, CARM1, CTNNB1, DNMT3B, EED, EZH2, FOS, GNMT, KMT2A, KMT2B, LMNA, MGMT, MYB, MYC, PAF1, PAGR1, PAXIP1, PHF1, PRDM1, PRMT1, PRMT6, RBM15B, SETD1A, SETDB1, SIRT1, SMAD4, SMARCB1, SNW1, SUV39H1, ARID4B, ASH2L, AUTS2, CXXC1, FBXO11, KMT2C, METTL1, METTL2B, NR1H4, PAX5, PRDM4, PRMT2, SATB1, TGS1, TRDMT1, WDR82, IWS1, MECOM, PWP1
GO:0051260	protein homooligomerization	0.00599408	1.50817	49	APIP, APOE, ATL1, CHMP2A, DCTPP1, ECT2, GLUL, GNMT, GOLGA2, GOPC, IMPDH2, KCTD17, LNX1, PCBD1, PRMT1, PRNP, RACK1, RIPK1, RNF213, RXRA, SMAD4, SRC, TCL1A, TK1, TP53, TP53BP1, TRAF2, TYSND1, VCP, USP16, ADIPOQ, CD79A, FSD1, GJA8, KCTD4, KCTD5, KCTD7, KCTD9, LCN2, ST13, TIFA, TP63, CCDC88C, DCXR, KCNA1, KCNJ2, P2RX4, SLC6A1, VWF
GO:0098760	response to interleukin-7	0.00602179	2.94883	9	HMGB1, IL7R, IRS1, JAK1, STAT3, STAT5A, STIP1, IRS2, STAT5B
GO:0045103	intermediate filament-based process	0.00602179	2.48744	12	ATXN3, CSNK1A1, DSP, ERBIN, GFAP, KRT18, NEFL, PKP2, VIM, KRT16, KRT25, KRT3
GO:0060324	face development	0.00602179	2.48744	12	ANKRD11, LEF1, MAPK1, MAPK3, RARG, SGPL1, WNT5A, DKK1, HOXB3, MAP2K1, RARA, SRF
GO:0009791	post-embryonic development	0.00603218	2.05424	18	ABL1, AGO2, BCL2, HMGN1, PRDM1, PSEN1, RAB3A, SGPL1, SMAD2, TGFBR1, ATF5, FZD5, KLF4, MTOR, NR4A2, PLAGL2, SELENOP, ACVR2B
GO:1902115	regulation of organelle assembly	0.00603218	1.65235	34	ATXN2, BRCA1, CHMP2A, EZR, IFT20, KAT2A, KAT2B, KCTD17, MAPK9, MSN, NPM1, NUP62, PAN2, PAN3, PLK1, PRKAA1, PRKAA2, RDX, RHOA, SMAD4, SRC, TCHP, TRIM37, TSG101, BECN1, DCDC2, HNRNPU, MARK4, MEF2C, PLK2, PROX1, UBQLN2, SDC4, TBC1D16
GO:0006310	DNA recombination	0.00603218	1.56263	42	ATM, BCL6, BRCA1, CHEK1, HMGB1, IL7R, KDM1A, KPNA2, LEF1, MLH1, MORF4L1, NCOA6, PAGR1, PAXIP1, POLB, RAD54B, RUVBL2, STAT6, TCF3, TERF2, TEX11, TP53BP1, TRIP13, UCHL5, XRCC6, YY1, NFRKB, APEX1, CD40, CENPS-CORT, DMC1, FAN1, FEN1, FOXP3, HMGB2, MEI4, MRE11, MSH6, NBN, PRKDC, RAD50, RECQL4
GO:0006360	transcription by RNA polymerase I	0.00611134	2.29353	14	ATF4, BAZ2A, ERBB2, FLNA, MAPK3, SMARCB1, TBP, ERCC6, MTOR, POLR1C, TAF1B, UBTF, PWP1, WDR75
GO:0044706	multi-multicellular organism process	0.00653353	1.63072	35	AGO2, AKT1, AR, ARNTL, BCL2, BMPR2, DSG1, DSG2, ESR1, FOS, GJB2, JUNB, KLF1, LDOC1, PGR, PPARD, PRDM1, RECK, RGS2, RXRA, SP3, SPP1, ARID1A, CALCA, EPO, ETS1, FOSB, FOSL1, MTOR, NR2F2, RARA, STAT5B, UMPS, VDR, IGFBP2
GO:0090596	sensory organ morphogenesis	0.00653353	1.5845	39	BCL2, CTNNB1, DLL1, GATA2, HDAC1, HIF1A, HMGN1, MAPK1, MAPK3, PRDM1, PRKCI, PTN, RARG, SP3, SPRY2, STAT3, TFAP2A, THRB, YY1, ZEB1, WNT5A, ARID1A, FGFR1, FZD5, HOXA1, HOXC13, KCNQ4, NR4A3, PAX6, PAX8, PDZD7, PROX1, RARB, ROR2, SHROOM2, SOX9, TWIST1, WHRN, ZIC1
GO:0007006	mitochondrial membrane organization	0.00665557	1.85407	23	BAD, BCL2, BCL2L1, CALM1, CASP8, E2F1, GSK3B, IMMT, SFN, STAT3, TP53, YWHAB, YWHAG, YWHAQ, YWHAZ, BLOC1S2, MAPK8, NOL3, TP63, TP73, YWHAE, YWHAH, MPV17L
GO:0060840	artery development	0.00670798	2.08036	17	AP2B1, APOE, BMPR2, HAND2, NKX3-1, NOTCH1, NOTCH3, PRDM1, SOX4, TGFBR1, EFNB2, FOXH1, HOXA1, PROX1, SMAD7, SRF, ACVR2B
GO:0017038	protein import	0.00694533	1.63668	34	AKT1, APOE, ARNTL, BCL6, CDH1, CDK1, ECT2, FLNA, GCKR, JUP, KPNA2, LMNA, MAPK1, MAPK14, NFKBIA, NUP62, NUP98, PML, PRKCD, PSEN1, RAN, SIRT1, SMAD3, STAT3, SYK, TXN, BAG3, BCL3, HDAC3, PIK3R1, TSC2, ZC3H12A, ZIC1, SNUPN
GO:0002285	lymphocyte activation involved in immune response	0.00698667	1.71253	29	ABL1, APBB1IP, BCL6, DLL1, F2RL1, HMGB1, LEF1, MLH1, MYB, PAXIP1, PRKCZ, PSEN1, STAT3, STAT6, TP53BP1, TSC1, BCL3, CD40, FOXP3, MSH6, MTOR, NBN, NOTCH2, RARA, RORA, SMAD7, ZBTB7B, ZC3H12A, IL23A
GO:0071774	response to fibroblast growth factor	0.00732268	1.78822	25	CCL5, CDC5L, CTNNB1, ELK1, FGFR4, FRS3, GRB2, GTF2F2, MAPK1, MAPK3, NR4A1, PTBP1, RUNX2, SPRY2, WNT5A, CCL2, CXCL8, FAM20C, FGFR1, OTX2, POLR2G, RBFOX2, SPRED1, CPS1, THBS1
GO:0036344	platelet morphogenesis	0.00744938	3.38569	7	ACTN1, CASP3, EP300, TAL1, CIB1, MEF2C, SRF
GO:1990845	adaptive thermogenesis	0.00758164	1.76056	26	ADRB2, ARNTL, ATF4, CEBPB, ESRRG, GADD45G, KDM1A, NOTCH1, NR1H3, PRKAB2, RB1, RHEB, STAT6, SYK, THRA, NRDC, ADIPOQ, DDIT3, EPAS1, HDAC3, HNRNPU, LCN2, NR1H2, PPARGC1A, ZBTB7B, ACVR2B
GO:0050900	leukocyte migration	0.00762708	1.43023	59	ADAM10, AKT1, APP, CCL15, CCL16, CCL5, CCL7, CCL8, CREB3, CRK, CXADR, EPS8, F2RL1, FN1, GRB2, GRB7, HMGB1, L1CAM, MAPK14, MAPK3, MSN, OXSR1, PDGFB, RAC1, RHOA, SRC, SYK, TNFRSF10B, WNK1, YES1, CCR1, FER, WNT5A, CALCA, CCL14, CCL2, CCL23, CCL26, CCL28, CCL3, CD74, CXCL8, GYPC, MPP1, PIK3R1, ROR2, SELENOK, STAT5B, CCL13, CXCL12, CXCR5, FOLR2, GPR15, IL23A, LBP, MSTN, P2RX4, SDC4, THBS1
GO:0042303	molting cycle	0.00781782	1.8876	21	ARNTL, BCL2, CLOCK, CTNNB1, EGFR, HDAC1, NOTCH1, RELA, SMAD4, WNT5A, DKK1, HOXC13, KRT16, KRT17, KRT25, KRT27, LHX2, SAV1, SNAI1, SOX9, TP63
GO:0050918	positive chemotaxis	0.00805969	2.22186	14	CCL15, CCL16, CCL5, F2RL1, HMGB1, PDGFB, SMAD3, WNT5A, CCL3, CCR4, CXCL8, HMGB2, TSC2, CXCL12
GO:0006984	ER-nucleus signaling pathway	0.00870516	2.48284	11	ATF4, GSK3B, SELENOS, TP53, CCL2, CXCL8, DDIT3, FBXW7, HERPUD1, NCK2, ZBTB7B
GO:0010463	mesenchymal cell proliferation	0.00870516	2.48284	11	CTNNB1, HAND2, LMNA, MYC, PTN, STAT1, ZEB1, WNT5A, FGFR1, IRS2, SOX9
GO:0007015	actin filament organization	0.00884151	1.43979	55	ABI1, ABI2, ABL1, ACTN1, ARF1, ARF6, ARPC3, BCL2, CDC42, CUL3, EPS8, EZR, F2RL1, FLNA, GMFB, GRB2, JMY, NF2, PRKCD, PRKCI, RAC1, RDX, RHOA, SHANK3, SMAD3, SPIRE1, SRC, TGFBR1, TRIM27, TSC1, WASHC3, FER, PLS3, ARPIN, CATIP, CCL26, CFL1, CTNNA1, CTTN, DLC1, MLST8, MTOR, NCK2, PIK3R1, PPP1R9A, PROX1, SHROOM2, SORBS3, SRF, CAPZA2, CXCL12, DBN1, FHOD3, RND1, SDC4
GO:0005976	polysaccharide metabolic process	0.00890725	1.89852	20	AKT1, CLTC, GNMT, GSK3B, HMGB1, IRS1, NFKB1, PDGFB, PPP1CA, PPP1CB, PPP1CC, SELENOS, DYRK2, GAA, IRS2, MTOR, POMC, PPP1R3A, HAS3, PCDH12
GO:0031503	protein-containing complex localization	0.00916409	1.52356	42	ADAM10, AP2B1, ATM, ATR, DAG1, DLG4, EIF4A3, EZR, GRIP1, IFT20, NPM1, NUP62, NUP98, POLDIP3, PRKCZ, RAN, RBM15B, SARNP, SEC13, STX1B, SYNJ2BP, TERF1, TERF2, TSC1, UPF1, UPF2, CEP72, DDX39A, DDX39B, EFNB2, HNRNPU, MZT1, RAB11A, RPS15, SMAD7, SRSF11, SRSF5, SSX2IP, THOC7, DBN1, IWS1, SRSF7
GO:0099072	regulation of postsynaptic membrane neurotransmitter receptor levels	0.00920078	2.18768	14	ADAM10, AP2B1, DAG1, DLG4, EPS8, ERBIN, GRIP1, PRKCI, PRKCZ, STX1B, CTNND1, EFNB2, RAB11A, YWHAE
GO:0051346	negative regulation of hydrolase activity	0.00939752	1.4107	60	A2M, ABL1, AKT1, APP, BEX3, BIRC2, BIRC3, CSNK2A1, ELL, ENSA, GAPDH, GPS1, GPS2, GSK3B, IKBKB, ITIH3, LEF1, MCM2, MDM2, NOS3, PPP1R8, PRKCZ, PTN, RDX, RECK, RGS2, SFN, SIRT1, SPRY2, SRC, TERF1, TERF2, TNFAIP8, TP53, TSC1, UCHL5, WNK1, CEP192, RPS6KA1, SERPINB7, AQP1, CDKN2D, HERPUD1, KLF4, MAP2K5, NOL3, PAK2, PTPA, SET, SPINK1, SPRED1, YWHAE, GNAI2, MASTL, RASA4, SH3BP4, TFPI2, THBS1, TMBIM6, WFD…
GO:0014812	muscle cell migration	0.00947756	2.05713	16	BCL2, CCL5, CRK, MDM2, PDGFB, PLAT, PLAU, PPARD, RPS6KB1, SRC, ADIPOQ, APEX1, MEF2C, NR4A3, PPARGC1A, MSTN
GO:0035924	cellular response to vascular endothelial growth factor stimulus	0.00949693	2.34394	12	AKT1, DLL1, ERN1, GAS1, HSPB1, MAPK14, NOTCH1, NR4A1, RELA, SPRY2, JCAD, SEMA6A
GO:0006925	inflammatory cell apoptotic process	0.00961258	3.23179	7	CCL5, IRF3, IRF7, SELENOS, SIRT1, CDKN2A, MEF2C
GO:0031109	microtubule polymerization or depolymerization	0.00974852	1.88094	20	ABL1, AKAP9, CDKN1B, DCTN1, GOLGA2, HDAC6, MAPT, NDE1, PIN1, RAC1, STMN2, TRIM54, CEP192, CIB1, FGF13, MAPRE2, MID1, MZT1, CKAP2, EML2
GO:0021915	neural tube development	0.00980874	1.70336	27	ABL1, DACT1, HIF1A, KAT2A, NOTCH1, PRKACA, PSEN1, RARG, SOX4, ST14, TRAF6, TSC1, WNT5A, ALX1, ARID1A, CFL1, DLC1, FERD3L, FZD1, LHX2, PAX6, PROX1, RARA, TEAD2, TSC2, TWIST1, SDC4
GO:0048771	tissue remodeling	0.0104324	1.71483	26	ADRB2, BMPR2, CTNNB1, EGFR, HAND2, HIF1A, HMGB1, MDM2, MITF, NOS3, PLG, PRKCA, RAC1, SPP1, SRC, SYK, TRAF6, CALCA, ELF3, EPAS1, MEF2C, NOL3, NOTCH2, VDR, ACVR2B, IL23A
GO:0048010	vascular endothelial growth factor receptor signaling pathway	0.0104979	1.98471	17	ABI1, ARNT, CDC42, CRK, HGS, HIF1A, HSPB1, MAPK14, NEDD4, RAC1, RHOA, SH2D2A, SRC, NCK2, PAK2, PIK3R1, PRKCB
GO:0098927	vesicle-mediated transport between endosomal compartments	0.0106229	2.53927	10	EZR, HOOK2, MAPK1, MAPK3, MSN, RDX, SNF8, SRC, BECN1, MAP2K1
GO:0048536	spleen development	0.010839	2.68863	9	ABL1, BCL2, POLB, BCL3, CDKN2B, CITED2, HOXB4, NFKB2, PRKDC
GO:0035264	multicellular organism growth	0.0109877	1.72739	25	ADRB2, ANKRD11, APP, AR, BCL2, CDK4, CREB1, EZR, KAT2A, RARG, SGPL1, STAT3, STAT5A, TNS2, SLC12A5, APBA1, ATF5, ERCC6, KLF2, MTOR, POU3F2, RARA, RARB, STAT5B, TARBP2
GO:0003158	endothelium development	0.0113136	1.82306	21	BMPR2, CSNK2B, CTNNB1, DLL1, EZR, F2RL1, IKBKB, MSN, NOTCH1, NOTCH4, PTN, RAP1B, RDX, RHOA, SMAD4, ZEB1, NR2F2, PROX1, VEZF1, ACVR2B, CDH5
GO:0032103	positive regulation of response to external stimulus	0.0118781	1.49063	43	ADAM10, APP, BMPR2, CCL5, CCL7, CEBPB, CLOCK, CREB3, EGFR, F2RL1, HMGB1, HSPB1, MAPK14, MAPK3, NFKBIA, OXSR1, PDGFB, PLG, PRKCA, RAC1, SMAD3, SNW1, TRAF6, WNK1, CCR1, WNT5A, CCL14, CCL26, CCL3, CCR4, CD74, CEBPA, CXCL8, ETS1, FGFR1, PDCD4, STAT5B, CXCL12, IL23A, LBP, MSTN, P2RX4, THBS1
GO:0002931	response to ischemia	0.0126584	2.47733	10	BCL2, EEF2K, GJB2, CIB1, EEF2, EGR1, MAP3K5, NOL3, PPARGC1A, P2RX4
GO:0035966	response to topologically incorrect protein	0.0126805	1.62081	30	ATF4, ATXN3, BAG6, CCND1, COPS5, CREB3, CUL3, DCTN1, EP300, ERN1, ERO1A, HDAC6, HSPB1, LMNA, RACK1, SELENOS, STT3B, VCP, BAG3, CCL2, CXCL8, CXXC1, DDIT3, HERPUD1, NCK2, PIK3R1, ZBTB17, DNAJB12, THBS1, TMBIM6
GO:0071826	ribonucleoprotein complex subunit organization	0.0129833	1.53392	37	AGO2, ATM, ATR, ATXN2, CELF4, EIF4H, G3BP1, GRB7, MAPT, NPM1, NUDT21, PAN2, PAN3, PATL1, PRKAA1, PRKAA2, PRPF3, PTBP2, RPL5, RUVBL2, SMN1, SRPK2, TFIP11, VCP, AGO1, DDX39B, LUC7L, NOL3, RPL23A, RPS15, SCAF11, SRSF5, TGS1, MTIF2, MTIF3, SNUPN, TARBP2
GO:0060021	roof of mouth development	0.0129833	1.94011	17	HAND2, LEF1, SGPL1, SMAD2, SMAD4, SUMO1, TFAP2A, TGFBR1, WNT5A, ALX1, EPHB3, FZD1, MEF2C, MEOX2, SNAI1, TWIST1, ACVR2B
GO:0070670	response to interleukin-4	0.0129833	2.61182	9	CDK4, IMPDH2, LEF1, MCM2, PML, STAT6, CITED1, STAT5B, TUBA1B
GO:0071542	dopaminergic neuron differentiation	0.0129833	2.61182	9	CTNNB1, FOXA2, GSK3B, HIF1A, WNT5A, DKK1, FZD1, NR4A2, OTX2
GO:0010586	miRNA metabolic process	0.0129833	2.80195	8	AGO2, NFKB1, RAN, RELA, AGO1, DDX17, ZC3H12A, TARBP2
GO:0070849	response to epidermal growth factor	0.0137464	2.32766	11	AKT1, EEF1A1, EGFR, ERBB2, MAPK1, MAPK3, PDPK1, ASCL1, BECN1, SOX9, STAT5B
GO:0072507	divalent inorganic cation homeostasis	0.0143934	1.35702	66	ABL1, ACKR2, APOE, APP, ATF4, ATP13A2, ATP2A3, BCL2, CACNA1A, CALM1, CCL15, CCL5, CCL7, CCL8, CDK5, DLG4, EGFR, ERO1A, ESR1, F2RL1, GATA2, GNB1, HMGB1, IMMT, KCTD17, PDPK1, PML, PRKACA, PRNP, PSEN1, RYR2, SMAD3, TRPC5, CCR1, WNT5A, BDKRB2, CALCA, CCL14, CCL23, CCL28, CCL3, CCR4, CCR9, CD40, DDIT3, EPO, HERPUD1, NOL3, PRKCB, RMDN3, SELENOK, VDR, YWHAE, CCL13, CLIC2, CXCL12, CXCR5, F2RL2, HRH4, JPH…
GO:0005996	monosaccharide metabolic process	0.0144618	1.48728	41	AKT1, ATF4, BAD, CYB5R3, FOXA2, FOXO1, GAPDH, GCKR, GNMT, GSK3B, HMGB1, IRS1, KAT2A, KAT2B, MAPK14, NCOA2, PDHB, PPARA, PPARD, PPP1CA, PRKAA1, SELENOS, SIRT1, SRC, XYLB, GALE, ADIPOQ, DYRK2, GAA, IRS2, MTOR, PCK2, POMC, PPARGC1A, RORA, RPIA, DCXR, FBP2, PDK2, UGT1A1, UGT1A3
GO:0070661	leukocyte proliferation	0.0153285	1.48199	41	ABL1, AHR, ATM, BCL2, BCL6, CASP3, CCL5, CCL8, CEBPB, CTNNB1, ERBB2, F2RL1, HMGB1, IKZF3, IL7R, IMPDH2, LEF1, MSN, NFATC2, PDCD1LG2, PRKCD, PRNP, SYK, TRAF6, CD40, CD74, CD79A, EPO, FOXP3, IRF1, IRS2, MEF2C, NCK2, NCSTN, SATB1, SELENOK, STAT5B, ZBTB7B, IGFBP2, IL23A, SDC4
GO:0043112	receptor metabolic process	0.0155083	1.60959	29	AP2B1, APOE, ARF1, ATXN2, CDK5, CLTC, DLG4, EZR, GRB2, HDAC1, HDAC6, HIF1A, HNRNPK, MYLIP, NEDD4, NR1H3, PPARA, PPARG, PSEN1, SYK, ADIPOQ, BECN1, CXCL8, DKK1, EFNB2, MAGI2, UBQLN2, CAMLG, TBC1D16
GO:0071604	transforming growth factor beta production	0.0155719	2.53927	9	CREB1, HIF1A, MYB, SMAD3, SMAD4, SERPINB7, FOXP3, GATA6, THBS1
GO:1903034	regulation of response to wounding	0.016256	1.67057	25	APOE, CDKN1B, CRK, F2RL1, FOXA2, HBEGF, HMGB1, KRT1, NOS3, PDGFB, PLAT, PLAU, PLG, PPARD, PRKCA, PRKCD, PTEN, SMAD3, SPP1, SYK, KLF4, MAP2K1, MTOR, MYOD1, THBS1
GO:0043087	regulation of GTPase activity	0.0171852	1.35571	63	A2M, ADAP1, AGAP1, ARHGAP8, ARHGDIA, ARHGEF11, ARHGEF12, BCL6, CCL15, CCL16, CCL5, CCL7, CCL8, CRK, ECT2, ERBB2, EZH2, F2RL1, GNB5, GPS1, GPS2, GSK3B, JUN, PIN1, PKP4, RABEP1, RACK1, RANGAP1, RDX, RGS2, RIN3, SEC13, SPRY2, TSC1, WNK1, WNT5A, CCL14, CCL2, CCL23, CCL26, CCL3, CD40, DLC1, EPHB3, GDI1, MAPRE2, MLST8, MTOR, RGS1, RIN1, TRAPPC6A, TRAPPC6B, TSC2, CCL13, FAM13B, LIMS1, MYO9A, PLXNC1, RAB…
GO:0031348	negative regulation of defense response	0.0206544	1.57516	29	A2M, APOE, CRK, GPS2, HTRA1, KRT1, NFKB1, NR1H3, PLA2G5, PPARA, PPARD, PPARG, PRKCD, RB1, SELENOS, SMAD3, ADIPOQ, ETS1, FOXP3, KLF4, NR1H2, NR1H4, PDCD4, RORA, SIRT2, ZC3H12A, CDH5, PPM1B, TARBP2
GO:0021953	central nervous system neuron differentiation	0.0206997	1.58881	28	CDK5, CRK, CTNNB1, GATA2, MAPT, NKX2-1, PSEN1, PTEN, SHANK3, SOX4, TAL1, WNT5A, ASCL1, ATF5, DKK1, DMRT3, EPHB3, FZD1, GABRB1, HERC1, HOXD10, NR4A2, OLIG2, PAX6, PROX1, RORA, GSX1, OGDH
GO:0032602	chemokine production	0.0211286	1.92856	15	ERBIN, F2RL1, HIF1A, HMGB1, MBP, WNT5A, ADIPOQ, CD74, EGR1, KLF4, MAP2K5, NR1H4, SELENOK, TWIST1, LBP
GO:0042982	amyloid precursor protein metabolic process	0.0214275	2.19074	11	ADAM10, APH1A, APOE, APP, CASP3, PRNP, PSEN1, TMCC2, NCSTN, PSENEN, ITM2C
GO:0051262	protein tetramerization	0.0214328	1.69284	22	APIP, CCL5, DCTPP1, GNMT, GOLGA2, IMPDH2, KRT1, NUDT21, PCBD1, RXRA, TK1, TP53, XRCC6, USP16, CD74, CD79A, CUTC, ST13, TP63, TP73, DCXR, KCNJ2
GO:0034113	heterotypic cell-cell adhesion	0.0217787	2.10146	12	CXADR, DSC2, DSG2, DSP, JUP, MBP, PKP2, WNK1, CTNNA3, ADIPOQ, KLF4, MAP2K5
GO:0090150	establishment of protein localization to membrane	0.0218684	1.42783	44	BAD, BAG6, BCL2, BLZF1, CALM1, CASP8, CDK5, E2F1, EGFR, ERBB2, GOPC, GORASP1, GORASP2, GRIP1, KRT18, PDZK1, PRKCI, PRNP, RACK1, RPL5, SFN, SGTA, STX1B, TP53, YWHAB, YWHAG, YWHAQ, YWHAZ, CIB1, GDI1, MAPK8, RAB11A, RPL23A, RPL27, RPS15, TP63, TP73, YWHAE, YWHAH, PARD3, REEP2, RPL19, RPS24, RPS4Y1
GO:2000273	positive regulation of signaling receptor activity	0.0219699	2.40562	9	ADRB2, APP, CDK5, NLGN3, SHANK3, TAL1, BUD31, FBXW7, NCOA3
GO:0008356	asymmetric cell division	0.0227811	3.04712	6	GOLGA2, ZBTB16, FGF13, ING2, PAX6, PARD3
GO:0023019	signal transduction involved in regulation of gene expression	0.0227811	3.04712	6	SMAD2, SMAD3, HNF4A, NEUROD1, PAX6, TBX6
GO:0043586	tongue development	0.0227811	3.04712	6	CTNNB1, EGFR, HAND2, HDAC1, LEF1, HOXC13
GO:0007292	female gamete generation	0.0229443	1.68012	22	AURKA, BCL2, CCNB1, CTNNB1, FOXO3, KMT2B, MLH1, NOS3, PGR, PLK1, RGS2, SIRT1, SPIRE1, SRC, TRIP13, DMC1, FOSL1, MEI4, SIRT2, TOB2, TTK, MASTL
GO:0048013	ephrin receptor signaling pathway	0.0230966	1.90445	15	ACTB, AP2B1, ARPC3, CDC42, CRK, ITSN1, RAC1, RHOA, SRC, YES1, EFNB2, EPHB3, EPHB6, NCK2, SS18
GO:0045023	G0 to G1 transition	0.0233203	2.25713	10	BRCA1, CHEK1, E2F1, EED, EZH2, MAX, DUX4, MDM4, RNF2, CDK3
GO:0031589	cell-substrate adhesion	0.0237016	1.4073	46	ABL1, ACTN1, ATXN3, BCL2, BCL6, CDC42, CDK5, CDK6, CRK, CTNNB1, DAG1, FLNA, FN1, GSK3B, JUP, L1CAM, NF2, NOTCH1, PDPK1, PLAU, PLG, PPARD, PRKCZ, PTEN, PTN, RAC1, RHOA, SMAD3, SRC, TRIP6, TSC1, FER, CCL28, CDKN2A, CIB1, CTTN, DLC1, EPHB3, PIK3R1, SORBS3, SRF, LIMS1, MELTF, SDC4, THBS1, VWF
GO:0002791	regulation of peptide secretion	0.024131	1.33819	61	ABL1, ARF1, ARNTL, ATP13A2, BAD, CACNA1A, CCL5, CLOCK, EGFR, ENSA, EZR, F2RL1, FN1, FOXA2, GAPDH, GLUL, HIF1A, HMGB1, IRF3, IRS1, MAPK14, MAPK3, MBP, NR1H3, PAEP, PML, PPARD, PRKCA, PRKCZ, SOX4, SRC, SYK, TCF7L2, TRAF2, TRAF6, TRIM27, WNT5A, CASP1, CCL3, CD40, CD74, CHUK, FOXP3, FZD5, HNF4A, IRS2, NEUROD1, NR1H2, NR1H4, OXCT1, PAX8, SELENOK, SREBF1, TWIST1, ZC3H12A, BAIAP3, FCN1, GPR27, SSTR5, TL…
GO:0031128	developmental induction	0.0274751	2.46232	8	AR, CTNNB1, NKX2-1, DKK1, FGFR1, FZD5, GATA5, SOX9
GO:0044380	protein localization to cytoskeleton	0.0274751	2.10807	11	AURKA, GSK3B, MID2, NUP62, CEP192, CEP72, HNRNPU, MAPRE2, MARK4, MID1, TTK
GO:0048008	platelet-derived growth factor receptor signaling pathway	0.0274751	2.10807	11	ABL1, HGS, IFT20, PDGFB, PLAT, PTEN, SGPL1, SRC, FER, ADIPOQ, NR4A3
GO:0010324	membrane invagination	0.0274751	2.03141	12	ALKBH4, ARF1, CDC42, CHMP2A, F2RL1, GATA2, HGS, PPARG, RHOA, SPIRE1, BECN1, THBS1
GO:0007398	ectoderm development	0.0284826	2.90202	6	CTNNB1, KRT6B, NF2, ETS2, ZBTB17, ZBTB7B
GO:0036119	response to platelet-derived growth factor	0.0284826	2.90202	6	CREB1, PTN, RDX, SRC, YES1, FER
GO:0061311	cell surface receptor signaling pathway involved in heart development	0.0285377	2.63331	7	CTNNB1, HAND2, NOTCH1, WNT5A, DKK1, NOTCH2, SNAI1
GO:0051656	establishment of organelle localization	0.0285377	1.31589	64	AP1M2, AP3S1, ARF1, BACE1, CALM1, CCNB1, CDC42, CDK5, CHMP2A, CTBP2, CTNNB1, CUL3, DCTN1, EZR, GATA2, GEM, GOLGA2, GORASP1, GSK3B, HIF1A, MAPT, MLH1, NDE1, NEFL, NPM1, NUP62, PDPK1, PRKCZ, PSEN1, RAB3A, RAN, RAP1B, SEC13, SPIRE1, SPRY2, STX1B, SYK, SYT17, TERF1, TRAPPC3, VPS18, YWHAZ, AP3B2, FER, TRAPPC2L, APBA1, BECN1, BLOC1S2, CDT1, DTNBP1, HNRNPU, NR4A3, PAX6, PRKCB, RAB11A, RPS15, SHROOM2, TR…
GO:0034765	regulation of ion transmembrane transport	0.0286269	1.33585	58	ABL1, ADRB2, AKAP9, AKT1, APP, ARF1, CACNA1A, CALM1, DLG4, FLNA, GEM, GNB5, GOPC, HAMP, MAPK8IP2, NEDD4, NLGN3, OXSR1, PDPK1, PDZK1, PRKACA, PRNP, PSEN1, PTEN, RGS2, RIPK1, RYR2, S100A1, SHANK3, SNTA1, SUMO1, UBQLN1, WNK1, YWHAQ, KCNQ3, EPO, IRS2, KCNIP1, KCNIP3, KCNIP4, KCNQ2, KCNQ4, KCNQ5, MEF2C, MTOR, PPARGC1A, PTPN3, SCN1A, TWIST1, YWHAE, YWHAH, CLIC2, JPH2, KCNA1, KCNJ2, KCNN2, SLMAP, THBS1
GO:0051341	regulation of oxidoreductase activity	0.0295002	1.8057	16	ABL1, AKT1, APOE, CALM1, DDAH2, ECSIT, EGFR, HDAC6, HIF1A, NFKB1, NOS3, S100A1, TERF2, CYGB, VDR, GNAI2
GO:0097485	neuron projection guidance	0.0297131	1.44543	37	APP, BMPR2, CDK5, CRMP1, DAG1, ERBB2, ETV1, EZR, GRB2, GRB7, L1CAM, MAPK1, MAPK3, NKX2-1, PRKCA, RPS6KA5, SHANK3, SHC3, SMAD4, SRC, WNT5A, DAB1, DOK5, EFNB2, EMB, EPHB3, IRS2, LHX2, NR4A3, OTX2, PAX6, PIK3R1, CXCL12, PLXNC1, SEMA6A, TUBB3, UNC5B
GO:0035418	protein localization to synapse	0.030612	1.99811	12	ADAM10, CDK5, DAG1, DLG4, GRIP1, HSPB1, MAPT, PRKCZ, STX1B, TERF2, WNT5A, RAB11A
GO:0070206	protein trimerization	0.0307715	2.06903	11	GNB1, NUP62, SMAD4, TCL1A, TRAF2, TRIM27, WIZ, ADIPOQ, CD74, LCN2, TRIM21
GO:0032102	negative regulation of response to external stimulus	0.0307715	1.39985	43	APOE, BACE1, CDKN1B, CRK, GPS2, HTRA1, KANK2, KRT1, NFKB1, NOS3, NOTCH1, NR1H3, PDGFB, PLA2G5, PLAT, PLAU, PLG, PPARA, PPARD, PPARG, PRKCD, PTEN, RB1, SELENOS, SMAD3, SPP1, WNT5A, ADIPOQ, CCL2, ETS1, FOXP3, KLF4, NR1H4, PDCD4, RORA, SIRT2, ZC3H12A, CDH5, NUCB2, PPM1B, SEMA6A, TARBP2, THBS1
GO:0050663	cytokine secretion	0.0319289	1.49227	31	ABL1, EZR, F2RL1, FN1, GAPDH, HMGB1, IRF3, MAPK14, MAPK3, MBP, NOTCH1, PAEP, PML, PRKCZ, SRC, SYK, TRIM27, WNT5A, CASP1, CCL3, CHUK, FOXP3, FZD5, NR1H4, SELENOK, TWIST1, ZBTB7B, ZC3H12A, CHI3L1, FCN1, TLR8
GO:0006970	response to osmotic stress	0.0320366	1.87104	14	BAD, CASP3, EGFR, OXSR1, PDPK1, TSC22D2, TSC22D4, XRCC6, SLC12A5, AQP1, BDKRB2, EPO, LRRC8D, TSPO
GO:0044262	cellular carbohydrate metabolic process	0.0336647	1.42424	38	AKT1, BAD, FOXA2, FOXO1, GCKR, GNMT, GSK3B, HMGB1, IRS1, KAT2A, KAT2B, MYOG, NAGK, NCOA2, PPARA, PPP1CA, PPP1CB, PPP1CC, PTEN, SELENOS, SIRT1, SRC, STAT3, XYLB, ADIPOQ, DYRK2, GAA, IRS2, MTOR, PCK2, POMC, PPARGC1A, PPP1R3A, RORA, FBP2, HAS3, PCDH12, PDK2
GO:0043583	ear development	0.0337396	1.48523	31	BCL2, CDKN1B, DLL1, GATA2, GJB2, IFT20, MAF, MAPK1, MAPK3, MCM2, NOTCH1, SPRY2, TFAP2A, ZEB1, WNT5A, CEBPA, FGFR1, HOXA1, KCNQ4, NEUROD1, NR4A3, PAX8, PDZD7, PROX1, ROR2, SHROOM2, SOX9, TWIST1, WHRN, ZIC1, SDC4
GO:0018195	peptidyl-arginine modification	0.0339321	2.53927	7	CARM1, PRMT1, PRMT6, FBXO11, NR1H4, PRDM4, PRMT2
GO:0006090	pyruvate metabolic process	0.0344209	1.67812	19	ARNT, GAPDH, GCKR, HIF1A, MLXIPL, MYOG, PDHB, PPARA, PRKAA1, PRKAA2, STAT3, NCOR1, NR4A3, PCK2, PDHX, PPARGC1A, GSTZ1, OGDH, PDK2
GO:0006968	cellular defense response	0.0344209	2.03141	11	RELA, BECN1, CCR9, DCDC2, FOSL1, VEZF1, ZNF148, CD300C, KLRC2, KLRC3, LBP
GO:0043954	cellular component maintenance	0.0344209	2.03141	11	APOE, ARF6, CTBP2, DCTN1, F2RL1, KIFC3, PKP2, PRNP, RAB3A, CTTN, WHRN
GO:0070841	inclusion body assembly	0.0345043	2.77011	6	HDAC6, MAPT, TRIM37, VCP, BAG3, UBD
GO:0050803	regulation of synapse structure or activity	0.0345725	1.47071	32	ABL1, ADAM10, APOE, APP, ARF6, CDC42, CDK5, DAG1, DCTN1, EEF2K, MAPK14, NEDD4, NLGN3, PRNP, PTEN, PTN, RHOA, SHANK3, STX1B, VCP, YWHAZ, WNT5A, CFL1, DKK1, EPHB3, FZD1, MEF2C, PPP1R9A, SYNDIG1, ANAPC2, DBN1, TUBB
GO:0097696	STAT cascade	0.0374147	1.57846	23	CCL5, HGS, IL7R, NF2, NOTCH1, PIAS1, STAMBP, STAT1, STAT3, STAT5A, FER, BCL3, CCL2, CD40, CTF1, DAB1, EPO, ERCC6, NEUROD1, STAT2, STAT5B, IL23A, PWP1
GO:0032623	interleukin-2 production	0.0377942	1.93468	12	ABL1, CARD9, EZR, KAT5, PRNP, RUNX1, TRAF2, TRAF6, TRIM27, FOXP3, NR1H4, STAT5B
GO:0030258	lipid modification	0.0382144	1.39616	40	AKT1, APOE, CYP2C8, EGFR, ERBB2, ERBB3, ESR1, ETFA, FGFR4, GCDH, GRB2, HBEGF, IRS1, MAPK14, NRG2, PDGFB, PPARA, PPARD, PPARG, PRKAA1, PTEN, RAC1, SRC, TYSND1, CYGB, ADIPOQ, DECR2, FGFR1, IRS2, MTOR, NR4A3, PIK3R1, PIK3R3, PPARGC1A, SPHK1, TWIST1, HADHA, HIBCH, HSD17B4, ICOS
GO:0050000	chromosome localization	0.0385849	1.82306	14	CCNB1, CHMP2A, CUL3, GEM, MLH1, NDE1, NUP62, NUP98, TERF1, BECN1, CDT1, HNRNPU, RAB11A, MIS12
GO:0015850	organic hydroxy compound transport	0.0386891	1.43892	34	ACTB, APOE, AQP7, GPS2, MYB, NCOA1, NCOA2, NFKB1, NFKBIA, NR1H3, PPARG, RXRA, SIRT1, SPP1, SREBF2, SYK, SYT17, ADIPOQ, AQP1, DTNBP1, EMB, GRAMD1A, NR1H2, NR1H4, POMC, SLC10A1, SLC10A6, SLC18A1, STX12, TMF1, VIP, CXCL12, RELCH, TSPO
GO:0050727	regulation of inflammatory response	0.0387431	1.35052	48	A2M, APOE, APP, ATM, BCL6, BIRC2, BIRC3, C1R, CCL5, CEBPB, CLOCK, EGFR, ESR1, GPS2, IRF3, KRT1, MAPK14, NFKB1, NFKBIA, NR1H3, PLA2G5, PPARA, PPARD, PPARG, PRKCD, RB1, RELA, SELENOS, SMAD3, WNT5A, ADIPOQ, CCL14, CCL3, CEBPA, CFH, ETS1, FOXP3, KLF4, NR1H4, PDCD4, RORA, STAT5B, ZC3H12A, CDH5, CFB, DNASE1, IL23A, LBP
GO:0048285	organelle fission	0.039738	1.30559	59	ATM, AURKA, BAG6, CCNB1, CCND1, CCND2, CDC6, CDKN1B, CHEK1, CHMP2A, CUL3, EPS8, FLNA, GOLGA2, IK, MAPT, MLH1, NDE1, NEK6, NUP62, PDGFB, PIN1, PLK1, POGZ, RAD54B, RAN, RB1, RHOA, SPIRE1, TERF1, TEX11, TOM1L1, TPX2, TRIP13, CEP192, USP16, WNT5A, BECN1, CCNE1, CDT1, CENPS-CORT, DMC1, HNRNPU, ING2, MEI4, MRE11, MSTO1, MYBL2, MZT1, PPARGC1A, RAB11A, RAD50, SIRT2, STAT2, TTK, L3MBTL1, MASTL, MIS12, MX1
GO:0055088	lipid homeostasis	0.0399731	1.62513	20	APOE, FGFR4, GCKR, MLXIPL, MYLIP, NR1H3, NR5A2, PPARG, PRKAA1, PRKAA2, SIRT1, SREBF2, CEBPA, FBXW7, HNF4A, IRS2, NR1H2, NR1H4, RORA, USF2
GO:0019932	second-messenger-mediated signaling	0.0407434	1.31362	56	ACKR2, ADRB2, AHR, APLP1, APOE, CALM1, DDAH2, EGFR, ERBB3, FHL2, GNB1, GSK3B, MAPT, NFATC2, NOS3, NR5A1, NR5A2, PDPK1, PDZD3, PRKAA1, PRKACA, PRKCA, PRNP, PTBP1, RGS2, RYR2, SYK, CCR1, AQP1, CALCA, CCL3, CCR4, CCR9, CIB1, CXCL8, DYRK2, EIF4EBP2, GUCY1A1, GUCY1B1, MTOR, NCALD, NEUROD1, NFATC1, PPP1R9A, SELENOK, SOX9, SPHK1, SPINK1, VIP, CLIC2, CXCR5, GNAI2, JPH2, P2RX4, PDK2, THBS1
GO:0031214	biomineral tissue development	0.0423642	1.55742	23	ADRB2, ATF4, BMPR2, CEBPB, FOXO1, HIF1A, NOS3, NOTCH1, PPARA, PTN, SMAD3, SPP1, TFAP2A, TFIP11, CCR1, CCL3, FAM20C, MEF2C, ROR2, SOX9, TWIST1, ACVR2B, DDR2
GO:0045861	negative regulation of proteolysis	0.0424321	1.35628	45	A2M, AKT1, APP, BAG6, BEX3, BIRC2, BIRC3, CDK5, CSNK2A1, GAPDH, GAS1, HDAC6, ITIH3, LEF1, MDM2, PLAT, PML, PRNP, PSEN1, RECK, RPL5, SFN, SGTA, SRC, TNFAIP8, UCHL5, RPS6KA1, SERPINB7, AQP1, CDKN2D, HERPUD1, KLF4, MAP2K5, NOL3, NR1H2, PAK2, PTPN3, SMARCC1, SPINK1, TRIM21, USP19, YWHAE, TFPI2, THBS1, WFDC2
GO:0002697	regulation of immune effector process	0.0424321	1.33295	50	A2M, BCL6, BIRC2, BIRC3, C1R, CRK, F2RL1, GATA2, HMGB1, HTRA1, IL7R, MAPK14, MAPK3, MLH1, MYB, PAXIP1, PDPK1, PRKCZ, STAT1, STAT6, SYK, TP53BP1, TRAF2, TRAF6, FER, WNT5A, CD40, CD74, CFH, ERCC6, FOXP3, FZD5, MSH6, NR4A3, PRAM1, PRKDC, RARA, SELENOK, SMAD7, STAT5B, ZBTB7B, ZC3H12A, CFB, DNASE1, IL23A, LBP, PPM1B, TARBP2, TMBIM6, TSPAN32
GO:0009112	nucleobase metabolic process	0.0424321	2.25713	8	KDM1A, MAPK1, PRTFDC1, MTOR, PAICS, UMPS, CPS1, GART
GO:0042476	odontogenesis	0.0426672	1.61223	20	ANKRD11, CTNNB1, FOXO1, HAND2, HDAC1, HTRA1, LEF1, NF2, PPARA, RHOA, RUNX2, TFAP2A, TRAF6, AQP1, CTNNA1, DMRT3, FAM20C, TP63, TWIST1, ACVR2B
GO:0051646	mitochondrion localization	0.0434577	2.1259	9	HDAC6, HIF1A, KAT2A, MAPT, MEF2A, NEFL, SYNJ2BP, MSTO1, TRAK2
GO:0007059	chromosome segregation	0.0444626	1.3673	42	ATM, BAG6, BRCA1, CCNB1, CDC42, CDC6, CHMP2A, CSNK2A1, CTNNB1, CUL3, ECT2, GEM, IK, MLH1, NDE1, NEK6, NR3C1, NUP62, OIP5, PLK1, POGZ, RAN, RB1, TERF1, TEX11, TRIP13, UBE2I, BECN1, CCNE1, CDT1, CENPS-CORT, DMC1, FBXW7, FEN1, HNRNPU, MEI4, MRE11, MSTO1, RAB11A, SIRT2, TTK, MIS12
GO:0031032	actomyosin structure organization	0.0446876	1.49044	27	ABL1, ALKBH4, CDC42, CUL3, ECT2, EPB41L4A, KRT19, MEF2A, NF2, RAC1, RHOA, SMAD3, SMAD4, SRC, TGFBR1, TSC1, DLC1, EPB41L3, MEF2C, MTOR, PIK3R1, PPP1R9A, PROX1, SORBS3, SRF, FHOD3, SDC4
GO:0006298	mismatch repair	0.0465023	2.36998	7	ABL1, HMGB1, MLH1, PCNA, TDG, MSH6, TP73
GO:0023061	signal release	0.0488477	1.29191	58	ARNTL, BACE1, BAD, CACNA1A, CALM1, CCL5, CDK5, CLOCK, CREB1, CTBP2, EGFR, ENSA, FOXA2, GLUL, GSK3B, HIF1A, HNF1A, IRS1, MYB, NKX3-1, PPARD, PRKCA, PSEN1, RAB3A, RAP1B, SMAD2, SMAD4, SOX4, SPP1, STX1B, SYT17, TCF7L2, VPS18, ADIPOQ, APBA1, DTNBP1, FGFR1, HNF4A, IRS2, MEF2C, NEUROD1, NR1H4, OXCT1, PAX8, POMC, PPP1R9A, PRKCB, SREBF1, TMF1, VIP, ACVR2B, BAIAP3, CHAT, GPR27, LIN7B, OTOF, PRRT2, SSTR5
GO:0097366	response to bronchodilator	0.0488477	1.99158	10	CALM1, CDK2, CRK, FOXO1, RGS2, TRAF2, AQP1, GUCY1B1, NR4A2, TRDMT1
GO:0031644	regulation of neurological system process	0.048987	1.58704	20	ADRB2, AKAP9, APP, CELF4, DAG1, DLG4, EIF4A3, NLGN3, NPTX1, NPTX2, NPTXR, PRKCZ, PTEN, SHANK3, SRC, STX1B, CCL3, MTOR, VIP, PARD3

## Sheet: Data File S5
Data File S5. List of all the Gene Ontology Cellular Component terms significantly associated with the HLHS interactome
Gene Ontology ID	Gene Ontology term	P-value	Enrichment ratio	Number of genes in the HLHS interactome	Genes in the HLHS interactome
GO:0005667	transcription factor complex	0	3.14335	124	AHR, ARNT, ARNTL, ATF4, ATF7IP, CARM1, CDK2, CDK4, CEBPB, CLOCK, CREB1, CTBP1, CTNNB1, E2F1, EP300, FOS, GTF2A1, GTF2B, GTF2F2, HAND2, HDAC1, HIF1A, HMGA1, HNRNPAB, HOXB9, JUN, JUNB, KAT2A, KAT5, KDM1A, LEF1, LMO2, MAX, MED4, MEF2A, MLXIPL, MYOG, NCOA6, NFATC2, NKX2-1, NPAS2, NR1H3, NR1I2, NR4A1, NR5A1, NR5A2, PPARA, PPARD, PPARG, RARG, RB1, REL, RELA, RUNX1, RUNX2, RUNX3, RXRA, SMAD1, SMAD2, SMA…
GO:0000790	nuclear chromatin	0	2.82377	107	ACTB, APPL2, AR, BRMS1, CBX8, CEBPB, CHD3, CREB1, CREBBP, CSNK2A1, CTNNB1, E2F1, EED, ESR1, EZH2, HAND2, HDAC1, HMGB1, HNRNPK, JUN, JUNB, KAT2A, KAT5, KDM1A, KLF1, MAX, MEF2A, MEF2D, MORF4L1, MUC1, MXD1, MYC, NCOA1, NFATC2, NR1H3, POGZ, PPARD, RARG, RB1, RELA, RUNX2, RUNX3, RUVBL2, RXRA, SAP130, SETD1A, SIRT1, SMAD2, SMAD3, SMAD4, SMARCB1, SMARCE1, SP1, SS18L1, STAT1, STAT3, STAT6, TAL1, TBP, TCF…
GO:0016607	nuclear speck	6.71289e-06	1.80922	77	AR, ASCC2, BARD1, BAZ2A, BCAS2, CDC5L, CKAP4, CSNK1A1, EIF4A3, ELL, ERBIN, HDAC5, HIF1A, IK, LMNA, MAPK14, MAPT, MORF4L1, NEK6, NR3C1, OIP5, PATL1, PCBP1, PIAS1, PIN1, POLDIP3, PPP1CC, PPP1R8, PRKAA1, PRKAA2, PRKACA, PRPF3, RBM10, RBM15B, RUFY1, SAP130, SARNP, SETD1A, SNW1, SUMO1, TCF12, TCF3, TFIP11, ZBTB16, CYGB, APEX1, CWC15, CXXC1, DDX17, DDX39A, DDX39B, EPAS1, GLIS2, HBP1, HNRNPU, HOXB2, MAM…
GO:0098687	chromosomal region	0.000233677	1.74001	64	ATM, ATR, AURKA, CCNB1, CDK1, CDK2, CEBPB, CHEK1, CSNK1A1, DCTN1, DYNLT3, FBXO28, KANSL1, KAT2B, KDM1A, LRIF1, MCM2, NDE1, NUP98, OIP5, ORC2, PCNA, PLK1, PML, POT1, PPP1CA, PPP1CB, PPP1CC, PPP2R5C, PSEN1, RANGAP1, SEC13, SS18L1, SUV39H1, TERF1, TERF2, TFIP11, TP53BP1, UPF1, XRCC6, KAT8, APEX1, CDT1, CENPS-CORT, DMC1, FEN1, HNRNPU, MCM3, MCM4, MCM5, MRE11, NBN, ORC5, PRKDC, RAD50, RECQL4, SIRT2, S…
GO:0035770	ribonucleoprotein granule	0.000233677	1.93439	46	ACTB, AGO2, ARNTL, ATXN2, BARD1, CARHSP1, CDC42, CKAP4, CLOCK, DCP1A, DCP2, FXR2, G3BP1, GRB7, HNRNPK, MAPT, PABPC1, PAN2, PAN3, PATL1, PCBP1, POLDIP3, PRKAA2, RAC1, RBPMS, SARNP, SMN1, SUMO1, UPF1, UPF2, VCP, RPTOR, AGO1, DCP1B, EID1, HNRNPU, HOXD10, POLI, POLR2G, TAF5L, TNRC6B, TRIM21, YBX1, ZC3H12A, TNRC6C, TUBB
GO:0005819	spindle	0.000233677	1.72849	63	AKT1, APP, AURKA, CALM1, CCNB1, CDC42, CDC6, CDK1, CLTC, CRMP1, CTNNB1, CUL3, DCTN1, DYNLT3, ECT2, FAM110A, FAM161A, GEM, GOLGA2, HSPB1, IK, KAT2A, MAPK1, MAPK14, NDE1, NEK6, NPM1, NR3C1, NUP62, PKP4, PLK1, POLB, RANGAP1, RASSF1, RB1, SPAG8, STX1B, TERF1, TPX2, CTTN, DCDC2, HDAC3, HNRNPU, KATNAL1, LATS2, MAP2K5, MAPRE2, MID1, MZT1, NCOR1, NEDD1, NEIL2, RAB11A, RMDN3, SIRT2, TADA3, TTK, UNC119, WD…
GO:0016605	PML body	0.000486012	2.3634	26	ARNTL, ATR, CIITA, MAX, PATL1, PIAS1, PML, PTEN, RB1, SIRT1, SP3, SUMO1, SUMO2, TCF7L2, TDG, TDP2, THAP1, TP53, TRIM27, UBE2I, ZBTB16, MRE11, MTOR, NBN, PPARGC1A, SATB1
GO:0017053	transcriptional repressor complex	0.000615403	2.46404	23	APPL2, BAZ2A, CCND1, CHD3, CSNK2A1, CTBP1, CTBP2, GPS2, HDAC1, HMGB1, JUN, SIRT1, SP1, SP3, SUV39H1, YWHAB, ZBTB16, CDX2, CHD4, HDAC3, NCOR1, SIRT2, CORO2A
GO:0030055	cell-substrate junction	0.000882235	1.57649	72	ACTB, ACTN1, ADAM10, APBB1IP, ARF1, ARF6, ARPC3, CDC42, CLTC, CTNNB1, DAG1, EGFR, ERBIN, EZR, FHL2, FLNA, FLNB, G3BP1, GNB2, GRB7, HMGA1, HNRNPK, HSPB1, IRF2, JAK1, JUP, L1CAM, LAMTOR3, LASP1, MAPK1, MAPK3, MDC1, MSN, NPM1, PABPC1, PDPK1, PLAU, PPP1CB, PPP1CC, RAC1, RDX, RHOA, RPL5, SLC9A3R2, SVIL, TNS2, TRIP6, VIM, YES1, YWHAB, YWHAG, YWHAQ, YWHAZ, CFL1, CTNNA1, CTTN, DLC1, EFNB2, FZD1, MAP2K1, …
GO:0034708	methyltransferase complex	0.000882235	2.1722	28	EED, EZH2, HCFC2, KANSL1, KMT2A, KMT2B, MAX, NCOA6, PAGR1, PAXIP1, PHF1, POGZ, PRMT1, RBM15B, RUVBL2, SETD1A, SIRT1, TRIM37, KAT8, ASH2L, CXXC1, KMT2C, METTL1, PELP1, PRDM4, RNF2, SENP3, WDR82
GO:0030427	site of polarized growth	0.00200325	1.8974	35	ABI1, APP, ARPC3, CALM1, CDK5, CXADR, EPS8, L1CAM, MAPT, NEFL, NPTX2, NPTXR, PSEN1, PTBP2, STMN2, TRPC5, TSC1, AUTS2, CCDC120, CIB1, CTNND1, CTTN, DTNBP1, FGF13, MAP3K12, OTX2, PPP1R9A, SIRT2, TSHZ3, WHRN, YWHAE, DBN1, NRSN1, PARD3, TRAK2
GO:0033267	axon part	0.00209048	1.56402	65	ABI1, AP3S1, APP, ARPC3, AURKA, CALM1, CDK5, CXADR, DAG1, DLG4, ELK1, EPS8, GLUL, HIF1A, HSPB1, ITSN1, L1CAM, MAPT, MBP, NEFL, NPTX2, NPTXR, PDYN, PRKCZ, PSEN1, PTBP2, RAB3A, RANGAP1, STMN2, TERF2, TPX2, TRPC5, TSC1, AP3B2, KCNQ3, AUTS2, BLOC1S2, CALCA, CCDC120, CD40, CIB1, CTNND1, CTTN, DTNBP1, EPB41L3, FGF13, KCNIP3, KCNQ2, MAP3K12, OTX2, PPP1R9A, PRKCB, SCN1A, SIRT2, SLC18A1, TSHZ3, WHRN, YWHA…
GO:0034399	nuclear periphery	0.00343469	1.96221	29	ATF4, ATXN1, ATXN3, CEBPB, CSNK2B, DAG1, LMNA, LRIF1, MAPT, MYB, NUP98, PAXIP1, PML, PRKCD, PRKCZ, RUNX1T1, RUVBL2, SNW1, SUV39H1, TP53, VIM, YY1, KAT8, CFL1, CXXC1, DDX39B, HNRNPU, SATB1, TGFB1I1
GO:0000791	euchromatin	0.0071243	2.9997	11	CREB1, CTNNB1, JUN, RUVBL2, SIRT1, TBP, ASH2L, KLF4, NR1H4, PPARGC1A, RNF2
GO:0000118	histone deacetylase complex	0.00726485	2.39976	16	APPL2, BRMS1, CHD3, CSNK2A1, HDAC1, HDAC5, HDAC6, MORF4L1, SAP130, TAL1, CHD4, HDAC3, ING2, NCOR1, TRERF1, MECOM
GO:0043025	neuronal cell body	0.00772621	1.42578	77	ABL1, ADAM10, AKAP9, APOE, APP, ATP13A2, AURKA, BACE1, BMPR2, CACNA1A, CASP3, CDC42, CDK5, DCTN1, EIF4A3, ELK1, FLNA, FXR2, G3BP1, GLUL, HDAC1, HDAC6, L1CAM, MAPK1, MAPK8IP2, MAPT, MBP, NPTX2, NPTXR, PDPK1, PDYN, PHAX, PPP1CA, PRKAA1, PRKAA2, PRKCZ, PSEN1, PTBP2, RACK1, SMN1, SRD5A2, STMN2, TPX2, TRPC5, CYGB, RPTOR, ASCL1, CALCA, CCR4, CD40, CIB1, CTNND2, DAB1, FZD5, GDI1, MAP2K4, MTOR, NGB, PPAR…
GO:0044445	cytosolic part	0.00772621	1.62279	44	AHR, BAG6, CASP10, CASP8, CTBP2, CYB5R3, DAG1, EIF4A3, FXR2, HBA1, IKBKB, KXD1, NEDD4, PIN1, PTEN, RACK1, RIPK1, RPL5, SGTA, TSC1, UBQLN4, UCHL5, BLOC1S2, CASP1, CASP4, CCT4, CHUK, DTNBP1, GUCY1A1, GUCY1B1, HPS6, MTOR, PPARGC1A, PRKCB, RPL23A, RPL27, RPS15, STX12, TSC2, CCT8, DBN1, RPL19, RPS24, RPS4Y1
GO:0016234	inclusion body	0.00795888	2.16434	19	ATF4, ATXN1, ATXN3, HDAC6, MAPT, NUP98, PRNP, PSEN1, RANGAP1, RNF32, TDP2, TRIM37, UBQLN1, ZDHHC17, BAG3, EEF2, HERPUD1, NBN, UBD
GO:0032993	protein-DNA complex	0.00825352	1.7667	32	BCAS2, CDC5L, CTNNB1, EP300, ESR1, FOS, GTF2B, GTF2F2, JUP, LEF1, MAX, MYOG, NPM1, PCNA, POLA2, POT1, SP1, SP3, TBP, TCF7L2, TERF1, TERF2, XRCC6, DDIT3, JUND, KCNIP3, MCM3, NFYB, NUPR1, POLD2, PRKDC, ZBTB17
GO:0032153	cell division site	0.00991716	2.21717	17	ARF6, ECT2, NDE1, NF2, PPP1CC, RDX, RHOA, SPIRE1, STAMBP, SVIL, FSD1, MZT1, RAB11A, WDR73, KIF20A, MASTL, RND1
GO:0045111	intermediate filament cytoskeleton	0.0137956	1.59036	41	CSNK1A1, DCTN1, DISC1, DSP, GFAP, JUP, KRT1, KRT13, KRT15, KRT18, KRT19, KRT31, KRT40, KRT5, KRT6A, KRT6B, KRTAP10-3, LMNA, NDOR1, NEFL, NME1, NR1I2, PKP2, TCHP, VIM, ING4, KRT16, KRT17, KRT25, KRT26, KRT27, KRT28, KRT35, KRT36, KRT38, KRTAP11-1, CCT8, FAAP100, KRT3, KRT7, PRPH
GO:0061695	transferase complex, transferring phosphorus-containing groups	0.0137956	1.5589	44	CCNB1, CCND1, CCND2, CDK1, CDK2, CDK4, CDK5, CDK6, ERN1, GTF2A1, GTF2B, GTF2F2, IKBKB, IRS1, KAT2A, PAF1, POLA2, PRKAA1, PRKAA2, PRKAB2, RB1, SNW1, TBP, TGFBR1, TP53, VAC14, BECN1, CCNE1, CDKN2D, CHUK, MAP3K5, MCM3, NRBF2, PIK3R1, PIK3R3, POLD2, POLR1C, POLR2G, POLR3C, POLR3D, TADA3, TAF5L, ACVR2B, POLR3B
GO:0005911	cell-cell junction	0.0142016	1.40802	69	ACTN1, AKT1, APP, AQP7, BMPR2, CCND1, CDH1, CDK4, CTNNB1, CXADR, DAG1, DSC2, DSC3, DSG1, DSG2, DSP, ECT2, FGFR4, FLNA, GJB2, GRB2, HAMP, JUP, KIFC3, KRT18, PDZD3, PKP2, PKP4, PPP1CA, PRKCD, PRKCI, PRKCZ, RAP1B, RDX, RHOA, TCHP, TGFBR1, TRIM29, CTNNA3, ANKRD23, CDSN, CFL1, CTNNA1, CTNND1, CTNND2, EPB41L3, FGF13, FZD5, GJA8, MAGI1, MAGI2, MAGI3, PARD3B, PIK3R1, PKP3, SCN1A, SHROOM2, SIRT2, SMAD7, S…
GO:0043209	myelin sheath	0.0313296	1.65173	29	ARF6, BCL2, CALM1, DLST, ERBB2, EZR, GFAP, GLUL, GNB1, GNB2, GNB5, IMMT, MBP, MSN, NEFL, NME1, PRKCI, PRKCZ, PTEN, RDX, STIP1, UBC, VCP, YWHAG, GDI1, SIRT2, TUBA1B, CKB, TUBB4B
GO:0098978	glutamatergic synapse	0.0329483	1.41415	55	ACTB, ACTN1, ADAM10, AKAP9, AP2B1, APOE, ARF1, ARF6, CDH1, CDK5, CTBP1, CTBP2, DAG1, EIF4A3, EPS8, ERBIN, FLNA, GRIP1, GSK3B, KPNA2, MAPK14, NEDD4, NLGN3, NPTX1, NPTX2, NPTXR, PIN1, PLAT, PPP1CA, PPP1CC, PRKCI, PRKCZ, RAC1, RELA, RHOA, SRC, STAT3, VCP, VPS18, YES1, YWHAZ, WNT5A, APBA1, CTNND1, DTNBP1, EFNB2, GUCY1A1, MTOR, PAK2, PPP1R9A, RAB11A, YWHAE, YWHAH, DBN1, KCNA1
GO:0030496	midbody	0.0488246	1.57879	30	ALKBH4, ARF6, AURKA, CDC42, CDK1, CRMP1, ECT2, EXOC5, GEM, NUP62, PIN1, PKP4, PLK1, PPP1CC, RACK1, RAN, RDX, RHOA, SVIL, TSG101, WIZ, BCL3, CTNND1, DTNBP1, GDI1, HNRNPU, MARK4, SIRT2, GNAI2, KIF20A

## Sheet: Data File S6
Data File S6. List of all the Gene Ontology Molecular Function terms significantly associated with the HLHS interactome
Gene Ontology ID	Gene Ontology term	P-value	Enrichment ratio	Number of genes in the HLHS interactome	Genes in the HLHS interactome
GO:0001228	DNA-binding transcription activator activity, RNA polymerase II-specific	0	3.33948	154	AR, ARNTL, ATF4, CDC5L, CEBPB, CLOCK, CREB1, CREB3, CRX, E2F1, ELK1, EP300, ERG, ESR1, ESRRG, ETV1, FOS, FOXO3, GATA2, HAND2, HIF1A, HNF1A, HNF4G, HNRNPK, HOXB6, IKZF3, IRF2, IRF3, IRF5, JUN, JUNB, KLF1, KLF5, LEF1, LMO2, MAF, MEF2A, MEF2D, MITF, MYB, MYC, MYOG, NFATC2, NFKB1, NOTCH1, NR1I2, NR3C1, NR4A1, NR5A2, PGR, PPARA, REL, RELA, RUNX1, RUNX2, SIRT1, SMAD1, SMAD2, SMAD3, SMAD4, SOX4, SP1, SP…
GO:0003713	transcription coactivator activity	0	3.38203	111	ACTN1, ARNT, BIRC2, BRCA1, CARM1, CIITA, COPS5, CREBBP, CTBP2, CTNNB1, DTX1, EP300, ESR2, FHL2, GPS2, GRIP1, GTF2A1, HCFC2, HMGA1, HMGB1, JMY, JUN, JUNB, JUP, KAT2A, KAT2B, KAT5, KDM1A, MAGED1, MAX, MED4, MEF2A, NCOA1, NCOA2, NCOA6, NPM1, NR1H3, NR1I2, NR5A1, NUP98, PCBD1, PIAS1, PML, PPARA, PPARD, PPARG, RAN, RARG, RB1, RBPMS, RXRA, SERTAD2, SMARCB1, SMARCE1, SNW1, SOX4, SS18L1, SUB1, TADA2A, TC…
GO:0051427	hormone receptor binding	0	3.87218	74	ARID5A, BAZ2A, BRCA1, CEBPB, CRX, CTBP2, CTNNB1, DDX5, EP300, ESR1, FHL2, GRIP1, GTF2B, HIF1A, HMGA1, JAK1, JUP, KAT5, KDM1A, LEF1, LRIF1, MED4, NCOA1, NCOA2, NCOA6, NKX3-1, NR4A1, NUP62, PAGR1, PCNA, PIAS1, PPARG, RAN, RARG, RB1, RXRA, SIRT1, SMAD3, SMARCE1, SNW1, SRC, STAT1, STAT3, SUMO1, TCF7L2, TRIP6, ARID1A, BUD31, CCNE1, ETS2, FOXH1, JUND, MYOD1, NCOA3, NCOR1, NR1H2, NR1H4, NR4A2, NR4A3, PP…
GO:0035326	enhancer binding	0	4.01172	55	ACTB, AHR, ARNT, ARNTL, ATF4, BHLHE40, CLOCK, CREB1, GATA2, HDAC1, HMGA1, HOXB6, JUN, KMT2A, LEF1, NFKB1, NKX2-1, NPAS2, NR2F6, NR5A1, NR5A2, REL, RELA, RUVBL2, SIRT1, SMAD2, SMAD3, SMARCB1, SMARCE1, SPIB, TAL1, TCF12, TCF3, TP53, YY1, ZBTB16, CALCOCO1, CDX2, CHD4, FOXH1, GATA4, GATA5, GATA6, HMGB2, HOXB7, MEF2C, MEOX2, NFATC1, NFYB, NR1H4, SMARCC1, SOX9, TBX6, ZBTB7B, PROP1
GO:0003707	steroid hormone receptor activity	0	6.90318	38	AR, ESR1, ESR2, ESRRG, HNF4G, LEF1, NKX3-1, NR1H3, NR1I2, NR2F6, NR3C1, NR4A1, NR5A1, NR5A2, PGR, PPARA, PPARD, PPARG, RARG, RXRA, THRA, THRB, ESRRA, HNF4A, NR1H2, NR1H4, NR1I3, NR2F1, NR2F2, NR3C2, NR4A2, NR4A3, NR6A1, RARA, RARB, RORA, RXRB, VDR
GO:0098531	transcription factor activity, direct ligand regulated sequence-specific DNA binding	0	7.82285	39	AHR, AR, ESR1, ESR2, ESRRG, HNF4G, NKX3-1, NR1H3, NR1I2, NR2F6, NR3C1, NR4A1, NR5A1, NR5A2, PGR, PPARA, PPARD, PPARG, RARG, RXRA, STAT3, THRA, THRB, ESRRA, HNF4A, NR1H2, NR1H4, NR1I3, NR2F1, NR2F2, NR4A2, NR4A3, NR6A1, RARA, RARB, RORA, RXRB, SREBF1, VDR
GO:0019902	phosphatase binding	1.78905e-14	3.13725	58	AKT1, BAD, BCL2, CARHSP1, CDC5L, CDKN1B, CTNNB1, DLG4, EGFR, ELL, ENSA, ERBB2, FOXO1, GRB2, JAK1, JUP, KAT2A, MAPK1, MAPK14, MAPK3, MAPT, MVP, NFATC2, PPARA, PPARG, PPP1CA, PPP1CC, PPP1R18, RACK1, RPS6KB1, SLC9A3R2, SMAD2, SMAD3, STAT1, STAT3, STAT6, STRN4, SYK, TP53, TRAF2, VCP, WNK1, CEP192, FER, IRS2, MAGI2, MAP3K5, MAST2, PDLIM4, PIK3R1, PPP1R32, PPP1R9A, PTPA, SPHK1, SPRED1, TSC2, MASTL, PAR…
GO:0001085	RNA polymerase II transcription factor binding	2.34812e-14	3.43862	50	AHR, AR, ATF4, BHLHE40, CREB1, CREBBP, CTNNB1, DACT1, ELK1, EP300, ESR1, FOS, GSK3B, GTF2A1, HDAC1, HDAC5, JUN, LMO2, MEF2A, PPARA, PPARD, PPARG, RB1, RUVBL2, SMAD3, SMAD4, SP1, STAT3, TAL1, TBP, TCF4, TCF7L2, TP53, TP53BP1, YY1, CHD4, GATA4, GATA6, HNF4A, HNRNPU, KLF4, NCOR1, NEUROD1, NFATC1, PITX1, SRF, TBX6, TEAD1, TEAD2, ZFPM2
GO:0042826	histone deacetylase binding	8.56709e-12	3.50114	40	BRMS1, CCND1, CEBPB, DACT1, DNMT3B, HDAC1, HDAC5, HDAC6, HIF1A, KAT2A, KAT2B, KPNA2, LEF1, MEF2A, MEF2D, NKX3-1, NUDT21, PRDM1, RAC1, RELA, SP1, TAL1, TP53, TRAF6, YWHAB, YY1, CHD4, FOXP3, HDAC3, HOXA10, KLF4, MAPK8, MEF2C, NCOR1, RARA, SIRT2, SRF, YWHAE, ZBTB7B, GCM1
GO:0008022	protein C-terminus binding	8.56709e-12	2.8318	55	ABL1, AGO2, ATF4, ATXN1, ATXN2, CIITA, COIL, CTBP1, CTNNB1, DLG4, EP300, ERBB2, EZR, FN1, GRIP1, MDC1, NEFL, PABPC1, PDZD3, PIAS1, PPARG, PPP1CC, PRKAA1, RAB3A, RABAC1, SHANK3, SIRT1, SLC9A3R2, SNF8, SP1, SRC, SREBF2, STIP1, SUMO1, SYNJ2BP, TCF4, TERF2, UBE2I, VIM, XRCC6, YWHAB, YWHAQ, ZBTB16, CALCOCO1, CIB1, CITED1, ERCC6, MAGI1, MAP2K1, MRE11, PIAS3, PPP1R9A, EML2, MCHR1, PROP1
GO:0008013	beta-catenin binding	8.56709e-12	3.94405	34	AR, BTRC, CARM1, CDH1, CXADR, DACT1, EP300, ESR1, FOXO1, FOXO3, GRIP1, GSK3B, HDAC6, LEF1, PIN1, PSEN1, RUVBL2, SETD1A, SLC9A3R2, SMAD3, TCF7L2, CTNNA3, ASH2L, CALCOCO1, CTNNA1, CTNND2, KLF4, NR4A2, RORA, SHROOM2, SMAD7, SOX9, CDH5, PROP1
GO:0044389	ubiquitin-like protein ligase binding	1.02117e-11	2.39088	74	ABI2, ATXN3, AURKA, BAG6, BCL2, BLZF1, BRCA1, CASP10, CASP8, CCNB1, CEBPB, CUL2, CUL3, CUL4B, DTX1, EGFR, ERBB3, FAF1, FOXO1, GSK3B, HDAC6, HGS, HIF1A, JAK1, JUN, MDM2, NEK6, NFKBIA, OTUB1, PIAS1, PML, PRKACA, RANGAP1, RB1, RBX1, RELA, RIPK1, RPL5, SMAD2, SMAD3, SRC, STAT1, SUMO1, SUMO2, TP53, TRAF2, TRAF6, TRIM37, TSG101, UBC, UBE2D1, VCP, YWHAZ, BECN1, CD40, FBXW7, FZD5, MID1, MYOD1, PAX6, PPAR…
GO:0033613	activating transcription factor binding	1.45319e-11	4.05395	32	BHLHE40, CIITA, CREB1, CREBBP, CTNNB1, EP300, FOS, HAND2, HDAC1, JUN, LMO2, MEF2A, MEF2D, MYC, NEK6, NPM1, PPARG, PTMA, RB1, RELA, SMAD2, SMAD3, TP53BP1, GABPA, GATA4, HNF4A, HOXB4, HOXD4, MEF2C, NCOR1, NEUROD1, TBX6
GO:0035035	histone acetyltransferase binding	2.64153e-11	6.30808	19	CEBPB, CREB1, HIF1A, KANSL1, MEF2A, PCNA, SP1, STAT1, TP53, CITED2, EGR1, EID1, EPAS1, ETS1, FOXP3, NR4A3, PAX6, SIRT2, TRIP4
GO:0043425	bHLH transcription factor binding	1.57873e-10	6.18951	18	ARNTL, BHLHE40, CREBBP, KDM1A, LMO2, RUNX2, SIRT1, SMAD3, SP1, TCF12, TCF3, TCF4, UBE2I, ASCL1, FOXH1, SOX9, TWIST1, USF2
GO:0070888	E-box binding	3.00646e-10	4.6215	24	AHR, ARNTL, BHLHE40, CLOCK, HAND2, HDAC1, HIF1A, LMO2, MAX, MITF, MYC, MYOG, PPARG, SREBF2, TAL1, TCF12, TCF3, TCF4, ZEB1, ASCL1, MYOD1, NEUROD1, SNAI1, TWIST1
GO:0046982	protein heterodimerization activity	1.13069e-09	1.95443	95	AHR, ARF1, ARNT, ARNTL, ATF4, AURKA, BAD, BARD1, BCL2, BCL2L1, BHLHE40, CEBPB, CTNNB1, CUL3, EGFR, ERBB2, ERBB3, FOS, FXR2, GAD2, GTF2A1, HAND2, HIF1A, IKBKB, IKZF3, JDP2, JUN, KRT1, MAX, MEF2A, MEF2D, MID2, MLXIPL, MYOG, NEFL, NFKB1, NOTCH1, NOTCH4, NPM1, NR4A1, PAFAH1B3, PDGFB, POLA2, PPARD, PPARG, RAN, RELA, RXRA, SLC3A1, SMAD1, SMAD2, SMAD3, SMAD4, SOX4, TAL1, TCF12, TCF3, TCF4, TP53, ALX1, B…
GO:0051219	phosphoprotein binding	6.46627e-08	3.32824	28	ABL1, BTRC, CRK, GRB2, IRS1, MAPK1, MAPK3, MID2, NEDD4, PIN1, PLAT, PTPN5, RB1, SFN, SHC3, SRC, SYK, YES1, YWHAB, FBXW7, MID1, MTOR, NCK2, PIK3R1, PIK3R3, PTPN3, RRAGA, YWHAE
GO:0031490	chromatin DNA binding	2.18674e-07	2.9066	32	ACTB, BCL6, CLOCK, EP300, EZH2, FOXO3, HDAC1, HMGN1, HMGN2, MYOG, NOTCH1, PRDM1, RELA, RUVBL2, RXRA, SMAD3, SMARCB1, SMARCE1, STAT3, THRA, THRB, KDM3B, APEX1, CHD4, HNRNPU, HR, MYOD1, PPARGC1A, PRDM4, RARA, SMARCC1, SRF
GO:0004674	protein serine/threonine kinase activity	3.21319e-07	1.8227	85	AKT1, ARAF, ATM, ATR, AURKA, BMPR2, CCNB1, CCND1, CDC42, CDK1, CDK2, CDK4, CDK5, CDK6, CDKL3, CDKN1B, CHEK1, CLK1, CSNK1A1, CSNK2A1, CSNK2B, EEF2K, EGFR, ERN1, GSK3B, IKBKB, MAP3K14, MAP3K8, MAPK1, MAPK14, MAPK3, MAPK9, MAST1, NEK6, OXSR1, PDPK1, PLK1, PRKAA1, PRKAA2, PRKAB2, PRKACA, PRKCA, PRKCD, PRKCI, PRKCZ, RAC1, RIPK1, RPS6KA5, RPS6KB1, RPS6KB2, SRPK2, STK16, SYK, TGFBR1, WNK1, DYRK4, RPS6KA…
GO:0001047	core promoter binding	4.19077e-07	4.06521	19	AGO2, BAZ2A, CEBPB, EZH2, FOS, GTF2B, HDAC1, NPM1, NR3C1, RUVBL2, SMARCB1, STAT1, TBP, TP53, AGO1, PAX6, TAF1B, UBTF, ZBTB17
GO:0001221	transcription cofactor binding	4.23361e-07	4.22698	18	AHR, CDC5L, CREB1, ESR1, FOXO1, FOXO3, NEK6, PPARA, SUMO1, SUMO2, KLF4, NFATC1, NR4A3, RORA, TEAD1, TEAD2, ZBTB17, ZBTB49
GO:0070491	repressing transcription factor binding	4.23361e-07	3.2973	25	ARNTL, CTBP1, CTNNB1, GTF2A1, HDAC1, HDAC5, HMGB1, KAT5, MYC, PPARA, PPARD, PPARG, RELA, RUNX2, SP1, STAT1, STAT3, TBP, TCF3, TCF7L2, TLE1, YY1, CHD4, GATA6, NFYB
GO:0046332	SMAD binding	7.35771e-07	3.12914	26	BMPR2, CTNNB1, DDX5, EID2, FLNA, FOS, JUN, MEF2A, PML, SKIL, SMAD1, SMAD2, SMAD3, SMAD4, SNW1, TCF12, TGFBR1, YY1, CITED1, FOXH1, GATA4, MAGI2, PAX6, SMAD7, TGFB1I1, ACVR2B
GO:0004712	protein serine/threonine/tyrosine kinase activity	9.54474e-07	4.03038	18	AKT1, AURKA, CLK1, MAPK1, MAPK14, MAPK3, MAPK9, PRKAA2, PRKACA, RPS6KB1, DYRK4, RPS6KA1, DYRK2, MAP2K1, MAP2K4, MAP2K5, TTK, ACVR2B
GO:0097110	scaffold protein binding	1.56491e-06	3.48605	21	CASP8, CRK, DLG4, DLL1, DSP, IKBKB, KRT15, KRT18, KRT5, MAPK3, MDM2, NLGN3, NOS3, SHANK3, SRC, VIM, CHUK, MAP2K1, NCK2, UBTF, YWHAE
GO:0003684	damaged DNA binding	2.22853e-06	3.20938	23	BRCA1, CREBBP, CUL4B, EP300, HMGB1, PCNA, POLB, POT1, RAD23A, TDG, TP53BP1, XRCC6, APEX1, FEN1, HMGB2, MPG, MSH6, NBN, NEIL2, POLI, RECQL4, TP63, REV1
GO:0097718	disordered domain specific binding	1.30216e-05	4.4702	13	CALM1, CLTC, CTNNB1, EZR, FN1, GAPDH, MDM2, RB1, SMAD2, TP53, NCOA3, TEAD2, KCNA1
GO:0019207	kinase regulator activity	1.74675e-05	2.07665	44	ABI1, CALM1, CASP3, CCL5, CCNB1, CCND1, CCND2, CDK4, CDKN1B, CDKN2C, CSNK2B, ERBB3, FAF1, GMFB, HMGB1, HSPB1, ITSN1, KAT2B, LAMTOR3, NPM1, RACK1, SFN, SPRY2, TCL1A, TOM1L1, WNK1, YWHAG, RPTOR, CCNE1, CDKN2A, CDKN2B, CDKN2D, CIB1, EPO, ERCC6, FGF13, INCA1, KLF4, MAP2K1, MLST8, PAK2, PIK3R1, PIK3R3, SPRED1
GO:0047485	protein N-terminus binding	4.76496e-05	2.49961	27	ARF6, ATM, BIRC2, CALM1, CSNK2A1, EXOC5, HDAC1, MDM2, MORF4L1, NCOA1, PPP1CC, RELA, SMARCE1, SNF8, SUV39H1, TP53, TRAF6, TSC1, YWHAQ, ERCC6, MAP2K1, NBN, NCOA3, PIAS3, SMARCC1, TARBP2, VWF
GO:0051059	NF-kappaB binding	8.48274e-05	4.12634	12	BRMS1, FAF1, GSK3B, HDAC1, NFKBIA, NPM1, PPARD, RELA, APEX1, CDKN2A, FOXP3, HDAC3
GO:0030332	cyclin binding	0.000191739	3.85125	12	CDK1, CDK2, CDK4, CDK6, CDKN1B, CUL3, GPS2, RACK1, XRCC6, FBXW7, HDAC3, INCA1
GO:0003714	transcription corepressor activity	0.000301222	1.84368	45	ARID5A, ATF7IP, BHLHE40, CCND1, COPS2, CREBBP, CTBP1, CTBP2, DNMT3B, GPS2, HDAC1, HOMEZ, JUNB, MXD1, NAB2, PIAS1, RUNX1T1, RUVBL2, SIRT1, SNW1, TDP2, THRB, TLE1, TSG101, YY1, ZEB1, ALX1, APEX1, ATF5, CDX2, CITED2, DDIT3, EID1, FOXP3, HDAC3, HNRNPU, HR, KCNIP3, NCOR1, NR1H4, NR2F2, RARA, RBFOX2, TOB2, ZFPM2
GO:0001227	DNA-binding transcription repressor activity, RNA polymerase II-specific	0.000422196	1.76696	49	ARID5A, BCL6, BHLHE40, CEBPB, E2F1, FOXO1, FOXO3, IRF3, JDP2, MAX, MITF, MLXIPL, MXD1, MYC, NFATC2, NFKB1, NR2F6, PPARA, PPARD, PPARG, PRDM1, RB1, RELA, SKIL, SP3, SREBF2, TCF3, TFAP2A, THAP1, YY1, ZBTB16, ZEB1, ASCL1, CDX2, E2F5, ESRRA, ETS2, FERD3L, KCNIP3, NR2F1, PAX6, PROX1, SATB1, SNAI1, TSHZ3, ZBTB2, ZFPM2, ZNF148, PROP1
GO:0002039	p53 binding	0.000603536	2.66625	18	BANP, CDK5, CREBBP, EP300, GSK3B, HDAC1, HIF1A, KDM1A, MDM2, MUC1, SIRT1, SMARCB1, TP53, TP53BP1, TRIM29, EEF2, TP63, TP73
GO:0042169	SH2 domain binding	0.000728384	3.39816	12	ABL1, CRK, DAG1, IRS1, NUP62, RACK1, RUFY1, SRC, SYK, DLC1, FGFR1, KHDRBS2
GO:1990841	promoter-specific chromatin binding	0.00118255	2.9303	14	DDX5, EZH2, GTF2B, HDAC1, NUP98, PRDM1, SETDB1, STAT1, TP53, EGR1, HNRNPU, KLF4, MYOD1, PPARGC1A
GO:0031072	heat shock protein binding	0.00165835	2.11143	25	AHR, ARNTL, BAG6, CDK1, CDK5, CDKN1B, CREB1, CSNK2A1, ERN1, FAF1, HDAC6, HIF1A, MAPT, NPAS2, NR3C1, NUP62, STIP1, TSC1, CHORDC1, ST13, TSC2, USP19, DNAJB12, DNAJC9, OGDH
GO:0140097	catalytic activity, acting on DNA	0.0020737	1.83144	35	CHD3, DNMT3B, G3BP1, HMGA1, MGMT, NME1, PCNA, POLA2, POLB, RAD54B, RUVBL2, TDG, TDP2, TERF1, TERF2, XRCC6, APEX1, CHD4, DMC1, ERCC6, FAN1, FEN1, MCM4, MPG, MRE11, NBN, NEIL2, POLD2, POLI, RAD50, RECQL4, ASCC3, CHD1, DNASE1, PBRM1
GO:0005080	protein kinase C binding	0.00228698	2.75089	14	ABL1, AKT1, DACT1, DSP, HDAC5, HSPB1, IRS1, PKP2, RACK1, SRC, TDG, YWHAG, PRKCB, SDC4
GO:0016247	channel regulator activity	0.00298129	1.93948	28	ADRB2, AKAP9, BCL2, CALM1, ENSA, FLNA, GNB2, NEDD4, PDZD3, PKP2, PRKCZ, RACK1, SNF8, SNTA1, SUMO1, WNK1, FGF13, KCNIP1, KCNIP3, KCNIP4, PIAS3, PRKCB, PTPN3, YWHAE, YWHAH, KCNMB3, PRSS8, SGK2
GO:0003697	single-stranded DNA binding	0.00356042	2.0696	23	HMGB1, HNRNPK, MAPT, MLH1, NME1, PCBP1, POT1, RAD23A, SUB1, TDP2, TERF1, TERF2, TSNAX, WBP11, DMC1, HMGB2, HNRNPU, MCM4, POLR2G, POLR3C, RAD50, RECQL4, YBX1
GO:0005200	structural constituent of cytoskeleton	0.00376241	2.09722	22	ACTB, ARPC3, DSP, ERBIN, GFAP, KRT15, KRT19, KRT31, KRT5, KRT6A, KRT6B, MSN, NEFL, VIM, EPB41L3, KRT16, KRT17, SORBS3, TUBA1B, TUBB, TUBB3, TUBB4B
GO:0001098	basal transcription machinery binding	0.0049834	2.54328	14	AGO2, AHR, AR, ESR1, GTF2B, PAF1, RUVBL2, TBP, TCF4, TP53, AGO1, HNRNPU, NCOA3, PCF11
GO:0002020	protease binding	0.00524389	1.94115	25	A2M, ADAMTSL4, BAG6, BCL2, CASP3, CLTC, FN1, GSK3B, MBP, PDZD3, PRNP, PTEN, RAD23A, SELENOS, TP53, TYSND1, UBC, VCP, NFRKB, BDKRB2, LCN2, NOL3, TRIP4, ALPI, VWF
GO:0043028	cysteine-type endopeptidase regulator activity involved in apoptotic process	0.00524389	2.75089	12	BAD, BEX3, BIRC2, BIRC3, CASP3, LEF1, NKX3-1, RACK1, TNFAIP8, RPS6KA1, CASP1, NOL3
GO:0097472	cyclin-dependent protein kinase activity	0.00581789	2.86242	11	CCNB1, CCND1, CDK1, CDK2, CDK4, CDK5, CDK6, CDKL3, CDKN1B, CCNE1, CDK3
GO:0042162	telomeric DNA binding	0.00727585	2.78709	11	KDM1A, POT1, TERF1, TERF2, TP53BP1, UPF1, UPF2, XRCC6, APEX1, RAD50, ZBTB48
GO:0032182	ubiquitin-like protein binding	0.00783492	2.04854	20	BIRC2, FAF1, HDAC6, HSPB1, MDM2, NEDD4, NR3C1, NUP62, OTUB1, PML, RAD23A, SMAD3, TDG, TOM1L1, TSG101, USP16, DDI1, FBXW7, MARK4, SIRT2
GO:0035004	phosphatidylinositol 3-kinase activity	0.0090257	2.11349	18	ATM, EGFR, ERBB2, ERBB3, ESR1, FGFR4, GRB2, HBEGF, IRS1, NRG2, PDGFB, RAC1, SRC, FGFR1, IRS2, PIK3R1, PIK3R3, ICOS
GO:0140030	modification-dependent protein binding	0.0158588	1.7629	26	BAG6, BAZ2A, CARM1, CBX8, HDAC6, ING1, KMT2A, PHF1, RAD23A, TNIP2, TP53BP1, UBQLN1, UBQLN4, VCP, KAT8, FAN1, ING2, ING4, ING5, MSH6, MSL3, BRD3, CHD1, L3MBTL1, MBTD1, PWP1
GO:0004386	helicase activity	0.0167581	1.73306	27	CHD3, DDX24, DDX5, EIF4A3, G3BP1, GTF2F2, MCM2, RAD54B, RUVBL2, UPF1, XRCC6, CHD4, DDX17, DDX39A, DDX39B, ERCC6, MCM3, MCM4, MCM5, MRE11, NBN, RAD50, RECQL4, ASCC3, CHD1, DDX3Y, DHX57
GO:0052813	phosphatidylinositol bisphosphate kinase activity	0.0177701	2.08176	16	EGFR, ERBB2, ERBB3, ESR1, FGFR4, GRB2, HBEGF, IRS1, NRG2, PDGFB, RAC1, SRC, FGFR1, IRS2, PIK3R1, ICOS
GO:0003727	single-stranded RNA binding	0.018996	1.96939	18	AGO2, ATXN1, CBX8, EIF4A3, EIF4H, HMGB1, PABPC1, PATL1, PTBP1, RBPMS, SYNCRIP, AGO1, HNRNPU, ILF3, KHDRBS2, POLR2G, PPIE, TLR8
GO:0044325	ion channel binding	0.0190238	1.80038	23	ACTN1, AKAP9, CALM1, CTNNB1, FLNA, GOPC, PKP2, PRNP, RYR2, SNTA1, SRC, YES1, YWHAQ, YWHAZ, CIB1, FGF13, HERPUD1, KCNIP3, PPP1R9A, YWHAE, YWHAH, CDH5, TSPO
GO:0042393	histone binding	0.0237311	1.60469	32	BAZ2A, CARM1, CBX8, ING1, KAT5, KMT2A, LEF1, MCM2, NAP1L2, NPM1, PHF1, PRMT6, PTMA, SIRT1, STAT1, TP53BP1, KAT8, USP16, DEK, ING2, ING4, ING5, KMT2C, MSH6, MSL3, PRKCB, SET, BRD3, CHD1, L3MBTL1, MBTD1, PWP1
GO:0004713	protein tyrosine kinase activity	0.0255576	1.62272	30	ABL1, CLK1, EGFR, ERBB2, ERBB3, FGFR4, HBEGF, JAK1, NRG2, PRKCD, SRC, STAT5A, STK16, SYK, YES1, DYRK4, FER, DYRK2, EFNB2, EPHB3, EPHB6, FGFR1, MAP2K1, MAP2K4, MAP2K5, ROR2, STAT5B, TTK, DDR2, TXK
GO:0048156	tau protein binding	0.0257007	2.35354	11	ACTB, APOE, CDK5, DCTN1, EP300, GSK3B, HDAC6, PIN1, PRKAA1, SMAD2, MARK4
GO:0017025	TBP-class protein binding	0.0257007	3.06349	7	AHR, ESR1, GTF2A1, GTF2B, RUVBL2, THRA, TAF1B
GO:0005496	steroid binding	0.0279009	1.88376	18	APOE, AR, ESR1, ESR2, ESRRG, NR1H3, NR3C1, PGR, ESRRA, GRAMD1A, NR1H4, NR3C2, RORA, SHBG, TSPO2, VDR, TSPO, UGT1A1
GO:0043021	ribonucleoprotein complex binding	0.0313038	1.71664	23	BAG6, CSNK2B, DDX5, EIF4A3, EIF4H, EIF5A2, EZH2, MDM2, NME1, NPM1, PPP1CA, RACK1, SNRPA, EEF2, HNRNPU, LETMD1, MTOR, PPIH, ZC3H12A, LTN1, MTIF2, MTIF3, PYM1
GO:0019213	deacetylase activity	0.0346841	2.08609	13	ATXN3, BRMS1, CHD3, HDAC1, HDAC5, HDAC6, KDM1A, SIRT1, ARID4B, CHD4, HDAC3, SIRT2, CES2
GO:0030145	manganese ion binding	0.0393623	2.0519	13	ABL1, ATP13A2, DCP2, GLUL, MTPAP, PRKACA, TDP2, DYRK2, FAM20C, FEN1, MRE11, PCK2, PPM1B
GO:0043621	protein self-association	0.0422923	2.10068	12	ATXN1, CCL5, CRK, NKX3-1, PPARG, RYR2, SGTA, SHANK3, TDG, TP53, KCTD9, CCDC88C
GO:0003725	double-stranded RNA binding	0.0457698	1.90029	15	ACTN1, AGO2, CLTC, EIF4H, HMGB1, MSN, VIM, AGO1, HNRNPU, ILF2, ILF3, TUBA1B, TARBP2, TLR8, TUBB4B
GO:0000287	magnesium ion binding	0.0463707	1.50582	33	ABL1, ARF1, CDK2, DCTPP1, ERN1, GEM, GLUL, MAP3K8, MAST1, MTPAP, NEK6, NME1, OXSR1, PLK1, PRKACA, PRTFDC1, RAN, RHEB, RPS6KA5, SRPK2, TDG, TDP2, WNK1, RPS6KA1, DYRK2, FAN1, FEN1, MAP3K5, MAST2, MSH6, SPHK1, ALPI, PPM1B
GO:0032947	protein-containing complex scaffold activity	0.0492292	1.79866	17	AKAP9, GRIP1, ITSN1, LAMTOR3, MAPK8IP2, NUP62, PKP2, RACK1, SGTA, SHANK3, SLC9A3R2, DEDD2, MAGI1, MAGI2, MAGI3, NCK2, SAV1

## Sheet: Data File S7
Data File S7. List of all the OMIM diseases significantly associated with the HLHS interactome
OMIM ID	OMIM disease	P-value	Enrichment ratio	Number of genes in the HLHS interactome	Genes in the HLHS interactome
114480	BREAST CANCER	4.10669e-08	17.516	9	AKT1, ATM, BARD1, BRCA1, CASP8, CDH1, ESR1, TP53, TSG101
125853	DIABETES MELLITUS, NONINSULIN-DEPENDENT	1.44134e-07	14.496	9	HMGA1, HNF1A, IRS1, PPARG, TCF7L2, HNF4A, IRS2, NEUROD1, PPP1R3A
607174	MENINGIOMA, FAMILIAL, SUSCEPTIBILITY TO	4.34996e-07	38.9244	5	NF2, PDGFB, PTEN, SMARCE1, MN1
211980	LUNG CANCERALVEOLAR CELL CARCINOMA, INCLUDED	4.34996e-07	19.2332	7	CASP8, EGFR, ERBB2, MAP3K8, RASSF1, ERCC6, IRF1
114500	COLORECTAL CANCER	2.79277e-06	20.0183	6	AKT1, CTNNB1, EP300, SRC, TP53, DLC1
104300	ALZHEIMER DISEASE	1.83871e-05	21.2315	5	A2M, APP, NOS3, PAXIP1, PLAU
167000	OVARIAN CANCEROVARIAN CANCER, EPITHELIAL, INCLUDED	2.68251e-05	31.1395	4	AKT1, CDH1, CTNNB1, OPCML
181500	SCHIZOPHRENIA	5.67981e-05	16.6819	5	AKT1, DISC1, DAO, DTNBP1, CHI3L1
168600	PARKINSON DISEASE, LATE-ONSET	9.42117e-05	23.3547	4	ATXN2, MAPT, TBP, NR4A2
608089	ENDOMETRIAL CANCER	0.000606442	28.0256	3	CDH1, PTEN, MSH6
609423	HUMAN IMMUNODEFICIENCY VIRUS TYPE 1, SUSCEPTIBILITY TO	0.00133986	12.4558	4	CCL2, CCL3, CCL3L1, CXCL12
613065	LEUKEMIA, ACUTE LYMPHOBLASTIC	0.00171447	20.0183	3	GNB1, TAL1, NBN
187500	TETRALOGY OF FALLOT	0.00231493	17.516	3	GATA4, GATA6, ZFPM2
613659	GASTRIC CANCERGASTRIC CANCER, INTESTINAL, INCLUDED	0.00231493	17.516	3	CASP10, ERBB2, IRF1
114550	HEPATOCELLULAR CARCINOMA	0.00319086	15.5698	3	CASP8, CTNNB1, TP53
601626	LEUKEMIA, ACUTE MYELOID	0.00440215	8.4926	4	GATA2, NPM1, RUNX1, CEBPA
176807	PROSTATE CANCER	0.00900873	10.7791	3	AR, CDH1, PTEN
601665	OBESITYLEANNESS, INCLUDED	0.0131231	9.34186	3	ADRB2, PPARG, POMC
605027	LYMPHOMA, NON-HODGKIN, FAMILIAL	0.0201974	15.5698	2	CASP10, RAD54B
166710	OSTEOPOROSIS	0.0201974	15.5698	2	PDLIM4, VDR
222100	DIABETES MELLITUS, INSULIN-DEPENDENT	0.0201974	15.5698	2	HNF1A, FOXP3

## Sheet: Data File S8
Data File S8. List of all the DisGeNET diseases significantly associated with the HLHS interactome
DisGeNET ID	DisGeNET disease	P-value	Enrichment ratio	Number of genes in the HLHS interactome	Genes in the HLHS interactome
C1458155	Mammary Neoplasms	0	2.52851	114	ABL1, ADAM10, AHR, AKT1, AR, ARAF, ARHGDIA, ATM, AURKA, BARD1, BCL2, BIRC2, BMPR2, BRCA1, CASP7, CASP8, CCND1, CDH1, CDKN1B, CHEK1, CTNNB1, DLL1, DNMT3B, DSC3, E2F1, EGFR, EP300, ERBB2, ERBB3, ESR1, ESR2, EZH2, FHL2, FLNA, FN1, FOS, GRB7, HIF1A, HNRNPK, ITSN2, JUN, KRT18, KRT5, LMNA, MDM2, NCOA1, NCOA2, NFKBIA, NOS3, NOTCH1, NOTCH3, NOTCH4, NR2F6, PABPC1, PAEP, PDPK1, PDZK1, PGR, PIN1, PTEN, RB1,…
C0001418	Adenocarcinoma	4.07896e-12	3.74801	43	ABL1, APOE, BCL2, CASP8, CCND1, CTNNB1, EGFR, ERBB2, ESR1, ESR2, GRB7, KMT2A, MYC, NFKB1, NOS3, NR1I2, PCNA, PGR, PLAU, PPARG, PTEN, RASSF1, RUNX3, SELENBP1, SPP1, STAT3, STAT5A, TCF7L2, TP53, ARID1A, CDKN2A, CXCL8, EEF2, HOXA10, KMT2C, MPP1, MTOR, NCOA3, RARB, SMARCC1, TP63, CKB, HRH4
C2239176	Liver carcinoma	6.52634e-12	2.72849	67	A2M, ACTB, AR, ATM, BCL2L1, CASP8, CCND1, CDK4, CDKN1B, CEBPB, COPS5, CTNNB1, E2F1, EGFR, ESR1, ETFA, FOS, GAPDH, GLUL, GNMT, HSPB1, IRF2, IRF5, IRS1, ITIH3, JDP2, JUN, KMT2A, KMT2B, MLXIPL, MYC, NFKBIA, NME1, PDGFB, PPARG, PRDX2, PTEN, RAC1, RB1, SFN, SKP2, SPIB, SREBF2, STAT1, TP53, TSC1, CCR1, APEX1, ARID1A, CCL3, CCNE1, CDKN2A, CEBPA, CEBPD, CXCL8, HMGB2, IRS2, KMT2C, MTOR, NR1H2, NR1H4, RARA…
C0038356	Stomach Neoplasms	4.48686e-11	2.45955	75	ADRB2, AHR, AKT1, ATM, BCL2L1, BIRC2, CASP10, CASP8, CCND1, CDH1, CDK4, CDKN1B, CTNNB1, DNMT3B, EEF1A1, EGFR, EP300, ERBB2, HBEGF, HSPB1, ING1, JUN, KMT2A, MAPK1, MAPK3, MLH1, MUC1, MYC, NOS3, NPM1, PLAU, PPARG, PRKAA1, PRNP, RAD23A, RGS2, RHOA, RUNX3, SELENBP1, SMAD4, SRC, SREBF2, STAT3, TP53, APEX1, ARID1A, CDKN2A, CDKN2D, CXCL8, DLC1, FSD1, IRF1, IRS2, KMT2C, MAPK8, MSH6, PAX6, PLAGL1, PRKCB, …
C0007137	Squamous cell carcinoma	3.68493e-10	3.395	41	AKT1, ATM, CCND1, CDH1, CREBBP, CSNK2A1, CSNK2B, EGFR, EP300, GAPDH, GJB2, HDAC1, HSPB1, ING1, KLF5, KRT1, KRT6B, MAPK1, MAPK3, MYC, PRTFDC1, PTEN, RACK1, SFN, STAT3, TNFRSF10B, TP53, TSC1, CCL2, CDKN2A, CEBPA, CTTN, CXCL8, FGFR1, NCOA3, PRKDC, RARB, RECQL4, TP63, TSC2, UMPS
C0027626	Neoplasm Invasiveness	4.35963e-08	2.91844	42	ACTB, AHR, CCL5, CDH1, CTNNB1, EGFR, EPS8, FN1, HIF1A, KDM1A, KRT19, MAPK1, MAPK3, NME1, PLAU, PRDX2, PTEN, RECK, RELA, RHOA, SP1, SRC, SUMO1, TXN, UBQLN1, ZBTB16, ZEB1, CCL2, CDKN2A, CFL1, DEK, EEF2, EPO, PAX6, PDCD4, SET, SHBG, SNAI1, TWIST1, CHI3L1, CXCL12, KRT7
C0033578	Prostatic Neoplasms	7.34496e-08	1.91865	95	ADRB2, AHR, AKT1, APPL2, AR, ATM, ATR, AURKA, BAD, BAZ2A, BCL2, BRCA1, CCND1, CCND2, CDH1, CDKN1B, CREBBP, CTBP2, CTNNB1, CYP2C18, DAG1, DNMT3B, EGFR, ERBB2, ERBB3, ERG, ESR1, ESR2, ETV1, EZH2, EZR, FGFR4, GNMT, GRB7, GSK3B, HDAC6, HIF1A, IRS1, JUP, MAPK3, MDM2, MLH1, MYC, NAGK, NCOA1, NCOA2, NKX3-1, NOS3, NR3C1, PDZK1, PLAU, PPARA, PRDX2, PRKCZ, PRNP, PTEN, RUNX1, RXRA, SELENOS, SIRT1, SRD5A2, S…
C0007621	Neoplastic Cell Transformation	1.05615e-07	3.11059	36	BCL2, BRCA1, CCND1, CDH1, ESR1, FN1, HMGN1, IL7R, IRS1, JUN, KRT15, KRT19, KRT5, MDM2, MITF, MUC1, MYC, NFKB1, NOTCH1, PHLPP1, RAC1, RELA, SP1, STAT3, TP53, TSC22D1, VIM, ZEB1, WNT5A, CTNND2, CXCL8, EPAS1, MAPK8, MIR15B, SNAI1, TP63
C0021655	Insulin Resistance	1.84987e-07	3.72622	27	ADRB2, AHR, AR, EGFR, FOS, HMGA1, IRS1, LMNA, NOS3, NR4A1, PPARA, PPARG, PRKAA1, PRKAA2, PTEN, SIRT1, SREBF2, ADIPOQ, CASP1, CTF1, IRS2, NR4A3, PIK3R1, PPP1R3A, SELENOP, SREBF1, IGFBP2
C0010606	Adenoid Cystic Carcinoma	4.5791e-07	3.17971	32	ATM, BRCA1, CCND1, CDH1, CREBBP, EP300, ERBIN, FGFR4, FOXO3, KANSL1, KRT15, KRT5, MORF4L1, MYB, NOTCH1, PDZK1, PTEN, SMARCE1, SOX4, TP53, AQP1, ARID1A, ARID4B, EFHD1, FBXW7, GUCY1A1, KMT2C, MAGI1, MAGI2, PRKDC, RBFOX2, IGFBP2
C0024121	Lung Neoplasms	2.17381e-06	2.33253	50	A2M, ACTB, AKT1, APOE, BCL2L1, CASP8, CCND1, CDKN1B, CTNNB1, EGFR, ERBB2, ERBB3, ESR1, FOS, GRB7, JUN, JUNB, LMNA, MAP3K8, MAPK1, MAPK14, MAPK3, MYC, NOTCH3, PCNA, PTEN, PTMA, RASSF1, RB1, RUNX3, SELENBP1, SPP1, SPRY2, STAT5A, TP53, WNT5A, BECN1, CDKN2A, EEF2, ERCC6, FGFR1, GATA6, IRF1, MCL1, MPP1, NOTCH2, RARB, SELENOP, SMARCC1, TP63
C0030297	Pancreatic Neoplasm	4.77667e-06	3.16164	28	AHR, ATM, BCL2L1, BRCA1, CDH1, CTNNB1, HIF1A, KLF5, LY6E, MDM2, MYC, NFKBIA, NR5A2, PLAU, PPARG, PTEN, RB1, SMAD4, STAT3, TNFRSF10B, TP53, CDKN2A, CXCL8, FGF13, SPINK1, TP63, TSC2, TFPI2
C0919267	ovarian neoplasm	1.03447e-05	2.92253	30	AKT1, BRCA1, CCND2, CDH1, CDKN1B, CTNNB1, EGFR, ERBB2, HDAC6, LMNA, MAPK1, MAPK3, MLH1, MYC, NR5A1, PPP1CC, PRTFDC1, PTEN, SELENBP1, SKP2, STAT3, ZEB1, CCNE1, CXCL8, DLC1, MTOR, TP63, MECOM, OPCML, TUBB3
C0157733	hair abnormalities (non-specific)	1.5362e-05	4.80803	15	ATM, CDK4, DSG1, DSP, KRT1, MGMT, MITF, NOTCH3, POT1, SRD5A2, STAT3, CDKN2A, CDKN2B, CDKN2D, ERCC6
C2677869	Hair shaft abnormalities	1.5362e-05	4.80803	15	ATM, CDK4, DSG1, DSP, KRT1, MGMT, MITF, NOTCH3, POT1, SRD5A2, STAT3, CDKN2A, CDKN2B, CDKN2D, ERCC6
C0035126	Reperfusion Injury	2.82954e-05	3.03943	26	BCL2, CASP3, CASP8, FOS, HBEGF, HSPB1, JUN, MAPK9, NOS3, PLAT, PLAU, PPARA, PPARG, PTEN, RELA, STAT3, VIM, CCL2, CCL3, CXCL8, EFNB2, EGR1, ETS1, MAPK8, CHAT, THBS1
C0024668	Mammary Neoplasms, Experimental	2.82954e-05	2.43607	38	ACTB, AURKA, BRCA1, CCND1, CDC42, CDH1, CDK4, CDK6, EEF1A1, EGFR, ERBB2, ESR1, ESR2, EZR, FN1, HBA1, HNRNPAB, KRT5, NCOA1, PGR, PPARA, PRDX2, PTBP1, PTN, RAN, RB1, SPP1, STAT3, STAT5A, TSC22D1, UBE2I, YWHAZ, AQP1, PIK3R1, PLK2, SELENOP, SOX9, GNAI2
C0017636	Glioblastoma	5.2382e-05	3.09712	24	BHLHE40, CDK6, EGFR, ERBB2, FN1, HIF1A, MGMT, MLH1, MYC, NOTCH1, NOTCH3, PML, RECK, RUNX1, RUNX3, CTNND2, CXCL8, FAN1, FOSL2, MDM4, MSH6, NCOR1, NOTCH2, CHI3L1
C0007873	Uterine Cervical Neoplasm	5.76077e-05	4.9683	13	CASP8, CCND1, CTNNB1, EGFR, MYC, NOTCH1, STAT3, YY1, WNT5A, MTOR, NOTCH2, PIAS3, RARB
C0011581	Depressive disorder	7.71369e-05	1.78041	74	A2M, AKT1, ALG8, APP, AR, ARNTL, ATF4, ATXN2, ATXN3, BCL2, BRCA1, CALM2, CLOCK, CREB1, DCTN1, DISC1, DLG4, ESR1, FOS, GFAP, GLUL, GNB1, GSK3B, GTF2IRD1, HDAC5, HDAC6, MAPK3, MAPT, MLH1, NOS3, NOTCH3, NPAS2, NR3C1, PDGFB, PDYN, PRKACA, PRKCI, PRNP, PSEN1, RAC1, SAT1, STAT3, STIP1, TBP, TLE1, VCP, BICC1, AGO1, CDKN2A, CXCL8, DAO, DTNBP1, FAN1, FGFR1, GABPA, MAP2K5, MAPK8, MSH6, NR3C2, NR4A2, POMC, …
C0079772	T-Cell Lymphoma	8.71534e-05	6.87918	9	AKT1, BCL6, EP300, PPARG, RHOA, STAT3, TP53, ARID1A, STAT5B
C0036920	Sezary Syndrome	8.71534e-05	4.78429	13	CDKN1B, CHD3, CREBBP, MAPK1, PTEN, RB1, TP53, ZEB1, RPS6KA1, ARID1A, CCR4, CDKN2A, KMT2C
C0027627	Neoplasm Metastasis	0.000106268	2.21413	41	AHR, ARHGDIA, CDH1, EGFR, ERBB2, ESR1, EZR, MAPK1, MAPK3, MAPK9, MLH1, MYC, NAGK, NCOA1, NME1, PLAU, PRNP, PTEN, RAC1, RB1, RECK, SP1, SPP1, STAT3, TNFAIP8, TP53, VIM, CFL1, EEF2, EPO, ETV4, FGF13, LCN2, PROX1, SNAI1, TP63, TWIST1, VIP, YWHAE, CXCL12, TFPI2
C1961102	Precursor Cell Lymphoblastic Leukemia Lymphoma	0.000106268	3.75383	17	ABL1, ARNT, CASP8, CDK6, CYP2C8, ERG, IKZF3, KMT2A, RB1, RUNX1, TCF3, TP53, CDKN2A, DUX4, HOXD4, PAX5, NQO1
C0042514	Tachycardia, Ventricular	0.000126877	4.9683	12	CALM1, CALM2, CALM3, DSG2, DSP, JUP, LMNA, NOS3, RYR2, CTNNA3, EPO, KCNJ2
C0024667	Animal Mammary Neoplasms	0.00018103	2.36255	34	ACTB, BRCA1, CCND1, CDC42, CDH1, CDK4, EEF1A1, EGFR, ERBB2, ESR1, ESR2, EZR, FN1, HBA1, KRT5, PGR, PPARA, PRDX2, PTBP1, PTN, RAN, RASSF1, RB1, STAT3, STAT5A, TSC22D1, UBE2I, YWHAZ, AQP1, PIK3R1, PLK2, SELENOP, SOX9, GNAI2
C0021361	Female infertility	0.000198258	4.45434	13	AR, ARNTL, CEBPB, ESR1, ESR2, MAPK1, MAPK3, NR1I2, NR5A2, PGR, TP53, CEBPA, NR2F2
C0027746	Nerve Degeneration	0.000232183	2.48415	30	APOE, APP, ATP13A2, ATXN2, ATXN3, BCL2, CASP3, CDH1, CTNNB1, DCTN1, MAPK1, MAPK3, PCNA, PLAT, PPARG, PSEN1, PTPN5, SIRT1, VCP, DAO, EPO, ETS2, NBN, OTX2, PPARGC1A, SELENOP, TSC2, UBQLN2, FUS, PRPH
C0014170	Endometrial Neoplasms	0.000247018	3.37469	18	CDH1, CYP11A1, EP300, ESR1, ESR2, EZH2, MYC, PGR, PTEN, SRD5A2, ZEB1, ARID1A, CCL2, CHD4, CXCL8, FBXW7, HOXA10, MSH6
C0023418	leukemia	0.000247018	3.37469	18	AR, ATM, BAD, BIRC2, BIRC3, CCND1, ERG, ESR1, KMT2A, MGMT, MLH1, PLK1, PRKCZ, PTEN, RB1, MSH6, NCOA3, SPHK1
C0009375	Colonic Neoplasms	0.000371939	2.30921	33	A2M, BCL2, CCND1, CCND2, CTNNB1, EGFR, ERBB2, HSPB1, JUN, KDM1A, LEF1, MCM2, MDM2, MLH1, MYC, NFKB1, NOTCH1, PCNA, POLB, PPARG, RECK, RELA, SERTAD1, SRC, STAT3, TCF7L2, TP53, ACTA2, BECN1, GUCY1A1, PRR5-ARHGAP8, UMPS, MECOM
C0022596	Palmoplantar Keratosis	0.000399677	3.14659	19	AKT1, DSC2, DSG1, DSP, GJB2, JUP, KANK2, KRT1, KRT5, KRT6A, KRT6B, PTEN, SAT1, SERPINB7, KRT16, KRT17, MAP2K1, RECQL4, TP63
C0027960	Nevus	0.00044697	5.22979	10	AKT1, CDK4, MGMT, MITF, POT1, PTEN, TRIM37, CDKN2A, CDKN2B, CDKN2D
C0020534	Orbital separation excessive	0.000487642	1.93885	48	ACTB, AKT1, ANKRD11, CCND2, CTBP1, DNMT3B, EZH2, FLNA, FLNB, GRIP1, HBA1, KMT2A, LMNA, MAF, NOTCH3, PTEN, RB1, RUNX2, SMAD3, SMAD4, STAMBP, STAT3, TFAP2A, TGFBR1, THRA, TRIM37, WNT5A, ALX1, AUTS2, CTNND2, FGFR1, MAP2K1, MEF2C, MID1, MYOD1, NOTCH2, PDHX, RECQL4, ROR2, SOX9, TWIST1, UMPS, YWHAE, ZIC1, DDR2, HSD17B4, KCNJ2, PIGN
C0037286	Skin Neoplasms	0.000563369	2.96615	20	AKT1, CASP10, CASP8, CSNK2A1, CSNK2B, GJB2, HIF1A, KRT1, LMNA, MDM2, NOTCH3, PDGFB, POT1, PPARD, RELA, SP1, TGFBR1, TP53, CEBPA, KRT17
C0010417	Cryptorchidism	0.000563369	1.8963	50	ACTB, ANKRD11, AR, ATR, BCL2L1, CASP3, CDC6, CREBBP, CUL4B, CYP11A1, EBP, EP300, EZH2, FLNA, FLNB, GRIP1, HBA1, HNRNPK, NOTCH3, NR5A1, SMAD4, SMARCB1, SMARCE1, SRD5A2, TCF4, TFAP2A, ZBTB16, WNT5A, ACTA2, ARID1A, CITED2, ERCC6, FGFR1, GATA4, GATA6, MAP2K1, MAPRE2, MID1, MYOD1, NOTCH2, OTX2, PAX6, RECQL4, ROR2, SOX9, SRY, TP63, ZFPM2, PIGN, POLR3B
C0206669	Hepatocellular Adenoma	0.000633234	8.51708	6	A2M, CDKN1B, CTNNB1, HNF1A, PTEN, NR1I3
C2063326	Cardiomyopathy, right ventricular	0.000633234	8.51708	6	DSC2, DSG2, DSP, JUP, PKP2, RYR2
C0024299	Lymphoma	0.000678825	3.38267	16	BCL2, BCL6, CASP10, MDM2, MLH1, NOTCH1, PTEN, RAD54B, RB1, RUNX1, TP53, CDKN2A, CDKN2B, MSH6, NBN, ICOS
C0023893	Liver Cirrhosis, Experimental	0.000681429	1.47689	114	A2M, ACTN1, AP3S1, APBB1IP, APP, AQP7, BIRC3, CASP7, CCL5, CDK1, CXADR, ECT2, EZR, FHL2, FLNA, FOS, FOXA2, GBP2, IL7R, JDP2, KRT18, KRT19, LMO2, MAP3K8, MGMT, MSN, MVP, MYC, MYL9, NAGK, NEK6, NFKBIA, NOS3, NPAS2, PLAT, PLAU, PLG, PLSCR2, PPP1R18, PRKCD, PRNP, PRTFDC1, PSMB9, PTN, RCN2, RECK, RELA, RGS2, SIRT1, SMAD2, SMAD4, SOX4, ST14, SULT2A1, TCF4, THYN1, TNFAIP8, TSC22D1, VIM, YWHAG, YWHAZ, CY…
C0005586	Bipolar Disorder	0.000694235	1.59833	83	ACTB, ADRB2, AKT1, APOE, APP, ARNTL, ATF4, BCL2, BHLHE40, CACNA1A, CALM2, CASP8, CLOCK, CREB1, CREBBP, DISC1, DLG4, ERBB3, ESR1, FOXO3, GAD2, GFAP, GSK3B, HIF1A, ITIH3, MAPK1, MAPT, NEDD4, NEFL, NOS3, NOTCH4, NPAS2, NR3C1, PDYN, PPARD, PRKCI, PRKCZ, RACK1, RNF41, SAT1, SIRT1, TCF4, TCF7L2, TSNAX, YWHAZ, KCNQ3, ATF5, BDKRB2, CALCA, CCL2, CTNND2, CXCL8, DAO, DOK5, DTNBP1, FGFR1, FOXP3, GABRB1, HMGX…
C0020456	Hyperglycemia	0.000733413	3.91442	13	HMGA1, HNF1A, LMNA, NOS3, PPARG, SP1, GATA6, IRS2, PIK3R1, PLAGL1, PPP1R3A, PRKCB, NQO1
C0007786	Brain Ischemia	0.000740568	2.59216	24	APP, CASP3, CEBPB, CYCS, GTF2IRD1, HIF1A, JUN, MAPK1, MAPK3, NFKB1, NFKBIA, NOTCH3, PLAT, PLAU, RB1, RELA, STAT3, TP53, CCL2, CCL3, CCL4, CCR4, EGR1, MAP2K1
C0004114	Astrocytoma	0.000858266	4.11169	12	AR, ESR1, ESR2, HIF1A, NOTCH1, TSC1, CDKN2A, FGFR1, LATS2, NCOA3, NOTCH2, TSC2
C0151744	Myocardial Ischemia	0.00102763	2.09191	36	ACTB, ADRB2, ARNTL, BHLHE40, CCND1, CCND2, CRK, ENSA, F2RL1, GBP2, HMGB1, JUNB, MAP3K8, MAPK14, MSN, NEDD4, NFKBIA, NOS3, NR4A1, RTN1, RYR2, STAT5A, ZEB1, ADIPOQ, CCL2, CCL3, CCL4, CEBPD, IRF1, KLF4, MEOX2, POMC, HADHA, MX1, PPM1B, SLC6A6
C0025500	Mesothelioma	0.00107132	3.56698	14	CDH1, CDKN1B, EGFR, ESR1, MUC1, NF2, PGR, RASSF1, SPP1, SYK, CDKN2A, EGR1, EID1, MTOR
C0005695	Bladder Neoplasm	0.00132115	2.3534	27	ATM, BIRC3, CDH1, CREBBP, EGFR, EP300, ESR1, ESR2, KMT2A, MYC, PABPC1, POLB, RASSF1, RB1, RHOA, SRC, TP53, ARID1A, CCNE1, CDKN2A, CXCL8, KMT2C, KRT16, NCOR1, GSTZ1, NQO1, NRSN1
C0023467	Leukemia, Myelocytic, Acute	0.00169565	2.28053	28	ARHGEF12, BCL2, CASP7, CCND2, CDK6, EIF4EBP1, ERG, FHL2, FOXO1, GATA2, HSPB1, KMT2A, MYC, NPM1, NUP98, RGS2, RUNX1, RUNX1T1, RUNX3, STAT3, SVIL, CEBPA, CEBPD, CTNNA1, KMT2C, MN1, TSC2, MX1
C0279626	Squamous cell carcinoma of esophagus	0.00211996	2.60836	21	CCND1, CREBBP, EGFR, EP300, HIF1A, HMGB1, KRT13, KRT19, MGMT, NOTCH1, NOTCH3, RB1, SFN, TNFAIP8, TP53, CDKN2A, CFL1, FBXW7, KMT2C, KRT17, NOTCH2
C0025149	Medulloblastoma	0.00225035	3.05741	16	CDK6, CTNNB1, ERBB2, ESR2, MLH1, MYC, RASSF1, SKP2, SMARCB1, STAT3, CCNE1, IRS2, MSH6, NBN, OTX2, BRD3
C0006118	Brain Neoplasms	0.00243276	4.32026	10	CCND1, CDK4, DLL1, DTX2, MGMT, PCNA, RELA, SIRT1, SPP1, CDKN2A
C1835047	MELANOMA, CUTANEOUS MALIGNANT, 1	0.00243276	5.29952	8	CDK4, MGMT, MITF, POT1, PTEN, CDKN2A, CDKN2B, CDKN2D
C0026640	Mouth Neoplasms	0.00276096	2.99973	16	GAPDH, HSPB1, KRT6B, LMNA, MGMT, MYC, PRTFDC1, RACK1, SFN, TP53, TSC1, CCL2, CDKN2A, HOXD10, TSC2, UMPS
C0007138	Carcinoma, Transitional Cell	0.00326719	3.61331	12	CCND1, CREBBP, EP300, ESR2, KMT2A, PABPC1, PLAU, TP53, ARID1A, KMT2C, NCOR1, VDR
C0038220	Status Epilepticus	0.00331196	2.51408	21	CASP3, CASP8, FOS, HSPB1, JUN, JUNB, SNTA1, SRC, SLC12A5, BECN1, CASP1, CCL2, CCL3, CCR9, CD40, EPO, JUND, MEF2C, SCN1A, SLC6A1, SSTR5
C1512419	Hereditary Melanoma	0.00331196	5.79635	7	CDK4, MGMT, MITF, POT1, CDKN2A, CDKN2B, CDKN2D
C0040997	Trigeminal Neuralgia	0.00331196	5.79635	7	FOS, GFAP, MAPK1, MAPK3, MAPK9, CALCA, MAPK8
C1866753	Impaired horizontal smooth pursuit	0.00353764	8.2805	5	ATXN1, ATXN2, ATXN3, EEF2, POLR3B
C0152013	Adenocarcinoma of lung (disorder)	0.00353764	2.81537	17	AHR, CREBBP, EGFR, EP300, FOXO3, HSPB1, JUNB, KLF5, LMNA, MYC, SFN, TP53, HMGB2, MAP2K1, MSH6, TP63, DDR2
C0524620	Metabolic Syndrome X	0.0037482	4.47147	9	HMGA1, NOS3, NR1I2, SIRT1, ADIPOQ, CCL2, NR1I3, SHBG, LBP
C1961099	Precursor T-Cell Lymphoblastic Leukemia-Lymphoma	0.0037482	4.9683	8	IL7R, LMO2, MYB, NOTCH1, RPL5, TAL1, FBXW7, MTOR
C0029463	Osteosarcoma	0.0037482	3.16164	14	EGFR, EZH2, JUN, LMNA, MDM2, MYC, NR1I2, PRDX2, RB1, RUNX2, TP53, ESRRA, RECQL4, RGS1
C0014175	Endometriosis	0.0037586	2.03828	32	ARNT, C1R, COPS2, DDX5, EGFR, ESR2, FOS, HBEGF, HDAC1, IL7R, MED4, MYLIP, NCOA1, NCOA6, NR2F6, NR3C1, NR4A1, NR5A1, PGR, RORB, SRD5A2, THRA, ACTA2, DKK1, KLF13, NCOR1, NR2F2, NR3C2, RARB, SELENOP, PLXNC1, SLC16A6
C1403035	Subcutaneous lipomas	0.00377324	6.6244	6	AKT1, CDKN1B, CDKN2C, PTEN, CDKN2B, FGFR1
C0020538	Hypertensive disease	0.00390679	1.71094	52	AHR, APOE, AR, BCL2, BMPR2, CUL3, EGFR, FN1, FOS, GSK3B, HIF1A, JUN, LMNA, MUC1, NME1, NOS3, NR3C1, OXSR1, PLAT, PLG, PPARA, PPARG, PRKACA, PRKCD, PTEN, RELA, RGS2, RPS6KB1, SLC9A3R2, SMAD3, SMAD4, TGFBR1, TP53, TRPC5, WNK1, ACTA2, ADIPOQ, AQP1, BDKRB2, CALCA, CCL2, CYP11B2, EPO, ERCC6, GUCY1A1, MTOR, NR3C2, POMC, PPP1R3A, THPO, VDR, VWF
C0008925	Cleft Palate	0.00396275	1.89744	38	ACTB, ATR, CTBP1, EIF4A3, FLNA, FLNB, GRIP1, MYC, NOS3, RAP1B, RARG, RB1, RBM10, RPL5, RUNX2, SPRY2, STAMBP, STAT3, SUMO1, TFAP2A, KIAA0586, ALX1, CHUK, FGFR1, MAPRE2, MEOX1, MID1, MYOD1, NBN, OTX2, POLR1C, RECQL4, SOX9, TP63, TWIST1, KCNJ2, PIGN, RPS24
C0015672	Fatigue	0.00396275	1.91486	37	ABL1, ATM, ATXN2, BCL2, BCL6, BIRC3, CCND1, DCTN1, HBA1, HNF1A, LMNA, MLH1, NR3C1, PRKACA, RPL5, RUNX1, SLC3A1, TCF3, VCP, CCR1, CD79A, DAO, EPO, FAN1, HNF4A, MSH6, NFKB2, OTX2, PAX8, PIK3R1, PPARGC1A, PTPN3, UBQLN2, FUS, PROP1, PRPH, RPS24
C0011860	Diabetes Mellitus, Non-Insulin-Dependent	0.00396275	2.02529	32	ATP2A3, BCL2, BCL2L1, CASP3, CASP8, CCND2, EGFR, GCKR, HBA1, HMGA1, HNF1A, IRS1, LMNA, NFKB1, NOS3, PPARA, PPARG, RELA, SIRT1, TCF7L2, ADIPOQ, HNF4A, IRS2, NEUROD1, NOTCH2, PAX6, PPARGC1A, PPP1R3A, PRKCB, PROX1, SHBG, SMAD5
C0206698	Cholangiocarcinoma	0.00430267	3.97464	10	EGFR, ERBB2, PRKACA, PTEN, SMAD4, TP53, ARID1A, KMT2C, PTPN3, PBRM1
C0376634	Craniofacial Abnormalities	0.00431022	2.03996	31	ACTB, CSNK1A1, CTNNB1, DNMT3B, EGFR, EP300, GATA2, GTF2IRD1, KANSL1, LMNA, NOTCH1, PTEN, RUNX2, SMAD2, SMAD3, SMAD4, SPRY2, TCF4, TFAP2A, THRB, TRIM37, KIAA0586, ALX1, ERCC6, ETS2, FGFR1, HOXA1, HOXB1, PAX6, SOX9, TP63
C0544886	Somatic mutation	0.00462728	2.72455	17	AKT1, CASP10, CASP8, CREB1, CTNNB1, ERBB2, NF2, RB1, SMAD4, SSX2, TP53, DDIT3, IRF1, NR4A3, PAX6, RARA, THPO
C0011570	Mental Depression	0.00473166	1.75801	46	A2M, AKT1, APP, AR, ARNTL, ATF4, ATXN3, BRCA1, CALM2, CLOCK, CREB1, DISC1, DLG4, ERBB3, ESR1, FOS, GFAP, GLUL, GSK3B, HDAC5, HDAC6, HIF1A, MAPK3, NOS3, NPAS2, NR3C1, PDYN, PRKCI, PSEN1, RAC1, TLE1, BICC1, AGO1, CDKN2A, CXCL8, DTNBP1, FGFR1, MAPK8, NR3C2, POMC, RORA, SLC18A1, CHAT, M6PR, MCHR1, SLC6A1
C1848178	Female external genitalia in males	0.00511678	5.35047	7	AR, CYP11A1, NR5A1, GATA4, SOX9, SRY, ZFPM2
C0279680	Transitional cell carcinoma of bladder	0.00537209	4.67605	8	AKT1, CTNNB1, EP300, PTEN, RB1, SRC, TP53, DLC1
C0678222	Breast Carcinoma	0.00572481	3.82177	10	AKT1, BRCA1, CDH1, CTNNB1, MDM2, MLH1, PTEN, TP53, TSG101, TWIST1
C0431483	Simple ear	0.00572481	3.15063	13	ATR, CREBBP, CTBP1, EBP, EP300, ETFA, FLNA, GRIP1, LMNA, TFAP2A, KIAA0586, ERCC6, MEOX1
C0857379	Auricular malformation	0.00572481	3.15063	13	ATR, CREBBP, CTBP1, EBP, EP300, ETFA, FLNA, GRIP1, LMNA, TFAP2A, KIAA0586, ERCC6, MEOX1
C0037926	Compression of spinal cord	0.00708009	5.96196	6	AKT1, FLNB, NME1, PLAT, CCL2, DDR2
C0018800	Cardiomegaly	0.00710887	2.16013	25	AHR, AKT1, CCND2, FHL2, GSK3B, HIF1A, JUP, NOS3, PLD2, PPARA, PPARD, PRKAA2, PRKCA, SMAD3, SRC, STAT3, TGFBR1, TRIM63, ACTA2, CTF1, GAA, GATA4, POMC, PRKCB, CLIC2
C0149925	Small cell carcinoma of lung	0.00722411	3.07561	13	CREBBP, EGFR, EP300, KMT2A, PTEN, RB1, RUNX1T1, TP53, ASCL1, ELAVL2, FGFR1, TP73, CKB
C1853562	Adult onset	0.00722411	2.39436	20	AKT1, AR, ATL1, ATXN1, DCTN1, HSPB1, MAPT, MUC1, NF2, NOTCH3, PDGFB, PRNP, PSEN1, PTEN, SMN1, TSC1, EEF2, MN1, NOL3, UBQLN2
C0027659	Neoplasms, Experimental	0.00766726	3.22268	12	ABL1, AHR, ARNT, CCND1, CDK4, ERBB2, PCNA, PRNP, RB1, RELA, SPP1, NQO1
C0206731	Angiofibroma	0.00766726	7.09757	5	CDKN1B, CDKN2C, TSC1, CDKN2B, TSC2
C0025202	melanoma	0.00766726	1.80245	39	ARNT, ATM, AURKA, C11orf68, CASP10, CASP8, CDK2, CDK4, CUL3, E2F1, EP300, F2RL1, GOPC, HDAC6, MDM2, MGMT, MITF, MTPAP, POT1, PPARG, PRDX2, PTEN, RAC1, SETDB1, STIP1, SYK, TP53, APEX1, CDKN2A, CDKN2B, CDKN2D, EPO, KHDRBS2, MAP2K1, MAP3K5, PAX6, POMC, RIN1, TFPI2
C0677776	Hereditary Breast and Ovarian Cancer Syndrome	0.00766726	4.9683	7	BARD1, BRCA1, PTEN, TP53, MRE11, NBN, RAD50
C0024228	Lymphatic Diseases	0.00766726	4.9683	7	CDK4, MGMT, MITF, POT1, CDKN2A, CDKN2B, CDKN2D
C4021976	Abnormality of the lymphatic system	0.00766726	4.9683	7	CDK4, MGMT, MITF, POT1, CDKN2A, CDKN2B, CDKN2D
C4023101	Elevated luteinizing hormone	0.00766726	4.9683	7	AR, CYP11A1, NR5A1, GATA4, SOX9, SRY, ZFPM2
C0008370	Cholestasis	0.00766726	2.36586	20	CCL7, MAPK14, NR1H3, PAN2, PDYN, RDX, RELA, CXCL8, DCDC2, EGR1, NOTCH2, NR1H2, NR1H4, POMC, SNAI1, CYP27A1, HSD17B4, NQO1, PCSK1, TMED7
C0221260	Dystrophia unguium	0.00766726	2.76017	15	ATL1, DSP, FLNA, GJB2, JUP, KRT1, KRT5, KRT6A, KRT6B, HOXC13, KRT16, KRT17, NFKB2, RECQL4, TP63
C0015300	Exophthalmos	0.00766726	2.25366	22	ATXN3, CREBBP, CTBP1, EP300, FLNA, FLNB, LMNA, NDE1, TCF12, THRB, WNT5A, CITED2, FGFR1, GATA4, GATA6, RECQL4, ROR2, SOX9, TWIST1, ZFPM2, ZIC1, DDR2
C1837760	Prominent eyes	0.00766726	2.25366	22	ATXN3, CREBBP, CTBP1, EP300, FLNA, FLNB, LMNA, NDE1, TCF12, THRB, WNT5A, CITED2, FGFR1, GATA4, GATA6, RECQL4, ROR2, SOX9, TWIST1, ZFPM2, ZIC1, DDR2
C1848490	Protruding eyes	0.00766726	2.25366	22	ATXN3, CREBBP, CTBP1, EP300, FLNA, FLNB, LMNA, NDE1, TCF12, THRB, WNT5A, CITED2, FGFR1, GATA4, GATA6, RECQL4, ROR2, SOX9, TWIST1, ZFPM2, ZIC1, DDR2
C1862425	Prominent globes	0.00766726	2.25366	22	ATXN3, CREBBP, CTBP1, EP300, FLNA, FLNB, LMNA, NDE1, TCF12, THRB, WNT5A, CITED2, FGFR1, GATA4, GATA6, RECQL4, ROR2, SOX9, TWIST1, ZFPM2, ZIC1, DDR2
C0026034	Microstomia	0.00766726	2.42045	19	AKT1, CCND2, CREBBP, EIF4A3, EP300, FLNA, LMNA, MAF, PTEN, SMAD4, ZBTB16, AUTS2, MAPRE2, NOTCH2, OTX2, RECQL4, TNNI2, TP63, YWHAE
C1849089	Broad forehead	0.00782154	2.64976	16	EZH2, FLNA, GTF2IRD1, HBA1, PTEN, TCF12, CITED2, GATA4, GATA6, MEF2C, NOTCH2, TWIST1, ZFPM2, ZIC1, KCNJ2, PIGN
C0079773	Lymphoma, T-Cell, Cutaneous	0.00845921	3.88823	9	ATM, RHOA, TP53, ZEB1, ARID1A, CDKN2A, MCL1, NFKB2, STAT5B
C0741796	Recurrent bronchitis	0.00845921	3.88823	9	ATM, C1R, NFKB1, PLG, PRKCD, CD79A, NBN, NFKB2, ICOS
C0022116	Ischemia	0.00901842	3.54878	10	CYCS, MAPK9, NOS3, PCNA, PLAU, PPARG, TP53, ACTA2, EGR1, CXCL12
C2981150	Uranostaphyloschisis	0.00901842	1.90402	32	ACTB, ATR, CTBP1, EIF4A3, FLNA, FLNB, GRIP1, RAP1B, RB1, RBM10, RPL5, RUNX2, STAMBP, STAT3, TFAP2A, KIAA0586, ALX1, FGFR1, MAPRE2, MEOX1, MID1, MYOD1, NBN, OTX2, POLR1C, RECQL4, SOX9, TP63, TWIST1, KCNJ2, PIGN, RPS24
C1865027	Hypoplastic iliac wing	0.0101845	4.18383	8	CREBBP, EP300, EZH2, HDAC6, RUNX2, SMAD4, ERCC6, SOX9
C0027051	Myocardial Infarction	0.0102758	2.15605	23	APOE, ATM, BCL2, BCL2L1, CASP3, CREB1, ESR1, GSK3B, HMGB1, LMNA, NOS3, PLAT, PLAU, TP53, ACTA2, BECN1, DDIT3, EPO, GATA4, NR3C2, PPARGC1A, CKB, CYP27A1
C0282612	Prostatic Intraepithelial Neoplasias	0.0105863	5.41996	6	AR, CDH1, CDKN1B, ESR1, ESR2, PTEN
C0001624	Adrenal Gland Neoplasms	0.0105863	5.41996	6	CDC42, CTNNB1, PRKACA, RB1, TP53, CDKN2A
C1876165	Copper-Overload Cirrhosis	0.0105863	5.41996	6	CASP3, KRT19, SMAD2, STAT3, ACTA2, KRT7
C4021550	Elevated follicle stimulating hormone	0.0108207	4.63708	7	AR, CYP11A1, NR5A1, GATA4, SOX9, SRY, ZFPM2
C4021972	Urogenital sinus anomaly	0.0108207	4.63708	7	CYP11A1, NR5A1, SRD5A2, GATA4, SOX9, SRY, ZFPM2
C0014474	Ependymoma	0.0108207	4.63708	7	ERBB2, MLH1, RAB3A, RELA, TSC1, MSH6, TSC2
C0011853	Diabetes Mellitus, Experimental	0.0111099	2.1359	23	ATP2A3, BCL2, BCL2L1, CASP3, FOXO3, IRS1, NOS3, PPARA, PPARG, PRKCA, PRKCD, RELA, SIRT1, TP53, ESRRA, IRS2, MAP3K5, NEUROD1, PAX6, PPARGC1A, SREBF1, YWHAH, NQO1
C0025990	Micrognathism	0.0126073	1.6561	46	AKT1, ANKRD11, ATR, CDC6, CDK5, CREBBP, CTBP1, DNMT3B, EP300, ERBB3, EZH2, FLNA, FLNB, GTF2IRD1, HBA1, LMNA, NOTCH3, PTEN, RB1, RBM10, RPL5, RUNX2, SUMO1, TFAP2A, TGFBR1, WNT5A, ERCC6, FGFR1, GATA4, MAP2K1, MAPRE2, MYOD1, NBN, NOTCH2, PAX6, PIK3R1, POLR1C, RARB, RECQL4, ROR2, SOX9, TNNI2, TP63, DDR2, HSD17B4, PIGN
C0240295	Mandibular hypoplasia	0.0126073	1.6561	46	AKT1, ANKRD11, ATR, CDC6, CDK5, CREBBP, CTBP1, DNMT3B, EP300, ERBB3, EZH2, FLNA, FLNB, GTF2IRD1, HBA1, LMNA, NOTCH3, PTEN, RB1, RBM10, RPL5, RUNX2, SUMO1, TFAP2A, TGFBR1, WNT5A, ERCC6, FGFR1, GATA4, MAP2K1, MAPRE2, MYOD1, NBN, NOTCH2, PAX6, PIK3R1, POLR1C, RARB, RECQL4, ROR2, SOX9, TNNI2, TP63, DDR2, HSD17B4, PIGN
C1857130	Hypoplastic mandible condyle	0.0126073	1.6561	46	AKT1, ANKRD11, ATR, CDC6, CDK5, CREBBP, CTBP1, DNMT3B, EP300, ERBB3, EZH2, FLNA, FLNB, GTF2IRD1, HBA1, LMNA, NOTCH3, PTEN, RB1, RBM10, RPL5, RUNX2, SUMO1, TFAP2A, TGFBR1, WNT5A, ERCC6, FGFR1, GATA4, MAP2K1, MAPRE2, MYOD1, NBN, NOTCH2, PAX6, PIK3R1, POLR1C, RARB, RECQL4, ROR2, SOX9, TNNI2, TP63, DDR2, HSD17B4, PIGN
C0221354	Frontal bossing	0.0129601	1.89871	30	ANKRD11, CREBBP, EBP, EP300, FLNA, FLNB, HDAC6, NFKBIA, PTEN, RUNX2, SLC3A1, STAT3, TCF12, TRIM37, WNT5A, FGFR1, GJA8, MAP2K1, MID1, PIK3R1, POLR1C, RECQL4, ROR2, TWIST1, VDR, YWHAE, ZIC1, DDR2, HSD17B4, PPM1B
C0345967	Malignant mesothelioma	0.0140744	2.09671	23	AGO2, BCL2, CCL5, CCL7, CDK6, CTNNB1, EGFR, FN1, MUC1, NF2, RXRA, RYR2, SETDB1, TP53, TXN, VIM, AGO1, CCL23, CCL3, CDKN2A, CXCL8, CXCL12, GPR27
C0525045	Mood Disorders	0.0141674	1.80665	34	AKT1, AR, ARNTL, CLOCK, CREB1, DCTN1, DISC1, DLG4, DNMT3B, ESR1, GAD2, GLUL, GSK3B, HDAC1, HIF1A, KAT2B, NFKB1, NR3C1, PDYN, PPARG, PRNP, SAT1, SERTAD1, SIRT1, TSNAX, SLC12A5, DAO, DTNBP1, FOSB, RARA, SIRT2, VIP, MCHR1, NQO1
C1168401	Squamous cell carcinoma of the head and neck	0.0145725	3.3122	10	AKT1, CASP8, ING1, MGMT, PTEN, STAT3, TNFRSF10B, TP53, CDKN2A, HOXD10
C4020960	Abnormality of nail color	0.0145725	7.94928	4	KRT6A, KRT6B, KRT16, KRT17
C0039101	synovial sarcoma	0.0145725	7.94928	4	BCL2, SSX2, VIM, SS18
[truncated: 101 more rows]

## Sheet: Data File S9
Data File S9. Complete list of HLHS-related biological evidence of genes in the HLHS protein interactome: A "yes" indicates the presence of a particular evidence for a given gene.
[truncated: 1,700 more rows]

## Sheet: Data File S10
Data File S10. 473 genes shared between the hypoplastic left heart syndrome (HLHS) interactome and the ciliopathy interactome: The labels of each of the genes in the HLHS interactome and the ciliopathy interactome have been shown.
[truncated: 474 more rows]

[truncated: 1 more sheets: Data File S11]
